# Supplementary material
Source: publisher figshare collection journal article supplement (https://gsajournals.figshare.com/ndownloader/files/27808884)
Supplement: Supplementary file 1 [file 27808884]

## Sheet: Total results
Quantified Proteins - RpS28a OE vs Control
Group: Identified proteins that share one or more peptides are grouped together (e.g. 01). The group is represented by the protein with maximal spectra count (e.g. 01.1). If other proteins in the same group are assigned with at least one uniquely identified peptides, these proteins are also counted as unique proteins (e.g. 01.2);SC: the summed number of spectral counts (i.e. MS/MS scans) assigned…
			Control -replicate #1	Control - replicate #2	Control - replicate #3	Control - replicate #4	RpS28a OE - replicate #1	RpS28a OE - replicate #2	RpS28a OE - replicate #3
Group	Accession #	Protein Annotation	sig126	sig127	sig127b	sig128	sig128b	sig129	sig129b	SC	TP	MW (KD)	Abundance	p-value	Average Control	Average RpS28a OE	FoldChange (RpS28a OE/Control)	score [-log10 (p-value)]
3036.1	tr|Q8IN71|Q8IN71_DROME	CG16718, isoform B OS=Drosophila melanogaster GN=CG16718 PE=2 SV=1	0.9	0.91	0.94	0.91	1.1	1.12	1.12	5	4	108	2.3	1.28852e-05	0.915	1.11333	1.21676	4.88991
3306.1	tr|Q9VBS4|Q9VBS4_DROME	CG10553 OS=Drosophila melanogaster GN=CG10553 PE=2 SV=1	0.73	0.61	0.73	0.71	1.45	1.33	1.44	4	3	48	4.2	2.22765e-05	0.695	1.40667	2.02398	4.65215
3665.1	tr|Q9VD40|Q9VD40_DROME	CG7084, isoform B OS=Drosophila melanogaster GN=CG7084 PE=2 SV=1	0.92	0.92	0.92	0.91	1.1	1.14	1.09	3	3	68	2.2	2.65539e-05	0.9175	1.11	1.20981	4.57587
4986.1	tr|Q7JR83|Q7JR83_DROME	CG11055, isoform A OS=Drosophila melanogaster GN=CG11055 PE=2 SV=1	0.89	0.91	0.9	0.84	1.17	1.14	1.15	1	1	97	0.5	3.93771e-05	0.885	1.15333	1.3032	4.40476
1309.1	tr|Q9VAB9|Q9VAB9_DROME	RT02924p OS=Drosophila melanogaster GN=RpS28a PE=2 SV=1	0.3	0.28	0.34	0.31	1.99	2.18	1.61	21	3	7	143.4	8.76748e-05	0.3075	1.92667	6.26558	4.05713
5011.1	tr|Q9VTG0|Q9VTG0_DROME	CG42575 OS=Drosophila melanogaster GN=CG7628-RA PE=2 SV=2	0.74	0.76	0.87	0.86	1.25	1.27	1.25	1	1	72	0.7	9.82764e-05	0.8075	1.25667	1.55624	4.00755
1960.1	tr|Q9VVT6|Q9VVT6_DROME	CG6852, isoform A OS=Drosophila melanogaster GN=CG6852 PE=2 SV=1	0.92	0.9	0.95	0.88	1.13	1.12	1.1	12	2	12	48.4	0.000125481	0.9125	1.11667	1.22374	3.90142
2103.1	tr|Q9VGT8|Q9VGT8_DROME	Ugt86Dd (Fragment) OS=Drosophila melanogaster GN=Ugt86Dd PE=3 SV=2	0.88	0.84	0.93	0.88	1.13	1.2	1.14	10	6	59	8.5	0.000204355	0.8825	1.15667	1.31067	3.68961
1969.1	tr|Q9VGC2|Q9VGC2_DROME	CG4860 OS=Drosophila melanogaster GN=CG4860 PE=2 SV=1	0.91	0.9	0.94	0.92	1.08	1.1	1.15	11	8	45	12.3	0.000211981	0.9175	1.11	1.20981	3.6737
4365.1	tr|Q7PLV6|Q7PLV6_DROME	CG40470 OS=Drosophila melanogaster GN=CG40470-RA PE=2 SV=2	0.85	0.88	0.88	0.95	1.12	1.19	1.14	2	1	109	0.9	0.000368416	0.89	1.15	1.29213	3.43366
710.1	sp|Q9VGR2|MIDA_DROME	Protein midA homolog, mitochondrial OS=Drosophila melanogaster GN=CG17726 PE=1 SV=1	0.93	0.83	0.93	0.86	1.16	1.16	1.13	41	12	49	41.8	0.000381386	0.8875	1.15	1.29577	3.41863
1373.1	sp|Q9VFJ0|CP131_DROME	Probable cytochrome P450 313a1 OS=Drosophila melanogaster GN=Cyp313a1 PE=3 SV=2	0.89	0.84	0.8	0.8	1.27	1.13	1.27	19	12	56	16.8	0.000391154	0.8325	1.22333	1.46947	3.40765
2637.1	tr|Q9VGF1|Q9VGF1_DROME	CG3397 OS=Drosophila melanogaster GN=CG3397 PE=2 SV=1	0.45	0.32	0.47	0.39	1.67	1.53	2.18	7	4	38	9.2	0.000451354	0.4075	1.79333	4.40082	3.34548
5539.1	tr|Q86BS2|Q86BS2_DROME	CG2017, isoform B OS=Drosophila melanogaster GN=CG2017 PE=2 SV=1	1.12	1.27	1.27	1.27	0.81	0.63	0.63	1	1	66	0.8	0.000465741	1.2325	0.69	0.559838	3.33186
2721.1	tr|Q9W3B8|Q9W3B8_DROME	CG12075, isoform A OS=Drosophila melanogaster GN=CG12075-RB PE=2 SV=3	0.92	0.94	0.96	0.98	1.08	1.07	1.06	7	1	114	3.1	0.000670293	0.95	1.07	1.12632	3.17374
990.1	tr|Q9XZ61|Q9XZ61_DROME	26S proteasome regulatory complex subunit p37A OS=Drosophila melanogaster GN=Uch-L3 PE=2 SV=1	0.9	0.81	0.92	0.85	1.19	1.23	1.11	29	10	38	38.5	0.000725552	0.87	1.17667	1.35249	3.13933
3053.1	sp|P10090|WHITE_DROME	Protein white OS=Drosophila melanogaster GN=w PE=2 SV=2	0.87	0.82	0.85	0.89	1.25	1.22	1.09	5	3	76	3.3	0.000726873	0.8575	1.18667	1.38387	3.13854
3967.1	tr|Q8SX37|Q8SX37_DROME	Phosphatidylinositol synthase, isoform A OS=Drosophila melanogaster GN=Pis PE=2 SV=1	0.94	0.97	0.98	0.96	1.04	1.07	1.05	3	1	25	5.9	0.000774634	0.9625	1.05333	1.09437	3.1109
3187.1	tr|Q8SY97|Q8SY97_DROME	CG33178 OS=Drosophila melanogaster GN=CG33178 PE=2 SV=1	1.09	1.12	1.15	1.15	0.92	0.76	0.82	5	1	19	13.2	0.000974039	1.1275	0.833333	0.739098	3.01142
1133.1	tr|Q9VS57|Q9VS57_DROME	RE14391p OS=Drosophila melanogaster GN=sec63 PE=2 SV=1	0.96	0.91	0.98	0.94	1.06	1.08	1.07	25	9	86	14.6	0.00112934	0.9475	1.07	1.12929	2.94718
2409.1	tr|Q9W0M0|Q9W0M0_DROME	CG13890 OS=Drosophila melanogaster GN=CG13890 PE=1 SV=1	0.9	0.83	0.95	0.93	1.13	1.1	1.16	8	5	29	13.7	0.00117114	0.9025	1.13	1.25208	2.93139
2261.1	tr|Q9VHC4|Q9VHC4_DROME	CG8176, isoform B OS=Drosophila melanogaster GN=CG8176 PE=2 SV=2	0.97	0.93	0.94	0.93	1.08	1.11	1.04	9	6	119	3.8	0.00119999	0.9425	1.07667	1.14235	2.92082
2677.1	tr|Q9VVE3|Q9VVE3_DROME	CG7724 OS=Drosophila melanogaster GN=CG7724 PE=2 SV=1	0.96	0.89	0.95	0.94	1.07	1.07	1.12	7	3	45	7.8	0.00122479	0.935	1.08667	1.16221	2.91194
2011.1	sp|P52302|MBN_DROME	Protein lethal(3)malignant blood neoplasm 1 OS=Drosophila melanogaster GN=l(3)mbn PE=2 SV=2	0.85	0.94	0.93	0.91	1.16	1.07	1.13	11	6	67	8.2	0.00125935	0.9075	1.12	1.23416	2.89985
1237.1	sp|Q9W495|PGAP1_DROME	GPI inositol-deacylase OS=Drosophila melanogaster GN=CG3160 PE=1 SV=3	0.97	0.95	0.96	0.98	1.04	1.03	1.07	22	9	112	9.9	0.00131624	0.965	1.04667	1.08463	2.88067
3089.1	tr|Q8IMT6|Q8IMT6_DROME	CG31300 OS=Drosophila melanogaster GN=CG31300 PE=2 SV=1	1.1	1.08	1.21	1.14	0.88	0.85	0.74	5	3	49	5	0.00149859	1.1325	0.823333	0.727005	2.82432
522.1	tr|Q9VBS7|Q9VBS7_DROME	CG10550, isoform A OS=Drosophila melanogaster GN=CG10550 PE=2 SV=1	0.95	0.96	0.99	0.95	1.04	1.07	1.04	56	13	49	57	0.00152643	0.9625	1.05	1.09091	2.81632
962.1	sp|P83094|STIM_DROME	Stromal interaction molecule homolog OS=Drosophila melanogaster GN=Stim PE=1 SV=1	0.95	0.93	0.99	0.96	1.07	1.07	1.04	30	9	65	23.2	0.00180266	0.9575	1.06	1.10705	2.74409
4081.1	tr|Q9VT38|Q9VT38_DROME	CG18178 OS=Drosophila melanogaster GN=CG18178 PE=2 SV=1	1.19	1.11	1.1	1.17	0.83	0.9	0.7	2	2	42	2.4	0.00187008	1.1425	0.81	0.708972	2.72814
989.1	tr|Q9VDG5|Q9VDG5_DROME	AT07459p OS=Drosophila melanogaster GN=Calx PE=1 SV=1	0.97	0.91	0.97	0.94	1.09	1.04	1.09	29	10	106	13.7	0.00227602	0.9475	1.07333	1.13281	2.64282
1872.1	tr|Q9VBS3|Q9VBS3_DROME	CG10560 OS=Drosophila melanogaster GN=CG10560 PE=2 SV=2	0.92	0.95	0.88	0.89	1.19	1.09	1.07	12	8	48	12.5	0.00231902	0.91	1.11667	1.22711	2.6347
4218.1	tr|Q7K2N3|Q7K2N3_DROME	CG4288, isoform A OS=Drosophila melanogaster GN=CG4288 PE=2 SV=1	0.84	0.9	0.98	0.89	1.11	1.18	1.1	2	2	56	1.8	0.00240334	0.9025	1.13	1.25208	2.61919
1130.1	tr|Q7KUC2|Q7KUC2_DROME	CG34455 OS=Drosophila melanogaster GN=CG34455-RC PE=2 SV=1	0.93	0.78	0.95	0.87	1.13	1.2	1.14	25	9	33	37.4	0.00245379	0.8825	1.15667	1.31067	2.61016
2050.1	tr|Q9VCR4|Q9VCR4_DROME	CG17111 OS=Drosophila melanogaster GN=CG17111 PE=2 SV=1	0.92	0.87	0.96	0.88	1.12	1.18	1.06	11	4	88	6.3	0.00247817	0.9075	1.12	1.23416	2.60587
483.1	sp|Q9VZI3|UN112_DROME	Unc-112-related protein OS=Drosophila melanogaster GN=Fit1 PE=1 SV=1	0.98	0.93	0.98	0.94	1.05	1.07	1.04	61	14	80	37.9	0.00257795	0.9575	1.05333	1.10009	2.58873
1071.1	tr|Q8IMM1|Q8IMM1_DROME	CG9990, isoform B OS=Drosophila melanogaster GN=CG9990 PE=2 SV=1	0.94	0.98	0.98	0.94	1.03	1.07	1.06	27	7	86	15.8	0.0027111	0.96	1.05333	1.09722	2.56686
4818.1	tr|Q6NN55|Q6NN55_DROME	CG18445 OS=Drosophila melanogaster GN=oys PE=2 SV=1	0.93	0.94	0.94	0.83	1.07	1.13	1.16	1	1	81	0.6	0.002862	0.91	1.12	1.23077	2.54333
187.2	sp|Q7KN62-3|TERA_DROME	Isoform C of Transitional endoplasmic reticulum ATPase TER94 OS=Drosophila melanogaster GN=TER94	0.97	0.94	1	0.95	1.05	1.05	1.05	142	27	92	77.2	0.00287081	0.965	1.05	1.08808	2.542
2282.1	sp|Q9W1K5|SESN_DROME	Sestrin homolog OS=Drosophila melanogaster GN=CG11299 PE=1 SV=2	0.95	0.91	0.93	0.97	1.03	1.1	1.11	9	5	56	8.1	0.00298558	0.94	1.08	1.14894	2.52497
3209.1	sp|Q9VDD1|DDRGK_DROME	DDRGK domain-containing protein 1 OS=Drosophila melanogaster GN=CG5862 PE=1 SV=1	0.93	0.98	0.97	0.97	1.03	1.07	1.05	4	4	34	5.8	0.00301261	0.9625	1.05	1.09091	2.52106
2664.1	sp|Q9VF71|CUTC_DROME	Copper homeostasis protein cutC homolog OS=Drosophila melanogaster GN=CG6136 PE=2 SV=1	0.87	0.92	0.96	0.91	1.11	1.17	1.05	7	3	29	12.1	0.00301327	0.915	1.11	1.21311	2.52096
1437.1	tr|Q0E990|Q0E990_DROME	CG42321, isoform P OS=Drosophila melanogaster GN=CG42321 PE=2 SV=2	0.97	0.94	0.99	0.97	1.06	1.03	1.04	18	11	147	6.1	0.0031404	0.9675	1.04333	1.07838	2.50301
2910.1	tr|Q9VR42|Q9VR42_DROME	CG3008 OS=Drosophila melanogaster GN=CG3008 PE=2 SV=1	0.95	0.87	0.93	0.99	1.08	1.1	1.1	6	2	69	4.3	0.00329901	0.935	1.09333	1.16934	2.48162
3337.1	tr|Q9VS80|Q9VS80_DROME	CG8539 OS=Drosophila melanogaster GN=CG8539 PE=1 SV=1	0.91	0.84	0.96	0.94	1.14	1.14	1.06	4	3	44	4.5	0.00332538	0.9125	1.11333	1.22009	2.47816
4546.1	sp|Q24025|SOG_DROME	Dorsal-ventral patterning protein Sog OS=Drosophila melanogaster GN=sog PE=1 SV=1	0.92	0.95	0.85	0.78	1.1	1.17	1.24	2	1	115	0.9	0.00333605	0.875	1.17	1.33714	2.47677
2148.1	tr|Q9VBU0|Q9VBU0_DROME	CG11889 OS=Drosophila melanogaster GN=CG11889 PE=1 SV=2	1.07	1.12	1.14	1	0.9	0.89	0.87	10	5	48	10.3	0.0034577	1.0825	0.886667	0.819092	2.46121
187.1	sp|Q7KN62|TERA_DROME	Transitional endoplasmic reticulum ATPase TER94 OS=Drosophila melanogaster GN=TER94 PE=1 SV=1	0.97	0.94	1	0.95	1.04	1.05	1.05	147	27	89	82.8	0.00365577	0.965	1.04667	1.08463	2.43702
1733.1	tr|Q9VZX9|Q9VZX9_DROME	Adenosylhomocysteinase OS=Drosophila melanogaster GN=CG9977-RA PE=2 SV=1	0.97	0.93	0.99	0.95	1.07	1.06	1.03	14	5	57	12.3	0.00375879	0.96	1.05333	1.09722	2.42495
266.1	tr|E1JGP2|E1JGP2_DROME	CG30296, isoform N OS=Drosophila melanogaster GN=RIC-3 PE=4 SV=1	0.94	0.96	1	0.94	1.05	1.04	1.07	101	15	52	97.5	0.00375879	0.96	1.05333	1.09722	2.42495
5522.1	sp|Q8IQF1-3|MOCS1_DROME	Isoform B of Molybdenum cofactor biosynthesis protein 1 OS=Drosophila melanogaster GN=Mocs1	0.88	0.71	0.86	0.85	1.17	1.39	1.14	1	1	16	3	0.00383241	0.825	1.23333	1.49495	2.41653
4890.1	tr|Q9VJK5|Q9VJK5_DROME	CG4580 OS=Drosophila melanogaster GN=CG4580 PE=2 SV=3	0.67	0.89	0.79	0.89	1.2	1.4	1.16	1	1	72	0.7	0.00390875	0.81	1.25333	1.54733	2.40796
2581.1	tr|Q8IQ82|Q8IQ82_DROME	Pastrel, isoform E OS=Drosophila melanogaster GN=pst PE=2 SV=2	1.08	1.03	1.08	1.07	0.97	0.91	0.86	7	5	75	4.7	0.00397203	1.065	0.913333	0.85759	2.40099
2307.1	tr|Q9VSK4|Q9VSK4_DROME	CG6983 OS=Drosophila melanogaster GN=CG6983 PE=2 SV=1	0.88	0.93	0.95	0.97	1.04	1.11	1.13	9	4	20	22.1	0.0041772	0.9325	1.09333	1.17248	2.37911
1347.1	tr|Q9VZI8|Q9VZI8_DROME	Fumarylacetoacetase OS=Drosophila melanogaster GN=Faa PE=2 SV=2	0.98	0.9	0.98	0.88	1.1	1.08	1.09	20	8	46	21.5	0.00438958	0.935	1.09	1.16578	2.35758
5693.1	sp|P22270|OAR_DROME	Tyramine/octopamine receptor OS=Drosophila melanogaster GN=TyrR PE=2 SV=2	0.89	0.9	0.96	0.82	1.05	1.18	1.19	1	1	65	0.8	0.00456498	0.8925	1.14	1.27731	2.34056
1925.1	tr|E1JHT2|E1JHT2_DROME	Transporter OS=Drosophila melanogaster GN=ine PE=3 SV=1	0.94	0.92	1.01	0.94	1.07	1.06	1.07	12	5	104	5.8	0.00465748	0.9525	1.06667	1.11986	2.33185
1740.1	tr|Q8T0T9|Q8T0T9_DROME	CG13920 OS=Drosophila melanogaster GN=BEST:CK00246 PE=2 SV=1	0.95	0.85	0.96	0.95	1.13	1.06	1.1	14	4	18	39.1	0.00478256	0.9275	1.09667	1.18239	2.32034
1484.1	tr|Q9VH96|Q9VH96_DROME	CG8358 OS=Drosophila melanogaster GN=CG8358 PE=2 SV=1	0.95	0.89	0.99	0.88	1.08	1.07	1.13	17	9	81	10.5	0.00479391	0.9275	1.09333	1.1788	2.31931
567.1	tr|Q9VM11|Q9VM11_DROME	CG5973, isoform A OS=Drosophila melanogaster GN=CG5973 PE=2 SV=2	0.95	0.92	0.97	0.91	1.06	1.05	1.15	52	8	36	72	0.00496367	0.9375	1.08667	1.15911	2.3042
2757.1	tr|Q0KI81|Q0KI81_DROME	CG42327 OS=Drosophila melanogaster GN=CG14713 PE=2 SV=2	0.91	0.94	1	0.88	1.06	1.12	1.1	6	5	154	1.9	0.00501151	0.9325	1.09333	1.17248	2.30003
4121.1	sp|Q24592|JAK_DROME	Tyrosine-protein kinase hopscotch OS=Drosophila melanogaster GN=hop PE=1 SV=2	0.96	0.94	0.99	0.9	1.08	1.04	1.09	2	2	135	0.7	0.00505585	0.9475	1.07	1.12929	2.29621
537.1	sp|P21521-2|SY65_DROME	Isoform B of Synaptotagmin 1 OS=Drosophila melanogaster GN=Syt1	0.99	0.99	0.99	0.96	1.03	1.03	1.02	55	14	53	51.9	0.00511329	0.9825	1.02667	1.04495	2.2913
1389.1	tr|Q9XZ01|Q9XZ01_DROME	Neprilysin 2 OS=Drosophila melanogaster GN=Nep2 PE=2 SV=1	0.92	0.86	1	0.88	1.12	1.07	1.16	19	9	87	10.9	0.00518595	0.915	1.11667	1.2204	2.28517
4609.1	sp|Q6J5K9|ARMI_DROME	Probable RNA helicase armi OS=Drosophila melanogaster GN=armi PE=2 SV=3	0.95	0.92	0.96	0.96	1.08	1.12	1.02	2	1	145	0.7	0.00533291	0.9475	1.07333	1.13281	2.27304
2923.1	tr|Q9W1F8|Q9W1F8_DROME	CG13565 OS=Drosophila melanogaster GN=CG13565 PE=2 SV=2	1.01	1.1	1.02	1.08	0.92	0.92	0.94	6	2	15	20.3	0.00533291	1.0525	0.926667	0.880443	2.27304
4116.1	tr|Q9Y141|Q9Y141_DROME	BcDNA.GH05741 OS=Drosophila melanogaster GN=BcDNA.GH05741 PE=2 SV=1	0.91	0.81	0.89	0.79	1.32	1.05	1.23	2	2	63	1.6	0.00549561	0.85	1.2	1.41176	2.25998
1035.2	sp|A1ZAI3|FACR2_DROME	Putative fatty acyl-CoA reductase CG8303 OS=Drosophila melanogaster GN=CG8303 PE=2 SV=2	0.95	0.96	1	0.96	1.06	1.03	1.03	14	2	70	10	0.00553371	0.9675	1.04	1.07494	2.25698
1949.1	tr|Q9VUV1|Q9VUV1_DROME	CG12486 OS=Drosophila melanogaster GN=CG12486 PE=2 SV=1	0.98	0.92	0.99	0.95	1.06	1.05	1.04	12	3	25	24.2	0.00554234	0.96	1.05	1.09375	2.25631
4934.1	tr|Q9VGW5|Q9VGW5_DROME	CG14687 OS=Drosophila melanogaster GN=CG14687 PE=2 SV=1	0.82	0.76	0.99	0.89	1.21	1.24	1.1	1	1	16	3.2	0.00558089	0.865	1.18333	1.36802	2.2533
3394.1	tr|E1JIU5|E1JIU5_DROME	Inwardly rectifying potassium channel 2, isoform C OS=Drosophila melanogaster GN=Irk2 PE=3 SV=1	0.97	0.91	0.98	0.91	1.06	1.12	1.05	4	3	52	3.9	0.00559191	0.9425	1.07667	1.14235	2.25244
5340.1	tr|Q9W0N7|Q9W0N7_DROME	RE70650p OS=Drosophila melanogaster GN=RabX6 PE=2 SV=1	0.93	0.88	0.97	0.99	1.08	1.08	1.07	1	1	24	2.1	0.00559191	0.9425	1.07667	1.14235	2.25244
958.1	sp|Q9V773|C6A20_DROME	Probable cytochrome P450 6a20 OS=Drosophila melanogaster GN=Cyp6a20 PE=2 SV=2	0.9	0.99	0.91	0.92	1.04	1.1	1.15	30	10	58	26	0.00564089	0.93	1.09667	1.17921	2.24865
3537.1	sp|Q9VWR5|CP306_DROME	Cytochrome P450 306a1 OS=Drosophila melanogaster GN=phm PE=1 SV=1	0.89	0.91	0.97	0.93	1.07	1.17	1.05	4	1	65	3.1	0.00566711	0.925	1.09667	1.18559	2.24664
272.1	tr|Q9VF27|Q9VF27_DROME	GM02062p OS=Drosophila melanogaster GN=ND23 PE=2 SV=1	0.96	0.97	0.98	0.99	1.04	1.05	1.01	100	8	25	203.6	0.00573706	0.975	1.03333	1.05983	2.24131
3498.1	tr|Q8SYF7|Q8SYF7_DROME	CG17715, isoform B OS=Drosophila melanogaster GN=CG17715 PE=2 SV=1	0.9	0.95	1	0.88	1.06	1.1	1.11	4	2	31	6.5	0.00587259	0.9325	1.09	1.1689	2.23117
5331.1	tr|Q9VXW7|Q9VXW7_DROME	Germ cell-expressed bHLH-PAS OS=Drosophila melanogaster GN=gce PE=2 SV=1	0.9	0.82	0.99	0.92	1.17	1.1	1.09	1	1	77	0.7	0.00596303	0.9075	1.12	1.23416	2.22453
851.1	sp|Q9VLZ7|C4D21_DROME	Probable cytochrome P450 4d21 OS=Drosophila melanogaster GN=Cyp4d21 PE=3 SV=1	1.01	0.88	0.9	0.85	1.08	1.12	1.17	34	7	58	29.2	0.00599409	0.91	1.12333	1.23443	2.22228
2496.1	tr|Q8IQB7|Q8IQB7_DROME	CG32032 OS=Drosophila melanogaster GN=CG32032-RA PE=2 SV=1	1.16	1.22	1.04	1.03	0.89	0.83	0.83	8	3	32	12.4	0.00599969	1.1125	0.85	0.764045	2.22187
1932.1	tr|Q9VVW3|Q9VVW3_DROME	CG6812 OS=Drosophila melanogaster GN=CG6812-RA PE=2 SV=2	0.93	0.88	0.97	0.88	1.16	1.03	1.15	12	4	36	16.4	0.00601944	0.915	1.11333	1.21676	2.22044
5330.1	sp|Q5EAK6|ATM_DROME	Serine/threonine-protein kinase ATM OS=Drosophila melanogaster GN=tefu PE=2 SV=1	0.81	0.94	0.96	0.94	1.1	1.16	1.09	1	1	318	0.2	0.00602678	0.9125	1.11667	1.22374	2.21991
1467.1	tr|Q7K0F7|Q7K0F7_DROME	CG11200, isoform A OS=Drosophila melanogaster GN=CG11200 PE=2 SV=1	0.95	0.91	1	0.93	1.04	1.07	1.1	18	4	40	22.7	0.00623994	0.9475	1.07	1.12929	2.20482
4636.1	sp|Q9VP22|CDK12_DROME	Cyclin-dependent kinase 12 OS=Drosophila melanogaster GN=Cdk12 PE=1 SV=1	1.07	0.99	1.05	1.06	0.93	0.95	0.95	1	1	128	0.4	0.00633314	1.0425	0.943333	0.904876	2.19838
264.1	tr|Q9VJ46|Q9VJ46_DROME	CG17323 OS=Drosophila melanogaster GN=CG17323 PE=2 SV=1	0.96	0.95	1	0.97	1.02	1.06	1.05	102	9	58	87.7	0.00634346	0.97	1.04333	1.0756	2.19767
5671.1	tr|Q86BA5|Q86BA5_DROME	LP01981p OS=Drosophila melanogaster GN=p24-2 PE=2 SV=1	0.95	0.91	0.95	0.95	1.15	1.07	1.03	1	1	28	1.8	0.00635477	0.94	1.08333	1.15248	2.1969
3204.1	tr|Q9VPB9|Q9VPB9_DROME	CG3947 OS=Drosophila melanogaster GN=pex16 PE=2 SV=1	0.98	0.99	0.94	0.91	1.05	1.05	1.08	4	4	39	5.1	0.00649458	0.955	1.06	1.10995	2.18745
575.1	tr|Q9VAL7|Q9VAL7_DROME	Calnexin 99A, isoform A OS=Drosophila melanogaster GN=Cnx99A PE=2 SV=2	0.95	0.92	1.01	0.94	1.07	1.06	1.05	51	16	68	37.5	0.00649458	0.955	1.06	1.10995	2.18745
5214.1	tr|A1ZB10|A1ZB10_DROME	CG30110 OS=Drosophila melanogaster GN=CG30110 PE=4 SV=1	0.71	0.74	0.98	0.68	1.41	1.1	1.38	1	1	71	0.7	0.00649906	0.7775	1.29667	1.66774	2.18715
589.1	tr|Q9VV51|Q9VV51_DROME	CG4729, isoform A OS=Drosophila melanogaster GN=CG4729 PE=2 SV=1	0.95	0.94	0.99	0.97	1.04	1.03	1.09	50	9	44	56.4	0.00658801	0.9625	1.05333	1.09437	2.18125
1276.1	tr|Q9VCC6|Q9VCC6_DROME	CG6178 OS=Drosophila melanogaster GN=CG6178 PE=2 SV=1	0.98	0.92	0.97	0.9	1.07	1.04	1.12	21	9	60	17.5	0.00661403	0.9425	1.07667	1.14235	2.17953
5520.1	sp|Q59E36|RCOR_DROME	REST corepressor OS=Drosophila melanogaster GN=CoRest PE=1 SV=1	0.84	0.9	0.95	0.96	1.19	1.1	1.06	1	1	70	0.7	0.00662499	0.9125	1.11667	1.22374	2.17881
4779.1	sp|P07664|SRYD_DROME	Serendipity locus protein delta OS=Drosophila melanogaster GN=Sry-delta PE=1 SV=2	0.93	0.92	0.99	0.87	1.05	1.09	1.15	1	1	50	1	0.00665187	0.9275	1.09667	1.18239	2.17706
1458.1	tr|Q8T0N3|Q8T0N3_DROME	CG30359, isoform B OS=Drosophila melanogaster GN=Mal-A5 PE=2 SV=1	0.98	0.93	0.97	0.99	1.04	1.05	1.03	18	6	62	14.6	0.00670144	0.9675	1.04	1.07494	2.17383
1566.1	tr|Q8MMC6|Q8MMC6_DROME	CG30427, isoform C OS=Drosophila melanogaster GN=CG30427 PE=2 SV=1	0.99	0.86	0.94	0.88	1.05	1.13	1.15	16	7	58	13.7	0.00673287	0.9175	1.11	1.20981	2.1718
5607.1	sp|P28750|EXU_DROME	Maternal protein exuperantia OS=Drosophila melanogaster GN=exu PE=1 SV=2	0.82	0.95	0.97	0.8	1.17	1.2	1.08	1	1	58	0.9	0.00684109	0.885	1.15	1.29944	2.16488
5312.1	tr|Q9VVK6|Q9VVK6_DROME	CG32186 OS=Drosophila melanogaster GN=CG32186 PE=4 SV=2	0.71	0.92	0.86	0.82	1.07	1.37	1.23	1	1	171	0.3	0.00685029	0.8275	1.22333	1.47835	2.16429
871.1	tr|Q9VCR9|Q9VCR9_DROME	CG17121 OS=Drosophila melanogaster GN=CG17121 PE=2 SV=1	0.98	0.9	0.98	0.91	1.12	1.07	1.05	33	10	39	41.8	0.00685786	0.9425	1.08	1.14589	2.16381
1662.1	tr|Q95SN8|Q95SN8_DROME	CG31200 OS=Drosophila melanogaster GN=CG17837 PE=2 SV=1	0.93	0.97	0.95	0.96	1.07	1.1	1.01	15	4	32	23.4	0.00690541	0.9525	1.06	1.11286	2.16081
369.1	tr|Q86BJ0|Q86BJ0_DROME	CG18135, isoform C OS=Drosophila melanogaster GN=CG18135 PE=2 SV=1	0.96	0.86	0.98	0.81	1.14	1.08	1.16	79	20	80	49.1	0.00761228	0.9025	1.12667	1.24838	2.11849
1456.1	tr|Q9VTU9|Q9VTU9_DROME	CG6910 OS=Drosophila melanogaster GN=CG6910 PE=2 SV=3	0.93	0.81	1.01	0.86	1.14	1.1	1.16	18	6	34	26.3	0.00761423	0.9025	1.13333	1.25577	2.11837
644.1	tr|A1Z8H1|A1Z8H1_DROME	Cuticular protein 47Ea OS=Drosophila melanogaster GN=Cpr47Ea PE=4 SV=1	0.98	0.93	0.96	0.96	1.08	1.01	1.08	46	3	14	158.9	0.00765648	0.9575	1.05667	1.10357	2.11597
3279.1	sp|Q9W4C5|NAAT1_DROME	Sodium-dependent nutrient amino acid transporter 1 OS=Drosophila melanogaster GN=NAAT1 PE=1 SV=2	0.99	0.93	0.99	0.92	1.05	1.05	1.08	4	3	72	2.8	0.00773035	0.9575	1.06	1.10705	2.1118
3331.1	tr|Q7K025|Q7K025_DROME	CG11892, isoform A OS=Drosophila melanogaster GN=CG11892 PE=2 SV=1	0.84	0.94	0.93	0.99	1.13	1.11	1.06	4	3	50	4	0.00783017	0.925	1.1	1.18919	2.10623
4567.1	tr|Q8IQU7|Q8IQU7_DROME	825-Oak OS=Drosophila melanogaster GN=825-Oak PE=4 SV=2	0.93	0.85	1.01	0.81	1.14	1.16	1.1	2	1	13	7.9	0.00785808	0.9	1.13333	1.25926	2.10468
3700.1	tr|Q0E9C6|Q0E9C6_DROME	CG30015, isoform A OS=Drosophila melanogaster GN=CG30015-RB PE=2 SV=1	0.95	0.93	0.99	0.97	1.02	1.08	1.05	3	3	157	0.9	0.00790539	0.96	1.05	1.09375	2.10208
4607.1	tr|Q7KWG9|Q7KWG9_DROME	CG17018, isoform D OS=Drosophila melanogaster GN=CG17018-RD PE=2 SV=1	0.92	0.96	0.98	0.91	1.06	1.04	1.14	2	1	148	0.7	0.0079152	0.9425	1.08	1.14589	2.10154
426.1	tr|B7YZF0|B7YZF0_DROME	Skiff, isoform C OS=Drosophila melanogaster GN=metro PE=4 SV=1	0.98	0.93	1	0.95	1.04	1.06	1.04	70	13	66	53.3	0.0081008	0.965	1.04667	1.08463	2.09147
2627.1	tr|Q9VAQ0|Q9VAQ0_DROME	Cullin-5 OS=Drosophila melanogaster GN=Cul-5 PE=1 SV=1	0.99	0.97	1	0.97	1.02	1.02	1.02	7	4	97	3.6	0.00828179	0.9825	1.02	1.03817	2.08188
1295.1	sp|Q8IPM8|CPLX_DROME	Complexin OS=Drosophila melanogaster GN=cpx PE=2 SV=1	0.98	0.97	0.98	1	1.01	1.03	1.04	21	6	16	64	0.00837767	0.9825	1.02667	1.04495	2.07688
4782.1	tr|Q9VBE6|Q9VBE6_DROME	CG5455, isoform A OS=Drosophila melanogaster GN=CG5455 PE=2 SV=1	0.83	0.84	0.96	0.97	1.15	1.06	1.2	1	1	77	0.7	0.00839537	0.9	1.13667	1.26296	2.07596
606.1	tr|Q9VC62|Q9VC62_DROME	CG6643, isoform A OS=Drosophila melanogaster GN=Esyt2 PE=2 SV=1	1	0.9	0.97	0.94	1.08	1.05	1.06	48	23	91	26.4	0.00841131	0.9525	1.06333	1.11636	2.07514
2487.1	tr|Q9VCJ8|Q9VCJ8_DROME	GH28857p OS=Drosophila melanogaster GN=SPE PE=2 SV=2	0.99	0.9	0.96	0.89	1.14	1.06	1.06	8	3	44	9.1	0.00847331	0.935	1.08667	1.16221	2.07195
5114.1	tr|Q9VGQ8|Q9VGQ8_DROME	CG17184, isoform A OS=Drosophila melanogaster GN=CG17184 PE=2 SV=1	0.93	0.79	1	0.81	1.19	1.19	1.09	1	1	39	1.3	0.00849765	0.8825	1.15667	1.31067	2.0707
3384.1	sp|P22058|CPD1_DROME	Chromosomal protein D1 OS=Drosophila melanogaster GN=D1 PE=1 SV=3	0.89	0.95	0.95	0.98	1.12	1.07	1.03	4	3	37	5.4	0.00853957	0.9425	1.07333	1.13882	2.06856
4437.1	tr|Q9VPX2|Q9VPX2_DROME	CG4726 OS=Drosophila melanogaster GN=CG4726 PE=2 SV=1	0.93	0.9	1.01	0.88	1.14	1.07	1.07	2	1	55	1.8	0.00862741	0.93	1.09333	1.17563	2.06412
2695.1	sp|Q9W552|VPS26_DROME	Vacuolar protein sorting-associated protein 26 OS=Drosophila melanogaster GN=Vps26 PE=2 SV=1	0.9	0.99	0.93	0.94	1.13	1.07	1.03	7	2	53	6.7	0.0088541	0.94	1.07667	1.14539	2.05286
775.1	tr|Q9V438|Q9V438_DROME	CaBP1 OS=Drosophila melanogaster GN=CaBP1 PE=2 SV=1	0.96	0.84	0.99	0.93	1.12	1.1	1.07	38	9	47	40.7	0.00896466	0.93	1.09667	1.17921	2.04747
4571.1	tr|A8DYD3|A8DYD3_DROME	Combgap, isoform F OS=Drosophila melanogaster GN=cg PE=4 SV=1	0.92	0.93	0.99	0.97	1.09	1.02	1.07	2	1	84	1.2	0.00929908	0.9525	1.06	1.11286	2.03156
3998.1	tr|Q9VG59|Q9VG59_DROME	CG5608 OS=Drosophila melanogaster GN=CG5608-RA PE=2 SV=1	1.01	0.94	0.95	0.96	1.05	1.03	1.07	2	2	78	1.3	0.00943625	0.965	1.05	1.08808	2.0252
3824.1	tr|Q9VW84|Q9VW84_DROME	CG7328 OS=Drosophila melanogaster GN=CG7328 PE=2 SV=1	0.98	0.91	0.98	0.95	1.07	1.07	1.02	3	2	34	4.4	0.00949296	0.955	1.05333	1.10297	2.0226
3511.1	tr|Q8MLN7|Q8MLN7_DROME	Cuticular protein 60D OS=Drosophila melanogaster GN=Cpr60D PE=2 SV=1	0.95	0.88	0.96	0.89	1.07	1.05	1.2	4	1	10	19.5	0.00988796	0.92	1.10667	1.2029	2.00489
1824.1	tr|Q9VQT0|Q9VQT0_DROME	Dorothy OS=Drosophila melanogaster GN=Dot PE=2 SV=3	0.97	0.9	0.99	0.96	1.08	1.08	1.03	13	5	60	10.8	0.00993347	0.955	1.06333	1.11344	2.0029
2408.1	tr|Q8SXU3|Q8SXU3_DROME	CG8207 OS=Drosophila melanogaster GN=CG8207 PE=2 SV=1	1	0.93	0.96	0.96	1.06	1.08	1.02	8	5	48	8.3	0.00996267	0.9625	1.05333	1.09437	2.00162
1079.1	tr|Q9V3C7|Q9V3C7_DROME	Inhibitor-2 OS=Drosophila melanogaster GN=I-2 PE=2 SV=1	1.03	1.05	1.03	1.01	0.93	0.99	0.96	27	2	23	58.8	0.010129	1.03	0.96	0.932039	1.99444
1998.1	tr|Q8SWW9|Q8SWW9_DROME	CG3156 OS=Drosophila melanogaster GN=EG:171D11.2 PE=2 SV=1	0.98	0.91	0.97	0.99	1.06	1.04	1.05	11	6	76	7.3	0.010191	0.9625	1.05	1.09091	1.99178
5148.1	tr|O61351|O61351_DROME	La costa OS=Drosophila melanogaster GN=lcs PE=2 SV=1	0.83	0.68	0.84	0.6	1.56	1.46	1.03	1	1	13	3.9	0.0102113	0.7375	1.35	1.83051	1.99092
4853.1	tr|Q9VSZ4|Q9VSZ4_DROME	CG3437 OS=Drosophila melanogaster GN=CG3437 PE=4 SV=2	0.99	0.95	0.98	0.94	1.04	1.08	1.02	1	1	41	1.2	0.0102876	0.965	1.04667	1.08463	1.98769
1073.1	tr|O18338|O18338_DROME	LD44762p OS=Drosophila melanogaster GN=Rab8 PE=2 SV=1	0.91	0.96	1	0.97	1.07	1.05	1.04	27	6	24	57	0.0103234	0.96	1.05333	1.09722	1.98618
2150.1	tr|Q9VJ14|Q9VJ14_DROME	LD11955p OS=Drosophila melanogaster GN=mib2 PE=2 SV=1	0.95	0.94	0.99	0.83	1.07	1.12	1.1	10	5	115	4.4	0.010338	0.9275	1.09667	1.18239	1.98556
3547.1	tr|Q9VP06|Q9VP06_DROME	CG11306 OS=Drosophila melanogaster GN=CG11306 PE=2 SV=2	0.86	0.86	0.8	0.92	1.15	1.36	1.05	3	3	55	2.8	0.0103593	0.86	1.18667	1.37984	1.98467
4481.1	sp|Q9NIP6|CP2B_DROME	Cardio acceleratory peptide 2b OS=Drosophila melanogaster GN=capa PE=1 SV=1	0.99	0.89	0.98	0.94	1.09	1.07	1.04	2	1	16	6.1	0.0108199	0.95	1.06667	1.12281	1.96578
1477.1	sp|Q24298|CADE_DROME	DE-cadherin OS=Drosophila melanogaster GN=shg PE=1 SV=2	0.99	0.92	0.99	0.96	1.05	1.04	1.04	17	12	170	5	0.0108235	0.965	1.04333	1.08117	1.96563
1416.1	tr|Q9VJZ5|Q9VJZ5_DROME	LD07294p OS=Drosophila melanogaster GN=Tap42 PE=2 SV=2	0.94	0.89	0.98	0.9	1.03	1.17	1.08	19	5	43	21.9	0.0108988	0.9275	1.09333	1.1788	1.96262
1020.1	sp|P32748-2|PYRD_DROME	Isoform B of Dihydroorotate dehydrogenase (quinone), mitochondrial OS=Drosophila melanogaster GN=Dhod	1.11	1	1.08	1.05	0.93	0.96	0.87	28	11	39	36	0.0109155	1.06	0.92	0.867925	1.96196
3539.1	tr|B7Z103|B7Z103_DROME	CG42323, isoform E OS=Drosophila melanogaster GN=CG42323 PE=4 SV=1	0.88	0.77	1.02	0.74	1.28	1.2	1.1	4	1	25	7.9	0.0110948	0.8525	1.19333	1.3998	1.95488
116.1	tr|Q9VM18|Q9VM18_DROME	CG5177 OS=Drosophila melanogaster GN=CG5177 PE=2 SV=1	0.96	0.91	1.01	0.95	1.06	1.04	1.08	232	13	31	371.4	0.0112368	0.9575	1.06	1.10705	1.94936
119.3	tr|Q9VMW2|Q9VMW2_DROME	RE38157p OS=Drosophila melanogaster GN=Rtnl1 PE=2 SV=1	0.98	0.92	0.99	0.98	1.03	1.05	1.06	173	8	23	382.7	0.0114713	0.9675	1.04667	1.08183	1.94039
5368.1	tr|Q9VPE6|Q9VPE6_DROME	CG32428, isoform A OS=Drosophila melanogaster GN=CG5145 PE=2 SV=2	0.61	0.53	0.56	1.14	1.43	1.32	1.4	1	1	22	2.3	0.011477	0.71	1.38333	1.94836	1.94017
5291.1	tr|Q9VCQ7|Q9VCQ7_DROME	LD40758p OS=Drosophila melanogaster GN=Rassf PE=2 SV=3	0.93	0.96	0.95	0.84	1.18	1.04	1.09	1	1	90	0.6	0.0115582	0.92	1.10333	1.19928	1.93711
4055.1	tr|Q9VWP1|Q9VWP1_DROME	CG7288 OS=Drosophila melanogaster GN=CG7288 PE=2 SV=2	0.91	0.98	0.96	0.99	1.07	1.05	1.03	2	2	57	1.7	0.0115833	0.96	1.05	1.09375	1.93617
846.1	tr|O18332|O18332_DROME	FI01544p OS=Drosophila melanogaster GN=Rab1 PE=2 SV=1	0.94	0.93	1.01	0.96	1.03	1.05	1.07	34	9	23	74.7	0.0115833	0.96	1.05	1.09375	1.93617
1492.1	sp|P54397|FKB39_DROME	39 kDa FK506-binding nuclear protein OS=Drosophila melanogaster GN=FK506-bp1 PE=1 SV=2	1.05	0.99	1.03	1.03	0.96	0.97	0.97	17	8	39	21.6	0.0119885	1.025	0.966667	0.943089	1.92124
4040.1	sp|Q9Y140|DHRS7_DROME	Dehydrogenase/reductase SDR family protein 7-like OS=Drosophila melanogaster GN=CG7601 PE=2 SV=1	0.86	0.65	0.93	0.76	1.34	1.04	1.43	2	2	36	2.8	0.0120489	0.8	1.27	1.5875	1.91905
3589.1	tr|Q7K0L7|Q7K0L7_DROME	CG6608, isoform A OS=Drosophila melanogaster GN=Tpc1 PE=2 SV=1	0.91	0.99	0.89	0.99	1.09	1.05	1.07	3	3	37	4.1	0.012169	0.945	1.07	1.13228	1.91474
729.1	sp|Q9VE01|C12A5_DROME	Probable cytochrome P450 12a5, mitochondrial OS=Drosophila melanogaster GN=Cyp12a5 PE=2 SV=1	0.96	0.83	1.01	0.86	1.13	1.08	1.13	40	15	61	32.6	0.0122285	0.915	1.11333	1.21676	1.91263
2666.1	sp|Q9VMS8|C4AC2_DROME	Probable cytochrome P450 4ac2 OS=Drosophila melanogaster GN=Cyp4ac2 PE=3 SV=3	0.99	0.94	0.98	0.92	1.1	1.02	1.07	7	3	58	6.1	0.012236	0.9575	1.06333	1.11053	1.91236
615.1	tr|Q9VGA0|Q9VGA0_DROME	Glutathione S transferase D9 OS=Drosophila melanogaster GN=GstD9 PE=2 SV=1	0.99	0.86	0.98	0.88	1.06	1.09	1.14	48	9	25	94.3	0.0122759	0.9275	1.09667	1.18239	1.91094
1511.1	tr|A4V4A1|A4V4A1_DROME	Klp10A, isoform B OS=Drosophila melanogaster GN=Klp10A PE=3 SV=1	0.96	0.89	0.98	0.94	1.13	1.08	1.02	17	7	89	9.6	0.0123008	0.9425	1.07667	1.14235	1.91007
2197.2	tr|Q9VA42|Q9VA42_DROME	Niemann-Pick type C-2g OS=Drosophila melanogaster GN=Npc2g PE=2 SV=1	0.9	0.98	0.93	0.94	1.06	1.16	1.03	7	3	17	20.1	0.0124686	0.9375	1.08333	1.15556	1.90418
2720.1	sp|Q03372|HMSH_DROME	Muscle segmentation homeobox OS=Drosophila melanogaster GN=Dr PE=2 SV=2	0.76	0.9	0.96	0.94	1.23	1.06	1.15	7	1	54	6.5	0.0124796	0.89	1.14667	1.28839	1.9038
564.1	sp|Q9V9X4|MTNA_DROME	Methylthioribose-1-phosphate isomerase OS=Drosophila melanogaster GN=CG11334 PE=2 SV=1	0.95	0.9	1	0.94	1.04	1.05	1.12	52	12	39	66.5	0.0125389	0.9475	1.07	1.12929	1.90174
4637.1	sp|Q9VRV7|PM14_DROME	Pre-mRNA branch site p14-like protein OS=Drosophila melanogaster GN=CG13298 PE=1 SV=1	1.07	1.01	1.02	1.04	0.98	0.92	0.96	1	1	14	3.5	0.0126766	1.035	0.953333	0.921095	1.897
802.1	tr|Q9VB05|Q9VB05_DROME	ALG-2 interacting protein X OS=Drosophila melanogaster GN=ALiX PE=2 SV=1	1.04	1.02	1.06	1.06	0.95	0.99	0.89	36	13	92	19.5	0.0127538	1.045	0.943333	0.902711	1.89436
4289.1	tr|C0PV74|C0PV74_DROME	MIP03712p OS=Drosophila melanogaster GN=Sclp PE=2 SV=1	1.13	1.03	1	1.1	0.93	0.94	0.87	2	2	20	5.1	0.0128312	1.065	0.913333	0.85759	1.89173
128.1	sp|Q9V521|PRPA3_DROME	Phenoloxidase subunit A3 OS=Drosophila melanogaster GN=proPo-A3 PE=1 SV=1	0.96	0.93	1.01	0.89	1.09	1.05	1.06	215	28	79	135.7	0.012957	0.9475	1.06667	1.12577	1.8875
5570.1	tr|Q86B55|Q86B55_DROME	Diacylglycerol lipase isoform D OS=Drosophila melanogaster GN=inaE PE=2 SV=1	0.92	0.89	1.02	0.87	1.08	1.06	1.15	1	1	84	0.6	0.013015	0.925	1.09667	1.18559	1.88556
5116.1	tr|Q9VA87|Q9VA87_DROME	CG9733 OS=Drosophila melanogaster GN=CG9733 PE=2 SV=1	0.73	0.7	0.99	0.86	1.38	1.06	1.28	1	1	47	1.1	0.0130746	0.82	1.24	1.5122	1.88357
4036.1	tr|Q8SZY9|Q8SZY9_DROME	CG32075 OS=Drosophila melanogaster GN=CG6316 PE=2 SV=1	1.01	1.11	1.01	1.08	0.91	0.96	0.92	2	2	62	1.6	0.013093	1.0525	0.93	0.88361	1.88296
5511.1	tr|A1Z977|A1Z977_DROME	CG33798 OS=Drosophila melanogaster GN=CG33798 PE=4 SV=1	0.78	0.71	0.99	0.94	1.22	1.09	1.27	1	1	21	2.4	0.0131449	0.855	1.19333	1.39571	1.88124
3103.1	sp|Q9Y0I1|EAF3_DROME	NuA4 complex subunit EAF3 homolog OS=Drosophila melanogaster GN=MRG15 PE=1 SV=1	0.91	0.93	0.78	1	1.19	1.1	1.1	5	3	47	5.3	0.0131631	0.905	1.13	1.24862	1.88064
4316.1	tr|Q0KHS8|Q0KHS8_DROME	Ether a go-go, isoform B OS=Drosophila melanogaster GN=eag PE=4 SV=1	0.94	0.94	0.98	0.95	1.11	1.08	1	2	2	136	0.7	0.0134804	0.9525	1.06333	1.11636	1.8703
5706.1	sp|P20193|SUV37_DROME	Protein suppressor of variegation 3-7 OS=Drosophila melanogaster GN=Su(var)3-7 PE=1 SV=4	0.96	0.96	0.91	0.98	1.03	1.12	1.04	1	1	140	0.4	0.0134804	0.9525	1.06333	1.11636	1.8703
2848.1	tr|Q9V3A0|Q9V3A0_DROME	CG8997 OS=Drosophila melanogaster GN=CG8997 PE=2 SV=1	0.99	0.87	0.96	0.92	1.09	1.14	1.03	6	3	28	10.7	0.0135621	0.935	1.08667	1.16221	1.86767
1864.1	tr|Q961B3|Q961B3_DROME	CG2277 OS=Drosophila melanogaster GN=CG2277 PE=2 SV=1	0.96	0.94	1	0.93	1.02	1.05	1.1	12	10	60	9.9	0.0139318	0.9575	1.05667	1.10357	1.85599
2704.1	sp|O18405|SURF4_DROME	Surfeit locus protein 4 homolog OS=Drosophila melanogaster GN=Surf4 PE=2 SV=1	1.04	1.01	1.04	1.05	0.91	0.99	0.96	7	2	31	11.5	0.0139407	1.035	0.953333	0.921095	1.85572
4112.1	sp|Q9VCG4|NDC1_DROME	Nucleoporin Ndc1 OS=Drosophila melanogaster GN=Ndc1 PE=1 SV=1	0.87	0.85	1.03	0.91	1.1	1.07	1.17	2	2	65	1.5	0.0141504	0.915	1.11333	1.21676	1.84923
2974.1	tr|Q9VRJ3|Q9VRJ3_DROME	CG4623 OS=Drosophila melanogaster GN=CG4623 PE=2 SV=1	0.93	0.91	1.01	0.94	1.09	1.02	1.1	5	4	38	6.7	0.0142275	0.9475	1.07	1.12929	1.84687
2723.1	sp|Q9W3C1|U202_DROME	Polycomb protein l(1)G0020 OS=Drosophila melanogaster GN=l(1)G0020 PE=1 SV=2	0.96	0.93	1.01	0.88	1.09	1.1	1.04	6	6	113	2.7	0.0142788	0.945	1.07667	1.13933	1.84531
5753.1	tr|Q7K087|Q7K087_DROME	CG17574, isoform A OS=Drosophila melanogaster GN=CG17574 PE=2 SV=1	0.92	0.75	0.85	0.92	1.13	1.37	1.07	1	1	17	3	0.0146423	0.86	1.19	1.38372	1.83439
5674.1	tr|Q8INT6|Q8INT6_DROME	Mlx interactor, isoform E OS=Drosophila melanogaster GN=Mio PE=2 SV=1	0.89	1.03	0.93	0.92	1.08	1.06	1.09	1	1	103	0.5	0.0146521	0.9425	1.07667	1.14235	1.8341
3130.1	tr|Q9W5W6|Q9W5W6_DROME	CG9578 OS=Drosophila melanogaster GN=CG9578 PE=2 SV=2	0.89	0.93	1.02	0.95	1.09	1.05	1.07	5	2	32	7.7	0.0148075	0.9475	1.07	1.12929	1.82952
4565.1	sp|Q9U1M2|TM120_DROME	Transmembrane protein 120 homolog OS=Drosophila melanogaster GN=CG32795 PE=1 SV=1	0.85	1.01	0.93	0.89	1.04	1.17	1.11	2	1	45	2.2	0.0148092	0.92	1.10667	1.2029	1.82947
1402.1	tr|Q8T4C5|Q8T4C5_DROME	AT04450p OS=Drosophila melanogaster GN=CG11891 PE=2 SV=1	1.11	1.03	1.12	1.04	0.92	0.97	0.81	19	7	49	19.5	0.01503	1.075	0.9	0.837209	1.82304
3268.1	tr|A1ZAQ4|A1ZAQ4_DROME	CG15611, isoform A OS=Drosophila melanogaster GN=CG15611 PE=4 SV=1	0.95	0.96	1.02	0.93	1.04	1.06	1.05	4	4	58	3.4	0.0150619	0.965	1.05	1.08808	1.82212
1630.1	tr|Q8IN51|Q8IN51_DROME	CG31205 OS=Drosophila melanogaster GN=CG31205 PE=3 SV=2	1.13	1.03	1.11	0.99	0.9	0.95	0.89	15	6	30	24.8	0.0154526	1.065	0.913333	0.85759	1.811
348.1	tr|Q9VAY2|Q9VAY2_DROME	Glycoprotein 93 OS=Drosophila melanogaster GN=Gp93 PE=2 SV=1	0.91	0.94	1.02	0.95	1.04	1.06	1.08	84	25	90	46.6	0.015577	0.955	1.06	1.10995	1.80752
3883.1	tr|A8JQZ7|A8JQZ7_DROME	Flyers-cup, isoform E OS=Drosophila melanogaster GN=f-cup PE=4 SV=1	0.99	0.99	0.92	0.87	1.11	1.1	1.04	3	2	70	2.1	0.0155971	0.9425	1.08333	1.14943	1.80696
119.2	tr|Q9VMW1|Q9VMW1_DROME	Rtnl1, isoform D OS=Drosophila melanogaster GN=Rtnl1 PE=2 SV=2	0.97	0.91	0.99	0.98	1.03	1.04	1.06	176	8	25	353.3	0.0156814	0.9625	1.04333	1.08398	1.80461
4482.1	tr|Q9VVA1|Q9VVA1_DROME	CG9706, isoform A OS=Drosophila melanogaster GN=CG9706 PE=2 SV=1	0.9	0.88	0.88	0.95	1.23	1.17	0.99	2	1	59	1.7	0.0157545	0.9025	1.13	1.25208	1.80259
629.1	tr|Q8IPN1|Q8IPN1_DROME	Transforming acidic coiled-coil protein, isoform A OS=Drosophila melanogaster GN=tacc PE=2 SV=1	0.97	0.9	1.01	0.92	1.1	1.05	1.05	46	21	136	16.9	0.0157554	0.95	1.06667	1.12281	1.80257
4735.1	tr|Q8SXR4|Q8SXR4_DROME	CG30339 OS=Drosophila melanogaster GN=CG30339 PE=2 SV=1	0.95	0.73	0.95	0.88	1.18	1.26	1.05	1	1	36	1.4	0.0159306	0.8775	1.16333	1.32574	1.79777
1958.1	sp|Q8MKL1|U598_DROME	UPF0598 protein CG30010 OS=Drosophila melanogaster GN=CG30010 PE=2 SV=1	1.01	0.89	0.98	0.93	1.08	1.06	1.06	12	2	20	30.5	0.01596	0.9525	1.06667	1.11986	1.79697
3212.1	sp|Q9W2U4|PP4R2_DROME	Serine/threonine-protein phosphatase 4 regulatory subunit 2 OS=Drosophila melanogaster GN=PPP4R2r PE=1 SV=2	0.9	0.92	1.01	0.98	1.05	1.06	1.09	4	4	67	3	0.01596	0.9525	1.06667	1.11986	1.79697
3615.1	tr|Q9VST4|Q9VST4_DROME	CG5144 OS=Drosophila melanogaster GN=CG5144 PE=1 SV=1	0.95	0.68	0.97	0.85	1.23	1.08	1.23	3	3	44	3.4	0.0159896	0.8625	1.18	1.36812	1.79616
1216.1	tr|Q9V3V2|Q9V3V2_DROME	Fkbp13, isoform A OS=Drosophila melanogaster GN=Fkbp13 PE=2 SV=1	0.96	0.94	1	0.93	1.01	1.07	1.1	23	6	24	48	0.016083	0.9575	1.06	1.10705	1.79363
1657.1	tr|Q9VG26|Q9VG26_DROME	CG31345 OS=Drosophila melanogaster GN=CG31345-RA PE=2 SV=2	0.97	0.97	0.99	0.99	1	1.04	1.04	15	4	24	31.1	0.0160857	0.98	1.02667	1.04762	1.79356
427.2	tr|E1JJR8|E1JJR8_DROME	Annexin X, isoform B OS=Drosophila melanogaster GN=AnnX PE=3 SV=1	1.01	0.9	0.98	0.92	1.05	1.08	1.06	52	13	36	72.9	0.0163389	0.9525	1.06333	1.11636	1.78678
5675.1	tr|B5RJS0|B5RJS0_DROME	CG42388, isoform E OS=Drosophila melanogaster GN=CG4040-RA PE=2 SV=1	0.96	0.82	0.94	0.98	1.16	1.07	1.07	1	1	139	0.4	0.0164926	0.925	1.1	1.18919	1.78271
4686.1	tr|B7Z0I7|B7Z0I7_DROME	CG42303 OS=Drosophila melanogaster GN=CG42303 PE=4 SV=1	0.93	0.95	0.91	0.97	1.01	1.16	1.07	1	1	41	1.2	0.0165484	0.94	1.08	1.14894	1.78124
4655.1	tr|Q9VTC2|Q9VTC2_DROME	CG14149 OS=Drosophila melanogaster GN=blos4 PE=2 SV=1	0.96	0.88	0.97	0.97	1.12	1.07	1.02	1	1	19	2.6	0.0165997	0.945	1.07	1.13228	1.7799
4175.1	tr|Q9V7W9|Q9V7W9_DROME	Nuclear inhibitor of protein phosphatase 1 OS=Drosophila melanogaster GN=NiPp1 PE=2 SV=1	1.23	1.13	1.16	1.04	1	0.77	0.69	2	2	43	2.4	0.016723	1.14	0.82	0.719298	1.77669
966.2	tr|Q7JRC3|Q7JRC3_DROME	Juvenile hormone epoxide hydrolase 1 OS=Drosophila melanogaster GN=Jheh1 PE=2 SV=1	0.94	0.94	1.02	0.97	1.05	1.05	1.04	18	10	55	16.4	0.0169633	0.9675	1.04667	1.08183	1.77049
5492.1	sp|Q27272|TAF9_DROME	Transcription initiation factor TFIID subunit 9 OS=Drosophila melanogaster GN=e(y)1 PE=1 SV=1	0.77	0.73	1.03	0.78	1.41	1.18	1.09	1	1	29	1.7	0.0170107	0.8275	1.22667	1.48238	1.76928
4310.1	tr|Q9VNB4|Q9VNB4_DROME	CG2663, isoform A OS=Drosophila melanogaster GN=CG2663 PE=2 SV=1	0.91	0.77	0.96	0.93	1.16	1.03	1.24	2	2	35	2.8	0.0170775	0.8925	1.14333	1.28105	1.76758
966.1	tr|Q7KB18|Q7KB18_DROME	FI02870p OS=Drosophila melanogaster GN=Jheh2 PE=2 SV=1	1.01	0.91	0.98	0.92	1.04	1.06	1.08	30	8	52	28.9	0.0172245	0.955	1.06	1.10995	1.76385
5426.1	tr|Q8ING1|Q8ING1_DROME	CG31327 OS=Drosophila melanogaster GN=CG31327 PE=2 SV=1	0.84	0.75	1	0.9	1.08	1.3	1.12	1	1	98	0.5	0.0172807	0.8725	1.16667	1.33715	1.76244
3020.1	tr|Q9VRX8|Q9VRX8_DROME	CG8398, isoform A OS=Drosophila melanogaster GN=CG8398 PE=2 SV=2	0.93	0.86	0.99	0.99	1.07	1.07	1.07	5	4	61	4.1	0.0175707	0.9425	1.07	1.13528	1.75521
2134.1	tr|Q8STB9|Q8STB9_DROME	Dystroglycan type II OS=Drosophila melanogaster GN=Dg PE=2 SV=1	0.95	0.91	0.97	0.97	1.01	1.13	1.06	10	6	111	4.5	0.017772	0.95	1.06667	1.12281	1.75026
5546.1	tr|Q9VEW5|Q9VEW5_DROME	CG14879, isoform A OS=Drosophila melanogaster GN=CG14879 PE=1 SV=1	1.1	1	1.05	1.12	0.95	0.94	0.82	1	1	20	2.5	0.0177741	1.0675	0.903333	0.846214	1.75021
1499.1	sp|Q9VFM9|TWF_DROME	Twinfilin OS=Drosophila melanogaster GN=twf PE=1 SV=1	0.95	0.88	0.98	0.97	1.07	1.02	1.12	17	7	39	21.8	0.0177812	0.945	1.07	1.13228	1.75004
4989.1	tr|Q9VDF8|Q9VDF8_DROME	CG31189 OS=Drosophila melanogaster GN=CG31189 PE=4 SV=4	0.8	0.86	1.05	0.81	1.2	1.06	1.22	1	1	30	1.7	0.0178435	0.88	1.16	1.31818	1.74852
4688.1	tr|Q9VY27|Q9VY27_DROME	Nucleoside diphosphate kinase OS=Drosophila melanogaster GN=nmdyn-D6 PE=2 SV=2	1.15	1	1.1	1.08	0.96	0.92	0.8	1	1	17	2.9	0.0179389	1.0825	0.893333	0.82525	1.74621
10.2	sp|P22700|ATC1_DROME	Calcium-transporting ATPase sarcoplasmic/endoplasmic reticulum type OS=Drosophila melanogaster GN=Ca-P60A PE=1 SV=2	1.01	0.89	0.97	0.94	1.08	1.05	1.05	2133	42	112	955.4	0.0180462	0.9525	1.06	1.11286	1.74361
486.1	tr|Q9VIX2|Q9VIX2_DROME	LD06038p OS=Drosophila melanogaster GN=Pax PE=2 SV=3	0.97	0.95	1.01	0.94	1.08	1.03	1.03	61	10	65	47.2	0.0184507	0.9675	1.04667	1.08183	1.73399
3608.1	sp|Q9VTX8|ODR4_DROME	Protein odr-4 homolog OS=Drosophila melanogaster GN=CG10616 PE=1 SV=2	0.98	0.84	0.98	0.96	1.08	1.06	1.1	3	3	55	2.8	0.0189271	0.94	1.08	1.14894	1.72292
3578.1	tr|Q9VBX8|Q9VBX8_DROME	CG33096, isoform C OS=Drosophila melanogaster GN=CG33096 PE=2 SV=2	0.89	0.94	0.97	0.91	1.21	1.05	1.04	3	3	32	4.6	0.0189484	0.9275	1.1	1.18598	1.72243
4692.1	tr|Q9VLE1|Q9VLE1_DROME	CG13108 OS=Drosophila melanogaster GN=CG13108 PE=2 SV=1	1.15	0.99	1.04	1.08	0.96	0.89	0.89	1	1	27	1.9	0.0190654	1.065	0.913333	0.85759	1.71975
4716.1	tr|Q9VXT0|Q9VXT0_DROME	CG8097 OS=Drosophila melanogaster GN=CG8097 PE=2 SV=1	1.05	0.59	0.83	0.81	1.35	1.14	1.22	1	1	51	1	0.019179	0.82	1.23667	1.50813	1.71717
3558.1	tr|Q9VTX2|Q9VTX2_DROME	RE32936p OS=Drosophila melanogaster GN=Smyd4 PE=2 SV=1	1.06	1.1	1.1	1.15	0.98	0.9	0.71	3	3	74	2	0.0193591	1.1025	0.863333	0.783069	1.71311
2075.1	sp|Q4V5I9|SDF2A_DROME	Succinate dehydrogenase assembly factor 2-A, mitochondrial OS=Drosophila melanogaster GN=CG14757 PE=2 SV=1	0.86	0.88	0.94	0.93	1.07	1.04	1.28	11	1	19	28.7	0.0195286	0.9025	1.13	1.25208	1.70933
3008.1	tr|Q9VGS9|Q9VGS9_DROME	LD21102p OS=Drosophila melanogaster GN=Ugt35a PE=2 SV=1	0.94	0.84	0.96	0.89	1.04	1.08	1.26	5	4	61	4.1	0.0197777	0.9075	1.12667	1.24151	1.70382
1564.1	tr|Q9VDF4|Q9VDF4_DROME	Cortactin OS=Drosophila melanogaster GN=Cortactin PE=2 SV=1	0.92	0.92	0.97	1.01	1.02	1.09	1.07	16	7	61	13.1	0.0197979	0.955	1.06	1.10995	1.70338
219.1	sp|Q24400|MLP2_DROME	Muscle LIM protein Mlp84B OS=Drosophila melanogaster GN=Mlp84B PE=1 SV=1	0.96	0.97	0.99	0.99	1.05	1.04	1	124	8	53	115.9	0.0197979	0.9775	1.03	1.05371	1.70338
1773.1	tr|Q9VCF2|Q9VCF2_DROME	CG31140, isoform A OS=Drosophila melanogaster GN=CG31140 PE=2 SV=2	0.9	0.92	1.04	0.91	1.11	1.06	1.07	13	10	172	3.8	0.0199046	0.9425	1.08	1.14589	1.70105
2178.1	tr|B7YZV3|B7YZV3_DROME	Phosphodiesterase 1c, isoform F OS=Drosophila melanogaster GN=Pde1c PE=4 SV=1	0.94	0.93	0.95	1.02	1.02	1.07	1.08	10	4	116	4.3	0.0199628	0.96	1.05667	1.10069	1.69978
1160.1	tr|Q0KI98|Q0KI98_DROME	FI06027p OS=Drosophila melanogaster GN=Aats-trp PE=2 SV=1	0.99	0.93	1	0.97	1.03	1.05	1.03	24	9	48	25	0.0202926	0.9725	1.03667	1.06598	1.69266
4438.1	sp|Q9VSF3|UBC12_DROME	NEDD8-conjugating enzyme Ubc12 OS=Drosophila melanogaster GN=CG7375 PE=1 SV=1	0.82	0.97	0.95	0.93	1.05	1.07	1.21	2	1	21	4.8	0.0208207	0.9175	1.11	1.20981	1.6815
4590.1	tr|Q9W1J2|Q9W1J2_DROME	CG4797, isoform A OS=Drosophila melanogaster GN=CG4797 PE=2 SV=1	1.02	0.91	0.94	0.81	1.16	1.07	1.09	2	1	51	2	0.0209663	0.92	1.10667	1.2029	1.67848
4768.1	tr|Q8MKK1|Q8MKK1_DROME	CG30185 OS=Drosophila melanogaster GN=CG30185;Gr59f PE=2 SV=1	1.09	1.04	1.02	1.1	0.98	0.94	0.83	1	1	20	2.5	0.0210161	1.0625	0.916667	0.862745	1.67745
4577.1	tr|Q9VVZ6|Q9VVZ6_DROME	CG12519 OS=Drosophila melanogaster GN=CG18294 PE=2 SV=2	1	0.85	0.98	0.92	1.11	1.1	1.04	2	1	13	7.9	0.0210161	0.9375	1.08333	1.15556	1.67745
3612.1	sp|Q9VKH6|PPT2_DROME	Lysosomal thioesterase PPT2 homolog OS=Drosophila melanogaster GN=Ppt2 PE=2 SV=1	1.01	0.95	0.86	0.88	1.13	1.14	1.02	3	3	33	4.6	0.0210921	0.925	1.09667	1.18559	1.67588
594.1	tr|Q8SZN1|Q8SZN1_DROME	CG31313 OS=Drosophila melanogaster GN=CG31313 PE=2 SV=1	0.98	0.86	1.02	0.82	1.11	1.1	1.11	50	4	14	184.9	0.0212494	0.92	1.10667	1.2029	1.67265
625.1	sp|Q9VC57|ATLAS_DROME	Atlastin OS=Drosophila melanogaster GN=atl PE=1 SV=1	0.97	0.9	1	0.92	1.09	1.01	1.1	47	12	61	38.6	0.0213514	0.9475	1.06667	1.12577	1.67057
598.1	tr|Q9VN86|Q9VN86_DROME	AT14148p OS=Drosophila melanogaster GN=CG2604 PE=2 SV=1	0.98	0.92	1.01	0.88	1.07	1.05	1.07	49	12	47	51.9	0.0214052	0.9475	1.06333	1.12225	1.66948
1453.1	sp|P08646|RAS1_DROME	Ras-like protein 1 OS=Drosophila melanogaster GN=Ras85D PE=1 SV=2	0.98	0.92	1	0.93	1.05	1.02	1.1	18	6	22	41.7	0.0214825	0.9575	1.05667	1.10357	1.66792
443.1	tr|Q8INW5|Q8INW5_DROME	CG10237, isoform C OS=Drosophila melanogaster GN=CG10237-RC PE=2 SV=1	1	0.88	1	0.89	1.08	1.08	1.06	68	10	36	95.2	0.0216749	0.9425	1.07333	1.13882	1.66404
5140.1	tr|Q0E981|Q0E981_DROME	CG8485, isoform A OS=Drosophila melanogaster GN=CG8485 PE=2 SV=1	0.83	0.89	0.97	0.98	1.21	1.04	1.09	1	1	96	0.5	0.0216777	0.9175	1.11333	1.21344	1.66399
4741.1	tr|Q8T8S1|Q8T8S1_DROME	AT31457p OS=Drosophila melanogaster GN=CG13322 PE=2 SV=1	0.88	0.89	1.01	0.97	1.04	1.13	1.07	1	1	38	1.3	0.0217008	0.9375	1.08	1.152	1.66352
471.1	tr|Q9VCV9|Q9VCV9_DROME	CG6972 OS=Drosophila melanogaster GN=CG6972 PE=1 SV=1	0.98	0.93	1.01	0.96	1.06	1.05	1.02	64	9	34	94.3	0.0217884	0.97	1.04333	1.0756	1.66177
3662.1	tr|Q5BI62|Q5BI62_DROME	LP14331p OS=Drosophila melanogaster GN=Mdr50 PE=2 SV=1	0.95	0.73	0.94	0.93	1.09	1.09	1.27	3	3	145	1	0.0219372	0.8875	1.15	1.29577	1.65882
1919.1	tr|Q9XZ53|Q9XZ53_DROME	Oligosaccharyl transferase 3 OS=Drosophila melanogaster GN=OstStt3 PE=1 SV=1	0.93	0.81	1.03	0.86	1.17	1.04	1.18	12	5	88	6.8	0.0219872	0.9075	1.13	1.24518	1.65783
1645.1	sp|Q9U9P7|PITC1_DROME	Cytoplasmic phosphatidylinositol transfer protein 1 OS=Drosophila melanogaster GN=rdgBbeta PE=2 SV=1	0.94	0.96	1.01	0.95	1.05	1.01	1.08	15	5	32	23.6	0.0223522	0.965	1.04667	1.08463	1.65068
4762.1	sp|Q7JUR6|GDAP2_DROME	Protein GDAP2 homolog OS=Drosophila melanogaster GN=CG18812 PE=2 SV=1	1.02	0.93	0.95	0.9	1.05	1.04	1.12	1	1	61	0.8	0.0223969	0.95	1.07	1.12632	1.64981
2053.1	tr|Q8IMU2|Q8IMU2_DROME	CG11790, isoform B OS=Drosophila melanogaster GN=CG11790 PE=2 SV=1	0.97	0.92	0.97	0.92	1.13	0.99	1.11	11	4	27	20.3	0.0224012	0.945	1.07667	1.13933	1.64973
32.1	sp|Q24498-5|RY44_DROME	Isoform D of Ryanodine receptor 44F OS=Drosophila melanogaster GN=Rya-r44F	1	0.94	0.98	0.97	1.07	1.04	1.01	919	152	579	79.3	0.0224486	0.9725	1.04	1.06941	1.64881
2632.1	tr|Q9VQ39|Q9VQ39_DROME	CG31937 OS=Drosophila melanogaster GN=CG31937 PE=2 SV=1	0.92	0.9	1.03	0.93	1.11	1.04	1.06	7	4	36	9.8	0.0227617	0.945	1.07	1.13228	1.6428
1597.1	tr|Q9VBT7|Q9VBT7_DROME	CG10513 OS=Drosophila melanogaster GN=CG10513 PE=2 SV=2	0.89	1.03	0.9	0.94	1.13	1.05	1.06	15	9	49	15.3	0.0229398	0.94	1.08	1.14894	1.63941
295.1	tr|Q7JXB5|Q7JXB5_DROME	CG10924, isoform A OS=Drosophila melanogaster GN=CG10924 PE=2 SV=1	0.98	0.9	1	0.97	1.06	1.03	1.06	95	19	71	67.2	0.0231052	0.9625	1.05	1.09091	1.63629
620.1	tr|Q7KVX5|Q7KVX5_DROME	Vap-33-1, isoform A OS=Drosophila melanogaster GN=Vap-33-1 PE=2 SV=1	1.01	0.96	0.98	0.96	1.01	1.04	1.04	48	6	27	89.7	0.0233999	0.9775	1.03	1.05371	1.63079
2467.1	tr|Q94521|Q94521_DROME	Dopamine N acetyltransferase, isoform B OS=Drosophila melanogaster GN=Dat PE=2 SV=1	0.83	0.92	0.99	0.97	1.16	1.1	1.03	8	4	31	12.9	0.0236153	0.9275	1.09667	1.18239	1.62681
5512.1	tr|Q2PDQ6|Q2PDQ6_DROME	CG34035 OS=Drosophila melanogaster GN=CG34035 PE=4 SV=1	1.26	1.07	1.08	1.23	1.02	0.72	0.62	1	1	23	2.1	0.0237749	1.16	0.786667	0.678161	1.62388
3543.1	sp|Q9W358|RIC8_DROME	Synembryn OS=Drosophila melanogaster GN=ric8a PE=1 SV=2	0.89	0.91	1.01	0.86	1.1	1.02	1.21	3	3	66	2.3	0.0237976	0.9175	1.11	1.20981	1.62347
1507.1	tr|Q9VNP2|Q9VNP2_DROME	Neuromusculin, isoform A OS=Drosophila melanogaster GN=nrm PE=4 SV=4	0.93	0.95	0.99	0.97	1.04	1.01	1.11	17	7	122	7	0.0238482	0.96	1.05333	1.09722	1.62254
867.1	tr|Q9VSU2|Q9VSU2_DROME	Tequila, isoform A OS=Drosophila melanogaster GN=Tequila PE=2 SV=3	0.99	0.89	0.99	0.84	1.03	1.13	1.12	33	13	308	5.3	0.0238502	0.9275	1.09333	1.1788	1.62251
5345.1	tr|Q9VKV6|Q9VKV6_DROME	CG5337 OS=Drosophila melanogaster GN=CG5337-RA PE=2 SV=2	0.9	0.87	1.01	0.94	1.02	1.17	1.09	1	1	81	0.6	0.0238722	0.93	1.09333	1.17563	1.62211
2573.1	sp|Q24368|ISWI_DROME	Chromatin-remodeling complex ATPase chain Iswi OS=Drosophila melanogaster GN=Iswi PE=1 SV=1	0.93	0.97	1.01	0.95	1.07	1.06	1.01	7	5	119	3	0.0238722	0.965	1.04667	1.08463	1.62211
2239.1	sp|Q9VH78|ALG12_DROME	Probable Dol-P-Man:Man(7)GlcNAc(2)-PP-Dol alpha-1,6-mannosyltransferase OS=Drosophila melanogaster GN=CG8412 PE=2 SV=1	0.96	0.88	1.02	0.95	1.06	1.05	1.08	9	6	77	5.9	0.0242428	0.9525	1.06333	1.11636	1.61542
4164.1	tr|Q9W450|Q9W450_DROME	FI03335p OS=Drosophila melanogaster GN=Grip PE=2 SV=2	1	0.93	0.94	0.94	1.12	1.07	1	2	2	112	0.9	0.0242428	0.9525	1.06333	1.11636	1.61542
4573.1	tr|A4V3L8|A4V3L8_DROME	CG7816, isoform D OS=Drosophila melanogaster GN=CG7816 PE=4 SV=1	0.94	0.84	0.87	0.93	1.09	1.3	1.02	2	1	39	2.6	0.0244178	0.895	1.13667	1.27002	1.61229
960.1	tr|A1Z7P1|A1Z7P1_DROME	Phosphomannomutase 45A, isoform A OS=Drosophila melanogaster GN=Pmm45A PE=3 SV=1	0.92	0.93	1.03	0.95	1.05	1.04	1.08	30	10	70	21.5	0.0245707	0.9575	1.05667	1.10357	1.60958
5207.1	sp|O16844|COS_DROME	Kinesin-like protein costa OS=Drosophila melanogaster GN=cos PE=1 SV=2	0.73	0.83	1.04	0.85	1.23	1.29	1.03	1	1	133	0.4	0.0245849	0.8625	1.18333	1.37198	1.60933
344.1	tr|A1Z876|A1Z876_DROME	Nidogen/entactin, isoform B OS=Drosophila melanogaster GN=Ndg PE=4 SV=1	0.98	0.96	0.98	0.97	1.05	1.06	0.99	85	20	151	28.1	0.0246065	0.9725	1.03333	1.06255	1.60895
4434.1	tr|Q9W0U6|Q9W0U6_DROME	CG7049 OS=Drosophila melanogaster GN=CG7049 PE=1 SV=1	0.95	0.91	0.95	0.96	1.06	1.16	1	2	1	39	2.6	0.0246369	0.9425	1.07333	1.13882	1.60841
4883.1	sp|Q9VP65|TR112_DROME	TRM112-like protein OS=Drosophila melanogaster GN=CG12975 PE=2 SV=1	1.23	0.58	0.47	0.56	1.49	1.39	1.28	1	1	14	3.6	0.0246918	0.71	1.38667	1.95305	1.60745
1504.1	tr|Q9VBR6|Q9VBR6_DROME	CG11909 OS=Drosophila melanogaster GN=tobi PE=2 SV=1	1.03	0.92	0.91	0.72	1.13	1.17	1.12	17	7	75	11.4	0.0247291	0.895	1.14	1.27374	1.60679
3701.1	tr|A8WHL4|A8WHL4_DROME	Bonus, isoform B OS=Drosophila melanogaster GN=bon PE=2 SV=1	0.91	0.78	0.83	1.06	1.13	1.2	1.09	3	3	121	1.2	0.0247291	0.895	1.14	1.27374	1.60679
1693.1	tr|Q9VGT0|Q9VGT0_DROME	GH11333p OS=Drosophila melanogaster GN=Ugt35b PE=2 SV=1	0.93	1	0.95	0.96	1.02	1.03	1.11	14	8	58	12	0.025031	0.96	1.05333	1.09722	1.60152
808.1	tr|Q9VI64|Q9VI64_DROME	CG10098 OS=Drosophila melanogaster GN=CG10098 PE=2 SV=1	0.96	0.94	1.02	0.97	1.04	1.04	1.03	36	9	37	48	0.0251886	0.9725	1.03667	1.06598	1.5988
4512.1	tr|Q9W3N7|Q9W3N7_DROME	CG18624, isoform A OS=Drosophila melanogaster GN=CG18624-RA PE=2 SV=1	1.01	1.13	1.2	1.06	0.98	0.87	0.75	2	1	6	16.1	0.0254129	1.1	0.866667	0.787879	1.59495
1435.1	tr|Q9VC63|Q9VC63_DROME	CG5789 OS=Drosophila melanogaster GN=CG5789 PE=2 SV=2	1.01	0.91	0.99	0.94	1.07	1.03	1.06	18	12	157	5.7	0.0254699	0.9625	1.05333	1.09437	1.59397
4533.1	sp|P18490|PCX_DROME	Protein pecanex OS=Drosophila melanogaster GN=pcx PE=2 SV=3	0.9	0.82	0.97	0.95	1.24	1.02	1.1	2	1	367	0.3	0.0255027	0.91	1.12	1.23077	1.59341
1576.1	sp|P56079|CDSA_DROME	Phosphatidate cytidylyltransferase, photoreceptor-specific OS=Drosophila melanogaster GN=CdsA PE=1 SV=2	0.88	0.99	0.98	0.97	1.06	1.1	1.03	16	5	51	15.5	0.0255058	0.955	1.06333	1.11344	1.59336
3219.1	tr|Q8SYC4|Q8SYC4_DROME	CG13893 OS=Drosophila melanogaster GN=CG13893 PE=2 SV=1	0.8	0.96	0.94	0.88	1.09	1.04	1.3	4	4	48	4.2	0.0256278	0.895	1.14333	1.27747	1.59129
3182.1	tr|Q9VYS9|Q9VYS9_DROME	CG10352 OS=Drosophila melanogaster GN=CG10352 PE=2 SV=2	0.99	0.88	1.01	0.83	1.1	1.13	1.06	5	1	35	7.2	0.0257818	0.9275	1.09667	1.18239	1.58869
2321.1	tr|Q9VGA1|Q9VGA1_DROME	Glutathione S transferase D10 OS=Drosophila melanogaster GN=GstD10 PE=1 SV=1	0.74	0.97	0.9	0.93	1.08	1.3	1.08	9	3	25	18.3	0.0257906	0.885	1.15333	1.3032	1.58854
4575.1	tr|Q8IH57|Q8IH57_DROME	GH10249p OS=Drosophila melanogaster GN=Vmat PE=2 SV=1	0.86	0.98	1	0.96	1.08	1.06	1.06	2	1	69	1.5	0.0257964	0.95	1.06667	1.12281	1.58844
2451.1	tr|Q9VI66|Q9VI66_DROME	CG31248 OS=Drosophila melanogaster GN=CG2640 PE=2 SV=2	0.97	0.96	1	0.97	1.02	1.07	1.01	8	4	29	13.9	0.0257964	0.975	1.03333	1.05983	1.58844
2353.1	tr|Q9VQG0|Q9VQG0_DROME	LD21546p OS=Drosophila melanogaster GN=Trn-SR PE=2 SV=2	1	0.97	0.99	0.99	1.01	1.01	1.03	8	7	106	3.8	0.0257964	0.9875	1.01667	1.02954	1.58844
5229.1	tr|Q9VUU8|Q9VUU8_DROME	CG15715 OS=Drosophila melanogaster GN=CG15715-RA PE=2 SV=1	0.83	0.64	0.94	0.85	1.28	0.99	1.46	1	1	9	5.7	0.0258567	0.815	1.24333	1.52556	1.58743
1294.1	tr|Q8IPZ3|Q8IPZ3_DROME	CG17221, isoform A OS=Drosophila melanogaster GN=CG17221 PE=2 SV=1	0.94	0.95	1	0.88	1.08	1.01	1.14	21	6	44	23.6	0.025936	0.9425	1.07667	1.14235	1.5861
1482.1	tr|O61444|O61444_DROME	MAP kinase kinase 4, isoform A OS=Drosophila melanogaster GN=Mkk4 PE=2 SV=1	0.92	0.9	1.02	0.94	1.12	1.1	1.01	17	9	48	17.9	0.0259547	0.945	1.07667	1.13933	1.58578
2966.1	sp|Q9VUL1|PYRG_DROME	CTP synthase OS=Drosophila melanogaster GN=CG6854 PE=1 SV=2	0.92	0.9	1.02	0.94	1.1	1.01	1.1	5	5	69	3.6	0.0260564	0.945	1.07	1.13228	1.58409
3621.1	tr|Q9VBK9|Q9VBK9_DROME	CG5913 OS=Drosophila melanogaster GN=CG5913 PE=1 SV=1	1.18	1.01	1.1	1.08	0.92	0.96	0.74	3	3	50	3	0.0260842	1.0925	0.873333	0.79939	1.58362
3133.1	tr|Q9VL66|Q9VL66_DROME	CG4592 OS=Drosophila melanogaster GN=CG4592-RA PE=2 SV=2	0.96	0.86	1.01	0.93	1.14	1.05	1.05	5	2	32	7.8	0.0260958	0.94	1.08	1.14894	1.58343
5366.1	tr|Q9VVX6|Q9VVX6_DROME	Bet1, isoform A OS=Drosophila melanogaster GN=Bet1 PE=2 SV=1	0.86	0.92	0.94	0.99	1.03	1.06	1.2	1	1	13	3.8	0.026148	0.9275	1.09667	1.18239	1.58256
3765.1	tr|Q9VD30|Q9VD30_DROME	CG7077 OS=Drosophila melanogaster GN=CG7077 PE=2 SV=1	1.03	0.84	0.94	0.9	1.1	1.04	1.15	3	2	27	5.5	0.026148	0.9275	1.09667	1.18239	1.58256
1572.1	sp|Q9VXB0|NECAP_DROME	NECAP-like protein CG9132 OS=Drosophila melanogaster GN=CG9132 PE=2 SV=1	0.91	0.95	1.03	0.93	1.07	1.03	1.08	16	6	27	30.1	0.0262149	0.955	1.06	1.10995	1.58145
417.1	tr|Q5BIA9|Q5BIA9_DROME	CG8613 OS=Drosophila melanogaster GN=CG8613 PE=2 SV=1	0.99	0.92	1.01	0.92	1.08	1.04	1.04	71	15	92	38.6	0.0262298	0.96	1.05333	1.09722	1.58121
427.1	sp|P22465|ANX10_DROME	Annexin-B10 OS=Drosophila melanogaster GN=AnnX PE=2 SV=2	1.01	0.91	0.99	0.93	1.06	1.07	1.03	70	13	36	98.4	0.0262298	0.96	1.05333	1.09722	1.58121
2119.1	sp|Q9GYV5|NEMO_DROME	NF-kappa-B essential modulator OS=Drosophila melanogaster GN=key PE=1 SV=1	0.95	0.84	1.03	0.93	1.07	1.1	1.08	10	6	44	11.4	0.0262896	0.9375	1.08333	1.15556	1.58022
108.1	tr|A4V1F9|A4V1F9_DROME	Ubiquitin-63E, isoform C OS=Drosophila melanogaster GN=Ubi-p63E PE=4 SV=1	0.91	0.87	1.01	0.97	1.11	1.1	1.02	263	5	86	153.4	0.0263095	0.94	1.07667	1.14539	1.57989
1281.1	tr|E1JIJ8|E1JIJ8_DROME	Acetylcholine esterase, isoform B OS=Drosophila melanogaster GN=Ace PE=4 SV=1	1.03	0.93	0.97	0.93	1.06	1.06	1.04	21	8	72	14.6	0.0269017	0.965	1.05333	1.09154	1.57022
5003.1	sp|Q9NIV1|E2AK3_DROME	Eukaryotic translation initiation factor 2-alpha kinase OS=Drosophila melanogaster GN=PEK PE=1 SV=2	0.94	0.8	0.96	0.96	1.03	1.1	1.22	1	1	131	0.4	0.0269735	0.915	1.11667	1.2204	1.56906
232.1	tr|A1Z7H3|A1Z7H3_DROME	Lethal (2) 44DEa, isoform C OS=Drosophila melanogaster GN=Acsl PE=4 SV=1	0.93	0.97	1.01	0.98	1.04	1.02	1.06	113	23	79	71.2	0.0269827	0.9725	1.04	1.06941	1.56891
236.1	sp|Q27597|NCPR_DROME	NADPH--cytochrome P450 reductase OS=Drosophila melanogaster GN=Cpr PE=2 SV=2	1.01	0.94	0.99	0.94	1.03	1.03	1.06	112	17	76	73.4	0.0271726	0.97	1.04	1.07216	1.56587
1248.1	tr|Q9W4A6|Q9W4A6_DROME	CG42492, isoform A OS=Drosophila melanogaster GN=CG11473 PE=2 SV=1	0.99	0.89	1.01	0.91	1.1	1.06	1.04	22	7	99	11.1	0.027346	0.95	1.06667	1.12281	1.56311
444.1	tr|Q7KMM4|Q7KMM4_DROME	BcDNA.GH04962 OS=Drosophila melanogaster GN=BcDNA.GH04962 PE=2 SV=1	0.94	0.89	1.03	0.94	1.08	1.09	1.03	67	23	106	31.7	0.027346	0.95	1.06667	1.12281	1.56311
251.1	tr|Q9VZW7|Q9VZW7_DROME	CG2107 OS=Drosophila melanogaster GN=CG2107 PE=1 SV=1	0.98	0.9	1.02	0.93	1.06	1.04	1.07	107	21	75	71.3	0.0277738	0.9575	1.05667	1.10357	1.55636
253.1	sp|Q9V9S8|HEMH_DROME	Ferrochelatase, mitochondrial OS=Drosophila melanogaster GN=Fech PE=2 SV=1	0.94	0.91	1.01	0.97	1.01	1.07	1.09	106	16	44	121.6	0.0277738	0.9575	1.05667	1.10357	1.55636
2198.1	tr|A1Z9D9|A1Z9D9_DROME	Bb in a boxcar, isoform A OS=Drosophila melanogaster GN=bbc PE=3 SV=1	0.87	0.87	1	0.9	1.12	1	1.24	10	2	46	10.8	0.027897	0.91	1.12	1.23077	1.55444
214.1	tr|Q3YMU0|Q3YMU0_DROME	ERp60 (Fragment) OS=Drosophila melanogaster GN=ERp60 PE=2 SV=1	0.99	0.89	1.01	0.91	1.08	1.03	1.09	126	20	55	113.8	0.0281298	0.95	1.06667	1.12281	1.55083
5535.1	tr|A8JR82|A8JR82_DROME	CG31158, isoform C OS=Drosophila melanogaster GN=CG31158 PE=4 SV=1	0.97	0.94	0.99	0.92	1.06	1.12	1	1	1	155	0.3	0.0281395	0.955	1.06	1.10995	1.55068
4679.1	tr|Q9VQR5|Q9VQR5_DROME	CG15414 OS=Drosophila melanogaster GN=CG15414 PE=2 SV=1	1.2	1.09	1.13	1.13	0.81	1.03	0.61	1	1	33	1.5	0.0282664	1.1375	0.816667	0.717949	1.54873
3631.1	sp|Q9VS46|RINT1_DROME	RINT1-like protein OS=Drosophila melanogaster GN=CG8605 PE=1 SV=2	1.01	0.9	0.97	0.96	1.06	1.08	1.02	3	3	83	1.8	0.028672	0.96	1.05333	1.09722	1.54254
3148.1	tr|Q9VG06|Q9VG06_DROME	CG17327, isoform A OS=Drosophila melanogaster GN=CG17327-RA PE=2 SV=2	0.99	0.98	0.99	0.98	1	1.05	1.02	5	2	15	16.7	0.0288894	0.985	1.02333	1.03892	1.53926
1561.1	tr|Q9VSL2|Q9VSL2_DROME	CG6776 OS=Drosophila melanogaster GN=CG6776 PE=2 SV=1	1.07	1.03	1.1	1	0.91	0.89	1	16	7	28	28.9	0.0289194	1.05	0.933333	0.888889	1.53881
3863.1	tr|Q7JWU9|Q7JWU9_DROME	AT07420p OS=Drosophila melanogaster GN=CG14480 PE=2 SV=1	0.97	0.9	0.97	0.73	1.26	1.08	1.09	3	2	28	5.3	0.0292541	0.8925	1.14333	1.28105	1.53381
249.2	sp|P54351|NSF2_DROME	Vesicle-fusing ATPase 2 OS=Drosophila melanogaster GN=Nsf2 PE=2 SV=2	0.98	0.94	0.99	0.99	1.03	1.07	1.01	50	22	83	30	0.0293136	0.975	1.03667	1.06325	1.53293
1749.1	tr|A1ZAA9|A1ZAA9_DROME	CG10731 OS=Drosophila melanogaster GN=CG10731 PE=4 SV=1	0.97	0.95	1.02	0.94	1.06	1.02	1.04	14	3	23	30.9	0.0293604	0.97	1.04	1.07216	1.53224
1163.1	tr|Q8SXC0|Q8SXC0_DROME	CG5577 OS=Drosophila melanogaster GN=CG5577 PE=2 SV=1	1.06	0.87	0.88	0.81	1.05	1.13	1.19	24	8	35	34.6	0.0293783	0.905	1.12333	1.24125	1.53197
2873.1	tr|Q7KK54|Q7KK54_DROME	MIP07328p OS=Drosophila melanogaster GN=Sema-1b PE=2 SV=1	0.95	0.88	0.98	0.97	1.13	1.08	1	6	3	85	3.5	0.0294701	0.945	1.07	1.13228	1.53062
5320.1	tr|Q9VEW6|Q9VEW6_DROME	IP01015p OS=Drosophila melanogaster GN=pad PE=2 SV=2	0.86	0.98	0.97	0.96	1.05	1.14	1.03	1	1	100	0.5	0.0295893	0.9425	1.07333	1.13882	1.52886
1246.1	tr|Q9VY04|Q9VY04_DROME	CG9509 OS=Drosophila melanogaster GN=CG9509 PE=1 SV=1	0.92	0.8	0.98	0.98	1.18	1.03	1.11	22	7	71	15.5	0.0296023	0.92	1.10667	1.2029	1.52867
2609.1	tr|Q9W3T2|Q9W3T2_DROME	CG4593 OS=Drosophila melanogaster GN=CG4593-RA PE=2 SV=1	0.91	0.87	1.05	0.9	1.13	1.04	1.1	7	4	25	14.1	0.0297703	0.9325	1.09	1.1689	1.52622
1320.2	sp|Q07407|FGFR1_DROME	Fibroblast growth factor receptor homolog 1 OS=Drosophila melanogaster GN=htl PE=2 SV=3	0.97	0.94	0.94	0.97	1.1	1.1	0.98	4	4	83	2.4	0.0300992	0.955	1.06	1.10995	1.52144
2920.1	tr|Q9VXD7|Q9VXD7_DROME	CG32573, isoform A OS=Drosophila melanogaster GN=CG4524 PE=2 SV=1	0.87	0.95	1.03	0.89	1.07	1.04	1.15	6	2	45	6.7	0.0302397	0.935	1.08667	1.16221	1.51942
2194.1	tr|Q9VD48|Q9VD48_DROME	CG5791 OS=Drosophila melanogaster GN=CG5791 PE=2 SV=1	0.98	0.79	0.92	0.79	1.09	1.06	1.38	10	2	10	49	0.0302734	0.87	1.17667	1.35249	1.51894
1656.1	tr|Q9VHG4|Q9VHG4_DROME	CG8444 OS=Drosophila melanogaster GN=VhaM8.9 PE=2 SV=1	0.94	0.98	1	0.97	1.05	1.05	1	15	4	34	21.8	0.0303526	0.9725	1.03333	1.06255	1.5178
1945.1	sp|P23779|CYTL_DROME	Cystatin-like protein OS=Drosophila melanogaster GN=Cys PE=1 SV=2	1.07	1.01	1.12	0.99	0.93	0.96	0.93	12	3	13	44.7	0.0304251	1.0475	0.94	0.897375	1.51677
3083.1	tr|Q9W0X1|Q9W0X1_DROME	CG2736 OS=Drosophila melanogaster GN=CG2736 PE=2 SV=1	0.9	0.91	1.01	0.98	1.03	1.05	1.12	5	3	58	4.3	0.030515	0.95	1.06667	1.12281	1.51549
1534.1	tr|Q8SZA8|Q8SZA8_DROME	CG1319 OS=Drosophila melanogaster GN=CG1319 PE=2 SV=1	1.01	0.87	1	0.85	1.13	1.08	1.06	17	3	16	51.8	0.0306495	0.9325	1.09	1.1689	1.51358
4077.1	tr|Q9VD09|Q9VD09_DROME	GH10582p OS=Drosophila melanogaster GN=pinta PE=2 SV=1	0.85	1.02	0.93	0.78	1.04	1.12	1.27	2	2	32	3.2	0.0306604	0.895	1.14333	1.27747	1.51342
3935.1	tr|Q9Y1A7|Q9Y1A7_DROME	LD25378p OS=Drosophila melanogaster GN=mnd PE=2 SV=1	0.98	0.96	0.94	0.94	1	1.13	1.04	3	1	54	2.8	0.0307479	0.955	1.05667	1.10646	1.51219
2962.1	sp|Q9VU84|DBNL_DROME	Drebrin-like protein OS=Drosophila melanogaster GN=CG10083 PE=1 SV=1	0.91	0.85	1.06	0.89	1.09	1.12	1.07	5	5	59	4.3	0.0307955	0.9275	1.09333	1.1788	1.51151
1139.1	tr|Q9VIG0|Q9VIG0_DROME	CG9257 OS=Drosophila melanogaster GN=CG9257 PE=2 SV=1	0.98	0.96	1.01	0.92	1.04	1.06	1.02	25	7	39	31.9	0.0308169	0.9675	1.04	1.07494	1.51121
262.1	sp|P11046|LAMB1_DROME	Laminin subunit beta-1 OS=Drosophila melanogaster GN=LanB1 PE=1 SV=4	0.98	0.9	1.02	0.91	1.1	1.04	1.05	102	29	198	25.7	0.0311797	0.9525	1.06333	1.11636	1.50613
1912.1	tr|Q9VMC9|Q9VMC9_DROME	CG9542 OS=Drosophila melanogaster GN=CG9542 PE=2 SV=1	0.89	0.91	1.02	0.99	1.05	1.07	1.07	12	5	35	17.2	0.0311797	0.9525	1.06333	1.11636	1.50613
5406.1	tr|Q9V4F3|Q9V4F3_DROME	CG11360 OS=Drosophila melanogaster GN=CG11360 PE=2 SV=2	0.87	0.96	0.96	1.02	1.05	1.08	1.06	1	1	67	0.7	0.0311797	0.9525	1.06333	1.11636	1.50613
1004.2	tr|Q9VHB2|Q9VHB2_DROME	CG9396 OS=Drosophila melanogaster GN=CG9396-RA PE=2 SV=1	1.02	0.96	0.95	0.95	1.01	1.06	1.05	5	2	17	15	0.0315904	0.97	1.04	1.07216	1.50045
107.1	tr|Q9W4Y3|Q9W4Y3_DROME	Terribly reduced optic lobes, isoform F OS=Drosophila melanogaster GN=trol PE=2 SV=2	0.99	0.93	1	0.95	1.09	1.02	1.03	270	54	513	26.3	0.0316098	0.9675	1.04667	1.08183	1.50018
524.1	sp|Q24319|OST48_DROME	Dolichyl-diphosphooligosaccharide--protein glycosyltransferase 48 kDa subunit OS=Drosophila melanogaster GN=Ost48 PE=2 SV=2	0.94	0.94	1.03	0.95	1.08	1.03	1.04	56	11	50	56.1	0.0317617	0.965	1.05	1.08808	1.4981
1430.1	tr|A1Z8U0|A1Z8U0_DROME	Pre-mRNA processing factor 8 OS=Drosophila melanogaster GN=Prp8 PE=4 SV=1	0.97	0.96	1.01	0.92	1.05	1.08	1.01	18	14	279	3.2	0.0318661	0.965	1.04667	1.08463	1.49667
1999.1	tr|Q9VNA3|Q9VNA3_DROME	CG11999 OS=Drosophila melanogaster GN=CG11999 PE=2 SV=1	0.92	0.86	1.03	0.91	1.12	1.01	1.15	11	6	24	23.3	0.0318661	0.93	1.09333	1.17563	1.49667
4060.1	tr|Q9VCU6|Q9VCU6_DROME	HP1c OS=Drosophila melanogaster GN=HP1c PE=2 SV=1	1.03	1.01	1.03	1.03	0.95	1.01	0.93	2	2	27	3.8	0.0321932	1.025	0.963333	0.939837	1.49224
153.1	sp|Q02645-2|HTS_DROME	Isoform B of Protein hu-li tai shao OS=Drosophila melanogaster GN=hts	0.97	0.94	1.02	0.97	1.04	1.05	1.02	180	25	79	113.5	0.0321932	0.975	1.03667	1.06325	1.49224
603.1	tr|Q9V470|Q9V470_DROME	LD44970p OS=Drosophila melanogaster GN=Sucb PE=2 SV=1	1.03	1	1.08	1.06	0.97	0.98	0.88	49	9	45	54.4	0.0321989	1.0425	0.943333	0.904876	1.49216
2626.1	tr|Q9VTL0|Q9VTL0_DROME	CG6083 OS=Drosophila melanogaster GN=CG6083 PE=2 SV=2	0.99	0.89	1	0.91	1.11	1.01	1.09	7	4	36	9.6	0.0322347	0.9475	1.07	1.12929	1.49168
740.1	tr|Q9VU94|Q9VU94_DROME	Hemolectin OS=Drosophila melanogaster GN=Hml PE=2 SV=2	0.94	0.88	1.04	0.93	1.1	1.05	1.06	39	23	426	4.6	0.0322347	0.9475	1.07	1.12929	1.49168
5313.1	tr|Q9VK63|Q9VK63_DROME	CG5776 OS=Drosophila melanogaster GN=CG5776 PE=2 SV=1	0.63	1.19	0.66	0.59	1.46	1.33	1.14	1	1	89	0.6	0.0323369	0.7675	1.31	1.70684	1.4903
516.1	tr|Q8IN49|Q8IN49_DROME	CG31195 OS=Drosophila melanogaster GN=CG31195-RA PE=2 SV=2	1	0.95	0.99	0.93	1.08	1.01	1.04	57	15	94	30.2	0.0326327	0.9675	1.04333	1.07838	1.48635
313.1	tr|Q8MSW0|Q8MSW0_DROME	Isoleucyl-tRNA synthetase, isoform A OS=Drosophila melanogaster GN=Aats-ile PE=2 SV=1	0.97	0.89	1.03	0.91	1.11	1.05	1.05	91	36	141	32.3	0.0327199	0.95	1.07	1.12632	1.48519
5461.1	sp|P07207|NOTCH_DROME	Neurogenic locus Notch protein OS=Drosophila melanogaster GN=N PE=1 SV=3	0.72	0.64	1.17	0.74	1.17	1.26	1.29	1	1	289	0.2	0.0328971	0.8175	1.24	1.51682	1.48284
1704.1	tr|Q9W541|Q9W541_DROME	EIF2B-epsilon protein OS=Drosophila melanogaster GN=eIF2B-epsilon PE=2 SV=1	0.96	0.94	1.02	0.95	1.06	1.01	1.05	14	7	75	9.3	0.0329183	0.9675	1.04	1.07494	1.48256
163.1	sp|P15215|LAMC1_DROME	Laminin subunit gamma-1 OS=Drosophila melanogaster GN=LanB2 PE=1 SV=2	0.97	0.92	1.02	0.95	1.05	1.06	1.02	165	40	182	45.3	0.032997	0.965	1.04333	1.08117	1.48153
1542.1	tr|Q8SZW5|Q8SZW5_DROME	Alpha-Esterase-3, isoform A OS=Drosophila melanogaster GN=alpha-Est3 PE=2 SV=1	0.93	0.94	1.01	0.98	1.08	1.02	1.03	16	10	61	13	0.032997	0.965	1.04333	1.08117	1.48153
573.1	tr|Q9VYT3|Q9VYT3_DROME	CG2025 OS=Drosophila melanogaster GN=CG2025 PE=1 SV=2	0.94	0.95	1.02	0.98	1.03	1.03	1.05	51	19	133	19.2	0.0330484	0.9725	1.03667	1.06598	1.48085
161.1	tr|E1JJF9|E1JJF9_DROME	Neuroglian, isoform D OS=Drosophila melanogaster GN=Nrg PE=4 SV=1	0.97	0.95	1.02	0.97	1.05	1.03	1.02	167	30	138	60.4	0.0331539	0.9775	1.03333	1.05712	1.47947
463.1	sp|Q9VGS2|TCTP_DROME	Translationally-controlled tumor protein homolog OS=Drosophila melanogaster GN=Tctp PE=1 SV=1	0.93	0.92	0.98	0.98	1.13	1.08	0.99	65	6	20	165.6	0.0331796	0.9525	1.06667	1.11986	1.47913
1929.1	tr|Q9V3T3|Q9V3T3_DROME	BcDNA.GH03016 OS=Drosophila melanogaster GN=Rh50 PE=2 SV=1	0.91	0.84	0.9	0.96	1.28	1.13	0.98	12	4	48	12.4	0.0332781	0.9025	1.13	1.25208	1.47784
5459.1	tr|A1Z7G0|A1Z7G0_DROME	CG42326, isoform D OS=Drosophila melanogaster GN=CG14748 PE=4 SV=1	0.65	0.92	1.05	0.81	1.13	1.12	1.32	1	1	108	0.5	0.0332834	0.8575	1.19	1.38776	1.47777
1255.1	sp|A1Z9A2|U587_DROME	UPF0587 protein CG4646 OS=Drosophila melanogaster GN=CG4646 PE=2 SV=1	0.99	0.91	1.02	0.94	1.05	1.05	1.05	22	5	19	59.2	0.033298	0.965	1.05	1.08808	1.47758
1016.1	sp|P08111-3|L2GL_DROME	Isoform B of Lethal(2) giant larvae protein OS=Drosophila melanogaster GN=l(2)gl	0.98	0.92	1.02	0.94	1.06	1.07	1.02	28	13	126	11.1	0.033298	0.965	1.05	1.08808	1.47758
2007.1	tr|Q9VMM9|Q9VMM9_DROME	CG11147, isoform A OS=Drosophila melanogaster GN=CG11147 PE=2 SV=2	0.97	0.92	0.99	0.95	1.12	1.05	1	11	6	80	6.9	0.0333296	0.9575	1.05667	1.10357	1.47717
2877.1	tr|Q9VBC1|Q9VBC1_DROME	CG14246 OS=Drosophila melanogaster GN=CG14246 PE=1 SV=1	0.84	0.87	1.06	0.93	1.13	1.06	1.11	6	3	11	26.2	0.0335846	0.925	1.1	1.18919	1.47386
352.1	tr|Q9VTB4|Q9VTB4_DROME	CG6463 OS=Drosophila melanogaster GN=CG33493 PE=2 SV=2	0.92	0.98	1.01	0.97	1.07	1.04	1.02	84	6	14	304.8	0.0336415	0.97	1.04333	1.0756	1.47312
4992.1	tr|Q9VN52|Q9VN52_DROME	CG31530 OS=Drosophila melanogaster GN=CG31530 PE=1 SV=2	0.97	0.88	0.96	0.75	1.27	1	1.18	1	1	69	0.7	0.0337099	0.89	1.15	1.29213	1.47224
2325.1	tr|Q9I7I3|Q9I7I3_DROME	CG31199 OS=Drosophila melanogaster GN=CG17837 PE=2 SV=2	0.95	0.98	0.92	1	1	1.06	1.09	9	3	33	13.7	0.0343166	0.9625	1.05	1.09091	1.4645
10.1	sp|P22700-2|ATC1_DROME	Isoform A of Calcium-transporting ATPase sarcoplasmic/endoplasmic reticulum type OS=Drosophila melanogaster GN=Ca-P60A	1.02	0.89	0.98	0.94	1.08	1.04	1.05	2174	44	110	992.3	0.034469	0.9575	1.05667	1.10357	1.46257
4376.1	sp|Q9W0C7|OPI10_DROME	Protein OPI10 homolog OS=Drosophila melanogaster GN=CG13926 PE=2 SV=1	0.93	0.87	0.98	0.97	1.05	1.18	1.02	2	1	22	4.6	0.0344928	0.9375	1.08333	1.15556	1.46227
571.1	sp|P20432|GSTT1_DROME	Glutathione S-transferase 1-1 OS=Drosophila melanogaster GN=GstD1 PE=1 SV=1	0.95	0.84	1.04	0.79	1.14	1.04	1.21	52	6	24	109	0.0345705	0.905	1.13	1.24862	1.46129
1115.1	sp|Q94519-2|ACPM_DROME	Isoform 1 of Acyl carrier protein, mitochondrial OS=Drosophila melanogaster GN=mtacp1	1.31	1.13	1.11	1	1.01	0.7	0.74	26	4	16	81.3	0.0345715	1.1375	0.816667	0.717949	1.46128
5094.1	tr|Q9VP96|Q9VP96_DROME	CG10589 OS=Drosophila melanogaster GN=CG10589 PE=2 SV=1	0.99	0.89	0.99	0.97	1.03	1.1	1.04	1	1	44	1.1	0.0346491	0.96	1.05667	1.10069	1.46031
1891.1	sp|Q24210|CSKP_DROME	Peripheral plasma membrane protein CASK OS=Drosophila melanogaster GN=CASK PE=1 SV=4	0.93	0.94	1.01	0.97	1.06	1.08	1	12	7	101	6	0.0347553	0.9625	1.04667	1.08745	1.45898
1602.1	tr|Q9VIH7|Q9VIH7_DROME	CG9339, isoform A OS=Drosophila melanogaster GN=sky PE=2 SV=2	0.95	0.92	1.02	0.93	1.1	1	1.09	15	9	67	11.2	0.0347732	0.955	1.06333	1.11344	1.45876
267.1	sp|Q9U915|KAD2_DROME	Adenylate kinase 2, mitochondrial OS=Drosophila melanogaster GN=Adk2 PE=1 SV=1	0.97	0.9	1.03	0.94	1.06	1.05	1.05	101	12	27	190.4	0.0350061	0.96	1.05333	1.09722	1.45586
773.1	sp|P10379|UZIP_DROME	Protein unzipped OS=Drosophila melanogaster GN=uzip PE=1 SV=2	0.98	0.95	1.01	0.98	1.04	1.03	1.01	38	10	54	35	0.0350061	0.98	1.02667	1.04762	1.45586
2793.1	tr|Q9V3E9|Q9V3E9_DROME	Spaghetti OS=Drosophila melanogaster GN=spag PE=2 SV=1	0.92	0.93	1.04	0.93	1.07	1.07	1.03	6	4	60	5	0.0350534	0.955	1.05667	1.10646	1.45527
30.1	sp|Q94523|DHSA_DROME	Succinate dehydrogenase [ubiquinone] flavoprotein subunit, mitochondrial OS=Drosophila melanogaster GN=SdhA PE=2 SV=3	0.98	0.94	1.02	0.96	1.05	1.02	1.04	1004	25	72	694.4	0.0351348	0.975	1.03667	1.06325	1.45426
461.1	sp|Q24046|ATPB1_DROME	Sodium/potassium-transporting ATPase subunit beta-1 OS=Drosophila melanogaster GN=nrv1 PE=1 SV=2	0.97	0.9	1.01	0.92	1.1	1	1.09	65	10	35	92.1	0.035437	0.95	1.06333	1.1193	1.45054
3940.1	tr|Q9VKR7|Q9VKR7_DROME	CG7300 OS=Drosophila melanogaster GN=CG7300 PE=2 SV=2	0.89	0.89	1.07	0.81	1.18	1.07	1.1	3	1	80	1.9	0.0356139	0.915	1.11667	1.2204	1.44838
5711.1	tr|Q9VMQ4|Q9VMQ4_DROME	Chromosome associated protein D3, isoform A OS=Drosophila melanogaster GN=Cap-D3 PE=2 SV=2	0.99	1.05	1.05	1.08	0.89	1	0.94	1	1	145	0.3	0.0356169	1.0425	0.943333	0.904876	1.44834
3004.1	tr|Q9W147|Q9W147_DROME	Fcp1 OS=Drosophila melanogaster GN=Fcp1 PE=2 SV=1	0.96	0.93	0.94	0.98	1.03	1.01	1.15	5	4	97	2.6	0.0357254	0.9525	1.06333	1.11636	1.44702
648.1	tr|Q7JWX3|Q7JWX3_DROME	GH10112p OS=Drosophila melanogaster GN=nec PE=2 SV=1	0.97	0.98	0.99	0.95	0.99	1.05	1.07	45	12	54	41.9	0.0357788	0.9725	1.03667	1.06598	1.44637
2049.1	sp|P56538|IF6_DROME	Eukaryotic translation initiation factor 6 OS=Drosophila melanogaster GN=eIF6 PE=2 SV=3	0.91	0.93	1	0.94	1.15	1.08	0.99	11	4	26	20.8	0.0357788	0.945	1.07333	1.1358	1.44637
612.1	tr|Q9W3N9|Q9W3N9_DROME	CG10932 OS=Drosophila melanogaster GN=CG10932 PE=2 SV=1	0.93	0.93	1	0.99	1	1.07	1.08	48	12	43	55.2	0.0357911	0.9625	1.05	1.09091	1.44623
75.1	sp|Q9W596|FUTSC_DROME	Microtubule-associated protein futsch OS=Drosophila melanogaster GN=futsch PE=1 SV=4	0.95	0.92	1.03	0.95	1.06	1.02	1.07	431	116	592	36.4	0.0357911	0.9625	1.05	1.09091	1.44623
2925.1	tr|Q9VLI1|Q9VLI1_DROME	CG9465 OS=Drosophila melanogaster GN=CG9465 PE=1 SV=1	0.99	0.89	0.98	0.96	1.02	1.12	1.04	6	2	108	2.8	0.0361618	0.955	1.06	1.10995	1.44175
1447.1	tr|Q7KUA4|Q7KUA4_DROME	LD22577p OS=Drosophila melanogaster GN=Uba2 PE=2 SV=1	0.94	0.96	1	0.98	1	1.04	1.08	18	8	78	11.6	0.0361618	0.97	1.04	1.07216	1.44175
5523.1	sp|P14954|CECA_DROME	Cecropin-A1/A2 OS=Drosophila melanogaster GN=CecA1 PE=2 SV=1	0.82	0.58	0.75	0.71	1.92	1.08	1.14	1	1	7	7.4	0.0362132	0.715	1.38	1.93007	1.44113
1222.1	tr|Q9VXG9|Q9VXG9_DROME	CG4239, isoform A OS=Drosophila melanogaster GN=CG4239 PE=2 SV=1	0.86	0.93	1.01	0.97	1.1	1.01	1.12	23	4	30	37.9	0.0362846	0.9425	1.07667	1.14235	1.44028
4070.1	tr|Q9VPC3|Q9VPC3_DROME	CG4074 OS=Drosophila melanogaster GN=CG4074 PE=2 SV=1	1.08	0.85	0.85	0.84	1.18	1.16	1.04	2	2	33	3	0.036419	0.905	1.12667	1.24494	1.43867
2081.1	sp|Q9VN45|Y2001_DROME	Uncharacterized protein CG12001 OS=Drosophila melanogaster GN=CG12001 PE=1 SV=1	0.95	0.96	1.03	0.93	1.06	1.03	1.04	10	8	60	8.4	0.0365465	0.9675	1.04333	1.07838	1.43715
3119.1	tr|Q59DZ9|Q59DZ9_DROME	Quick-to-court, isoform G OS=Drosophila melanogaster GN=qtc PE=2 SV=1	1.03	0.88	0.98	0.92	1.05	1.09	1.06	5	3	60	4.2	0.0366404	0.9525	1.06667	1.11986	1.43604
1199.1	sp|Q24185|HOOK_DROME	Protein hook OS=Drosophila melanogaster GN=hk PE=1 SV=2	0.92	0.98	1.01	0.98	1.05	1.05	1.02	23	9	77	15	0.0366588	0.9725	1.04	1.06941	1.43582
531.1	tr|Q9V3L7|Q9V3L7_DROME	GH05862p OS=Drosophila melanogaster GN=NP15.6 PE=2 SV=1	0.9	0.93	1.02	0.98	1.02	1.07	1.08	56	4	17	165.1	0.0367728	0.9575	1.05667	1.10357	1.43447
4359.1	sp|Q9VH19|LMLN_DROME	Leishmanolysin-like peptidase OS=Drosophila melanogaster GN=Invadolysin PE=2 SV=2	0.9	0.9	0.94	1.03	1.04	1.15	1.04	2	1	77	1.3	0.0369176	0.9425	1.07667	1.14235	1.43277
2961.1	tr|Q9VKG8|Q9VKG8_DROME	CG6509, isoform A OS=Drosophila melanogaster GN=CG6509 PE=2 SV=1	0.97	0.92	1.02	0.95	1.04	1.08	1.02	5	5	210	1.2	0.0369208	0.965	1.04667	1.08463	1.43273
3494.1	tr|Q95TS2|Q95TS2_DROME	CG7777, isoform B OS=Drosophila melanogaster GN=CG7777 PE=2 SV=1	1.03	0.87	0.89	0.94	1.1	1.01	1.16	4	2	29	6.9	0.0369654	0.9325	1.09	1.1689	1.4322
1502.1	tr|Q9W2G9|Q9W2G9_DROME	Acyl-Coenzyme A oxidase at 57D proximal OS=Drosophila melanogaster GN=Acox57D-p PE=2 SV=1	0.97	0.83	1.04	0.9	1.1	1.08	1.08	17	7	76	11.2	0.0370424	0.935	1.08667	1.16221	1.4313
1840.1	tr|Q9VJI1|Q9VJI1_DROME	CG17928 OS=Drosophila melanogaster GN=CG17928 PE=2 SV=1	0.91	0.86	1.05	0.92	1.14	1.08	1.04	13	4	51	12.7	0.0370424	0.935	1.08667	1.16221	1.4313
1661.1	tr|Q9VR44|Q9VR44_DROME	CG3036 OS=Drosophila melanogaster GN=CG3036 PE=2 SV=1	1	0.91	0.96	0.93	0.99	1.08	1.13	15	4	54	13.9	0.037092	0.95	1.06667	1.12281	1.43072
2769.1	sp|P35832-2|PTP99_DROME	Isoform A of Tyrosine-protein phosphatase 99A OS=Drosophila melanogaster GN=Ptp99A	0.94	0.83	1.04	0.91	1.14	1.09	1.04	6	5	137	2.2	0.0371248	0.93	1.09	1.17204	1.43034
2636.2	tr|Q9I7S2|Q9I7S2_DROME	CG11158 OS=Drosophila melanogaster GN=CG11158 PE=2 SV=1	0.89	0.99	1.02	0.85	1.07	1.05	1.13	4	3	39	5.2	0.0371592	0.9375	1.08333	1.15556	1.42993
1606.1	sp|Q9VCG3|OPA32_DROME	Putative OPA3-like protein CG13603 OS=Drosophila melanogaster GN=CG13601 PE=2 SV=1	0.96	0.9	1.03	0.95	1.06	1.05	1.04	15	8	29	26.2	0.0375994	0.96	1.05	1.09375	1.42482
1481.1	sp|Q9U5L1|SRPR_DROME	Signal recognition particle receptor subunit alpha homolog OS=Drosophila melanogaster GN=Gtp-bp PE=1 SV=2	1	0.89	1.01	0.94	1.06	1.05	1.05	17	9	68	12.6	0.0376174	0.96	1.05333	1.09722	1.42461
3736.1	tr|Q9U4F8|Q9U4F8_DROME	BcDNA.LD34475 OS=Drosophila melanogaster GN=BcDNA.LD34475 PE=2 SV=1	0.98	0.95	0.99	0.91	1.08	1.1	0.99	3	2	113	1.3	0.0379363	0.9575	1.05667	1.10357	1.42095
4306.1	tr|Q8MS09|Q8MS09_DROME	CG4629, isoform C OS=Drosophila melanogaster GN=CG4629 PE=2 SV=1	0.95	0.97	0.92	1.02	1.06	1.08	1.01	2	2	52	1.9	0.0380012	0.965	1.05	1.08808	1.4202
5705.1	tr|Q86NT5|Q86NT5_DROME	Malic enzyme OS=Drosophila melanogaster GN=Menl-1 PE=2 SV=1	1.02	1.19	1.09	0.99	0.89	0.86	0.97	1	1	68	0.7	0.0381509	1.0725	0.906667	0.845377	1.4185
1488.1	tr|Q9W1B5|Q9W1B5_DROME	CG3209, isoform C OS=Drosophila melanogaster GN=CG3209-RA PE=2 SV=2	0.98	0.88	1.03	0.9	1.07	1.04	1.1	17	9	52	16.3	0.0382568	0.9475	1.07	1.12929	1.41729
1315.2	tr|Q9VGM1|Q9VGM1_DROME	CG14709 OS=Drosophila melanogaster GN=BEST:CK01227 PE=2 SV=2	1.03	0.88	0.94	0.94	1.12	1.07	1.02	15	13	148	5.1	0.0382568	0.9475	1.07	1.12929	1.41729
5142.1	tr|Q9VCA1|Q9VCA1_DROME	AT01267p OS=Drosophila melanogaster GN=CG13611 PE=2 SV=1	0.58	0.63	1.02	1.05	1.18	1.3	1.24	1	1	54	0.9	0.0383007	0.82	1.24	1.5122	1.41679
154.1	tr|A1Z7Z4|A1Z7Z4_DROME	CG1648, isoform B OS=Drosophila melanogaster GN=CG1648 PE=4 SV=1	0.91	0.92	1.02	0.96	1.09	1	1.11	180	17	24	371.8	0.0383977	0.9525	1.06667	1.11986	1.4157
2235.1	tr|Q9VDC0|Q9VDC0_DROME	CG3301, isoform A OS=Drosophila melanogaster GN=CG3301 PE=2 SV=1	0.98	0.98	0.98	0.92	1.09	1	1.04	9	6	27	16.5	0.0385379	0.965	1.04333	1.08117	1.41411
1208.1	sp|Q9W0I6|SAC1_DROME	Phosphatidylinositide phosphatase SAC1 OS=Drosophila melanogaster GN=Sac1 PE=1 SV=1	1	0.9	0.99	0.98	1.04	1.04	1.05	23	8	68	17	0.0385381	0.9675	1.04333	1.07838	1.41411
392.1	tr|Q7K4T8|Q7K4T8_DROME	CG8520 OS=Drosophila melanogaster GN=CG8520 PE=2 SV=1	0.98	0.92	1.02	0.95	1.06	1.02	1.05	75	16	52	71.5	0.0385381	0.9675	1.04333	1.07838	1.41411
2843.1	tr|Q8SX54|Q8SX54_DROME	CG3505 OS=Drosophila melanogaster GN=CG3505 PE=2 SV=1	0.96	0.95	0.99	0.99	1.06	0.99	1.06	6	3	40	7.6	0.0385546	0.9725	1.03667	1.06598	1.41392
5347.1	tr|Q9VV47|Q9VV47_DROME	CG4842 OS=Drosophila melanogaster GN=CG4842 PE=2 SV=2	0.73	0.9	0.93	0.94	1.3	1.25	0.96	1	1	28	1.8	0.0387578	0.875	1.17	1.33714	1.41164
119.1	tr|E1JHT6|E1JHT6_DROME	Rtnl1, isoform H OS=Drosophila melanogaster GN=Rtnl1 PE=4 SV=1	0.98	0.93	1.01	0.98	1.02	1.03	1.05	227	18	65	173.5	0.0387785	0.975	1.03333	1.05983	1.41141
4319.1	tr|A1ZAN7|A1ZAN7_DROME	RhoGEF2, isoform E OS=Drosophila melanogaster GN=RhoGEF2 PE=4 SV=1	0.77	0.99	0.97	0.64	1.38	1.23	1.02	2	2	242	0.4	0.0388536	0.8425	1.21	1.4362	1.41057
4286.1	tr|Q8IP67|Q8IP67_DROME	CG9008, isoform B OS=Drosophila melanogaster GN=CG9008 PE=2 SV=2	1.03	0.83	0.98	0.87	1.13	1.03	1.15	2	2	23	4.4	0.0389987	0.9275	1.10333	1.18958	1.40895
746.1	tr|Q8IR21|Q8IR21_DROME	CG42354, isoform A OS=Drosophila melanogaster GN=CG42354 PE=2 SV=1	0.96	0.89	1	0.94	1.09	0.99	1.13	39	13	57	34.4	0.0390245	0.9475	1.07	1.12929	1.40866
1615.1	tr|Q0E9F3|Q0E9F3_DROME	CG8740, isoform A OS=Drosophila melanogaster GN=CG8740-RB PE=2 SV=1	0.91	0.91	1.06	0.89	1.1	1.1	1.04	15	8	113	6.7	0.039227	0.9425	1.08	1.14589	1.40641
1775.1	tr|Q9VNC3|Q9VNC3_DROME	Holocarboxylase synthetase OS=Drosophila melanogaster GN=Hcs PE=2 SV=2	0.96	0.89	1.04	0.87	1.11	1.06	1.05	13	9	116	5.6	0.0393882	0.94	1.07333	1.14184	1.40463
4120.1	sp|Q9VDS5|RG92B_DROME	Rho GTPase-activating protein 92B OS=Drosophila melanogaster GN=RhoGAP92B PE=1 SV=1	0.94	0.94	1.02	0.87	1.15	1.06	1.02	2	2	83	1.2	0.0394714	0.9425	1.07667	1.14235	1.40372
532.1	tr|O46067|O46067_DROME	CG2918, isoform A OS=Drosophila melanogaster GN=EG:25E8.1 PE=2 SV=1	0.95	0.91	1.04	0.94	1.07	1.07	1.03	55	25	103	26.6	0.0395383	0.96	1.05667	1.10069	1.40298
396.1	tr|A1Z9M5|A1Z9M5_DROME	CG30069 OS=Drosophila melanogaster GN=CG30069 PE=4 SV=1	0.97	0.89	1.03	0.93	1.1	1.06	1.03	74	31	461	8	0.0396424	0.955	1.06333	1.11344	1.40184
1056.1	tr|Q9VYL5|Q9VYL5_DROME	CG1824 OS=Drosophila melanogaster GN=CG1824 PE=2 SV=1	0.96	0.88	1.01	0.98	1.1	1.05	1.03	27	12	84	16.2	0.0401284	0.9575	1.06	1.10705	1.39655
559.1	tr|Q9W425|Q9W425_DROME	CG3585 OS=Drosophila melanogaster GN=Rbcn-3A PE=2 SV=2	0.96	0.94	1.01	0.94	1.08	1.09	0.99	52	24	377	6.9	0.0402415	0.9625	1.05333	1.09437	1.39533
2718.1	sp|Q9VV28|NPLP3_DROME	Neuropeptide-like 3 OS=Drosophila melanogaster GN=Nplp3 PE=1 SV=1	1.08	1	1.03	1.04	0.92	1.01	0.92	7	1	9	40.3	0.0402899	1.0375	0.95	0.915663	1.3948
2034.1	tr|Q9VYU9|Q9VYU9_DROME	CG9360 OS=Drosophila melanogaster GN=CG9360 PE=2 SV=1	0.99	0.91	1.01	0.94	1.01	1.07	1.07	11	5	27	20.3	0.0402899	0.9625	1.05	1.09091	1.3948
285.1	tr|A1Z713|A1Z713_DROME	Vacuolar protein sorting 13 OS=Drosophila melanogaster GN=Vps13 PE=4 SV=2	0.98	0.95	1.01	0.97	1.05	1.02	1.01	97	42	374	13	0.0403535	0.9775	1.02667	1.0503	1.39412
486.2	tr|Q9VIX3|Q9VIX3_DROME	Paxillin, isoform B OS=Drosophila melanogaster GN=Pax PE=2 SV=2	0.97	0.95	1.02	0.93	1.08	1.02	1.03	59	10	62	47.7	0.0405503	0.9675	1.04333	1.07838	1.39201
796.1	tr|Q9VTD7|Q9VTD7_DROME	CG7888, isoform B OS=Drosophila melanogaster GN=CG7888 PE=2 SV=1	1	0.91	1.01	0.86	1.08	1.03	1.12	37	3	51	36.1	0.0407049	0.945	1.07667	1.13933	1.39035
4182.1	tr|Q8IGV3|Q8IGV3_DROME	CG12746, isoform B OS=Drosophila melanogaster GN=CG12746 PE=2 SV=1	0.85	0.88	1.06	0.76	1.27	1.02	1.16	2	2	41	2.4	0.040965	0.8875	1.15	1.29577	1.38759
1262.1	sp|Q9NBD7|CLASP_DROME	CLIP-associating protein OS=Drosophila melanogaster GN=chb PE=1 SV=1	0.95	0.92	1.04	0.95	1.04	1.06	1.05	21	14	165	6.3	0.041205	0.965	1.05	1.08808	1.38505
235.2	tr|Q9VCV4|Q9VCV4_DROME	Iron regulatory protein 1A OS=Drosophila melanogaster GN=Irp-1A PE=2 SV=1	1	0.95	0.96	0.91	1.12	1.07	0.99	44	22	99	22.3	0.0413881	0.955	1.06	1.10995	1.38312
2115.1	tr|Q9W332|Q9W332_DROME	CG32702 OS=Drosophila melanogaster GN=CG32702 PE=2 SV=3	0.98	0.91	0.97	0.96	1.09	1.11	0.98	10	6	418	1.2	0.0413881	0.955	1.06	1.10995	1.38312
3770.1	sp|Q95RA8|MOB1_DROME	Mps one binder kinase activator-like 1 OS=Drosophila melanogaster GN=mats PE=1 SV=1	0.95	0.8	1.07	0.82	1.11	1.15	1.09	3	2	25	6	0.041479	0.91	1.11667	1.22711	1.38217
1280.1	tr|Q9VN39|Q9VN39_DROME	CG9775, isoform A OS=Drosophila melanogaster GN=CG9775 PE=2 SV=1	0.92	0.88	1.02	0.95	1.16	1.07	1.01	21	8	46	22.8	0.0416857	0.9425	1.08	1.14589	1.38001
2001.1	sp|Q8T9B6|MESD_DROME	LDLR chaperone boca OS=Drosophila melanogaster GN=boca PE=1 SV=2	0.85	0.87	1.04	0.89	1.15	0.99	1.21	11	6	21	26.2	0.0418431	0.9125	1.11667	1.22374	1.37838
1996.1	tr|A1Z8J3|A1Z8J3_DROME	No mechanoreceptor potential A, isoform C OS=Drosophila melanogaster GN=nompA PE=4 SV=1	1.01	0.9	0.96	0.91	1.16	1.02	1.04	11	7	174	3.2	0.0420803	0.945	1.07333	1.1358	1.37592
4184.1	sp|Q9VXD9|MTH1_DROME	Probable G-protein coupled receptor Mth-like 1 OS=Drosophila melanogaster GN=mthl1 PE=2 SV=1	0.99	0.96	0.99	0.99	1.02	1.05	1	2	2	74	1.3	0.0421238	0.9825	1.02333	1.04156	1.37547
3563.1	tr|Q9V3J9|Q9V3J9_DROME	CG15267 OS=Drosophila melanogaster GN=dao PE=1 SV=1	0.99	0.97	0.96	0.94	1.11	1	1.03	3	3	99	1.5	0.0421238	0.965	1.04667	1.08463	1.37547
284.1	tr|A8DY79|A8DY79_DROME	Bruchpilot, isoform G OS=Drosophila melanogaster GN=brp PE=4 SV=2	0.96	0.95	1.03	0.94	1.07	1.02	1.04	98	39	207	23.7	0.0421691	0.97	1.04333	1.0756	1.37501
3787.1	tr|Q9VH02|Q9VH02_DROME	CG6293 OS=Drosophila melanogaster GN=CG6293-RA PE=2 SV=1	0.88	0.75	1.01	0.86	1.34	0.98	1.18	3	2	62	2.4	0.042194	0.875	1.16667	1.33333	1.37475
1671.1	sp|Q9U4F3|SURF1_DROME	SURF1-like protein OS=Drosophila melanogaster GN=Surf1 PE=2 SV=1	1	0.94	1.01	0.95	1.02	1.04	1.04	15	2	34	22	0.042194	0.975	1.03333	1.05983	1.37475
1519.1	tr|A1Z9F9|A1Z9F9_DROME	CG13335, isoform A OS=Drosophila melanogaster GN=CG13335 PE=4 SV=1	0.94	0.92	1.03	0.92	1.06	1.01	1.12	17	6	46	18.3	0.0422989	0.9525	1.06333	1.11636	1.37367
2244.1	tr|Q9VIV6|Q9VIV6_DROME	CG10194 OS=Drosophila melanogaster GN=CG10194 PE=2 SV=1	0.92	0.91	1.04	0.95	1.08	1.02	1.08	9	6	40	11.2	0.0424491	0.955	1.06	1.10995	1.37213
2714.1	tr|Q9VZK4|Q9VZK4_DROME	CG14984 OS=Drosophila melanogaster GN=CG14984 PE=2 SV=2	0.93	0.99	0.98	0.99	1	1.04	1.06	7	1	12	29	0.0426329	0.9725	1.03333	1.06255	1.37025
4731.1	sp|Q9VRL2|GOSR2_DROME	Probable Golgi SNAP receptor complex member 2 OS=Drosophila melanogaster GN=membrin PE=1 SV=1	0.87	1	1.01	0.82	1.15	1.02	1.14	1	1	25	2	0.0427354	0.925	1.10333	1.19279	1.36921
2672.1	tr|Q9VQC0|Q9VQC0_DROME	Vesicular glutamate transporter OS=Drosophila melanogaster GN=VGlut PE=2 SV=2	0.93	0.85	1.03	0.92	1	1.12	1.14	7	3	69	5.1	0.0427754	0.9325	1.08667	1.16533	1.36881
2606.1	tr|Q9XZ68|Q9XZ68_DROME	Beta subunit of type II geranylgeranyl transferase OS=Drosophila melanogaster GN=betaggt-II PE=2 SV=1	0.98	0.94	1.02	0.92	1.06	1.01	1.08	7	4	39	9.1	0.0428247	0.965	1.05	1.08808	1.36831
999.1	sp|P02515|HSP22_DROME	Heat shock protein 22 OS=Drosophila melanogaster GN=Hsp22 PE=1 SV=4	1.57	1.13	1.25	0.86	0.66	0.75	0.77	29	8	20	73.4	0.0429202	1.2025	0.726667	0.604297	1.36734
712.1	tr|Q8IMG1|Q8IMG1_DROME	CG1910, isoform C OS=Drosophila melanogaster GN=CG1910 PE=2 SV=1	0.94	0.9	1.04	0.91	1.12	1.03	1.05	41	11	49	41.6	0.0429693	0.9475	1.06667	1.12577	1.36684
4905.1	tr|Q9VHX7|Q9VHX7_DROME	CG2781 OS=Drosophila melanogaster GN=CG2781 PE=2 SV=2	0.87	0.88	0.86	1	1.28	1.14	0.97	1	1	38	1.3	0.0430349	0.9025	1.13	1.25208	1.36618
4366.1	sp|O97172|U729_DROME	UPF0729 protein CG18508 OS=Drosophila melanogaster GN=CG18508 PE=1 SV=1	0.66	0.77	0.98	0.83	1.31	0.93	1.52	2	1	11	9	0.0431349	0.81	1.25333	1.54733	1.36517
88.1	sp|Q00174|LAMA_DROME	Laminin subunit alpha OS=Drosophila melanogaster GN=LanA PE=1 SV=2	0.96	0.92	1.02	0.95	1.1	1.03	1.02	333	71	411	40.5	0.0433439	0.9625	1.05	1.09091	1.36307
784.1	tr|Q9W0C5|Q9W0C5_DROME	ABCB7, isoform A OS=Drosophila melanogaster GN=ABCB7 PE=1 SV=2	0.92	0.91	1.05	0.95	1.07	1.05	1.06	37	16	80	23	0.0434665	0.9575	1.06	1.10705	1.36185
732.1	tr|Q9VNF5|Q9VNF5_DROME	3-oxoacyl-[acyl-carrier-protein] synthase OS=Drosophila melanogaster GN=CG12170 PE=3 SV=1	0.98	0.89	1.03	0.92	1.07	1.03	1.08	40	11	46	43.1	0.0435147	0.955	1.06	1.10995	1.36136
2338.1	tr|Q9W2S2|Q9W2S2_DROME	Autophagy-specific gene 8a OS=Drosophila melanogaster GN=Atg8a PE=2 SV=1	0.76	0.91	1.02	0.98	1.15	1.07	1.1	9	2	14	31.3	0.0435522	0.9175	1.10667	1.20618	1.36099
3733.1	sp|Q9VZE7|CTLH1_DROME	CTL-like protein 1 OS=Drosophila melanogaster GN=CG1311 PE=2 SV=1	0.91	1.02	0.92	0.88	1.13	0.98	1.15	3	2	77	1.9	0.0437652	0.9325	1.08667	1.16533	1.35887
1950.1	tr|Q9U1K7|Q9U1K7_DROME	CG3939 OS=Drosophila melanogaster GN=EG:140G11.5 PE=2 SV=1	0.92	0.9	1.04	0.97	1.06	1.05	1.06	12	3	16	38.4	0.0438549	0.9575	1.05667	1.10357	1.35798
5239.1	sp|Q27350|SO_DROME	Protein sine oculis OS=Drosophila melanogaster GN=so PE=1 SV=1	0.95	0.98	0.99	0.88	1.11	1.1	0.99	1	1	45	1.1	0.0439209	0.95	1.06667	1.12281	1.35733
1095.1	tr|Q7KTW5|Q7KTW5_DROME	CG9391 OS=Drosophila melanogaster GN=CG9391 PE=2 SV=1	1.01	0.89	1.01	0.89	1.1	1.04	1.06	26	8	31	42.5	0.0439209	0.95	1.06667	1.12281	1.35733
5687.1	tr|Q86BH2|Q86BH2_DROME	Grunge, isoform C OS=Drosophila melanogaster GN=Gug PE=2 SV=1	0.9	1.26	1.17	1.16	0.96	0.75	0.81	1	1	211	0.2	0.0439936	1.1225	0.84	0.74833	1.35661
3874.1	tr|Q9W1Y3|Q9W1Y3_DROME	PIP5K59B, isoform E OS=Drosophila melanogaster GN=PIP5K59B PE=2 SV=3	1	0.94	1	0.98	1.04	1.01	1.04	3	2	83	1.8	0.0442098	0.98	1.03	1.05102	1.35448
1303.1	tr|Q9VCD9|Q9VCD9_DROME	CG6000, isoform A OS=Drosophila melanogaster GN=CG6000 PE=2 SV=2	0.91	0.98	1.02	0.95	1.05	1.02	1.06	21	4	17	63.2	0.0442419	0.965	1.04333	1.08117	1.35417
1017.1	tr|Q9VG81|Q9VG81_DROME	CG5167 OS=Drosophila melanogaster GN=CG5167 PE=2 SV=1	1.05	1.02	1.03	1	0.97	1	0.92	28	12	47	29.6	0.0442615	1.025	0.963333	0.939837	1.35397
1844.1	tr|Q9VAK7|Q9VAK7_DROME	CG2010, isoform A OS=Drosophila melanogaster GN=CG2010 PE=2 SV=2	0.96	0.99	0.99	1	1	1.03	1.04	13	4	59	11.1	0.0443437	0.985	1.02333	1.03892	1.35317
2381.1	tr|Q709R6|Q709R6_DROME	Bocksbeutel alpha OS=Drosophila melanogaster GN=bocksbeutel PE=2 SV=1	0.96	0.91	1.02	0.97	1.09	1.04	1.02	8	6	44	9.1	0.044455	0.965	1.05	1.08808	1.35208
3443.1	tr|Q7KE33|Q7KE33_DROME	Odorant binding protein c OS=Drosophila melanogaster GN=Obp51a PE=2 SV=1	1.02	0.85	0.91	0.95	1.01	1.08	1.18	4	2	13	15	0.0444657	0.9325	1.09	1.1689	1.35197
268.1	tr|Q9VSA9|Q9VSA9_DROME	CG7409 OS=Drosophila melanogaster GN=CG7409 PE=2 SV=1	0.97	0.93	1	0.95	0.99	1.06	1.11	101	10	18	281.2	0.0445021	0.9625	1.05333	1.09437	1.35162
3635.1	tr|Q9VR33|Q9VR33_DROME	CG15626, isoform A OS=Drosophila melanogaster GN=CG15626-RA PE=2 SV=1	0.85	0.9	1	0.96	1.19	0.99	1.1	3	3	57	2.6	0.0445122	0.9275	1.09333	1.1788	1.35152
5046.1	tr|Q9V9V7|Q9V9V7_DROME	LD23072p OS=Drosophila melanogaster GN=pasha PE=2 SV=1	1.07	1.05	0.99	1.02	1	0.92	0.95	1	1	72	0.7	0.0446292	1.0325	0.956667	0.926554	1.35038
1961.1	tr|Q9VAA6|Q9VAA6_DROME	CG7950, isoform A OS=Drosophila melanogaster GN=CG7950 PE=4 SV=3	0.93	0.9	1	0.96	1	1.05	1.15	12	1	17	35.9	0.0446292	0.9475	1.06667	1.12577	1.35038
363.1	sp|Q9V6U9|MECR_DROME	Probable trans-2-enoyl-CoA reductase, mitochondrial OS=Drosophila melanogaster GN=CG16935 PE=3 SV=2	0.92	0.96	1.02	0.97	1.01	1.05	1.07	81	14	39	103.6	0.0446292	0.9675	1.04333	1.07838	1.35038
1061.1	tr|Q7K2E1|Q7K2E1_DROME	CG8839, isoform A OS=Drosophila melanogaster GN=CG8839 PE=2 SV=1	0.98	0.93	1.01	0.95	1.05	1	1.08	27	9	58	23.2	0.0446292	0.9675	1.04333	1.07838	1.35038
4167.1	sp|Q9VHF2|PTER_DROME	Phosphotriesterase-related protein OS=Drosophila melanogaster GN=CG18473 PE=2 SV=1	0.99	1.16	1.17	0.99	0.97	0.86	0.87	2	2	39	2.5	0.0447114	1.0775	0.9	0.835267	1.34958
1508.2	tr|A8DZ06|A8DZ06_DROME	CG4587, isoform C OS=Drosophila melanogaster GN=CG4587 PE=4 SV=1	1	0.91	0.99	0.95	1.09	1.06	1	17	7	140	6	0.0448852	0.9625	1.05	1.09091	1.3479
3147.1	sp|Q9VSF4|DHYS_DROME	Probable deoxyhypusine synthase OS=Drosophila melanogaster GN=CG8005 PE=2 SV=2	0.9	0.85	1.07	0.91	1.09	1.05	1.14	5	2	41	6.1	0.0448971	0.9325	1.09333	1.17248	1.34778
1211.1	tr|Q9VDU7|Q9VDU7_DROME	CG31216 OS=Drosophila melanogaster GN=Naam PE=2 SV=3	0.96	0.92	1.04	0.89	1.07	1.03	1.08	23	7	40	28.7	0.0452717	0.9525	1.06	1.11286	1.34417
307.1	tr|Q9VF51|Q9VF51_DROME	CG6045 OS=Drosophila melanogaster GN=CG6045-RA PE=2 SV=1	0.95	0.86	1.03	0.88	1.17	1	1.11	92	26	138	33.4	0.0456591	0.93	1.09333	1.17563	1.34047
1172.1	tr|O18333|O18333_DROME	GH01619p OS=Drosophila melanogaster GN=Rab2 PE=2 SV=1	0.99	0.96	1.01	0.96	1.01	1.02	1.05	24	7	24	51	0.0456591	0.98	1.02667	1.04762	1.34047
2120.1	sp|Q9VIM5|ARPC2_DROME	Probable actin-related protein 2/3 complex subunit 2 OS=Drosophila melanogaster GN=Arc-p34 PE=1 SV=2	0.97	0.97	1.02	0.96	1.03	1.04	1.01	10	6	35	14.2	0.0456591	0.98	1.02667	1.04762	1.34047
588.1	tr|O76742|O76742_DROME	CG5915 protein OS=Drosophila melanogaster GN=Rab7 PE=2 SV=1	0.98	0.97	0.96	0.98	0.98	1.06	1.06	50	9	23	107.2	0.0458228	0.9725	1.03333	1.06255	1.33892
2365.1	sp|P51592|HYD_DROME	E3 ubiquitin-protein ligase hyd OS=Drosophila melanogaster GN=hyd PE=1 SV=3	0.96	0.94	1.03	0.95	1.05	1.02	1.04	8	6	319	1.3	0.0459862	0.97	1.03667	1.06873	1.33737
41.1	tr|E1JGY6|E1JGY6_DROME	Lethal (2) 01289, isoform F OS=Drosophila melanogaster GN=l(2)01289 PE=4 SV=1	0.98	0.91	1.02	0.96	1.04	1.03	1.05	720	62	205	175.9	0.0460971	0.9675	1.04	1.07494	1.33633
2947.1	tr|Q9VSF0|Q9VSF0_DROME	Autophagy-specific gene 18, isoform A OS=Drosophila melanogaster GN=Atg18 PE=2 SV=2	1	0.89	0.98	0.94	1.1	1.1	0.99	5	5	42	6	0.0461425	0.9525	1.06333	1.11636	1.3359
3988.1	tr|A1Z6T8|A1Z6T8_DROME	Tetraspanin 42Eh, isoform B OS=Drosophila melanogaster GN=Tsp42Eh PE=4 SV=1	0.97	0.86	1	0.98	1.02	1.07	1.1	3	1	26	5.8	0.0461425	0.9525	1.06333	1.11636	1.3359
1909.1	tr|A1Z8H7|A1Z8H7_DROME	Cuticular protein 47Ef, isoform A OS=Drosophila melanogaster GN=Cpr47Ef PE=4 SV=1	1.06	0.82	0.94	0.79	1.12	1.04	1.23	12	5	51	11.9	0.0462329	0.9025	1.13	1.25208	1.33505
2166.1	tr|Q9VUX0|Q9VUX0_DROME	CG5830 OS=Drosophila melanogaster GN=CG5830-RA PE=2 SV=2	0.98	0.91	1	0.93	1.11	1.07	0.99	10	4	38	13.2	0.0462924	0.955	1.05667	1.10646	1.33449
1835.1	tr|A1ZB68|A1ZB68_DROME	FI01423p OS=Drosophila melanogaster GN=GstE3 PE=2 SV=1	1	0.93	1.01	0.93	1.01	1.06	1.07	13	4	25	26.1	0.0462974	0.9675	1.04667	1.08183	1.33444
5514.1	tr|Q7PLJ7|Q7PLJ7_DROME	CG17684 OS=Drosophila melanogaster GN=CG17684 PE=4 SV=4	0.92	0.88	0.92	0.97	1.25	1.05	1	1	1	97	0.5	0.0465945	0.9225	1.1	1.19241	1.33167
2552.1	tr|Q9VX17|Q9VX17_DROME	CG6398 OS=Drosophila melanogaster GN=CG6398 PE=2 SV=1	0.88	0.92	1.01	1.01	1.08	1.04	1.06	7	5	33	10.7	0.0467374	0.955	1.06	1.10995	1.33034
57.3	sp|P29844|HSP7C_DROME	Heat shock 70 kDa protein cognate 3 OS=Drosophila melanogaster GN=Hsc70-3 PE=2 SV=2	0.99	0.89	1.03	0.91	1.08	1.05	1.05	277	29	72	191.8	0.0467374	0.955	1.06	1.10995	1.33034
4553.1	tr|A8JV30|A8JV30_DROME	CG34327 OS=Drosophila melanogaster GN=CG34327 PE=4 SV=1	0.99	1.17	0.98	1.16	0.96	0.88	0.86	2	1	20	5	0.0468238	1.075	0.9	0.837209	1.32953
4191.1	tr|Q9VSJ5|Q9VSJ5_DROME	CG13667, isoform A OS=Drosophila melanogaster GN=CG13667 PE=2 SV=1	0.95	0.88	0.91	0.97	1.24	1.02	1.03	2	2	66	1.5	0.047114	0.9275	1.09667	1.18239	1.32685
5553.1	tr|A2RVF0|A2RVF0_DROME	ABC transporter expressed in trachea, isoform C OS=Drosophila melanogaster GN=Atet PE=2 SV=1	0.98	0.94	0.98	1	1.02	1.08	1.01	1	1	90	0.6	0.0473835	0.975	1.03667	1.06325	1.32437
854.1	tr|Q9W3W4|Q9W3W4_DROME	COQ7 OS=Drosophila melanogaster GN=COQ7 PE=2 SV=2	0.88	0.88	1.07	0.89	1.15	1.03	1.1	34	6	24	70.7	0.0474436	0.93	1.09333	1.17563	1.32382
3503.1	sp|Q8IRH5|Y2199_DROME	Zinc finger protein CG2199 OS=Drosophila melanogaster GN=CG2199 PE=1 SV=1	0.94	0.86	1.02	0.97	1.09	1.01	1.12	4	2	82	2.4	0.0477387	0.9475	1.07333	1.13281	1.32113
1917.1	tr|Q9VGK3|Q9VGK3_DROME	CG14715 OS=Drosophila melanogaster GN=CG14715 PE=2 SV=1	0.95	0.99	0.99	0.98	1.05	1.05	0.99	12	5	15	40.6	0.0478195	0.9775	1.03	1.05371	1.3204
1728.1	tr|Q95RA9|Q95RA9_DROME	CG9796 OS=Drosophila melanogaster GN=CG9796 PE=2 SV=1	1	0.91	1	0.97	1.06	1.02	1.04	14	5	28	25.3	0.0480906	0.97	1.04	1.07216	1.31794
2464.1	tr|Q9VD64|Q9VD64_DROME	Dead end OS=Drosophila melanogaster GN=dnd PE=2 SV=2	1.07	1.03	1.04	1	0.97	1	0.9	8	4	20	19.9	0.048116	1.035	0.956667	0.924316	1.31771
128.2	sp|Q9W1V6|PRPD3_DROME	Diphenoloxidase subunit A3 OS=Drosophila melanogaster GN=Dox-A3 PE=1 SV=1	1.01	0.89	1.01	0.85	1.07	1.04	1.12	20	2	79	12.6	0.048198	0.94	1.07667	1.14539	1.31697
2228.1	tr|Q9V4C2|Q9V4C2_DROME	RhoGAP102A, isoform E OS=Drosophila melanogaster GN=RhoGAP102A PE=2 SV=3	1.02	0.91	0.99	0.89	1.09	1.1	1.01	9	7	129	3.5	0.0483183	0.9525	1.06667	1.11986	1.31589
3408.1	sp|Q9VH14|TIMP_DROME	Tissue inhibitor of metalloproteases OS=Drosophila melanogaster GN=Timp PE=2 SV=1	0.98	0.8	1	0.92	1.19	1.06	1.04	4	3	24	8.3	0.0486567	0.925	1.09667	1.18559	1.31286
4034.1	tr|Q95TP0|Q95TP0_DROME	CG31961, isoform A OS=Drosophila melanogaster GN=CG31961 PE=2 SV=1	0.89	0.9	1.06	0.95	1.07	1.1	1.05	2	2	40	2.5	0.0489563	0.95	1.07333	1.12982	1.31019
2209.1	sp|Q9VF87|CYFIP_DROME	Cytoplasmic FMR1-interacting protein OS=Drosophila melanogaster GN=Sra-1 PE=1 SV=1	0.99	0.89	1.01	0.92	1.1	1.09	1	9	8	149	3	0.0490587	0.9525	1.06333	1.11636	1.30928
4710.1	tr|Q9VD66|Q9VD66_DROME	Female-specific independent of transformer OS=Drosophila melanogaster GN=fit PE=2 SV=1	0.87	0.69	1.05	0.73	1.23	1.45	0.98	1	1	14	3.6	0.0491208	0.835	1.22	1.46108	1.30873
1756.1	tr|Q0E8R1|Q0E8R1_DROME	FI07211p OS=Drosophila melanogaster GN=vir-1 PE=2 SV=1	0.98	0.9	1.01	0.82	1.08	1.02	1.19	14	3	49	14.4	0.0492039	0.9275	1.09667	1.18239	1.308
5273.1	tr|Q9VU77|Q9VU77_DROME	CG10133 OS=Drosophila melanogaster GN=CG10133 PE=2 SV=1	1.05	0.8	0.9	0.97	1.13	1.07	1.09	1	1	36	1.4	0.0492102	0.93	1.09667	1.17921	1.30794
480.1	tr|E1JIZ0|E1JIZ0_DROME	Scribbled, isoform L OS=Drosophila melanogaster GN=scrib PE=4 SV=1	0.99	0.91	1.02	0.94	1.07	1.05	1.02	61	34	281	10.9	0.0492381	0.965	1.04667	1.08463	1.3077
2125.1	sp|Q9V9L1|CP6W1_DROME	Probable cytochrome P450 6w1 OS=Drosophila melanogaster GN=Cyp6w1 PE=2 SV=1	1.04	0.89	0.94	0.79	1.11	1.02	1.21	10	6	59	8.4	0.0493004	0.915	1.11333	1.21676	1.30715
1282.1	sp|Q8T390|SH3G3_DROME	Endophilin-A OS=Drosophila melanogaster GN=endoA PE=1 SV=1	0.96	0.92	1.02	0.96	1.09	1.06	1	21	8	41	25.4	0.0494021	0.965	1.05	1.08808	1.30625
2951.1	sp|Q9VMX1|KBP_DROME	Protein KBP homolog OS=Drosophila melanogaster GN=CG14043 PE=1 SV=1	0.91	0.92	1.06	0.89	1.13	1.05	1.05	5	5	70	3.6	0.049581	0.945	1.07667	1.13933	1.30468
2584.1	tr|Q8IQW7|Q8IQW7_DROME	Gamma-tubulin ring protein 84, isoform A OS=Drosophila melanogaster GN=Grip84 PE=2 SV=1	0.97	0.94	1.02	0.96	1.01	1.07	1.03	7	5	107	3.3	0.0500121	0.9725	1.03667	1.06598	1.30092
5626.1	tr|Q0KI32|Q0KI32_DROME	CG34148, isoform A OS=Drosophila melanogaster GN=CG34148 PE=4 SV=1	1.16	1.11	1.1	1	1.04	0.85	0.73	1	1	13	3.9	0.0500429	1.0925	0.873333	0.79939	1.30066
127.1	tr|Q0E980|Q0E980_DROME	CG8547, isoform C OS=Drosophila melanogaster GN=CG8547 PE=4 SV=2	0.99	0.93	1.02	0.92	1.07	1.03	1.03	216	22	68	158.9	0.0500706	0.965	1.04333	1.08117	1.30042
4308.1	sp|Q9V3D6-2|CPSF2_DROME	Isoform B of Probable cleavage and polyadenylation specificity factor subunit 2 OS=Drosophila melanogaster GN=Cpsf100	0.94	0.94	0.98	0.85	1.15	1.17	0.96	2	2	75	1.3	0.0505888	0.9275	1.09333	1.1788	1.29595
3835.1	tr|Q9W2N5|Q9W2N5_DROME	CG3295 OS=Drosophila melanogaster GN=CG3295 PE=2 SV=1	0.94	0.93	1.03	0.84	1.15	1	1.11	3	2	49	3	0.0508598	0.935	1.08667	1.16221	1.29363
1725.1	tr|Q7KVR7|Q7KVR7_DROME	AP-1gamma, isoform B OS=Drosophila melanogaster GN=AP-1gamma PE=2 SV=1	0.99	0.92	0.97	1	1.02	1.09	1.02	14	6	106	6.6	0.0510173	0.97	1.04333	1.0756	1.29228
1531.1	sp|Q9VHS2|COX7A_DROME	Probable cytochrome c oxidase subunit 7A, mitochondrial OS=Drosophila melanogaster GN=CG9603 PE=1 SV=1	1.06	1.02	1.05	0.99	1	0.91	0.96	17	4	10	85.9	0.0510173	1.03	0.956667	0.928803	1.29228
2886.1	tr|Q2PDZ0|Q2PDZ0_DROME	PHCl, isoform E OS=Drosophila melanogaster GN=pHCl PE=4 SV=1	0.97	0.98	0.97	0.9	1.04	1	1.14	6	3	85	3.5	0.0510863	0.955	1.06	1.10995	1.2917
3521.1	sp|Q9VJD2|LTOR3_DROME	Ragulator complex protein LAMTOR3 homolog OS=Drosophila melanogaster GN=CG5110 PE=1 SV=1	0.91	0.94	0.99	1.01	1	1.07	1.08	4	1	14	14.5	0.05113	0.9625	1.05	1.09091	1.29132
2331.1	tr|Q7JRA7|Q7JRA7_DROME	CG15096, isoform B OS=Drosophila melanogaster GN=CG15096 PE=2 SV=1	0.97	0.8	1.06	0.86	1.11	1.12	1.07	9	3	52	8.7	0.0511594	0.9225	1.1	1.19241	1.29107
5325.1	tr|Q9VGG0|Q9VGG0_DROME	CG3281 OS=Drosophila melanogaster GN=CG3281 PE=2 SV=1	1.11	0.69	0.87	0.74	1.36	1.08	1.13	1	1	62	0.8	0.0513332	0.8525	1.19	1.39589	1.2896
263.1	sp|P12080|ITA2_DROME	Integrin alpha-PS2 OS=Drosophila melanogaster GN=if PE=1 SV=2	0.99	0.92	1.01	0.96	1.06	1.01	1.04	102	15	154	33.1	0.0513762	0.97	1.03667	1.06873	1.28924
729.2	sp|Q9VE00|C12A4_DROME	Probable cytochrome P450 12a4, mitochondrial OS=Drosophila melanogaster GN=Cyp12a4 PE=1 SV=2	1	0.91	1.02	0.85	1.1	1.09	1.03	34	13	62	27.5	0.0514751	0.945	1.07333	1.1358	1.2884
2378.1	tr|Q0E8N6|Q0E8N6_DROME	Clumsy, isoform B OS=Drosophila melanogaster GN=clumsy PE=4 SV=1	1	0.86	0.99	0.92	1.17	1.04	1.03	8	6	113	3.5	0.0517553	0.9425	1.08	1.14589	1.28605
725.1	tr|Q9VTC3|Q9VTC3_DROME	CG6409 OS=Drosophila melanogaster GN=CG6409 PE=2 SV=2	0.95	0.88	1.05	0.87	1.03	1.07	1.16	41	5	40	50.9	0.0518394	0.9375	1.08667	1.15911	1.28534
1821.1	sp|P52486|UBCD4_DROME	Ubiquitin-conjugating enzyme E2-22 kDa OS=Drosophila melanogaster GN=UbcD4 PE=1 SV=2	0.91	0.92	1.02	0.97	1.06	1	1.11	13	5	22	28.9	0.0520948	0.955	1.05667	1.10646	1.28321
1689.1	tr|Q9VP17|Q9VP17_DROME	CG7177 OS=Drosophila melanogaster GN=Wnk PE=4 SV=4	0.91	0.92	1.04	0.95	1.11	1.05	1.02	14	9	266	2.6	0.0521814	0.955	1.06	1.10995	1.28248
4748.1	tr|Q9VZG3|Q9VZG3_DROME	CG1295 OS=Drosophila melanogaster GN=CG1295 PE=2 SV=1	1.26	1.03	0.99	1.04	0.9	0.92	0.86	1	1	21	2.3	0.0521943	1.08	0.893333	0.82716	1.28238
3959.1	tr|Q0E8D0|Q0E8D0_DROME	CG34116 OS=Drosophila melanogaster GN=CG15881-RB PE=2 SV=1	0.73	0.88	1.01	0.9	0.96	1.21	1.31	3	1	24	6.2	0.0523871	0.88	1.16	1.31818	1.28078
4539.1	tr|A8JQU5|A8JQU5_DROME	CG34297 OS=Drosophila melanogaster GN=CG34297-RA PE=2 SV=1	0.86	0.91	1.06	0.91	1.06	1.16	1.04	2	1	27	3.6	0.0524345	0.935	1.08667	1.16221	1.28038
2870.1	tr|Q9VXG0|Q9VXG0_DROME	CG9947 OS=Drosophila melanogaster GN=CG9947-RA PE=2 SV=1	0.99	0.96	1	0.99	1.01	1.05	1.01	6	3	40	7.6	0.0524862	0.985	1.02333	1.03892	1.27995
5082.1	tr|Q9VZJ3|Q9VZJ3_DROME	GH01794p OS=Drosophila melanogaster GN=Rcd5 PE=2 SV=1	0.77	1	0.94	0.99	1.17	1.04	1.1	1	1	63	0.8	0.0524913	0.925	1.10333	1.19279	1.27991
4344.1	sp|Q9VUR0|UFSP2_DROME	Probable Ufm1-specific protease 2 OS=Drosophila melanogaster GN=UFSP2 PE=2 SV=1	0.96	0.95	0.99	0.93	1.01	1.02	1.15	2	1	68	1.5	0.0525651	0.9575	1.06	1.10705	1.2793
828.1	sp|P61209|ARF1_DROME	ADP-ribosylation factor 1 OS=Drosophila melanogaster GN=Arf79F PE=1 SV=2	1	0.95	0.96	0.99	0.99	1.05	1.06	35	8	21	84.6	0.0527081	0.975	1.03333	1.05983	1.27812
2482.1	tr|Q9W228|Q9W228_DROME	RE07815p OS=Drosophila melanogaster GN=Ugt58Fa PE=2 SV=3	0.98	0.95	0.95	0.97	1.13	1.01	1.01	8	3	59	6.8	0.0527081	0.9625	1.05	1.09091	1.27812
1500.1	tr|O77434|O77434_DROME	EG:34F3.8 protein OS=Drosophila melanogaster GN=Sec22 PE=2 SV=2	1.02	0.96	0.98	0.93	1.04	1.06	1.01	17	7	25	34.5	0.0529433	0.9725	1.03667	1.06598	1.27619
2771.1	tr|E1JH90|E1JH90_DROME	Short spindle 4, isoform F OS=Drosophila melanogaster GN=Patronin PE=4 SV=1	1.02	0.83	0.97	0.96	1.11	1.07	1.04	6	5	188	1.6	0.0529433	0.945	1.07333	1.1358	1.27619
1035.1	sp|Q960W6|FACR3_DROME	Putative fatty acyl-CoA reductase CG8306 OS=Drosophila melanogaster GN=CG8306 PE=2 SV=1	0.97	0.95	1.02	0.93	1.07	1	1.05	28	8	58	24	0.0529488	0.9675	1.04	1.07494	1.27614
692.1	tr|Q9W0L6|Q9W0L6_DROME	CG13907 OS=Drosophila melanogaster GN=CG13907 PE=2 SV=1	0.95	0.92	1.01	0.99	1.07	1.06	1	42	13	88	23.9	0.0529607	0.9675	1.04333	1.07838	1.27605
4817.1	tr|Q5BI03|Q5BI03_DROME	CG8155 OS=Drosophila melanogaster GN=CG8155 PE=2 SV=1	1.04	0.78	0.97	0.76	1.31	1.09	1.06	1	1	122	0.4	0.0529678	0.8875	1.15333	1.29953	1.27599
4242.1	sp|Q24157|BRN_DROME	Beta-1,3-galactosyltransferase brn OS=Drosophila melanogaster GN=brn PE=1 SV=2	1.02	0.87	0.96	0.82	1.22	1.1	1	2	2	38	2.7	0.0532463	0.9175	1.10667	1.20618	1.27371
207.1	tr|Q9VLA0|Q9VLA0_DROME	CG15828, isoform A OS=Drosophila melanogaster GN=CG15828 PE=2 SV=1	0.98	0.89	1.04	0.91	1.04	1.06	1.08	128	53	495	12.9	0.0532793	0.955	1.06	1.10995	1.27344
5423.1	tr|Q9W129|Q9W129_DROME	CG3640 OS=Drosophila melanogaster GN=CG3640 PE=2 SV=1	0.93	0.88	1.05	0.91	1.09	1.12	1.01	1	1	34	1.5	0.0533077	0.9425	1.07333	1.13882	1.27321
244.1	tr|Q9VG44|Q9VG44_DROME	CG6225, isoform A OS=Drosophila melanogaster GN=CG6225 PE=2 SV=1	1	0.94	1.02	0.95	1.05	1.03	1.03	109	20	80	68	0.0534623	0.9775	1.03667	1.06053	1.27195
5134.1	tr|Q24216|Q24216_DROME	Cyclin-dependent kinase 7 OS=Drosophila melanogaster GN=Cdk7 PE=2 SV=1	0.8	0.86	1.01	0.95	1.29	1.06	1.03	1	1	40	1.3	0.0534773	0.905	1.12667	1.24494	1.27183
4961.1	sp|Q9VJ34|GSTCD_DROME	Glutathione S-transferase C-terminal domain-containing protein homolog OS=Drosophila melanogaster GN=CG10428 PE=2 SV=2	0.89	0.94	1.04	0.92	1.13	1.09	1	1	1	66	0.8	0.0538246	0.9475	1.07333	1.13281	1.26902
941.1	tr|Q9VKQ2|Q9VKQ2_DROME	CG17127, isoform A OS=Drosophila melanogaster GN=CG17127 PE=2 SV=1	0.94	0.95	0.93	1.02	1.03	1.12	1.01	31	3	11	144.1	0.0539325	0.96	1.05333	1.09722	1.26815
1470.1	tr|Q9VZS1|Q9VZS1_DROME	CG17746, isoform A OS=Drosophila melanogaster GN=CG17746 PE=2 SV=1	1	0.9	1.01	0.93	1.09	1.06	1.01	18	4	41	22	0.0539325	0.96	1.05333	1.09722	1.26815
3794.1	tr|Q9VCK1|Q9VCK1_DROME	CG10157 OS=Drosophila melanogaster GN=CG10157 PE=2 SV=1	0.99	0.78	1.78	1.83	0.61	0.56	0.45	3	2	23	6.4	0.0539635	1.345	0.54	0.401487	1.2679
3467.1	tr|Q4QPR8|Q4QPR8_DROME	CG14483 OS=Drosophila melanogaster GN=CG14483 PE=2 SV=1	0.85	0.83	1.05	0.83	1.33	1.03	1.07	4	2	10	20.2	0.0539711	0.89	1.14333	1.28464	1.26784
1401.1	tr|Q9VQX6|Q9VQX6_DROME	CG3702 OS=Drosophila melanogaster GN=CG3702 PE=2 SV=2	0.96	0.88	1.04	0.89	1.15	1.04	1.04	19	7	74	12.9	0.054001	0.9425	1.07667	1.14235	1.2676
3880.1	tr|Q8IPT0|Q8IPT0_DROME	CG32441, isoform C OS=Drosophila melanogaster GN=CG32441 PE=2 SV=2	1.13	0.96	1.17	1.01	0.91	0.96	0.85	3	2	25	6	0.0541765	1.0675	0.906667	0.849336	1.26619
1833.1	sp|Q9Y0Y7|LANC3_DROME	LanC-like protein 3 homolog OS=Drosophila melanogaster GN=CG2061 PE=1 SV=1	0.99	0.84	1	0.97	1.08	1.03	1.09	13	4	48	13.7	0.0544901	0.95	1.06667	1.12281	1.26368
3342.1	tr|Q9VPJ0|Q9VPJ0_DROME	CG11377 OS=Drosophila melanogaster GN=CG11377 PE=2 SV=1	0.94	0.88	1.02	0.87	1.06	1.01	1.23	4	3	41	4.9	0.0546257	0.9275	1.1	1.18598	1.2626
4369.1	tr|Q9W337|Q9W337_DROME	CG32700, isoform A OS=Drosophila melanogaster GN=CG32700 PE=2 SV=2	0.89	0.93	1.05	0.91	1.13	1.08	1.01	2	1	23	4.3	0.0551545	0.945	1.07333	1.1358	1.25842
111.2	tr|E6EK18|E6EK18_DROME	Plasma membrane calcium ATPase, isoform R OS=Drosophila melanogaster GN=PMCA PE=3 SV=1	0.96	0.9	1.04	0.94	1.07	1.03	1.05	244	30	133	91.5	0.0551763	0.96	1.05	1.09375	1.25825
2264.1	sp|Q960X8|HRS_DROME	Hepatocyte growth factor-regulated tyrosine kinase substrate OS=Drosophila melanogaster GN=Hrs PE=1 SV=1	0.98	0.95	0.98	0.97	1.03	1.1	0.99	9	6	85	5.3	0.0554829	0.97	1.04	1.07216	1.25584
2569.1	tr|Q9VIV2|Q9VIV2_DROME	LD45403p OS=Drosophila melanogaster GN=swm PE=2 SV=1	0.83	1.01	1.02	0.89	1.08	1.14	1.04	7	5	116	3	0.0556557	0.9375	1.08667	1.15911	1.25449
3775.1	tr|Q9VCH7|Q9VCH7_DROME	CG10208 OS=Drosophila melanogaster GN=CG10208 PE=2 SV=1	1.29	0.58	0.57	0.62	1.19	1.26	1.49	3	2	31	4.8	0.0556674	0.765	1.31333	1.71678	1.2544
2374.1	tr|Q8IQS4|Q8IQS4_DROME	CG32191 OS=Drosophila melanogaster GN=CG32191 PE=4 SV=1	1.01	0.93	0.99	0.85	1.06	1.14	1.02	8	6	63	6.4	0.0558937	0.945	1.07333	1.1358	1.25264
3915.1	tr|A8JNV2|A8JNV2_DROME	CG34253 OS=Drosophila melanogaster GN=CG34253 PE=4 SV=1	0.96	0.84	1.03	0.95	1.11	1.09	1.02	3	1	12	12	0.0558937	0.945	1.07333	1.1358	1.25264
955.1	tr|Q9VAJ9|Q9VAJ9_DROME	CG1907 OS=Drosophila melanogaster GN=CG1907 PE=2 SV=1	0.9	0.96	1	1	1.05	1.01	1.07	30	10	35	43.4	0.0559915	0.965	1.04333	1.08117	1.25188
685.1	tr|Q8I725|Q8I725_DROME	CG1236 OS=Drosophila melanogaster GN=CG1236 PE=2 SV=2	0.99	0.93	1.01	0.97	1.06	1.06	1	43	6	38	56.1	0.0560124	0.975	1.04	1.06667	1.25172
111.1	tr|Q9V4C7|Q9V4C7_DROME	Plasma membrane calcium ATPase, isoform I OS=Drosophila melanogaster GN=PMCA PE=3 SV=5	0.97	0.91	1.04	0.94	1.07	1.03	1.05	247	30	133	93	0.0561022	0.965	1.05	1.08808	1.25102
2340.1	sp|Q9U6A0-2|NCKX_DROME	Isoform A of Sodium/potassium/calcium exchanger Nckx30C OS=Drosophila melanogaster GN=Nckx30C	0.9	0.89	1.05	0.95	1.13	1.07	1.02	9	2	92	4.9	0.0561288	0.9475	1.07333	1.13281	1.25081
3522.1	sp|Q8INK9-6|MSRB_DROME	Isoform G of Methionine-R-sulfoxide reductase B1 OS=Drosophila melanogaster GN=SelR	0.97	0.96	0.96	0.96	1.02	1.14	1	4	1	18	11.4	0.05616	0.9625	1.05333	1.09437	1.25057
8.1	sp|Q9V496|APLP_DROME	Apolipophorins OS=Drosophila melanogaster GN=Rfabg PE=1 SV=2	0.96	0.92	1.05	0.92	1.06	1.04	1.06	2291	140	372	307.6	0.05616	0.9625	1.05333	1.09437	1.25057
708.1	tr|Q9VKY2|Q9VKY2_DROME	CG5366 OS=Drosophila melanogaster GN=CG5366 PE=2 SV=1	0.97	0.96	1.02	0.95	1.04	1	1.06	41	17	139	14.7	0.0562785	0.975	1.03333	1.05983	1.24966
3048.1	tr|Q9VDD5|Q9VDD5_DROME	CG10824 OS=Drosophila melanogaster GN=CG10824 PE=2 SV=2	1.06	0.8	0.97	0.79	1.21	1.14	1.03	5	3	62	4	0.0564472	0.905	1.12667	1.24494	1.24836
676.1	tr|Q9VW59|Q9VW59_DROME	LD16419p OS=Drosophila melanogaster GN=RhoGDI PE=2 SV=1	0.93	0.92	1.04	0.97	1.05	1.06	1.03	43	10	23	92.7	0.0564979	0.965	1.04667	1.08463	1.24797
22.1	sp|P13607|ATNA_DROME	Sodium/potassium-transporting ATPase subunit alpha OS=Drosophila melanogaster GN=Atpalpha PE=1 SV=3	1.01	0.91	1.01	0.93	1.06	1.02	1.06	1205	42	116	521.5	0.0564979	0.965	1.04667	1.08463	1.24797
2033.1	tr|Q9VL57|Q9VL57_DROME	CG4658, isoform A OS=Drosophila melanogaster GN=CG4658 PE=2 SV=1	0.94	0.94	1.02	0.96	1.1	1	1.04	11	5	58	9.4	0.0564979	0.965	1.04667	1.08463	1.24797
277.1	sp|Q9VA73-3|CMC_DROME	Isoform 3 of Calcium-binding mitochondrial carrier protein Aralar1 OS=Drosophila melanogaster GN=aralar1	0.99	0.92	1.03	0.92	1.05	1.03	1.06	99	22	75	66.1	0.0564979	0.965	1.04667	1.08463	1.24797
3065.1	tr|Q7JRE4|Q7JRE4_DROME	MAN1, isoform A OS=Drosophila melanogaster GN=MAN1 PE=2 SV=1	1	0.9	0.99	0.93	1.07	0.99	1.12	5	3	74	3.4	0.0565882	0.955	1.06	1.10995	1.24727
413.1	tr|Q9VKM3|Q9VKM3_DROME	Lethal (2) 06225, isoform A OS=Drosophila melanogaster GN=l(2)06225 PE=2 SV=1	0.97	0.94	1	1	1	1.04	1.05	72	5	11	331.3	0.0565882	0.9775	1.03	1.05371	1.24727
2493.1	sp|Q9XZ63|ARMET_DROME	Mesencephalic astrocyte-derived neurotrophic factor homolog OS=Drosophila melanogaster GN=Manf PE=1 SV=2	0.83	0.94	1.01	0.93	1.04	1.03	1.23	8	3	20	19.9	0.0566719	0.9275	1.1	1.18598	1.24663
5436.1	sp|Q9VDD9|RMJ1B_DROME	Putative ribosomal RNA methyltransferase CG7009 OS=Drosophila melanogaster GN=CG7009 PE=1 SV=1	1.01	0.94	1	0.8	1.11	1.05	1.09	1	1	36	1.4	0.0567086	0.9375	1.08333	1.15556	1.24635
111.4	tr|Q59DP9|Q59DP9_DROME	Plasma membrane calcium ATPase, isoform J OS=Drosophila melanogaster GN=PMCA PE=3 SV=3	0.96	0.9	1.04	0.94	1.08	1.02	1.06	209	25	139	75.4	0.0567265	0.96	1.05333	1.09722	1.24621
125.2	tr|E2QD99|E2QD99_DROME	CG34417, isoform I OS=Drosophila melanogaster GN=CG34417 PE=4 SV=1	0.95	0.9	1.04	0.95	1.09	1.03	1.04	166	57	397	20.9	0.0567265	0.96	1.05333	1.09722	1.24621
3534.1	tr|Q86B58|Q86B58_DROME	CG33127 OS=Drosophila melanogaster GN=CG33127 PE=2 SV=1	0.89	0.67	1.12	0.71	1.26	1.34	1.02	4	1	31	6.5	0.0568625	0.8475	1.20667	1.4238	1.24517
5253.1	tr|Q8SX24|Q8SX24_DROME	CG18048 OS=Drosophila melanogaster GN=CG18048 PE=2 SV=1	0.8	0.85	1.09	0.88	1.01	1.19	1.18	1	1	50	1	0.0569438	0.905	1.12667	1.24494	1.24455
2077.1	tr|E1JI78|E1JI78_DROME	Fhos, isoform C OS=Drosophila melanogaster GN=Fhos PE=4 SV=1	1.18	1.01	1.02	1.04	0.95	0.97	0.84	10	10	277	1.8	0.0569684	1.0625	0.92	0.865882	1.24437
936.1	tr|Q76NQ0|Q76NQ0_DROME	CG33303 OS=Drosophila melanogaster GN=CG33303 PE=2 SV=1	1.01	0.92	1.01	0.93	1.06	1.05	1.02	31	7	52	30	0.0571908	0.9675	1.04333	1.07838	1.24267
1383.1	tr|Q9V3A8|Q9V3A8_DROME	Ergic53, isoform A OS=Drosophila melanogaster GN=ergic53 PE=2 SV=1	0.92	0.89	1.03	0.99	1.05	1.03	1.1	19	10	58	16.5	0.057194	0.9575	1.06	1.10705	1.24265
370.1	sp|Q8T079|GLYR1_DROME	Putative oxidoreductase GLYR1 homolog OS=Drosophila melanogaster GN=CG4747 PE=1 SV=1	0.95	0.95	1	0.93	1.06	1.13	0.98	79	18	65	60.6	0.0573084	0.9575	1.05667	1.10357	1.24178
5664.1	tr|Q9VGE6|Q9VGE6_DROME	GH14381p OS=Drosophila melanogaster GN=KLHL18 PE=2 SV=1	0.83	0.92	0.92	1.01	1.01	1.26	1.06	1	1	60	0.8	0.0573441	0.92	1.11	1.20652	1.24151
4936.1	tr|Q8SWT2|Q8SWT2_DROME	CG9323 OS=Drosophila melanogaster GN=CG9323 PE=2 SV=1	1.04	0.93	0.86	0.82	1.24	1.12	0.99	1	1	108	0.5	0.0573763	0.9125	1.11667	1.22374	1.24127
3244.1	tr|Q9VDX6|Q9VDX6_DROME	CG18493 OS=Drosophila melanogaster GN=CG18493 PE=2 SV=2	0.86	0.75	1.06	0.94	1.03	1.23	1.12	4	4	54	3.7	0.0574316	0.9025	1.12667	1.24838	1.24085
855.1	sp|P61851|SODC_DROME	Superoxide dismutase [Cu-Zn] OS=Drosophila melanogaster GN=Sod PE=1 SV=2	0.99	0.82	1	0.95	1.04	1.05	1.14	34	4	16	108.3	0.0579208	0.94	1.07667	1.14539	1.23717
836.1	sp|P18935|CYB_DROME	Cytochrome b OS=Drosophila melanogaster GN=mt:Cyt-b PE=3 SV=1	0.88	0.89	1.05	0.95	1.09	1.01	1.13	35	5	43	40.5	0.0580624	0.9425	1.07667	1.14235	1.23611
1353.1	tr|Q9VZF9|Q9VZF9_DROME	Cuticular protein 64Ad OS=Drosophila melanogaster GN=Cpr64Ad PE=2 SV=2	1.03	0.87	0.99	0.91	1.1	1.08	1.02	20	6	24	41.2	0.0580726	0.95	1.06667	1.12281	1.23603
452.1	tr|A4V0B5|A4V0B5_DROME	Nervana 2, isoform F OS=Drosophila melanogaster GN=nrv2 PE=3 SV=1	0.91	0.97	1.01	0.97	1.03	1.01	1.1	66	9	37	88.6	0.0583293	0.965	1.04667	1.08463	1.23411
5217.1	tr|Q9W062|Q9W062_DROME	GH07619p OS=Drosophila melanogaster GN=Mfap1 PE=2 SV=1	0.96	0.92	0.92	1.01	1.16	1.03	1.01	1	1	56	0.9	0.0585434	0.9525	1.06667	1.11986	1.23252
571.2	tr|A1ZB72|A1ZB72_DROME	Glutathione S transferase E7 OS=Drosophila melanogaster GN=GstE7 PE=3 SV=1	0.87	0.81	1.09	0.77	1.17	1	1.29	9	3	25	17.6	0.058572	0.885	1.15333	1.3032	1.23231
286.1	sp|Q9VSA3|ACADM_DROME	Probable medium-chain specific acyl-CoA dehydrogenase, mitochondrial OS=Drosophila melanogaster GN=CG12262 PE=1 SV=1	1	0.89	1.01	0.89	1.09	1	1.1	97	16	46	105.8	0.058766	0.9475	1.06333	1.12225	1.23087
1363.2	tr|Q9VVB8|Q9VVB8_DROME	Limpet, isoform A OS=Drosophila melanogaster GN=Lmpt PE=2 SV=1	0.99	0.95	0.96	0.92	1.04	1.15	0.99	14	3	28	25.2	0.058805	0.955	1.06	1.10995	1.23059
5389.1	tr|Q7KT80|Q7KT80_DROME	CG31832 OS=Drosophila melanogaster GN=CG31832 PE=2 SV=1	0.72	0.87	0.85	1.01	1.08	1.02	1.44	1	1	22	2.3	0.0588624	0.8625	1.18	1.36812	1.23016
2527.1	sp|Q7K4B3|ELP2_DROME	Probable elongator complex protein 2 OS=Drosophila melanogaster GN=StIP PE=1 SV=1	0.97	0.88	1.04	0.92	1.11	1.03	1.05	7	7	89	3.9	0.0589342	0.9525	1.06333	1.11636	1.22963
748.1	tr|Q9VJ45|Q9VJ45_DROME	CG17322, isoform A OS=Drosophila melanogaster GN=BEST:LD25345 PE=2 SV=2	0.97	0.88	1.01	0.95	1.08	0.99	1.12	39	11	58	33.8	0.0589342	0.9525	1.06333	1.11636	1.22963
5486.1	tr|O97063|O97063_DROME	Ccp84Af OS=Drosophila melanogaster GN=Ccp84Af PE=2 SV=1	0.85	0.89	1.05	0.83	1.21	1.22	0.96	1	1	16	3.1	0.0591554	0.905	1.13	1.24862	1.22801
2744.1	sp|Q9W032|SGT1_DROME	Protein SGT1 homolog ecdysoneless OS=Drosophila melanogaster GN=ecd PE=1 SV=1	0.96	0.86	1.02	0.98	1.03	1.07	1.07	6	5	78	3.9	0.0591613	0.955	1.05667	1.10646	1.22796
2645.1	sp|P05031|DDC_DROME	Aromatic-L-amino-acid decarboxylase OS=Drosophila melanogaster GN=Ddc PE=1 SV=4	0.96	0.92	1.01	0.98	1.07	1.09	0.99	7	4	57	6.1	0.0593374	0.9675	1.05	1.08527	1.22667
4501.1	tr|Q7KUB3|Q7KUB3_DROME	Ecdysone-inducible gene E1, isoform A OS=Drosophila melanogaster GN=ImpE1 PE=2 SV=1	1.02	0.82	1	0.91	1.12	1.03	1.09	2	1	177	0.6	0.0593773	0.9375	1.08	1.152	1.22638
4868.1	sp|Q9VAD6|COG7_DROME	Conserved oligomeric Golgi complex subunit 7 OS=Drosophila melanogaster GN=Cog7 PE=1 SV=2	0.84	0.76	1.06	0.9	1.22	0.97	1.25	1	1	84	0.6	0.0594177	0.89	1.14667	1.28839	1.22608
1508.1	tr|A8DZ07|A8DZ07_DROME	CG4587, isoform B OS=Drosophila melanogaster GN=CG4587 PE=4 SV=1	1	0.9	0.99	0.95	1.1	1.07	0.99	17	7	136	6.3	0.059534	0.96	1.05333	1.09722	1.22524
4872.1	tr|Q7KTS4|Q7KTS4_DROME	Histone deacetylase OS=Drosophila melanogaster GN=Hdac3 PE=2 SV=1	0.92	0.91	1.06	0.86	1.14	1.1	1.01	1	1	50	1	0.0595835	0.9375	1.08333	1.15556	1.22487
111.3	tr|Q59DP8|Q59DP8_DROME	Plasma membrane calcium ATPase, isoform N OS=Drosophila melanogaster GN=PMCA PE=3 SV=3	0.96	0.9	1.04	0.94	1.07	1.02	1.06	211	26	123	85.5	0.0597	0.96	1.05	1.09375	1.22403
1277.1	sp|P25171|RCC1_DROME	Regulator of chromosome condensation OS=Drosophila melanogaster GN=Bj1 PE=1 SV=2	0.98	1.01	0.98	0.9	1.05	1.01	1.08	21	9	59	17.9	0.0598118	0.9675	1.04667	1.08183	1.22321
868.1	tr|Q9VYV3|Q9VYV3_DROME	CG1837 OS=Drosophila melanogaster GN=prtp PE=2 SV=2	0.97	0.94	1.03	0.96	1.05	1.02	1.03	33	12	47	35.4	0.0598717	0.975	1.03333	1.05983	1.22278
1843.1	tr|O97066|O97066_DROME	GM04682p OS=Drosophila melanogaster GN=twr PE=2 SV=1	0.96	0.95	0.99	1	1.01	1.08	1.01	13	4	21	31	0.0598717	0.975	1.03333	1.05983	1.22278
3194.1	tr|Q9W499|Q9W499_DROME	FI02809p OS=Drosophila melanogaster GN=RpL35 PE=2 SV=2	0.96	1.1	1.11	1.09	0.98	0.96	0.81	5	1	14	17.3	0.0600154	1.065	0.916667	0.86072	1.22174
2012.1	tr|Q8T3S1|Q8T3S1_DROME	AT02150p OS=Drosophila melanogaster GN=srpk79D PE=2 SV=1	0.99	0.9	1.03	0.94	1.04	1.05	1.05	11	6	85	6.5	0.0601658	0.965	1.04667	1.08463	1.22065
4980.1	sp|Q9VHM2|U505_DROME	UPF0505 protein CG8202 OS=Drosophila melanogaster GN=CG8202 PE=2 SV=3	0.9	0.83	1.1	0.87	1.15	1.09	1.07	1	1	108	0.5	0.0605419	0.925	1.10333	1.19279	1.21794
1263.1	tr|A8JNK1|A8JNK1_DROME	Ensconsin, isoform F OS=Drosophila melanogaster GN=ens PE=4 SV=1	0.98	0.91	1.04	0.9	1.09	1.07	1.02	21	14	136	7.7	0.0606899	0.9575	1.06	1.10705	1.21688
3934.1	sp|P53997|SET_DROME	Protein SET OS=Drosophila melanogaster GN=Set PE=1 SV=2	1.02	0.94	0.99	0.88	1.02	1.11	1.05	3	1	31	4.8	0.0606899	0.9575	1.06	1.10705	1.21688
5171.1	tr|Q7JUF8|Q7JUF8_DROME	Edem1, isoform A OS=Drosophila melanogaster GN=Edem1 PE=2 SV=1	0.84	0.87	1.04	1.01	1.07	1.08	1.1	1	1	111	0.5	0.060708	0.94	1.08333	1.15248	1.21675
3872.1	tr|Q9VI14|Q9VI14_DROME	CG33097, isoform A OS=Drosophila melanogaster GN=CG15187 PE=2 SV=2	1.01	0.91	0.96	0.91	1.14	1.11	0.97	3	2	85	1.8	0.0607643	0.9475	1.07333	1.13281	1.21635
3675.1	tr|Q7JUZ6|Q7JUZ6_DROME	DnaJ-related co-chaperone MRJ OS=Drosophila melanogaster GN=mrj PE=2 SV=1	0.9	0.78	1.1	0.87	1.17	1.08	1.09	3	3	29	5.2	0.0608912	0.9125	1.11333	1.22009	1.21545
3532.1	tr|B4ZJA7|B4ZJA7_DROME	Seminal fluid protein 87B OS=Drosophila melanogaster GN=Sfp87B PE=4 SV=1	0.87	0.92	1.07	0.88	1.16	1.06	1.04	4	1	10	19.7	0.060917	0.935	1.08667	1.16221	1.21526
2679.1	sp|Q7JUX9|MRRP1_DROME	Mitochondrial ribonuclease P protein 1 homolog OS=Drosophila melanogaster GN=CG5190 PE=1 SV=1	1.04	0.92	0.95	0.9	1.08	1.1	1	7	3	52	6.7	0.0609736	0.9525	1.06	1.11286	1.21486
618.1	tr|Q9VRJ4|Q9VRJ4_DROME	CG10672 OS=Drosophila melanogaster GN=CG10672 PE=2 SV=1	1.02	1.01	1.07	0.99	0.96	0.96	0.99	48	8	34	71.4	0.061029	1.0225	0.97	0.948655	1.21446
3417.1	tr|Q8SX64|Q8SX64_DROME	CG12734, isoform B OS=Drosophila melanogaster GN=Girdin PE=2 SV=1	1	0.93	0.98	0.92	1.07	1.12	0.98	4	3	142	1.4	0.0610444	0.9575	1.05667	1.10357	1.21435
3344.1	sp|P00528|SRC64_DROME	Tyrosine-protein kinase Src64B OS=Drosophila melanogaster GN=Src64B PE=1 SV=3	0.95	0.89	0.95	0.99	1.13	1.13	0.96	4	3	63	3.2	0.0610934	0.945	1.07333	1.1358	1.21401
1076.1	sp|Q9VH95|YC17_DROME	Uncharacterized protein CG16817 OS=Drosophila melanogaster GN=CG16817 PE=1 SV=1	0.98	0.9	1.01	0.98	1.07	1.05	1.01	27	3	21	65.1	0.0614508	0.9675	1.04333	1.07838	1.21147
2814.1	tr|Q9W258|Q9W258_DROME	CG3624 OS=Drosophila melanogaster GN=CG3624 PE=2 SV=2	0.9	0.94	1.04	0.97	1.08	1.02	1.06	6	4	20	14.7	0.0620963	0.9625	1.05333	1.09437	1.20693
198.1	tr|Q7JS69|Q7JS69_DROME	FI04632p OS=Drosophila melanogaster GN=nrv3 PE=2 SV=1	0.95	0.93	1.04	0.95	1.06	1.03	1.03	136	5	36	188	0.0622428	0.9675	1.04	1.07494	1.20591
1860.1	tr|Q7KSC4|Q7KSC4_DROME	CG14290 OS=Drosophila melanogaster GN=CG14290 PE=2 SV=1	0.89	0.95	1.02	0.97	1.11	1	1.06	13	1	12	53	0.0622938	0.9575	1.05667	1.10357	1.20556
909.1	tr|E1JJF3|E1JJF3_DROME	Innexin 2, isoform C OS=Drosophila melanogaster GN=inx2 PE=4 SV=1	0.99	0.93	1.02	0.94	1.06	1.04	1.01	32	7	42	37.7	0.0623524	0.97	1.03667	1.06873	1.20515
3517.1	tr|Q9VFI3|Q9VFI3_DROME	CG8066 OS=Drosophila melanogaster GN=CG8066 PE=2 SV=1	1.13	0.99	1.23	0.97	0.95	0.83	0.9	4	1	11	17.6	0.0627054	1.08	0.893333	0.82716	1.2027
372.1	tr|Q961E7|Q961E7_DROME	GH28523p OS=Drosophila melanogaster GN=PhKgamma PE=2 SV=1	0.98	0.92	1	0.98	1.01	1.02	1.09	79	13	48	81.6	0.06298	0.97	1.04	1.07216	1.2008
4697.1	tr|Q9VH55|Q9VH55_DROME	CG9458 OS=Drosophila melanogaster GN=CG9458 PE=2 SV=1	1.01	0.85	0.67	0.86	1.03	1.08	1.5	1	1	31	1.6	0.0630401	0.8475	1.20333	1.41986	1.20038
663.1	sp|Q24547|STX1A_DROME	Syntaxin-1A OS=Drosophila melanogaster GN=Syx1A PE=1 SV=1	0.91	0.94	1.01	0.95	1.01	1.02	1.15	44	10	34	65.4	0.0631009	0.9525	1.06	1.11286	1.19996
1727.1	sp|Q24324|DSOR1_DROME	Dual specificity mitogen-activated protein kinase kinase dSOR1 OS=Drosophila melanogaster GN=Dsor1 PE=2 SV=2	1.04	0.83	1	0.9	1.08	1.08	1.07	14	5	44	16	0.0635165	0.9425	1.07667	1.14235	1.19711
584.1	tr|Q9VTZ5|Q9VTZ5_DROME	LD22449p OS=Drosophila melanogaster GN=Tsf2 PE=2 SV=1	0.98	0.92	1.03	0.94	1.06	1.01	1.06	50	13	92	27.1	0.0635894	0.9675	1.04333	1.07838	1.19662
2872.1	tr|Q9VUW1|Q9VUW1_DROME	CG17026 OS=Drosophila melanogaster GN=CG17026-RA PE=2 SV=1	1	0.82	1.03	0.89	1.15	1.04	1.07	6	3	31	9.6	0.0635894	0.935	1.08667	1.16221	1.19662
1313.1	tr|Q9VEZ3|Q9VEZ3_DROME	LP04448p OS=Drosophila melanogaster GN=msps PE=1 SV=3	0.99	0.95	1.02	0.91	1.05	1.07	1.01	20	14	226	4.4	0.0635894	0.9675	1.04333	1.07838	1.19662
498.1	sp|P47949|TNNC3_DROME	Troponin C, isoform 3 OS=Drosophila melanogaster GN=TpnC73F PE=2 SV=2	1.03	0.9	0.99	0.93	1.08	1.03	1.04	60	6	18	169.6	0.0638844	0.9625	1.05	1.09091	1.19461
2591.1	tr|Q7K581|Q7K581_DROME	CG8963, isoform A OS=Drosophila melanogaster GN=CG8963 PE=2 SV=1	1.05	0.85	0.99	0.89	1.07	1.08	1.07	7	4	63	5.5	0.0640805	0.945	1.07333	1.1358	1.19327
5103.1	tr|Q9VYI2|Q9VYI2_DROME	CG4400 OS=Drosophila melanogaster GN=CG4400 PE=2 SV=2	0.9	0.93	0.96	0.99	1.04	0.99	1.18	1	1	30	1.7	0.064174	0.945	1.07	1.13228	1.19264
1363.1	tr|Q9VVB7|Q9VVB7_DROME	FI02842p OS=Drosophila melanogaster GN=Lmpt PE=2 SV=2	0.96	0.94	0.93	0.92	1.17	1.13	0.94	20	4	39	25.8	0.0642181	0.9375	1.08	1.152	1.19234
469.1	tr|Q7K3N4|Q7K3N4_DROME	CG8888 OS=Drosophila melanogaster GN=CG8888 PE=2 SV=1	0.99	0.91	1.01	0.91	1.12	0.99	1.07	64	12	43	73.6	0.064376	0.955	1.06	1.10995	1.19128
307.2	tr|Q9VF50|Q9VF50_DROME	CG18516 OS=Drosophila melanogaster GN=CG18516 PE=2 SV=1	0.74	0.78	1.04	0.9	1.26	0.93	1.35	6	3	139	2.2	0.0646244	0.865	1.18	1.36416	1.1896
378.1	tr|Q9VXZ8|Q9VXZ8_DROME	BcDNA.GH02901 OS=Drosophila melanogaster GN=CG9009-RA PE=2 SV=2	1	0.88	1.01	0.94	1.09	1.01	1.06	77	19	66	58.8	0.0648031	0.9575	1.05333	1.10009	1.1884
2635.1	tr|Q9VH76|Q9VH76_DROME	Synaptosomal-associated protein OS=Drosophila melanogaster GN=Snap24 PE=2 SV=1	0.87	0.94	1.05	0.92	1.11	1	1.11	7	4	24	14.9	0.0648286	0.945	1.07333	1.1358	1.18823
4160.1	tr|Q9W0E2|Q9W0E2_DROME	CG12091 OS=Drosophila melanogaster GN=CG12091 PE=2 SV=1	1.02	0.98	1.14	1.05	0.99	0.93	0.89	2	2	34	2.9	0.0649364	1.0475	0.936667	0.894193	1.18751
4453.1	tr|Q9VPN2|Q9VPN2_DROME	CG11592 OS=Drosophila melanogaster GN=BEST:CK02467 PE=2 SV=1	0.83	0.99	1.03	0.93	1.04	1.09	1.08	2	1	57	1.8	0.0649626	0.945	1.07	1.13228	1.18734
5178.1	tr|Q9VBF3|Q9VBF3_DROME	CG6503 OS=Drosophila melanogaster GN=CG6503 PE=2 SV=2	0.95	0.81	0.98	0.79	1.39	1.06	1.01	1	1	7	7.6	0.0649673	0.8825	1.15333	1.30689	1.18731
958.7	sp|Q27593|CP6A8_DROME	Cytochrome P450 6a8 OS=Drosophila melanogaster GN=Cyp6a8 PE=2 SV=2	0.89	0.94	0.95	0.94	1.13	0.94	1.22	6	5	58	5.2	0.0654558	0.93	1.09667	1.17921	1.18405
945.1	tr|Q9VTW8|Q9VTW8_DROME	GH27027p OS=Drosophila melanogaster GN=Ncc69 PE=2 SV=1	0.94	1.01	0.98	0.98	1	1.03	1.06	30	15	129	11.6	0.0654941	0.9775	1.03	1.05371	1.1838
2097.1	sp|A2VEI2-2|MICU1_DROME	Isoform A of Calcium uptake protein 1 homolog, mitochondrial OS=Drosophila melanogaster GN=CG4495	0.96	0.93	1.03	0.97	1.05	1.03	1.02	10	7	60	8.3	0.0655243	0.9725	1.03333	1.06255	1.1836
4756.1	tr|Q9VHE3|Q9VHE3_DROME	CG9356, isoform A OS=Drosophila melanogaster GN=CG9356 PE=2 SV=1	0.86	0.99	0.99	0.93	1.16	1.09	0.98	1	1	50	1	0.0655702	0.9425	1.07667	1.14235	1.18329
964.1	tr|Q9VXM4|Q9VXM4_DROME	LD12946p OS=Drosophila melanogaster GN=MSBP PE=2 SV=1	0.97	0.95	1.02	0.95	1.01	1.02	1.09	30	8	28	53.8	0.0656045	0.9725	1.04	1.06941	1.18307
2297.1	sp|Q24114|DALY_DROME	Division abnormally delayed protein OS=Drosophila melanogaster GN=dally PE=1 SV=1	1.01	0.91	0.94	0.95	1.13	1.09	0.97	9	4	69	6.5	0.0659403	0.9525	1.06333	1.11636	1.18085
5392.1	tr|Q9VVF8|Q9VVF8_DROME	CG7692 OS=Drosophila melanogaster GN=CG7692 PE=4 SV=2	0.86	0.94	1.03	0.94	1.13	1.13	0.98	1	1	152	0.3	0.0659867	0.9425	1.08	1.14589	1.18054
4815.1	tr|Q9VQL3|Q9VQL3_DROME	Cornichon related OS=Drosophila melanogaster GN=cnir PE=2 SV=1	1.01	0.96	0.98	0.82	1.12	1.1	1.01	1	1	18	2.7	0.0662555	0.9425	1.07667	1.14235	1.17878
752.1	tr|Q7KUX2|Q7KUX2_DROME	CG4829, isoform B OS=Drosophila melanogaster GN=CG4829 PE=2 SV=1	0.92	0.94	1	1	1.11	1.04	1	39	9	88	22.3	0.0662955	0.965	1.05	1.08808	1.17852
3155.1	tr|Q9VIL2|Q9VIL2_DROME	CG2608 OS=Drosophila melanogaster GN=CG2608 PE=2 SV=1	0.99	0.86	1	0.99	1.06	1.06	1.04	5	2	29	8.6	0.0665956	0.96	1.05333	1.09722	1.17655
3169.1	sp|Q9VDV3|NUPL1_DROME	Probable nucleoporin Nup58 OS=Drosophila melanogaster GN=Nup58 PE=1 SV=1	0.92	0.95	0.98	1	0.98	1.06	1.1	5	2	55	4.5	0.0668369	0.9625	1.04667	1.08745	1.17498
210.1	tr|Q9VKE5|Q9VKE5_DROME	CG14935, isoform B OS=Drosophila melanogaster GN=Mal-B2 PE=1 SV=2	0.94	0.9	1.06	0.87	1.02	1.07	1.13	127	21	67	94.8	0.0669079	0.9425	1.07333	1.13882	1.17452
64.1	tr|Q9VFR2|Q9VFR2_DROME	CG9297, isoform A OS=Drosophila melanogaster GN=CG9297 PE=2 SV=1	0.97	0.91	1.03	0.94	1.09	1.06	1	507	24	104	244.4	0.0671058	0.9625	1.05	1.09091	1.17324
3104.1	sp|Q9VVB4|CCD22_DROME	Coiled-coil domain-containing protein 22 homolog OS=Drosophila melanogaster GN=CG9951 PE=1 SV=1	1.01	0.83	0.78	0.99	0.99	1.12	1.28	5	3	63	4	0.067163	0.9025	1.13	1.25208	1.17287
925.1	tr|Q9VVL5|Q9VVL5_DROME	CG5567 OS=Drosophila melanogaster GN=CG5567-RA PE=2 SV=1	0.99	0.9	1.02	0.93	1	1.07	1.08	31	10	36	42.6	0.0672974	0.96	1.05	1.09375	1.172
2480.1	sp|Q8SXY6|TMEDA_DROME	Transmembrane emp24 domain-containing protein bai OS=Drosophila melanogaster GN=bai PE=2 SV=1	0.9	0.86	1.08	0.9	1.15	1.03	1.08	8	3	24	16.9	0.067342	0.935	1.08667	1.16221	1.17171
184.1	tr|A8JR25|A8JR25_DROME	Fasciclin 1, isoform D OS=Drosophila melanogaster GN=Fas1 PE=4 SV=1	0.98	0.93	1.03	0.95	1.06	1.03	1.02	150	23	74	101.8	0.0678256	0.9725	1.03667	1.06598	1.16861
4556.1	tr|Q9VR64|Q9VR64_DROME	CG17599 OS=Drosophila melanogaster GN=CG17599 PE=1 SV=1	0.72	0.7	1.11	0.81	1.46	0.95	1.26	2	1	58	1.7	0.0678957	0.835	1.22333	1.46507	1.16816
5408.1	tr|Q9VUG6|Q9VUG6_DROME	CG17177 OS=Drosophila melanogaster GN=CG17177 PE=2 SV=2	1	0.97	0.97	0.94	0.98	1.08	1.05	1	1	154	0.3	0.0678997	0.97	1.03667	1.06873	1.16813
2163.2	tr|Q8SX47|Q8SX47_DROME	CG31810 OS=Drosophila melanogaster GN=CG31810 PE=2 SV=1	0.96	0.8	1.04	0.96	1.06	1.08	1.1	6	4	36	8.2	0.0680131	0.94	1.08	1.14894	1.16741
2266.1	tr|Q9VZ34|Q9VZ34_DROME	CG2076 OS=Drosophila melanogaster GN=CG2076 PE=2 SV=1	1.07	0.8	0.91	0.81	1.1	1.01	1.3	9	5	36	12.6	0.0681076	0.8975	1.13667	1.26648	1.1668
4765.1	tr|Q9VJG5|Q9VJG5_DROME	CG31743 OS=Drosophila melanogaster GN=CG4826 PE=2 SV=2	0.84	0.88	1.03	0.84	1.34	1.04	1.02	1	1	38	1.3	0.068244	0.8975	1.13333	1.26277	1.16594
1326.1	tr|Q94883|Q94883_DROME	DNA replication-related element factor OS=Drosophila melanogaster GN=Dref PE=2 SV=2	0.98	0.91	1.03	0.9	1.1	1.07	1	20	10	81	12.4	0.0686901	0.955	1.05667	1.10646	1.16311
1106.1	sp|P27716|INX1_DROME	Innexin inx1 OS=Drosophila melanogaster GN=ogre PE=1 SV=1	0.97	0.9	1.03	0.92	1.01	1.04	1.12	26	6	43	30.6	0.0686901	0.955	1.05667	1.10646	1.16311
4192.1	sp|Q9VHR6|ATG13_DROME	Autophagy-related protein 13 homolog OS=Drosophila melanogaster GN=Atg13 PE=1 SV=1	1	0.87	0.98	1	1.06	1.03	1.06	2	2	57	1.8	0.0687192	0.9625	1.05	1.09091	1.16292
1109.1	sp|Q27415-2|NLP_DROME	Isoform 2 of Nucleoplasmin-like protein OS=Drosophila melanogaster GN=Nlp	0.92	0.91	1.04	0.97	1.07	1.01	1.07	26	6	14	96.1	0.0688225	0.96	1.05	1.09375	1.16227
2921.1	tr|Q7K1R6|Q7K1R6_DROME	CG10916 OS=Drosophila melanogaster GN=CG10916 PE=2 SV=1	1	0.97	0.91	0.95	1.09	1.1	0.97	6	2	29	10.2	0.0688351	0.9575	1.05333	1.10009	1.16219
4039.1	tr|Q9VDF7|Q9VDF7_DROME	CG7079 OS=Drosophila melanogaster GN=CG7079 PE=2 SV=1	0.99	1.04	1	1.08	0.99	0.95	0.96	2	2	30	3.3	0.0688606	1.0275	0.966667	0.940795	1.16203
5377.1	sp|P20028|RPA2_DROME	DNA-directed RNA polymerase I subunit RPA2 OS=Drosophila melanogaster GN=RpI135 PE=2 SV=2	0.95	0.82	0.93	0.75	1.48	1.04	1.02	1	1	128	0.4	0.068876	0.8625	1.18	1.36812	1.16193
3009.1	sp|Q9VN27|LIPT2_DROME	Putative lipoyltransferase 2, mitochondrial OS=Drosophila melanogaster GN=CG9804 PE=2 SV=1	1.06	1.02	1.15	0.97	0.97	0.95	0.88	5	4	26	9.6	0.0689209	1.05	0.933333	0.888889	1.16165
5518.1	sp|Q9VHA0|SCM_DROME	Polycomb protein Scm OS=Drosophila melanogaster GN=Scm PE=1 SV=2	1.09	0.98	1.16	1	0.96	0.85	0.96	1	1	93	0.5	0.0689999	1.0575	0.923333	0.873128	1.16115
5286.1	tr|Q9VSH0|Q9VSH0_DROME	CG7194 OS=Drosophila melanogaster GN=CG7194 PE=2 SV=1	0.88	0.81	1.09	0.94	1.06	1.11	1.12	1	1	40	1.2	0.0690117	0.93	1.09667	1.17921	1.16108
3160.1	tr|Q7JZW7|Q7JZW7_DROME	RE08073p OS=Drosophila melanogaster GN=Tsp42Eo PE=2 SV=1	0.9	0.95	1.01	0.94	1	1.03	1.16	5	2	24	10.2	0.0690733	0.95	1.06333	1.1193	1.16069
1249.1	tr|Q9VNL6|Q9VNL6_DROME	CG1077 OS=Drosophila melanogaster GN=CG1077-RA PE=2 SV=1	0.95	0.89	1.02	0.9	1.01	1.03	1.19	22	6	80	13.7	0.0691203	0.94	1.07667	1.14539	1.16039
3145.1	tr|Q9VCR0|Q9VCR0_DROME	CG17109 OS=Drosophila melanogaster GN=CG17109 PE=1 SV=1	1.06	0.81	0.98	0.82	1.15	1.18	1.01	5	2	45	5.6	0.0691306	0.9175	1.11333	1.21344	1.16033
5364.1	sp|Q95R48|OCTL_DROME	Organic cation transporter-like protein OS=Drosophila melanogaster GN=Orct2 PE=1 SV=2	0.8	0.76	1.04	0.95	1.25	0.95	1.25	1	1	63	0.8	0.0692573	0.8875	1.15	1.29577	1.15953
1565.1	tr|Q9V3N1|Q9V3N1_DROME	LD24467p OS=Drosophila melanogaster GN=Spn27A PE=2 SV=1	1.01	0.87	1	0.96	1.04	1.03	1.1	16	7	50	16.1	0.0692816	0.96	1.05667	1.10069	1.15938
2085.1	tr|Q5U156|Q5U156_DROME	RE01954p OS=Drosophila melanogaster GN=row PE=2 SV=1	0.92	0.94	1.07	0.85	1.1	1.07	1.05	10	8	144	3.5	0.0693262	0.945	1.07333	1.1358	1.1591
4743.1	tr|Q8MSW4|Q8MSW4_DROME	CG9666, isoform A OS=Drosophila melanogaster GN=CG9666 PE=2 SV=1	1.2	0.96	1.08	1.04	0.98	0.92	0.82	1	1	24	2.1	0.0694028	1.07	0.906667	0.847352	1.15862
1180.1	tr|Q9VTR6|Q9VTR6_DROME	Pericardin OS=Drosophila melanogaster GN=prc PE=2 SV=2	0.97	0.99	0.94	0.91	1.16	1.01	1.01	24	5	163	7.3	0.0695067	0.9525	1.06	1.11286	1.15797
1387.1	sp|Q24478|CP190_DROME	Centrosome-associated zinc finger protein CP190 OS=Drosophila melanogaster GN=Cp190 PE=1 SV=2	0.98	0.92	1.03	0.92	1.11	1.02	1.03	19	9	122	7.8	0.0695702	0.9625	1.05333	1.09437	1.15758
2956.1	sp|O01939|MST_DROME	Protein misato OS=Drosophila melanogaster GN=mst PE=2 SV=1	1.03	0.91	0.99	0.92	1.1	1.02	1.04	5	5	65	3.9	0.0695702	0.9625	1.05333	1.09437	1.15758
2630.1	tr|Q9V9U7|Q9V9U7_DROME	CG1890 OS=Drosophila melanogaster GN=CG1890 PE=2 SV=1	0.82	0.94	1.03	0.94	1.08	1	1.18	7	4	13	27.1	0.0698537	0.9325	1.08667	1.16533	1.15581
289.1	tr|Q9VD29|Q9VD29_DROME	RE74312p OS=Drosophila melanogaster GN=sar1 PE=2 SV=1	0.97	0.95	1.03	0.96	1.05	1.02	1.02	97	8	22	222.5	0.0699749	0.9775	1.03	1.05371	1.15506
3690.1	sp|P30189|TOP1_DROME	DNA topoisomerase 1 OS=Drosophila melanogaster GN=Top1 PE=1 SV=1	0.96	0.77	1.02	0.94	1.2	1.02	1.08	3	3	112	1.3	0.0702143	0.9225	1.1	1.19241	1.15357
3320.1	tr|A1Z945|A1Z945_DROME	CG8771 OS=Drosophila melanogaster GN=CG8771 PE=4 SV=1	1.07	0.82	0.94	0.93	1.12	1.06	1.07	4	3	208	1	0.0703092	0.94	1.08333	1.15248	1.15299
1726.1	sp|Q24247|ITA1_DROME	Integrin alpha-PS1 OS=Drosophila melanogaster GN=mew PE=1 SV=2	1.02	0.89	1	0.94	1.06	1.06	1.02	14	6	128	5.5	0.0703255	0.9625	1.04667	1.08745	1.15289
3607.1	tr|A1ZB73|A1ZB73_DROME	Glutathione S transferase E8 OS=Drosophila melanogaster GN=GstE8 PE=3 SV=1	0.89	0.85	1.06	0.77	1.21	0.95	1.27	3	3	25	6	0.0705549	0.8925	1.14333	1.28105	1.15147
4424.1	sp|Q9VLM5|DAD1_DROME	Dolichyl-diphosphooligosaccharide--protein glycosyltransferase subunit DAD1 OS=Drosophila melanogaster GN=CG13393 PE=3 SV=1	0.95	0.94	1.03	0.97	1.01	1.07	1.03	2	1	13	8	0.0708278	0.9725	1.03667	1.06598	1.1498
621.1	tr|Q9VBU7|Q9VBU7_DROME	Nup358 OS=Drosophila melanogaster GN=Nup358 PE=2 SV=2	0.96	0.94	1.03	0.96	1.05	1.06	1	47	32	296	7.9	0.0708278	0.9725	1.03667	1.06598	1.1498
3258.1	sp|Q9VYQ7|CP311_DROME	Probable cytochrome P450 311a1 OS=Drosophila melanogaster GN=Cyp311a1 PE=2 SV=1	1.05	0.88	0.99	0.76	1.1	1.05	1.16	4	4	55	3.6	0.0708879	0.92	1.10333	1.19928	1.14943
125.1	tr|A8JV00|A8JV00_DROME	CG34417, isoform H OS=Drosophila melanogaster GN=CG34417 PE=4 SV=1	0.96	0.9	1.04	0.95	1.1	1.02	1.04	218	86	557	19.6	0.071069	0.9625	1.05333	1.09437	1.14832
364.1	tr|D1YSG8|D1YSG8_DROME	Calcium/calmodulin-dependent protein kinase II, isoform J OS=Drosophila melanogaster GN=CaMKII PE=4 SV=1	0.98	0.91	1.03	0.93	1.03	1.02	1.11	81	11	60	67.5	0.071069	0.9625	1.05333	1.09437	1.14832
4832.1	tr|Q0E8T7|Q0E8T7_DROME	CG34124 OS=Drosophila melanogaster GN=CG34124 PE=4 SV=1	0.77	0.93	0.96	0.96	0.97	1.11	1.31	1	1	232	0.2	0.0713261	0.905	1.13	1.24862	1.14675
4450.1	tr|A1A753|A1A753_DROME	CG42246 OS=Drosophila melanogaster GN=CG42246 PE=4 SV=1	0.84	0.71	1.14	0.76	0.99	1.29	1.26	2	1	10	9.8	0.0713293	0.8625	1.18	1.36812	1.14673
3462.1	sp|Q9VIV3|CTU2_DROME	Cytoplasmic tRNA 2-thiolation protein 2 OS=Drosophila melanogaster GN=CG10189 PE=1 SV=1	0.97	0.95	1	0.94	1.02	1.13	1	4	2	45	4.5	0.0714267	0.965	1.05	1.08808	1.14614
3834.1	tr|Q9VK03|Q9VK03_DROME	CG15639, isoform A OS=Drosophila melanogaster GN=CG15639 PE=2 SV=1	0.84	0.91	1.03	0.89	1.23	0.95	1.15	3	2	57	2.6	0.0714955	0.9175	1.11	1.20981	1.14572
972.1	tr|Q7JWQ7|Q7JWQ7_DROME	CG3074, isoform A OS=Drosophila melanogaster GN=CG3074 PE=2 SV=1	1.02	0.84	1.02	0.9	1.09	1.03	1.1	30	5	49	30.8	0.0715789	0.945	1.07333	1.1358	1.14521
1052.1	tr|A4UZL2|A4UZL2_DROME	CG15609, isoform B OS=Drosophila melanogaster GN=CG15609 PE=4 SV=1	0.99	0.9	1.04	0.92	1.04	1.05	1.06	27	15	111	12.1	0.0719495	0.9625	1.05	1.09091	1.14297
1797.1	tr|Q9VKB2|Q9VKB2_DROME	Ced-12 OS=Drosophila melanogaster GN=Ced-12 PE=2 SV=1	1.01	0.87	1	0.93	1.13	1.05	1.01	13	7	83	7.8	0.0719764	0.9525	1.06333	1.11636	1.14281
3811.1	tr|Q9V3F8|Q9V3F8_DROME	Pyrroline-5-carboxylate reductase OS=Drosophila melanogaster GN=P5cr PE=2 SV=1	1.19	1.02	1.5	0.91	0.85	0.68	0.85	3	2	30	5.1	0.0725272	1.155	0.793333	0.686869	1.1395
826.1	sp|Q9VH39|NDUF4_DROME	Protein NDUFAF4 homolog OS=Drosophila melanogaster GN=CG11722 PE=1 SV=1	0.94	0.94	1.02	0.93	1.04	0.99	1.13	35	9	24	73.9	0.0728753	0.9575	1.05333	1.10009	1.13742
3011.1	tr|A1Z6N4|A1Z6N4_DROME	MIP05841p OS=Drosophila melanogaster GN=Tdc2 PE=2 SV=1	0.97	0.93	1.05	0.91	1.07	1.04	1.04	5	4	72	3.5	0.0731394	0.965	1.05	1.08808	1.13585
4963.1	sp|Q9W4K2|Y3556_DROME	Uncharacterized protein CG3556 OS=Drosophila melanogaster GN=CG3556 PE=2 SV=1	0.94	0.98	0.92	0.98	1.16	1.03	0.99	1	1	65	0.8	0.0733414	0.955	1.06	1.10995	1.13465
24.1	sp|Q9W401|CISY_DROME	Probable citrate synthase, mitochondrial OS=Drosophila melanogaster GN=kdn PE=2 SV=1	0.99	0.93	1.01	0.99	1.04	1.04	1.01	1086	18	52	1053.5	0.0734649	0.98	1.03	1.05102	1.13392
1705.1	tr|Q9W0H3|Q9W0H3_DROME	CG9186, isoform A OS=Drosophila melanogaster GN=CG9186 PE=2 SV=1	0.9	0.9	1.04	0.98	1.07	1.01	1.09	14	7	36	19.6	0.0734768	0.955	1.05667	1.10646	1.13385
4581.1	tr|B7Z0T0|B7Z0T0_DROME	Melanization protease 1, isoform C OS=Drosophila melanogaster GN=MP1 PE=3 SV=1	0.87	1.02	0.96	0.95	1.15	1.07	0.99	2	1	45	2.2	0.0734992	0.95	1.07	1.12632	1.13372
2586.1	tr|Q9VJD1|Q9VJD1_DROME	CG6453 OS=Drosophila melanogaster GN=CG6453 PE=2 SV=1	0.87	0.93	1.06	0.9	1.04	1.03	1.16	7	4	62	5.7	0.0737564	0.94	1.07667	1.14539	1.1322
561.1	tr|A8Y516|A8Y516_DROME	Unextended, isoform E OS=Drosophila melanogaster GN=uex PE=4 SV=2	1.01	0.91	1.01	0.96	1.04	1.04	1.03	52	17	93	27.9	0.0738331	0.9725	1.03667	1.06598	1.13175
362.1	sp|P29746|BNB_DROME	Protein bangles and beads OS=Drosophila melanogaster GN=bnb PE=1 SV=1	0.97	0.93	1.02	0.97	1.08	1.02	1.01	81	18	46	88.5	0.0738331	0.9725	1.03667	1.06598	1.13175
2371.1	tr|Q6NL44|Q6NL44_DROME	CG33722, isoform B OS=Drosophila melanogaster GN=CG18749 PE=2 SV=1	1	0.95	1.01	0.94	1.06	1.01	1.02	8	6	54	7.5	0.0738331	0.975	1.03	1.05641	1.13175
4379.1	sp|Q8INQ7|KTAP2_DROME	Protein KRTCAP2 homolog OS=Drosophila melanogaster GN=CG31460 PE=2 SV=1	1.29	1.04	1.11	0.92	0.85	0.92	0.87	2	1	15	6.5	0.0739027	1.09	0.88	0.807339	1.13134
1734.1	tr|Q9VAC4|Q9VAC4_DROME	CG7911 OS=Drosophila melanogaster GN=CG7911 PE=1 SV=1	1	0.98	0.9	0.93	1.16	1	1.03	14	4	17	40.3	0.0739913	0.9525	1.06333	1.11636	1.13082
4010.1	tr|Q9VE94|Q9VE94_DROME	CG18600 OS=Drosophila melanogaster GN=CG18600 PE=2 SV=1	1.15	0.96	1.02	1.08	0.95	0.97	0.86	2	2	44	2.3	0.074014	1.0525	0.926667	0.880443	1.13069
1981.1	tr|Q9W002|Q9W002_DROME	Misshapen, isoform A OS=Drosophila melanogaster GN=msn PE=4 SV=3	0.96	0.91	1.03	0.97	1.08	1.04	1.01	11	8	162	3.4	0.0743312	0.9675	1.04333	1.07838	1.12883
350.1	sp|P41044|CAB32_DROME	Calbindin-32 OS=Drosophila melanogaster GN=Cbp53E PE=2 SV=1	0.95	0.95	1.02	0.98	1.03	1.07	1	84	11	36	117.7	0.0743742	0.975	1.03333	1.05983	1.12858
2748.1	tr|Q9VVM8|Q9VVM8_DROME	CG5290 OS=Drosophila melanogaster GN=CG5290-RA PE=2 SV=1	1.02	0.86	1	0.94	1.1	1.02	1.06	6	5	92	3.3	0.074464	0.955	1.06	1.10995	1.12805
2367.1	sp|Q01637|UMPS_DROME	Uridine 5'-monophosphate synthase OS=Drosophila melanogaster GN=r-l PE=2 SV=2	0.95	1.02	0.94	1	1.03	1.02	1.04	8	6	53	7.5	0.074464	0.9775	1.03	1.05371	1.12805
2151.1	tr|O18645|O18645_DROME	EG:132E8.2 protein OS=Drosophila melanogaster GN=SNF1A PE=2 SV=1	1.02	0.98	1.06	1.03	0.96	0.95	1	10	5	65	7.7	0.074464	1.0225	0.97	0.948655	1.12805
3889.1	tr|Q7KS65|Q7KS65_DROME	CG42390, isoform C OS=Drosophila melanogaster GN=CG42390 PE=2 SV=1	0.95	0.85	1.07	0.91	1.11	1.06	1.05	3	2	80	1.9	0.0745847	0.945	1.07333	1.1358	1.12735
757.1	tr|Q8INW9|Q8INW9_DROME	Fondue, isoform A OS=Drosophila melanogaster GN=fon PE=2 SV=1	1.03	0.85	1.02	0.88	1.11	1.06	1.05	39	6	57	34.5	0.0753363	0.945	1.07333	1.1358	1.123
2789.1	tr|Q8IMT3|Q8IMT3_DROME	CG31436 OS=Drosophila melanogaster GN=CG31436 PE=2 SV=1	1.06	1	1.05	0.98	0.95	0.96	0.99	6	4	50	6	0.0755395	1.0225	0.966667	0.945395	1.12183
3862.1	tr|Q9W4P0|Q9W4P0_DROME	CG2938 OS=Drosophila melanogaster GN=CG2938 PE=2 SV=1	1.17	1.09	1.05	0.95	1	0.82	0.91	3	2	98	1.5	0.0758812	1.065	0.91	0.85446	1.11987
3514.1	tr|Q9VGA3|Q9VGA3_DROME	CG4115 OS=Drosophila melanogaster GN=CG4115 PE=2 SV=2	0.92	1.2	1.02	1.18	0.87	0.95	0.87	4	1	25	7.9	0.0760428	1.08	0.896667	0.830247	1.11894
5482.1	tr|Q9W378|Q9W378_DROME	FI01101p OS=Drosophila melanogaster GN=mei-P26 PE=2 SV=1	0.71	0.89	0.91	1.07	1.17	0.99	1.25	1	1	129	0.4	0.0760612	0.895	1.13667	1.27002	1.11884
1577.1	tr|Q9VHE4|Q9VHE4_DROME	CG8132 OS=Drosophila melanogaster GN=CG8132 PE=2 SV=1	1.02	1	1.09	0.99	0.98	0.96	0.95	16	5	32	25.1	0.0763619	1.025	0.963333	0.939837	1.11712
5761.1	sp|Q24595-3|XPC_DROME	Isoform 3 of DNA repair protein complementing XP-C cells homolog OS=Drosophila melanogaster GN=mus210	0.87	0.89	0.89	0.99	1.2	1.25	0.91	1	1	144	0.3	0.0764289	0.91	1.12	1.23077	1.11674
1956.1	tr|A1Z9M2|A1Z9M2_DROME	CG8331 OS=Drosophila melanogaster GN=CG8331 PE=4 SV=1	0.83	0.92	1.07	0.92	1.15	1.01	1.1	12	2	20	29.6	0.0764837	0.935	1.08667	1.16221	1.11643
1286.1	tr|Q9VSN9|Q9VSN9_DROME	GM04779p OS=Drosophila melanogaster GN=SrpRbeta PE=2 SV=2	0.88	0.95	1.03	0.98	1.06	1.09	1.01	21	7	27	38.8	0.0765342	0.96	1.05333	1.09722	1.11614
4599.1	tr|Q9VYE7|Q9VYE7_DROME	Inositol 1,4,5-triphosphate kinase 2, isoform C OS=Drosophila melanogaster GN=IP3K2 PE=2 SV=2	0.98	0.85	0.98	0.99	0.99	1.12	1.08	2	1	51	1.9	0.07678	0.95	1.06333	1.1193	1.11475
1405.1	tr|Q9VS44|Q9VS44_DROME	CG8607 OS=Drosophila melanogaster GN=CG8607 PE=2 SV=2	1.01	0.9	0.99	0.95	1	1.11	1.04	19	6	31	31.1	0.0767994	0.9625	1.05	1.09091	1.11464
2018.1	tr|Q0E9D9|Q0E9D9_DROME	CG2269, isoform A OS=Drosophila melanogaster GN=CG2269 PE=2 SV=1	1	0.93	1.01	0.92	1.04	1.1	1	11	6	79	6.9	0.0768242	0.965	1.04667	1.08463	1.1145
389.1	sp|P33438|GLT_DROME	Glutactin OS=Drosophila melanogaster GN=Glt PE=1 SV=2	0.98	0.98	1.02	0.91	1.06	1.03	1.02	75	24	119	31.6	0.0768395	0.9725	1.03667	1.06598	1.11442
4395.1	tr|Q9VY10|Q9VY10_DROME	CG9521 OS=Drosophila melanogaster GN=CG9521 PE=2 SV=1	0.92	0.86	1.06	0.95	1.12	1.07	1.02	2	1	70	1.4	0.0770304	0.9475	1.07	1.12929	1.11334
3380.1	tr|Q9VEV1|Q9VEV1_DROME	LD10376p OS=Drosophila melanogaster GN=Pak3 PE=2 SV=1	1.04	0.85	1	0.88	1.13	1.08	1.02	4	3	64	3.1	0.0772487	0.9425	1.07667	1.14235	1.11211
5451.1	tr|Q9VAB8|Q9VAB8_DROME	CG7928 OS=Drosophila melanogaster GN=CG7928 PE=2 SV=1	0.76	1	0.94	0.96	1.07	1.01	1.27	1	1	53	0.9	0.0774855	0.915	1.11667	1.2204	1.11078
2241.1	sp|Q9VW60|ADCY2_DROME	Adenylate cyclase type 2 OS=Drosophila melanogaster GN=Ac76E PE=2 SV=3	0.96	0.85	0.99	0.99	1.17	1.04	1.01	9	6	143	3.1	0.0779227	0.9475	1.07333	1.13281	1.10834
1352.1	tr|Q7K1S1|Q7K1S1_DROME	CG8067 OS=Drosophila melanogaster GN=CG8067 PE=2 SV=1	1	0.94	1.02	0.94	1.03	1.04	1.02	20	6	37	26.9	0.077925	0.975	1.03	1.05641	1.10832
118.1	sp|P29310|1433Z_DROME	14-3-3 protein zeta OS=Drosophila melanogaster GN=14-3-3zeta PE=1 SV=1	0.93	0.96	1.02	0.99	1.01	1.05	1.03	228	10	28	404.1	0.077925	0.975	1.03	1.05641	1.10832
2734.2	tr|Q95RR5|Q95RR5_DROME	LD15217p OS=Drosophila melanogaster GN=Pi3K68D PE=2 SV=1	1.02	0.71	1.04	0.85	1.04	1.13	1.22	2	2	40	2.5	0.0779271	0.905	1.13	1.24862	1.10831
2440.1	tr|Q8IMT4|Q8IMT4_DROME	CG31288 OS=Drosophila melanogaster GN=CG31288 PE=2 SV=1	1.05	0.79	1.01	0.86	1.12	1.13	1.04	8	4	50	8	0.0779297	0.9275	1.09667	1.18239	1.1083
1040.1	tr|Q9VCS2|Q9VCS2_DROME	CG13833 OS=Drosophila melanogaster GN=CG13833 PE=2 SV=1	0.99	0.87	1.01	0.97	1.02	1.09	1.04	28	6	35	39.7	0.0779882	0.96	1.05	1.09375	1.10797
2631.1	sp|Q9V8K2|EXOC3_DROME	Exocyst complex component 3 OS=Drosophila melanogaster GN=sec6 PE=1 SV=2	1.06	0.91	0.9	0.93	1.13	1.01	1.06	7	4	87	4	0.0780119	0.95	1.06667	1.12281	1.10784
4619.1	sp|Q9VM46|SEM1_DROME	Probable 26S proteasome complex subunit sem1 OS=Drosophila melanogaster GN=CG13779 PE=1 SV=1	1.01	0.88	0.92	0.94	0.95	1.18	1.12	1	1	9	5.3	0.0781574	0.9375	1.08333	1.15556	1.10703
967.1	tr|Q9VL01|Q9VL01_DROME	CG5390 OS=Drosophila melanogaster GN=CG5390-RA PE=2 SV=1	0.92	0.95	1.05	0.92	1.05	1.01	1.12	30	7	45	33.5	0.078416	0.96	1.06	1.10417	1.1056
1392.1	tr|A8DY80|A8DY80_DROME	Not1, isoform D OS=Drosophila melanogaster GN=Not1 PE=4 SV=1	1	0.94	1.01	0.93	1.07	1.01	1.02	19	9	281	3.4	0.0785257	0.97	1.03333	1.06529	1.10499
3205.1	sp|Q9VH38|TFB2M_DROME	Dimethyladenosine transferase 2, mitochondrial OS=Drosophila melanogaster GN=mtTFB2 PE=2 SV=2	0.96	0.94	1.04	0.9	1.11	1.06	1	4	4	52	3.8	0.0785514	0.96	1.05667	1.10069	1.10485
2195.1	tr|Q7JV39|Q7JV39_DROME	CG11400 OS=Drosophila melanogaster GN=CG11400 PE=2 SV=1	0.98	0.88	1.06	0.88	1.04	1.07	1.09	10	2	22	22.8	0.0789211	0.95	1.06667	1.12281	1.10281
17.1	sp|P18091-3|ACTN_DROME	Isoform Larval muscle of Alpha-actinin, sarcomeric OS=Drosophila melanogaster GN=Actn	0.99	0.93	1.02	0.97	1.05	1.02	1.02	1467	54	106	690	0.0789548	0.9775	1.03	1.05371	1.10262
5744.1	tr|Q9VY07|Q9VY07_DROME	CG9517, isoform A OS=Drosophila melanogaster GN=CG9517 PE=2 SV=3	0.92	0.89	0.99	1.01	1.04	1.15	1	1	1	95	0.5	0.0790294	0.9525	1.06333	1.11636	1.10221
1354.1	tr|Q7K148|Q7K148_DROME	Proteasome subunit beta type OS=Drosophila melanogaster GN=Prosbeta5 PE=2 SV=1	0.95	0.91	1.03	0.96	1.1	1.04	1	20	6	31	32.1	0.0790604	0.9625	1.04667	1.08745	1.10204
92.1	sp|P29613|TPIS_DROME	Triosephosphate isomerase OS=Drosophila melanogaster GN=Tpi PE=1 SV=3	0.96	0.92	1.02	0.99	1.05	1.07	1	315	10	27	591.9	0.0791765	0.9725	1.04	1.06941	1.1014
4495.1	tr|Q9VVC0|Q9VVC0_DROME	CG13023 OS=Drosophila melanogaster GN=CG13023 PE=1 SV=1	1.11	1.11	1.05	1.35	1	0.93	0.45	2	1	45	2.2	0.0794348	1.155	0.793333	0.686869	1.09999
754.1	sp|P54192|PBP2_DROME	Pheromone-binding protein-related protein 2 OS=Drosophila melanogaster GN=Pbprp2 PE=2 SV=2	0.99	0.88	1.02	0.91	1.1	0.98	1.13	39	7	17	116.3	0.0795159	0.95	1.07	1.12632	1.09955
1086.1	tr|Q0KHQ2|Q0KHQ2_DROME	CG34120, isoform C OS=Drosophila melanogaster GN=CG34120 PE=4 SV=1	0.98	0.94	1	0.98	1.07	1.06	0.98	26	13	224	5.8	0.0796163	0.975	1.03667	1.06325	1.099
630.1	sp|Q7KML2|ACOX1_DROME	Probable peroxisomal acyl-coenzyme A oxidase 1 OS=Drosophila melanogaster GN=CG5009 PE=1 SV=1	1.01	0.94	1.01	0.88	1.08	1	1.09	46	20	74	31	0.0798755	0.96	1.05667	1.10069	1.09759
3869.1	sp|Q6NN40|NTM1_DROME	Alpha N-terminal protein methyltransferase 1 OS=Drosophila melanogaster GN=CG1675 PE=1 SV=1	0.94	0.93	1.01	0.97	1.13	1	1.02	3	2	31	4.9	0.0800321	0.9625	1.05	1.09091	1.09674
1819.1	tr|Q9VS39|Q9VS39_DROME	CG14830 OS=Drosophila melanogaster GN=CG14830 PE=1 SV=1	0.87	0.98	1.03	0.97	1.06	1.05	1.04	13	5	36	17.9	0.0800321	0.9625	1.05	1.09091	1.09674
5135.1	tr|Q9VP62|Q9VP62_DROME	CG9389 OS=Drosophila melanogaster GN=CG9389 PE=2 SV=1	0.9	0.78	0.98	0.85	0.94	1.12	1.44	1	1	65	0.8	0.0801733	0.8775	1.16667	1.32953	1.09597
4855.1	tr|Q9VQA3|Q9VQA3_DROME	CG17242 OS=Drosophila melanogaster GN=CG17242 PE=2 SV=1	0.86	0.81	0.82	1.01	0.96	1.44	1.09	1	1	26	1.9	0.0803858	0.875	1.16333	1.32952	1.09482
2711.1	tr|Q9VBU6|Q9VBU6_DROME	CG11857, isoform A OS=Drosophila melanogaster GN=CG11857 PE=2 SV=1	1.04	0.81	0.87	1	1.17	1.1	1.01	7	2	24	14.8	0.0805349	0.93	1.09333	1.17563	1.09402
3458.1	tr|Q9VS54|Q9VS54_DROME	Quemao, isoform A OS=Drosophila melanogaster GN=qm PE=2 SV=1	0.97	0.98	1.02	0.83	1.03	1.06	1.1	4	2	39	5.2	0.0806336	0.95	1.06333	1.1193	1.09348
543.1	tr|Q9XYZ9|Q9XYZ9_DROME	CG16936 OS=Drosophila melanogaster GN=CG16936 PE=2 SV=1	0.94	0.97	0.99	0.98	0.97	1.08	1.07	55	5	25	109.3	0.080638	0.97	1.04	1.07216	1.09346
1305.1	sp|P36975|SNP25_DROME	Synaptosomal-associated protein 25 OS=Drosophila melanogaster GN=Snap25 PE=2 SV=1	1.05	0.89	0.94	0.95	1.09	1.09	1	21	4	24	44.4	0.080677	0.9575	1.06	1.10705	1.09325
2232.1	tr|Q9VF03|Q9VF03_DROME	Brahma associated protein 155 kDa OS=Drosophila melanogaster GN=mor PE=2 SV=3	1	0.9	1	0.98	1.07	1.06	1	9	6	131	3.4	0.0807371	0.97	1.04333	1.0756	1.09293
1525.1	tr|A1Z9U2|A1Z9U2_DROME	CG12858 OS=Drosophila melanogaster GN=CG12858 PE=4 SV=1	0.92	0.95	1.02	0.98	1.02	1.1	1.01	17	5	83	10.2	0.0807873	0.9675	1.04333	1.07838	1.09266
774.1	tr|Q8T0Q4|Q8T0Q4_DROME	GH13992p OS=Drosophila melanogaster GN=shrb PE=2 SV=1	0.95	0.93	1.06	0.9	1.08	1.04	1.04	38	10	25	74.7	0.0807957	0.96	1.05333	1.09722	1.09261
4825.1	tr|Q9VPB8|Q9VPB8_DROME	CG4289 OS=Drosophila melanogaster GN=CG4289 PE=2 SV=1	1.04	0.86	1	0.89	1.09	1.03	1.07	1	1	31	1.6	0.0808462	0.9475	1.06333	1.12225	1.09234
4979.1	tr|Q9VCF4|Q9VCF4_DROME	AP-1sigma OS=Drosophila melanogaster GN=AP-1sigma PE=2 SV=2	0.91	1	0.96	0.97	1.03	1.13	0.99	1	1	19	2.7	0.0810431	0.96	1.05	1.09375	1.09128
5160.1	sp|O76767|ERD2_DROME	ER lumen protein retaining receptor OS=Drosophila melanogaster GN=KdelR PE=2 SV=1	0.93	1.07	0.7	0.94	1.19	1.06	1.11	1	1	24	2	0.0811989	0.91	1.12	1.23077	1.09045
129.1	tr|Q9VSM0|Q9VSM0_DROME	CG32352, isoform B OS=Drosophila melanogaster GN=CG32352 PE=1 SV=2	0.95	0.94	1.02	0.99	1.07	1.02	1.01	214	49	192	55.7	0.0816475	0.975	1.03333	1.05983	1.08806
3213.1	tr|Q9VZF8|Q9VZF8_DROME	CG1332 OS=Drosophila melanogaster GN=CG1332 PE=1 SV=2	0.9	0.93	1.03	0.96	1.1	1.08	0.98	4	4	99	2	0.0819241	0.955	1.05333	1.10297	1.08659
971.1	tr|Q8IR38|Q8IR38_DROME	HDAC6, isoform B OS=Drosophila melanogaster GN=HDAC6 PE=2 SV=1	0.98	0.95	1	0.97	1.02	1.08	0.99	30	6	126	11.9	0.0820145	0.975	1.03	1.05641	1.08611
2347.1	sp|Q9VEZ5|IKKB_DROME	Inhibitor of nuclear factor kappa-B kinase subunit beta OS=Drosophila melanogaster GN=ird5 PE=1 SV=2	1.03	0.94	0.98	0.95	1.02	1.05	1.02	8	8	86	4.6	0.0820145	0.975	1.03	1.05641	1.08611
2039.1	sp|Q9VGH7|CLCN2_DROME	Chloride channel protein 2 OS=Drosophila melanogaster GN=ClC-a PE=2 SV=3	0.98	0.87	1.03	0.93	0.99	1.11	1.09	11	5	134	4.1	0.0820501	0.9525	1.06333	1.11636	1.08592
730.1	tr|Q9VH09|Q9VH09_DROME	CG3999 OS=Drosophila melanogaster GN=CG3999 PE=2 SV=1	0.97	0.83	1.09	0.85	1.1	1.09	1.08	40	14	110	18.2	0.0820613	0.935	1.09	1.16578	1.08586
3327.1	tr|Q9W124|Q9W124_DROME	CG4806 OS=Drosophila melanogaster GN=CG33228 PE=2 SV=2	0.97	0.9	1	0.99	1.05	1.09	0.99	4	3	75	2.7	0.0821163	0.965	1.04333	1.08117	1.08557
1696.1	sp|Q9VBV5|SIL1_DROME	Nucleotide exchange factor SIL1 OS=Drosophila melanogaster GN=CG10420 PE=2 SV=1	0.98	0.89	1.04	0.93	1.09	1.06	1.01	14	8	48	14.6	0.0822152	0.96	1.05333	1.09722	1.08505
4787.1	sp|Q86B79|UNK_DROME	RING finger protein unkempt OS=Drosophila melanogaster GN=unk PE=1 SV=1	1.05	0.94	0.81	0.91	0.98	1.18	1.12	1	1	68	0.7	0.0827795	0.9275	1.09333	1.1788	1.08208
1411.1	tr|Q53XD2|Q53XD2_DROME	Crk, isoform C OS=Drosophila melanogaster GN=Crk PE=2 SV=1	1.02	0.92	1.01	0.94	1.04	1.04	1.03	19	6	31	30.5	0.0828484	0.9725	1.03667	1.06598	1.08172
548.1	sp|Q9VN14|CONT_DROME	Contactin OS=Drosophila melanogaster GN=Cont PE=1 SV=2	1.01	0.94	1.01	0.93	1.07	1.01	1.03	53	23	158	16.8	0.0828484	0.9725	1.03667	1.06598	1.08172
3060.1	tr|O44434|O44434_DROME	QKR58E-3 OS=Drosophila melanogaster GN=qkr58E-3 PE=2 SV=1	1.05	0.95	0.95	0.75	1.16	1.03	1.11	5	3	37	6.8	0.0828584	0.925	1.1	1.18919	1.08166
3985.1	tr|Q7KSI9|Q7KSI9_DROME	CG42542, isoform B OS=Drosophila melanogaster GN=CG4196 PE=2 SV=1	0.94	0.94	1.01	1.01	1	1.05	1.06	3	1	35	4.2	0.0828681	0.975	1.03667	1.06325	1.08161
3389.1	sp|P35500-3|SCNA_DROME	Isoform exonb of Sodium channel protein para OS=Drosophila melanogaster GN=para	1.02	0.98	0.91	0.99	1.05	1.04	1.02	4	3	238	0.8	0.0828681	0.975	1.03667	1.06325	1.08161
1524.1	tr|Q7K5J8|Q7K5J8_DROME	Cuticular protein 57A, isoform A OS=Drosophila melanogaster GN=Cpr57A PE=2 SV=1	0.93	0.89	1.07	0.93	1.08	1.02	1.09	17	5	20	42.9	0.0832165	0.955	1.06333	1.11344	1.07979
1013.1	tr|Q9VRW2|Q9VRW2_DROME	CG10226 OS=Drosophila melanogaster GN=CG10226 PE=2 SV=1	0.95	0.93	1.06	0.91	1.07	1.04	1.04	28	17	146	9.6	0.0832619	0.9625	1.05	1.09091	1.07955
2174.1	tr|Q9VVP9|Q9VVP9_DROME	CG4306 OS=Drosophila melanogaster GN=CG4306 PE=2 SV=1	1	1.01	1.12	1.08	1.04	0.87	0.87	10	4	24	20.5	0.0833903	1.0525	0.926667	0.880443	1.07888
1068.1	sp|P22769|PSA71_DROME	Proteasome subunit alpha type-7-1 OS=Drosophila melanogaster GN=Pros28.1 PE=1 SV=2	0.99	0.94	1.02	0.96	1.06	1.02	1.01	27	7	28	48.3	0.0834412	0.9775	1.03	1.05371	1.07862
1549.1	sp|P07191|MAL1_DROME	Probable maltase D OS=Drosophila melanogaster GN=LvpD PE=2 SV=2	0.94	0.85	1.07	0.92	1.02	1.12	1.08	16	9	65	12.4	0.0835987	0.945	1.07333	1.1358	1.0778
1444.1	sp|Q9VIW3|RAGP1_DROME	Ran GTPase-activating protein OS=Drosophila melanogaster GN=RanGap PE=1 SV=1	0.94	0.99	1.01	0.98	1.03	1.04	1	18	8	66	13.6	0.0837429	0.98	1.02333	1.04422	1.07705
3802.1	sp|Q9VWH8|KISH_DROME	Protein kish OS=Drosophila melanogaster GN=kish PE=3 SV=1	1.01	0.97	0.96	0.98	1.06	1	1.01	3	2	8	17.9	0.0837429	0.98	1.02333	1.04422	1.07705
2010.3	tr|Q9VBT3|Q9VBT3_DROME	CG13658 OS=Drosophila melanogaster GN=CG13658 PE=2 SV=3	1.03	0.67	0.99	0.76	1.44	1.06	1.05	3	2	49	3	0.0841687	0.8625	1.18333	1.37198	1.07485
5192.1	tr|Q9VD91|Q9VD91_DROME	CG15497 OS=Drosophila melanogaster GN=CG15497 PE=2 SV=1	0.88	1.02	0.91	0.92	1.25	1.01	1.02	1	1	30	1.7	0.0841883	0.9325	1.09333	1.17248	1.07475
4416.1	tr|Q9VL41|Q9VL41_DROME	CG13133 OS=Drosophila melanogaster GN=CG13133 PE=2 SV=1	1.1	1.02	1	1.02	1	0.97	0.89	2	1	25	4.1	0.0842415	1.035	0.953333	0.921095	1.07447
3003.1	tr|Q9VHV6|Q9VHV6_DROME	CG9667 OS=Drosophila melanogaster GN=CG9667 PE=2 SV=2	0.96	0.82	1.03	0.96	1.14	1.07	1.01	5	4	31	8	0.0842494	0.9425	1.07333	1.13882	1.07443
5543.1	tr|A1ZB54|A1ZB54_DROME	CG18536, isoform A OS=Drosophila melanogaster GN=CG18536 PE=4 SV=1	1.06	0.96	0.91	0.91	1.05	1.03	1.08	1	1	22	2.3	0.0850515	0.96	1.05333	1.09722	1.07032
140.1	sp|P20228|DCE_DROME	Glutamate decarboxylase OS=Drosophila melanogaster GN=Gad1 PE=1 SV=2	0.97	0.92	1.03	0.95	1.07	1.07	0.99	195	10	58	168.7	0.085085	0.9675	1.04333	1.07838	1.07015
47.1	sp|Q00963|SPTCB_DROME	Spectrin beta chain OS=Drosophila melanogaster GN=beta-Spec PE=1 SV=2	0.97	0.92	1.04	0.97	1.05	1.02	1.05	634	93	266	119.4	0.0852043	0.975	1.04	1.06667	1.06954
1836.1	sp|Q9W3W8|RL17_DROME	60S ribosomal protein L17 OS=Drosophila melanogaster GN=RpL17 PE=1 SV=1	0.95	0.85	1.05	0.95	1.11	1.02	1.06	13	4	22	30.1	0.0854437	0.95	1.06333	1.1193	1.06832
5464.1	sp|Q9VIZ0|RPAC2_DROME	Probable DNA-directed RNA polymerases I and III subunit RPAC2 OS=Drosophila melanogaster GN=l(2)37Cg PE=1 SV=1	1.05	1	1.04	1.03	0.89	1.01	0.98	1	1	12	4.2	0.0856812	1.03	0.96	0.932039	1.06711
721.1	tr|Q9VG69|Q9VG69_DROME	CG5844 OS=Drosophila melanogaster GN=CG5844 PE=2 SV=1	0.99	0.92	1.03	0.94	1.07	1.01	1.04	41	8	42	49.3	0.0856812	0.97	1.04	1.07216	1.06711
4866.1	sp|Q9W590|LSG1_DROME	Large subunit GTPase 1 homolog OS=Drosophila melanogaster GN=ns3 PE=1 SV=1	1.07	1.04	1.05	0.97	0.92	1.01	0.95	1	1	70	0.7	0.0857531	1.0325	0.96	0.929782	1.06675
2327.1	tr|Q9VK39|Q9VK39_DROME	CG9928 OS=Drosophila melanogaster GN=CG9928-RA PE=2 SV=1	1	0.87	1.03	0.93	1.06	1.06	1.03	9	3	11	39.3	0.0857548	0.9575	1.05	1.09661	1.06674
922.1	tr|A1Z6Q0|A1Z6Q0_DROME	CG3287, isoform B OS=Drosophila melanogaster GN=CG3287 PE=4 SV=1	0.98	0.94	1.02	0.97	1.05	1.03	1	31	10	52	30	0.0857565	0.9775	1.02667	1.0503	1.06673
1569.1	tr|Q8T043|Q8T043_DROME	CG3409, isoform A OS=Drosophila melanogaster GN=CG3409-RA PE=2 SV=1	1	0.93	0.98	0.98	1.09	0.99	1.03	16	6	99	8.1	0.0858477	0.9725	1.03667	1.06598	1.06627
4500.1	tr|Q9VPI2|Q9VPI2_DROME	Ionotropic receptor 21a OS=Drosophila melanogaster GN=Ir21a PE=2 SV=2	0.78	0.71	1.2	0.77	1.13	1.08	1.34	2	1	96	1.1	0.0858657	0.865	1.18333	1.36802	1.06618
1210.1	tr|Q7KVL7|Q7KVL7_DROME	Vacuolar protein sorting 35, isoform A OS=Drosophila melanogaster GN=Vps35 PE=4 SV=2	0.98	0.96	1.02	0.97	1.05	1.01	1.01	23	8	91	12.6	0.0860923	0.9825	1.02333	1.04156	1.06504
626.2	tr|Q86LF6|Q86LF6_DROME	CG33205, isoform I OS=Drosophila melanogaster GN=CG33205 PE=2 SV=1	1.01	0.93	1.01	0.95	1.06	1.05	1	39	8	23	84.8	0.0861153	0.975	1.03667	1.06325	1.06492
825.1	tr|A1ZAY4|A1ZAY4_DROME	CG4984, isoform A OS=Drosophila melanogaster GN=CG4984-RB PE=2 SV=1	0.99	0.9	1.03	0.94	1.07	1.01	1.05	35	10	51	34.6	0.0861417	0.965	1.04333	1.08117	1.06479
768.1	tr|Q0KIB9|Q0KIB9_DROME	L(3)82Fd, isoform P OS=Drosophila melanogaster GN=l(3)82Fd PE=4 SV=1	1.02	0.89	1.02	0.92	1.07	1.05	1.03	38	15	143	13.3	0.0864869	0.9625	1.05	1.09091	1.06305
2219.1	sp|Q9VZZ4|PXDN_DROME	Peroxidasin OS=Drosophila melanogaster GN=Pxn PE=1 SV=1	0.93	0.85	1.06	0.91	1.13	1.13	0.98	9	7	170	2.6	0.0867413	0.9375	1.08	1.152	1.06177
614.1	sp|A1Z8N1|TRE11_DROME	Facilitated trehalose transporter Tret1-1 OS=Drosophila melanogaster GN=Tret1-1 PE=1 SV=1	0.96	0.87	1.07	0.9	1.1	1.03	1.07	48	9	95	25.2	0.0870909	0.95	1.06667	1.12281	1.06003
1142.1	tr|Q7KTJ7|Q7KTJ7_DROME	Basigin, isoform G OS=Drosophila melanogaster GN=Bsg PE=4 SV=1	0.98	0.93	1.03	0.93	1.1	1.04	1	25	7	70	17.7	0.087397	0.9675	1.04667	1.08183	1.0585
1021.1	tr|Q9W0H6|Q9W0H6_DROME	CG9149 OS=Drosophila melanogaster GN=CG9149 PE=2 SV=2	0.98	0.91	1.01	0.98	1.1	1.02	1.01	28	10	41	34	0.0876261	0.97	1.04333	1.0756	1.05737
323.1	tr|Q9VK60|Q9VK60_DROME	CG6180 OS=Drosophila melanogaster GN=CG6180 PE=2 SV=2	0.96	0.88	1.05	0.95	1.08	1.08	1.01	89	8	29	155.1	0.087806	0.96	1.05667	1.10069	1.05648
3939.1	sp|Q8MKJ4|OB57B_DROME	General odorant-binding protein 57b OS=Drosophila melanogaster GN=Obp57b PE=2 SV=1	0.93	0.92	0.96	1.01	0.98	1.04	1.15	3	1	17	9	0.0878293	0.955	1.05667	1.10646	1.05636
3016.1	tr|Q8IMR7|Q8IMR7_DROME	CG31082 OS=Drosophila melanogaster GN=CG31082 PE=1 SV=1	0.95	0.91	1.04	0.94	1.11	1.06	0.99	5	4	89	2.8	0.0878833	0.96	1.05333	1.09722	1.05609
5634.1	tr|A8JUV7|A8JUV7_DROME	Brother of iHog, isoform D OS=Drosophila melanogaster GN=boi PE=4 SV=2	0.85	0.87	1.01	0.86	1.19	1.32	0.9	1	1	121	0.4	0.0879927	0.8975	1.13667	1.26648	1.05555
1132.1	tr|Q9VEK8|Q9VEK8_DROME	GH07711p OS=Drosophila melanogaster GN=sds22 PE=2 SV=1	0.99	0.94	1.01	0.94	1.06	1.08	0.98	25	9	38	33.1	0.0881977	0.97	1.04	1.07216	1.05454
3675.2	tr|A8DYF7|A8DYF7_DROME	Mrj, isoform E OS=Drosophila melanogaster GN=mrj PE=4 SV=1	0.93	0.85	1.02	0.9	1.26	1.04	0.99	3	3	39	3.9	0.0882676	0.925	1.09667	1.18559	1.0542
1251.1	tr|Q9VAG9|Q9VAG9_DROME	CG7789 OS=Drosophila melanogaster GN=CG7789 PE=2 SV=1	1.02	0.89	1.02	0.9	1.1	1.05	1.02	22	6	33	33.8	0.0886761	0.9575	1.05667	1.10357	1.05219
470.1	sp|P81900|KAPR2_DROME	cAMP-dependent protein kinase type II regulatory subunit OS=Drosophila melanogaster GN=Pka-R2 PE=1 SV=2	0.95	0.95	1.02	0.98	1.04	1.08	0.99	64	12	43	74.9	0.0893561	0.975	1.03667	1.06325	1.04888
2663.1	tr|Q9VF98|Q9VF98_DROME	IP03487p OS=Drosophila melanogaster GN=l(3)neo43 PE=4 SV=2	0.92	0.95	1.02	1.01	1.02	1.05	1.04	7	3	10	36.6	0.0893561	0.975	1.03667	1.06325	1.04888
3908.1	tr|B7Z0P8|B7Z0P8_DROME	CG6364, isoform B OS=Drosophila melanogaster GN=CG6364 PE=4 SV=1	1.12	1.02	1.01	0.98	0.96	0.95	0.96	3	2	34	4.4	0.0893725	1.0325	0.956667	0.926554	1.0488
2571.1	tr|Q8SXS0|Q8SXS0_DROME	CG7071, isoform A OS=Drosophila melanogaster GN=CG7071 PE=2 SV=1	0.92	0.96	0.97	1.02	1.1	1.04	0.99	7	5	35	10.1	0.0893725	0.9675	1.04333	1.07838	1.0488
2780.1	sp|Q9VVX5|NESSY_DROME	Transmembrane protein nessy OS=Drosophila melanogaster GN=nes PE=1 SV=1	0.96	0.98	1.01	0.92	1.11	1.02	1	6	4	57	5.2	0.0893725	0.9675	1.04333	1.07838	1.0488
1081.1	tr|Q961Q8|Q961Q8_DROME	CG10562 OS=Drosophila melanogaster GN=CG10562 PE=2 SV=1	0.97	0.89	1.04	0.88	1.16	1.05	1	26	14	46	28.2	0.0894804	0.945	1.07	1.13228	1.04827
5448.1	tr|Q7KNM2|Q7KNM2_DROME	Ubiquitin carrier protein OS=Drosophila melanogaster GN=lwr PE=2 SV=1	0.88	1.02	0.93	0.94	1.12	1.17	0.95	1	1	18	2.8	0.0895194	0.9425	1.08	1.14589	1.04808
1826.1	tr|Q9VAY0|Q9VAY0_DROME	CG5527 OS=Drosophila melanogaster GN=CG5527 PE=1 SV=1	0.93	0.95	1.06	0.91	1.07	1.02	1.06	13	5	82	7.9	0.0897054	0.9625	1.05	1.09091	1.04718
2795.1	tr|Q9VGJ6|Q9VGJ6_DROME	CG6908 OS=Drosophila melanogaster GN=CG6908 PE=2 SV=1	0.97	0.88	1.02	0.94	1.01	1.02	1.15	6	4	52	5.8	0.0898271	0.9525	1.06	1.11286	1.04659
3138.1	tr|Q9W438|Q9W438_DROME	GH13296p OS=Drosophila melanogaster GN=Mipp2 PE=2 SV=1	1.17	0.93	1.19	1.02	1	0.85	0.85	5	2	53	4.7	0.0898282	1.0775	0.9	0.835267	1.04659
5663.1	tr|Q4AB27|Q4AB27_DROME	Myosin 95E, isoform E OS=Drosophila melanogaster GN=Myo95E PE=4 SV=1	0.72	0.79	1.01	1.01	1.12	1.38	0.98	1	1	148	0.3	0.0899154	0.8825	1.16	1.31445	1.04617
2494.1	sp|Q9VYY2|SPCS2_DROME	Signal peptidase complex subunit 2 OS=Drosophila melanogaster GN=Spase25 PE=2 SV=1	0.95	0.96	1.01	0.91	1.1	0.96	1.11	8	3	22	18	0.0899279	0.9575	1.05667	1.10357	1.04611
626.1	tr|Q8IGP1|Q8IGP1_DROME	CG33205, isoform B OS=Drosophila melanogaster GN=CG8154 PE=2 SV=1	1	0.92	1.02	0.95	1.07	1.05	1	47	10	56	41.9	0.0900141	0.9725	1.04	1.06941	1.04569
4713.1	sp|Q9VCE8|U692_DROME	UPF0692 protein CG33108 OS=Drosophila melanogaster GN=CG33108 PE=2 SV=2	1	1.04	1.08	0.99	0.99	0.98	0.91	1	1	29	1.7	0.0900141	1.0275	0.96	0.934307	1.04569
863.1	tr|Q9VH81|Q9VH81_DROME	GH12714p OS=Drosophila melanogaster GN=PpD3 PE=2 SV=1	0.96	0.91	1.04	0.98	1.04	1.03	1.05	33	15	59	27.9	0.0900141	0.9725	1.04	1.06941	1.04569
4420.1	tr|Q9VTE8|Q9VTE8_DROME	CG6272 OS=Drosophila melanogaster GN=CG6272 PE=2 SV=1	0.92	1.02	0.98	0.96	1.05	0.99	1.07	2	1	13	7.7	0.0901448	0.97	1.03667	1.06873	1.04506
63.1	sp|Q9VWH4|IDH3A_DROME	Probable isocitrate dehydrogenase [NAD] subunit alpha, mitochondrial OS=Drosophila melanogaster GN=l(1)G0156 PE=2 SV=1	0.97	0.9	1.03	0.98	1.04	1.04	1.03	512	21	41	627.2	0.0901448	0.97	1.03667	1.06873	1.04506
2214.1	tr|Q9W197|Q9W197_DROME	CG3362 OS=Drosophila melanogaster GN=CG3362 PE=2 SV=1	1.05	0.98	1.05	1.02	1	0.98	0.93	9	7	36	12.4	0.0901703	1.025	0.97	0.946341	1.04494
361.1	tr|Q9W227|Q9W227_DROME	Peptidyl-prolyl cis-trans isomerase OS=Drosophila melanogaster GN=CG2852 PE=2 SV=1	0.98	0.95	1.01	0.98	0.99	1.05	1.03	82	9	22	184.8	0.0903086	0.98	1.02333	1.04422	1.04427
3853.1	sp|Q9VLU5|WWOX_DROME	WW domain-containing oxidoreductase OS=Drosophila melanogaster GN=Wwox PE=2 SV=1	1.02	0.87	1	0.95	1.09	1	1.08	3	2	46	3.2	0.090441	0.96	1.05667	1.10069	1.04363
5051.1	tr|Q9VXK9|Q9VXK9_DROME	CG9170, isoform A OS=Drosophila melanogaster GN=CG9170 PE=2 SV=1	0.79	0.98	0.89	1.07	1.11	1.11	1.04	1	1	140	0.4	0.0906502	0.9325	1.08667	1.16533	1.04263
5545.1	tr|Q9VD87|Q9VD87_DROME	CG5849, isoform A OS=Drosophila melanogaster GN=CG5849 PE=2 SV=2	0.98	1.1	0.98	1.14	1	0.91	0.88	1	1	112	0.5	0.0906573	1.05	0.93	0.885714	1.0426
958.3	sp|Q9V771|C6A23_DROME	Probable cytochrome P450 6a23 OS=Drosophila melanogaster GN=Cyp6a23 PE=2 SV=2	1.02	0.95	1.01	0.9	1.04	1.05	1.03	16	7	58	13.8	0.0907096	0.97	1.04	1.07216	1.04235
1943.1	sp|Q86BN8|PTPM1_DROME	Protein-tyrosine phosphatase mitochondrial 1-like protein OS=Drosophila melanogaster GN=Plip PE=2 SV=1	0.97	0.91	1	1	1.09	1.03	1	12	4	23	25.9	0.0907096	0.97	1.04	1.07216	1.04235
437.1	sp|P11584|ITBX_DROME	Integrin beta-PS OS=Drosophila melanogaster GN=mys PE=1 SV=3	1.01	0.94	1.01	0.96	1.03	1.04	1.01	69	14	93	37.3	0.0907096	0.98	1.02667	1.04762	1.04235
4681.1	sp|Q8MKK0|OB57A_DROME	General odorant-binding protein 57a OS=Drosophila melanogaster GN=Obp57a PE=2 SV=1	1.03	0.9	0.93	0.95	0.98	1.16	1.06	1	1	19	2.6	0.0907361	0.9525	1.06667	1.11986	1.04222
5118.1	tr|Q9VD81|Q9VD81_DROME	DNA-directed RNA polymerase subunit OS=Drosophila melanogaster GN=RpI12 PE=2 SV=1	0.83	0.9	1.04	0.98	1.12	0.98	1.15	1	1	14	3.7	0.0909264	0.9375	1.08333	1.15556	1.04131
1098.1	tr|Q9VJ44|Q9VJ44_DROME	CG17597 OS=Drosophila melanogaster GN=CG17597 PE=2 SV=2	1	0.9	1.04	0.86	1.09	1.02	1.07	26	8	44	29.6	0.0911865	0.95	1.06	1.11579	1.04007
1388.1	tr|Q7JXF5|Q7JXF5_DROME	GH12838p OS=Drosophila melanogaster GN=Nup62 PE=2 SV=1	1	0.92	1.03	0.92	1.02	1.09	1.03	19	9	41	23.4	0.0913251	0.9675	1.04667	1.08183	1.03941
2426.1	sp|Q7PLI7|DCLK_DROME	Serine/threonine-protein kinase CG17528 OS=Drosophila melanogaster GN=CG17528 PE=1 SV=1	0.98	0.89	1.02	0.98	1.04	1.09	1.01	8	5	83	4.8	0.0913251	0.9675	1.04667	1.08183	1.03941
3943.1	tr|Q4V480|Q4V480_DROME	Cuticular protein 92A OS=Drosophila melanogaster GN=Cpr92A PE=2 SV=1	0.82	1.02	0.83	0.76	1.49	1.19	0.89	3	1	25	5.9	0.0915296	0.8575	1.19	1.38776	1.03844
1770.1	tr|Q9W350|Q9W350_DROME	C11.1 OS=Drosophila melanogaster GN=c11.1 PE=2 SV=2	1	0.89	1.02	0.83	1.2	1.06	1	13	10	193	3.4	0.0920452	0.935	1.08667	1.16221	1.036
1774.1	tr|Q9VZ00|Q9VZ00_DROME	CG1737 OS=Drosophila melanogaster GN=CG1737 PE=2 SV=1	1	0.94	1.02	0.93	1.09	1.04	1	13	9	102	6.4	0.092078	0.9725	1.04333	1.07284	1.03584
4628.1	tr|Q9VY18|Q9VY18_DROME	Antigen 5-related OS=Drosophila melanogaster GN=Ag5r PE=2 SV=1	1.13	0.88	0.79	0.78	1.04	1.29	1.08	1	1	28	1.8	0.0921245	0.895	1.13667	1.27002	1.03562
3483.1	tr|Q9VQ34|Q9VQ34_DROME	CG17660 OS=Drosophila melanogaster GN=CG17660 PE=2 SV=3	1.05	0.91	0.96	0.94	1.04	1.02	1.07	4	2	60	3.3	0.0921605	0.965	1.04333	1.08117	1.03546
2459.1	sp|Q9VKX4|RT07_DROME	28S ribosomal protein S7, mitochondrial OS=Drosophila melanogaster GN=mRpS7 PE=1 SV=1	1.04	1.02	1.08	1.04	1.04	0.94	0.84	8	4	25	15.9	0.0923814	1.045	0.94	0.899522	1.03442
1190.1	tr|Q9W2L7|Q9W2L7_DROME	CG34396, isoform D OS=Drosophila melanogaster GN=CG34396 PE=2 SV=2	1.01	0.98	0.98	0.93	1.08	1.02	1	23	13	111	10.4	0.092515	0.975	1.03333	1.05983	1.03379
4370.1	tr|Q9W2Y4|Q9W2Y4_DROME	CG2972 OS=Drosophila melanogaster GN=CG2972 PE=2 SV=2	1.04	0.89	1.01	0.88	1.06	1.04	1.07	2	1	54	1.9	0.0925897	0.955	1.05667	1.10646	1.03344
5561.1	tr|Q9W1I0|Q9W1I0_DROME	TBPH, isoform A OS=Drosophila melanogaster GN=TBPH PE=2 SV=2	1.04	1.01	1.13	1.06	0.96	1.02	0.78	1	1	38	1.3	0.0925902	1.06	0.92	0.867925	1.03344
4625.1	tr|Q95TJ6|Q95TJ6_DROME	CG8907 OS=Drosophila melanogaster GN=CG8907 PE=2 SV=1	1.07	0.96	1.11	1.04	0.98	0.98	0.85	1	1	80	0.6	0.0926644	1.045	0.936667	0.896332	1.03309
4278.1	tr|Q9VNC7|Q9VNC7_DROME	CG31547, isoform B OS=Drosophila melanogaster GN=CG2509 PE=2 SV=2	0.97	0.93	1.06	0.83	1.1	1.02	1.1	2	2	118	0.8	0.0927265	0.9475	1.07333	1.13281	1.0328
3979.1	tr|Q7KTX4|Q7KTX4_DROME	AT08232p OS=Drosophila melanogaster GN=CG33286 PE=2 SV=2	0.93	0.96	0.96	1	0.97	1.05	1.13	3	1	124	1.2	0.0929158	0.9625	1.05	1.09091	1.03191
1877.1	tr|Q59E61|Q59E61_DROME	Sterile20-like kinase, isoform E OS=Drosophila melanogaster GN=slik PE=4 SV=1	0.91	0.91	1.03	1	1.1	1.02	1.03	12	8	152	4	0.0929158	0.9625	1.05	1.09091	1.03191
1646.1	sp|Q9V4U9|C6A13_DROME	Probable cytochrome P450 6a13 OS=Drosophila melanogaster GN=Cyp6a13 PE=1 SV=1	0.93	0.9	1.03	0.94	0.96	1.1	1.15	15	5	58	13	0.0932163	0.95	1.07	1.12632	1.03051
4470.1	tr|Q9VVL0|Q9VVL0_DROME	Cln3 OS=Drosophila melanogaster GN=cln3 PE=2 SV=2	0.89	0.67	1.11	0.79	1.32	1.29	0.93	2	1	48	2.1	0.0932472	0.865	1.18	1.36416	1.03036
2869.1	sp|Q9VEG9|NRM_DROME	Nurim homolog OS=Drosophila melanogaster GN=nrm PE=1 SV=1	0.91	0.99	0.97	0.98	0.99	1.03	1.15	6	3	29	10.5	0.0932644	0.9625	1.05667	1.09784	1.03028
2332.1	sp|Q9VN12-2|NCKXH_DROME	Isoform A of Probable sodium/potassium/calcium exchanger CG1090 OS=Drosophila melanogaster GN=CG1090	1	0.93	1.02	0.87	1.04	1.01	1.15	9	3	52	8.7	0.093353	0.955	1.06667	1.11693	1.02987
277.2	sp|Q9VA73-2|CMC_DROME	Isoform 2 of Calcium-binding mitochondrial carrier protein Aralar1 OS=Drosophila melanogaster GN=aralar1	1	0.91	1.04	0.91	1.05	1.03	1.06	98	22	75	65.3	0.0934718	0.965	1.04667	1.08463	1.02932
2293.1	tr|Q8SWU4|Q8SWU4_DROME	CG4577 OS=Drosophila melanogaster GN=CG4577 PE=2 SV=1	1.01	0.89	1.01	0.91	1.14	1.03	1.01	9	4	49	9.2	0.0934945	0.955	1.06	1.10995	1.02921
3262.1	sp|Q00449|MDR49_DROME	Multidrug resistance protein homolog 49 OS=Drosophila melanogaster GN=Mdr49 PE=1 SV=2	1.01	0.85	1.04	0.91	1.05	1.11	1.04	4	4	143	1.4	0.0935627	0.9525	1.06667	1.11986	1.0289
162.1	sp|Q9VU58|NPLP2_DROME	Neuropeptide-like 2 OS=Drosophila melanogaster GN=Nplp2 PE=1 SV=1	0.96	0.88	1.05	0.87	1.04	1.01	1.18	166	5	9	882.3	0.0935812	0.94	1.07667	1.14539	1.02881
2833.1	tr|B7Z098|B7Z098_DROME	CG7414, isoform B OS=Drosophila melanogaster GN=CG7414 PE=4 SV=1	1.05	1	1.08	1	1	0.98	0.89	6	4	77	3.9	0.0936459	1.0325	0.956667	0.926554	1.02851
892.1	tr|E2QCZ0|E2QCZ0_DROME	Synapsin, isoform E OS=Drosophila melanogaster GN=Syn PE=4 SV=1	0.96	0.94	1.04	0.93	1	1.04	1.09	32	13	64	25	0.0936459	0.9675	1.04333	1.07838	1.02851
4717.1	tr|Q9VMI2|Q9VMI2_DROME	CG13994 OS=Drosophila melanogaster GN=CG13994 PE=2 SV=1	0.96	1.06	1.05	1.1	0.89	1.02	0.92	1	1	18	2.8	0.0936754	1.0425	0.943333	0.904876	1.02837
1283.1	tr|Q7K533|Q7K533_DROME	CG11395 OS=Drosophila melanogaster GN=CG11395 PE=2 SV=1	0.96	0.92	1.06	0.87	1.11	1.03	1.04	21	7	49	21.5	0.0940786	0.9525	1.06	1.11286	1.02651
1941.1	tr|A4V0S1|A4V0S1_DROME	Syntaxin 5, isoform B OS=Drosophila melanogaster GN=Syx5 PE=3 SV=1	0.93	0.86	1.06	0.96	1.1	1.03	1.05	12	4	52	11.6	0.0940786	0.9525	1.06	1.11286	1.02651
5628.1	tr|Q4V4C8|Q4V4C8_DROME	Glycoprotein hormone beta 5, isoform A OS=Drosophila melanogaster GN=Gpb5 PE=2 SV=1	0.92	0.9	1.08	0.92	1.11	1.02	1.07	1	1	19	2.7	0.0943363	0.955	1.06667	1.11693	1.02532
4321.1	tr|Q9VNU6|Q9VNU6_DROME	Tenascin major, isoform B OS=Drosophila melanogaster GN=Ten-m PE=2 SV=2	0.91	0.94	1.02	0.88	1.22	1.06	0.97	2	2	304	0.3	0.0943895	0.9375	1.08333	1.15556	1.02508
5018.1	tr|Q9W4D3|Q9W4D3_DROME	CG15930 OS=Drosophila melanogaster GN=CG15930 PE=4 SV=2	1.11	0.81	0.86	0.94	1.07	1.08	1.13	1	1	58	0.9	0.094391	0.93	1.09333	1.17563	1.02507
1098.2	tr|Q9VJ43|Q9VJ43_DROME	LD10783p OS=Drosophila melanogaster GN=ScpX PE=2 SV=1	0.97	0.92	1.06	0.87	1.1	1.03	1.05	25	7	59	21.2	0.0946064	0.955	1.06	1.10995	1.02408
1379.1	tr|Q9VMF0|Q9VMF0_DROME	CG9498 OS=Drosophila melanogaster GN=CG9498-RA PE=2 SV=1	0.91	0.92	1.06	0.9	1.05	1	1.15	19	10	49	19.5	0.0946852	0.9475	1.06667	1.12577	1.02372
1839.1	tr|Q9VV00|Q9VV00_DROME	CG32154 OS=Drosophila melanogaster GN=CG32154-RA PE=2 SV=2	0.9	0.89	1.03	1	1.08	1.12	0.99	13	4	39	16.5	0.0947543	0.955	1.06333	1.11344	1.0234
4466.1	sp|P52656|T2AG_DROME	Transcription initiation factor IIA subunit 2 OS=Drosophila melanogaster GN=TfIIA-S PE=1 SV=1	1.02	0.97	1	0.9	1.04	1.04	1.03	2	1	12	8.2	0.0948085	0.9725	1.03667	1.06598	1.02315
5090.1	tr|Q9VS66|Q9VS66_DROME	CG8562 OS=Drosophila melanogaster GN=CG8562 PE=2 SV=1	0.99	0.89	0.99	0.83	1.07	1.26	0.97	1	1	48	1.1	0.0949176	0.925	1.1	1.18919	1.02265
3215.1	tr|A1Z9K0|A1Z9K0_DROME	CG6701 OS=Drosophila melanogaster GN=CG6701 PE=4 SV=1	1.03	0.91	1	0.89	1.03	1.12	1.02	4	4	142	1.4	0.0949217	0.9575	1.05667	1.10357	1.02263
3056.1	tr|Q9W2T3|Q9W2T3_DROME	CG2124 OS=Drosophila melanogaster GN=CG2124 PE=2 SV=1	1.06	0.87	0.98	0.88	1.13	1.06	1.02	5	3	73	3.4	0.0951053	0.9475	1.07	1.12929	1.0218
1622.1	sp|Q8T0R7|IDGF5_DROME	Chitinase-like protein Idgf5 OS=Drosophila melanogaster GN=Idgf5 PE=2 SV=3	0.97	0.86	1.07	0.82	1.15	0.99	1.14	15	7	50	15	0.0953093	0.93	1.09333	1.17563	1.02086
734.1	sp|Q9W2N0|CAPZA_DROME	F-actin-capping protein subunit alpha OS=Drosophila melanogaster GN=cpa PE=1 SV=1	0.95	0.93	1.03	0.97	1.07	1.05	0.99	40	9	33	61.1	0.0956672	0.97	1.03667	1.06873	1.01924
4170.1	tr|Q9W0H9|Q9W0H9_DROME	CG9139 OS=Drosophila melanogaster GN=Rabex-5 PE=2 SV=1	0.9	0.89	1.09	0.9	1.14	1.07	1.02	2	2	77	1.3	0.0956707	0.945	1.07667	1.13933	1.01922
1152.1	sp|Q9VK45|TOR_DROME	Target of rapamycin OS=Drosophila melanogaster GN=Tor PE=1 SV=1	0.99	0.94	1.01	0.94	1.1	1.03	0.99	24	17	281	4.3	0.0957171	0.97	1.04	1.07216	1.01901
2292.1	tr|Q9VPQ2|Q9VPQ2_DROME	CG4164 OS=Drosophila melanogaster GN=CG4164 PE=2 SV=1	0.96	0.88	1.03	0.83	1	1.04	1.26	9	4	40	11.2	0.0957171	0.925	1.1	1.18919	1.01901
16.1	tr|A1Z9J3|A1Z9J3_DROME	Short stop, isoform H OS=Drosophila melanogaster GN=shot PE=4 SV=1	0.99	0.91	1.04	0.93	1.07	1.02	1.04	1531	273	989	77.4	0.0957763	0.9675	1.04333	1.07838	1.01874
2846.1	tr|Q9VFS4|Q9VFS4_DROME	CG14367 OS=Drosophila melanogaster GN=CG14367 PE=1 SV=1	1	0.82	1.06	0.85	1.11	1.01	1.15	6	3	35	8.5	0.0958405	0.9325	1.09	1.1689	1.01845
5223.1	tr|Q9VSE8|Q9VSE8_DROME	CG7979 OS=Drosophila melanogaster GN=CG7979 PE=2 SV=1	0.96	0.68	1.02	0.86	1.4	1.01	1.06	1	1	50	1	0.0959198	0.88	1.15667	1.31439	1.01809
2474.1	tr|A8DYW5|A8DYW5_DROME	Sodium/hydrogen exchanger OS=Drosophila melanogaster GN=Nhe3 PE=3 SV=3	1.02	0.98	1.05	1.04	1.01	0.96	0.95	8	4	77	5.2	0.0959266	1.0225	0.973333	0.951915	1.01806
1814.1	tr|Q7KSB3|Q7KSB3_DROME	Oxysterol-binding protein OS=Drosophila melanogaster GN=CG5077 PE=3 SV=4	1	0.97	1.01	0.97	1.02	1	1.03	13	6	107	6.1	0.0961167	0.9875	1.01667	1.02954	1.0172
2420.1	tr|Q9VYW6|Q9VYW6_DROME	Rhomboid-4 OS=Drosophila melanogaster GN=rho-4 PE=2 SV=2	0.9	0.9	1.03	0.99	1.13	1.03	1.01	8	5	48	8.3	0.0961466	0.955	1.05667	1.10646	1.01707
2083.1	sp|Q9VNH6|EXOC4_DROME	Exocyst complex component 4 OS=Drosophila melanogaster GN=sec8 PE=1 SV=3	1.03	0.92	1	0.9	1.02	1.03	1.09	10	8	112	4.5	0.0964465	0.9625	1.04667	1.08745	1.01571
4221.1	tr|Q9VQ16|Q9VQ16_DROME	CG7420 OS=Drosophila melanogaster GN=CG7420 PE=2 SV=2	0.86	0.9	1.03	0.96	1.06	1.21	0.98	2	2	41	2.4	0.0966917	0.9375	1.08333	1.15556	1.01461
3180.1	tr|Q95SE8|Q95SE8_DROME	CG11009, isoform B OS=Drosophila melanogaster GN=CG11009 PE=2 SV=1	0.93	0.79	1.05	0.89	1.3	0.99	1.07	5	2	35	7.1	0.0967863	0.915	1.12	1.22404	1.01419
118.3	sp|P29310-3|1433Z_DROME	Isoform C of 14-3-3 protein zeta OS=Drosophila melanogaster GN=14-3-3zeta	0.93	0.96	1.02	1	1.01	1.05	1.03	209	11	28	369.4	0.0968266	0.9775	1.03	1.05371	1.01401
434.1	tr|Q8MLQ5|Q8MLQ5_DROME	CG5594, isoform D OS=Drosophila melanogaster GN=kcc PE=2 SV=1	0.95	0.95	1.04	0.97	1.04	1.02	1.03	69	19	119	28.9	0.0968266	0.9775	1.03	1.05371	1.01401
4745.1	tr|Q9VUZ1|Q9VUZ1_DROME	CG5161 OS=Drosophila melanogaster GN=CG5161 PE=2 SV=2	0.9	0.86	1	1.02	1.12	0.97	1.13	1	1	17	3	0.0970373	0.945	1.07333	1.1358	1.01306
2064.1	tr|Q9VQI6|Q9VQI6_DROME	CG8814 OS=Drosophila melanogaster GN=CG8814 PE=2 SV=1	0.9	0.9	1.05	0.98	1.01	1.06	1.09	11	3	36	15.2	0.0970405	0.9575	1.05333	1.10009	1.01305
1369.1	tr|Q9VXR3|Q9VXR3_DROME	CG8184 OS=Drosophila melanogaster GN=CG8184 PE=2 SV=2	1	0.93	1.03	0.9	1.09	1.03	1.02	19	15	557	1.7	0.0971433	0.965	1.04667	1.08463	1.01259
3125.1	tr|A1Z6R8|A1Z6R8_DROME	CG3358, isoform C OS=Drosophila melanogaster GN=CG3358 PE=4 SV=2	0.91	0.94	0.99	1.02	1.11	1.03	1	5	3	35	7.2	0.0971433	0.965	1.04667	1.08463	1.01259
1994.1	tr|Q7JZR5|Q7JZR5_DROME	CG6796 OS=Drosophila melanogaster GN=CG6796 PE=2 SV=1	1.03	0.91	1	0.93	1.09	1.04	1.01	11	7	52	10.5	0.0971916	0.9675	1.04667	1.08183	1.01237
4504.1	sp|Q05733|DCHS_DROME	Histidine decarboxylase OS=Drosophila melanogaster GN=Hdc PE=1 SV=2	0.76	0.85	1.08	0.9	1.18	0.94	1.29	2	1	94	1.1	0.0976467	0.8975	1.13667	1.26648	1.01034
1609.1	tr|Q9VAG5|Q9VAG5_DROME	Claret OS=Drosophila melanogaster GN=ca PE=2 SV=4	1.02	0.9	0.99	0.94	1.12	1.01	1.02	15	8	218	3.4	0.0977131	0.9625	1.05	1.09091	1.01005
4341.1	tr|Q7KU53|Q7KU53_DROME	CG15445, isoform C OS=Drosophila melanogaster GN=CG15445 PE=2 SV=1	0.96	0.84	1.05	0.89	1.21	1.03	1.02	2	2	65	1.6	0.0979019	0.935	1.08667	1.16221	1.00921
1089.1	tr|Q86P18|Q86P18_DROME	CG33970, isoform A OS=Drosophila melanogaster GN=CG6166 PE=2 SV=1	1.02	0.92	1	0.93	1.06	0.99	1.08	26	11	86	15.1	0.0979019	0.9675	1.04333	1.07838	1.00921
1528.1	sp|Q24214|CANB2_DROME	Calcineurin subunit B type 2 OS=Drosophila melanogaster GN=CanB2 PE=1 SV=2	0.93	0.94	1.02	0.98	1	1.02	1.11	17	5	19	44.1	0.0979019	0.9675	1.04333	1.07838	1.00921
1854.1	sp|O17445|RL15_DROME	60S ribosomal protein L15 OS=Drosophila melanogaster GN=RpL15 PE=2 SV=1	1	1.09	0.98	1.11	0.96	1	0.86	13	3	24	26.7	0.0979347	1.045	0.94	0.899522	1.00906
3641.1	tr|Q9VN55|Q9VN55_DROME	Antimeros OS=Drosophila melanogaster GN=atms PE=2 SV=1	1.02	0.89	1.03	0.91	1.08	1.05	1.03	3	3	61	2.5	0.0979655	0.9625	1.05333	1.09437	1.00893
2615.1	tr|Q7K161|Q7K161_DROME	CG6805 OS=Drosophila melanogaster GN=CG6805 PE=2 SV=1	1.01	0.91	0.99	0.98	1.02	1.09	1.01	7	4	40	8.7	0.098085	0.9725	1.04	1.06941	1.0084
3556.1	sp|Q9Y123|RFT1_DROME	Protein RFT1 homolog OS=Drosophila melanogaster GN=CG3149 PE=2 SV=1	0.91	0.94	1.06	0.9	1.13	1.01	1.04	3	3	62	2.4	0.0983125	0.9525	1.06	1.11286	1.00739
2048.1	tr|Q9VUQ7|Q9VUQ7_DROME	CG7739 OS=Drosophila melanogaster GN=CG7739 PE=2 SV=1	1.04	0.94	0.98	0.92	1.03	1.06	1.02	11	4	67	8.2	0.0984169	0.97	1.03667	1.06873	1.00693
3817.1	tr|Q7KV93|Q7KV93_DROME	CG33231 OS=Drosophila melanogaster GN=CG33231 PE=2 SV=2	0.89	0.88	1.07	0.93	1.14	0.98	1.11	3	2	23	6.6	0.0984516	0.9425	1.07667	1.14235	1.00678
3859.1	tr|Q7K1C5|Q7K1C5_DROME	CG6406, isoform A OS=Drosophila melanogaster GN=CG6406 PE=2 SV=1	0.97	0.96	0.99	0.9	1.17	0.99	1.02	3	2	60	2.5	0.0990414	0.955	1.06	1.10995	1.00418
5027.1	tr|A1ZA77|A1ZA77_DROME	CG8320 OS=Drosophila melanogaster GN=CG8320-RA PE=2 SV=1	0.65	0.83	0.98	0.98	1.33	0.87	1.37	1	1	20	2.6	0.0990573	0.86	1.19	1.38372	1.00411
3285.1	tr|Q9W3G0|Q9W3G0_DROME	CG11190 OS=Drosophila melanogaster GN=CG11190 PE=2 SV=1	0.96	0.88	1.07	0.86	1.16	1.03	1.04	4	3	71	2.8	0.0991292	0.9425	1.07667	1.14235	1.0038
1123.1	sp|Q9VN93|CPR1_DROME	Putative cysteine proteinase CG12163 OS=Drosophila melanogaster GN=CG12163 PE=2 SV=2	0.99	0.92	1.04	0.89	1.09	1.07	1	25	12	69	18.1	0.099145	0.96	1.05333	1.09722	1.00373
1959.1	sp|P48554|RAC2_DROME	Ras-related protein Rac2 OS=Drosophila melanogaster GN=Rac2 PE=1 SV=1	1.04	0.89	1.01	0.85	1.13	1.02	1.06	12	2	21	28.1	0.0991768	0.9475	1.07	1.12929	1.00359
2767.1	sp|P25822|PUM_DROME	Maternal protein pumilio OS=Drosophila melanogaster GN=pum PE=1 SV=2	0.95	0.9	1.02	0.97	1.09	1.09	0.97	6	5	157	1.9	0.0992564	0.96	1.05	1.09375	1.00324
1490.1	tr|Q9VAS1|Q9VAS1_DROME	CG14523 OS=Drosophila melanogaster GN=CG14523 PE=2 SV=1	0.98	0.92	1.05	0.9	1.07	1.01	1.07	17	8	77	11	0.0993067	0.9625	1.05	1.09091	1.00302
3696.1	tr|E2QC83|E2QC83_DROME	Pabp2, isoform B OS=Drosophila melanogaster GN=Pabp2 PE=4 SV=1	0.79	0.89	1.02	1	1.19	0.96	1.15	3	3	25	6	0.0993067	0.925	1.1	1.18919	1.00302
1126.1	tr|Q7KUK9|Q7KUK9_DROME	CG17839, isoform B OS=Drosophila melanogaster GN=CG17839 PE=2 SV=2	0.94	0.94	1.01	0.96	1.08	1.09	0.96	25	11	178	7	0.0995201	0.9625	1.04333	1.08398	1.00209
1333.1	tr|Q8IRJ9|Q8IRJ9_DROME	Glycerol kinase, isoform B OS=Drosophila melanogaster GN=Gyk PE=2 SV=1	0.99	0.85	1.07	0.87	1.09	1.06	1.06	20	10	52	19.3	0.0996729	0.945	1.07	1.13228	1.00142
2401.1	tr|Q9W074|Q9W074_DROME	FI04779p OS=Drosophila melanogaster GN=HBS1 PE=2 SV=2	1.04	0.94	0.98	0.94	1.02	1.03	1.05	8	5	74	5.4	0.0997047	0.975	1.03333	1.05983	1.00128
3936.1	tr|Q9V9U0|Q9V9U0_DROME	CG2150 OS=Drosophila melanogaster GN=CG2150 PE=2 SV=1	1.16	0.96	0.97	1.15	0.9	0.93	0.95	3	1	17	8.6	0.0997886	1.06	0.926667	0.874214	1.00092
1927.1	sp|P82712|CCD1P_DROME	Probable cytochrome P450 12d1 proximal, mitochondrial OS=Drosophila melanogaster GN=Cyp12d1-p PE=2 SV=3	1.03	0.83	1.02	0.92	1.09	1.1	1.02	12	5	60	10	0.100009	0.95	1.07	1.12632	0.999963
228.1	tr|Q9VWD0|Q9VWD0_DROME	CG32528 OS=Drosophila melanogaster GN=CG32528 PE=2 SV=2	1.04	0.89	0.99	0.94	1.06	1.04	1.03	115	11	42	137.4	0.100134	0.965	1.04333	1.08117	0.999418
2278.1	sp|Q24020|FLII_DROME	Protein flightless-1 OS=Drosophila melanogaster GN=fliI PE=2 SV=1	0.96	0.88	1	0.92	1.23	1.05	0.97	9	5	144	3.1	0.10029	0.94	1.08333	1.15248	0.998741
1362.1	sp|P08645|RAS3_DROME	Ras-like protein 3 OS=Drosophila melanogaster GN=R PE=2 SV=2	0.97	0.91	1.03	0.93	0.99	1.04	1.13	20	4	21	48	0.100543	0.96	1.05333	1.09722	0.997646
2518.1	tr|Q8INQ9|Q8INQ9_DROME	AT21926p OS=Drosophila melanogaster GN=stck PE=2 SV=1	0.88	0.79	1.08	0.9	1.22	0.95	1.17	8	2	40	10	0.1006	0.9125	1.11333	1.22009	0.997401
847.1	tr|Q7K1W8|Q7K1W8_DROME	CG31650, isoform A OS=Drosophila melanogaster GN=CG9112 PE=2 SV=1	1.02	0.83	1.02	0.88	1.16	0.99	1.09	34	9	39	43.1	0.100627	0.9375	1.08	1.152	0.997286
1175.1	sp|Q9W4P5|VA0D1_DROME	V-type proton ATPase subunit d 1 OS=Drosophila melanogaster GN=VhaAC39-1 PE=1 SV=1	1	0.91	1.01	0.96	1.08	0.99	1.05	24	6	40	30.1	0.100699	0.97	1.04	1.07216	0.996976
1608.1	tr|Q9W3M8|Q9W3M8_DROME	LD34211p OS=Drosophila melanogaster GN=Ykt6 PE=2 SV=1	0.95	0.93	1.05	0.96	1.05	1.03	1.03	15	8	22	33.5	0.10074	0.9725	1.03667	1.06598	0.996799
1321.1	tr|A8DY69|A8DY69_DROME	CG8709, isoform B OS=Drosophila melanogaster GN=Lpin PE=2 SV=1	1.04	0.93	0.97	0.95	1.01	1.03	1.07	20	11	115	8.7	0.10074	0.9725	1.03667	1.06598	0.996799
3143.1	tr|Q9VE91|Q9VE91_DROME	GH26429p OS=Drosophila melanogaster GN=PKD PE=2 SV=4	1.04	0.93	0.96	0.91	1.01	1.12	1.02	5	2	94	2.7	0.10076	0.96	1.05	1.09375	0.996712
366.1	tr|Q9W373|Q9W373_DROME	CG12119 OS=Drosophila melanogaster GN=CG12119 PE=2 SV=1	1.01	0.91	1.02	0.92	1.05	1	1.09	80	13	56	71.4	0.1008	0.965	1.04667	1.08463	0.996539
2852.1	sp|Q9VE46|SC5A7_DROME	High-affinity choline transporter 1 OS=Drosophila melanogaster GN=CG7708 PE=2 SV=2	0.92	0.94	1.05	0.93	1.09	0.98	1.1	6	3	67	4.5	0.100917	0.96	1.05667	1.10069	0.996035
1748.1	sp|P40793|CDC42_DROME	Cdc42 homolog OS=Drosophila melanogaster GN=Cdc42 PE=1 SV=1	0.98	0.88	1.05	0.91	1.12	1.01	1.05	14	3	21	32.7	0.10125	0.955	1.06	1.10995	0.994603
4978.1	tr|Q9VRE2|Q9VRE2_DROME	BVES OS=Drosophila melanogaster GN=bves PE=2 SV=2	0.93	0.9	0.97	0.89	1.27	1.13	0.91	1	1	45	1.1	0.101324	0.9225	1.10333	1.19603	0.994288
2289.1	tr|A1ZBM2|A1ZBM2_DROME	CG11242 OS=Drosophila melanogaster GN=CG11242 PE=1 SV=1	0.98	0.83	1.06	0.93	1.09	1.07	1.04	9	4	27	16.7	0.101493	0.95	1.06667	1.12281	0.993564
929.1	sp|Q9VQ79|AIFM1_DROME	Putative apoptosis-inducing factor 1, mitochondrial OS=Drosophila melanogaster GN=AIF PE=2 SV=2	0.99	0.95	0.99	0.99	0.98	1.06	1.04	31	9	81	19.1	0.101939	0.98	1.02667	1.04762	0.991658
222.1	tr|Q9VT49|Q9VT49_DROME	CG14168 OS=Drosophila melanogaster GN=CG14168 PE=1 SV=1	0.97	0.92	1.02	0.96	1.09	1.05	0.98	116	18	81	71.3	0.102074	0.9675	1.04	1.07494	0.991086
2614.1	tr|Q9VQ37|Q9VQ37_DROME	CG18317 OS=Drosophila melanogaster GN=CG18317 PE=2 SV=2	1.09	1.04	0.98	1.02	1.01	0.96	0.91	7	4	40	8.7	0.102074	1.0325	0.96	0.929782	0.991086
1284.1	tr|Q9VLM9|Q9VLM9_DROME	CG17294 OS=Drosophila melanogaster GN=CG17294 PE=2 SV=1	0.99	0.9	1.02	0.99	1.04	1.03	1.04	21	7	28	37.5	0.102225	0.975	1.03667	1.06325	0.990444
4981.1	tr|Q9VF06|Q9VF06_DROME	CG4287, isoform A OS=Drosophila melanogaster GN=CG4287 PE=2 SV=1	0.83	0.82	0.99	1.01	1.32	0.99	1.05	1	1	38	1.3	0.10252	0.9125	1.12	1.2274	0.989191
1242.1	sp|P13678|KPC3_DROME	Protein kinase C OS=Drosophila melanogaster GN=Pkc98E PE=1 SV=1	0.92	0.92	1.06	0.96	1.02	1.05	1.07	22	8	71	15.5	0.102622	0.965	1.04667	1.08463	0.988758
3059.1	tr|Q7K2V9|Q7K2V9_DROME	CG33671 OS=Drosophila melanogaster GN=CG16804 PE=2 SV=1	0.98	0.9	1.04	0.95	1.01	1.04	1.09	5	3	42	5.9	0.103021	0.9675	1.04667	1.08183	0.987076
3353.1	tr|Q6NR46|Q6NR46_DROME	RE58623p OS=Drosophila melanogaster GN=Spt-I PE=2 SV=1	0.93	0.83	1.05	0.93	1.13	1.16	0.96	4	3	53	3.8	0.103092	0.935	1.08333	1.15865	0.986774
242.1	tr|Q9VLB7|Q9VLB7_DROME	GDP dissociation inhibitor OS=Drosophila melanogaster GN=Gdi PE=2 SV=1	1.01	0.93	1.02	0.95	1.05	1.04	1.01	110	22	50	110.3	0.103139	0.9775	1.03333	1.05712	0.986576
4255.1	tr|Q8SXR5|Q8SXR5_DROME	CG8366 OS=Drosophila melanogaster GN=CG8366 PE=2 SV=1	0.98	0.88	1.03	0.93	1.13	0.99	1.05	2	2	52	1.9	0.103219	0.955	1.05667	1.10646	0.986241
2197.1	tr|Q9VA41|Q9VA41_DROME	Niemann-Pick type C-2h, isoform A OS=Drosophila melanogaster GN=Npc2h PE=2 SV=1	0.94	0.88	1.02	0.99	1.07	1.12	0.98	10	2	18	28.5	0.103598	0.9575	1.05667	1.10357	0.984649
4009.1	tr|Q7JRC9|Q7JRC9_DROME	CG30496 OS=Drosophila melanogaster GN=CG30493;CG30496;l(2)08492 PE=2 SV=1	1.07	0.81	0.95	0.81	1.21	0.94	1.21	2	2	72	1.4	0.103728	0.91	1.12	1.23077	0.984103
5263.1	tr|A8JNV4|A8JNV4_DROME	CG34255 OS=Drosophila melanogaster GN=blos3 PE=4 SV=1	0.85	0.8	0.9	0.99	1.43	1.14	0.9	1	1	16	3.1	0.103927	0.885	1.15667	1.30697	0.983271
4382.1	tr|Q9VFK5|Q9VFK5_DROME	CG8538 OS=Drosophila melanogaster GN=CG8538 PE=2 SV=3	0.9	0.99	0.93	0.91	1.18	1.17	0.91	2	1	112	0.9	0.104011	0.9325	1.08667	1.16533	0.98292
1289.1	tr|Q9VB76|Q9VB76_DROME	CG6074 OS=Drosophila melanogaster GN=CG6074 PE=2 SV=2	0.91	0.94	1.02	0.98	1.08	1.1	0.97	21	6	35	30	0.104069	0.9625	1.05	1.09091	0.982679
5519.1	tr|O18353|O18353_DROME	CHIP OS=Drosophila melanogaster GN=Chi PE=2 SV=1	1.04	1.07	1.08	0.95	0.94	1	0.93	1	1	63	0.8	0.104093	1.035	0.956667	0.924316	0.982577
4045.1	tr|A1ZBA5|A1ZBA5_DROME	FI07234p OS=Drosophila melanogaster GN=mRpS28 PE=2 SV=1	0.87	1.16	1.15	1.11	0.88	0.97	0.86	2	2	21	4.7	0.105368	1.0725	0.903333	0.842269	0.977291
6.1	sp|P18432|MLR_DROME	Myosin regulatory light chain 2 OS=Drosophila melanogaster GN=Mlc2 PE=1 SV=2	0.96	0.92	1.03	0.99	1.03	1.01	1.07	2750	15	24	5801.5	0.105412	0.975	1.03667	1.06325	0.977111
1828.1	tr|Q9VM97|Q9VM97_DROME	Thrombospondin, isoform A OS=Drosophila melanogaster GN=Tsp PE=2 SV=2	1.01	0.87	1.04	0.88	1.12	1.02	1.05	13	5	118	5.5	0.105445	0.95	1.06333	1.1193	0.976975
4320.1	sp|P26016-2|FUR11_DROME	Isoform 1 of Furin-like protease 1, isoforms 1/1-X/2 OS=Drosophila melanogaster GN=Fur1	0.99	0.9	1.04	0.93	1.04	1.1	1.01	2	2	99	1	0.105445	0.965	1.05	1.08808	0.976975
2286.1	tr|Q7KTE7|Q7KTE7_DROME	Ca2+-channel-protein-beta-subunit, isoform G OS=Drosophila melanogaster GN=Ca-beta PE=2 SV=2	1.01	0.98	0.99	0.93	1	1.02	1.07	9	5	93	4.8	0.10565	0.9775	1.03	1.05371	0.976131
258.2	sp|Q27889|PP2B2_DROME	Serine/threonine-protein phosphatase 2B catalytic subunit 2 OS=Drosophila melanogaster GN=Pp2B-14D PE=1 SV=2	0.99	0.96	1.02	0.97	1.04	1.01	1.01	101	18	63	80.1	0.10565	0.985	1.02	1.03553	0.976131
2865.1	tr|Q9XZ03|Q9XZ03_DROME	Multiprotein Bridging Factor 1 OS=Drosophila melanogaster GN=mbf1 PE=2 SV=1	0.96	0.94	0.99	0.99	1.12	1.03	0.98	6	3	16	18.7	0.105803	0.97	1.04333	1.0756	0.975503
2435.1	sp|P49071|MAPK2_DROME	MAP kinase-activated protein kinase 2 OS=Drosophila melanogaster GN=MAPk-Ak2 PE=1 SV=1	0.91	0.94	1.06	0.92	1.12	1	1.05	8	5	41	9.7	0.106059	0.9575	1.05667	1.10357	0.974451
1053.1	tr|A1Z7Y7|A1Z7Y7_DROME	CG42347, isoform C OS=Drosophila melanogaster GN=CG42347 PE=4 SV=2	0.95	0.9	1.05	0.96	1.07	1.01	1.05	27	14	98	13.8	0.106065	0.965	1.04333	1.08117	0.974427
2090.1	tr|Q9VKJ6|Q9VKJ6_DROME	CG6230 OS=Drosophila melanogaster GN=CG6230-RA PE=2 SV=1	1.06	0.87	0.97	0.94	1.07	1.02	1.08	10	7	136	3.7	0.106107	0.96	1.05667	1.10069	0.974255
2229.1	tr|A1Z8W8|A1Z8W8_DROME	Gartenzwerg, isoform B OS=Drosophila melanogaster GN=garz PE=4 SV=1	0.95	0.92	1.02	0.95	1.12	1.08	0.96	9	7	220	2	0.106112	0.96	1.05333	1.09722	0.974234
407.1	sp|P12370|KAPC_DROME	cAMP-dependent protein kinase catalytic subunit OS=Drosophila melanogaster GN=Pka-C1 PE=1 SV=3	0.96	0.89	1.05	0.96	1.08	1.02	1.04	73	10	41	89.4	0.106254	0.965	1.04667	1.08463	0.973656
1897.1	tr|Q9W1K4|Q9W1K4_DROME	Egalitarian OS=Drosophila melanogaster GN=egl PE=2 SV=4	1	0.93	0.96	0.98	1.03	1.12	0.98	12	6	112	5.3	0.10635	0.9675	1.04333	1.07838	0.973262
1439.1	tr|Q9W095|Q9W095_DROME	CG7995, isoform A OS=Drosophila melanogaster GN=CG7995-RA PE=2 SV=2	0.96	0.83	1.05	0.93	0.98	1.11	1.13	18	10	65	13.9	0.106404	0.9425	1.07333	1.13882	0.973043
174.1	sp|P91927|A60DA_DROME	LETM1 and EF-hand domain-containing protein anon-60Da, mitochondrial OS=Drosophila melanogaster GN=anon-60Da PE=2 SV=2	0.96	0.92	1.05	0.95	1.05	1.02	1.04	157	36	114	69.2	0.106611	0.97	1.03667	1.06873	0.972196
767.1	sp|Q9VL78|FKB59_DROME	FK506-binding protein 59 OS=Drosophila melanogaster GN=FKBP59 PE=1 SV=1	0.96	0.92	1.05	0.95	1.05	1.04	1.02	38	15	49	39	0.106611	0.97	1.03667	1.06873	0.972196
4893.1	sp|Q9V998|UBL5_DROME	Ubiquitin-like protein 5 OS=Drosophila melanogaster GN=ubl PE=3 SV=1	0.89	0.83	1.04	0.88	1.34	1.07	0.96	1	1	9	5.8	0.106654	0.91	1.12333	1.23443	0.972024
4315.1	tr|Q9VM47|Q9VM47_DROME	Menin 1, isoform A OS=Drosophila melanogaster GN=Mnn1 PE=4 SV=3	1.04	0.92	0.98	0.88	1.01	1.03	1.13	2	2	83	1.2	0.106731	0.955	1.05667	1.10646	0.971709
3257.1	tr|A8JNN5|A8JNN5_DROME	CG7112, isoform B OS=Drosophila melanogaster GN=CG7112 PE=4 SV=1	1	0.84	1.02	0.96	1.06	1.11	1.01	4	4	133	1.5	0.106746	0.955	1.06	1.10995	0.97165
1038.1	sp|P48603|CAPZB_DROME	F-actin-capping protein subunit beta OS=Drosophila melanogaster GN=cpb PE=1 SV=1	0.96	0.94	1.03	0.98	1	1.03	1.07	28	7	31	44.7	0.10702	0.9775	1.03333	1.05712	0.970534
5394.1	tr|Q9I7S4|Q9I7S4_DROME	CG42629 OS=Drosophila melanogaster GN=CG42629 PE=1 SV=4	0.79	0.88	1.09	0.96	1.01	1.12	1.15	1	1	134	0.4	0.107159	0.93	1.09333	1.17563	0.969972
4021.1	tr|Q9VFG0|Q9VFG0_DROME	CG14857 OS=Drosophila melanogaster GN=CG14857 PE=2 SV=1	1.03	0.91	0.89	1	1.13	1.02	1.02	2	2	62	1.6	0.107287	0.9575	1.05667	1.10357	0.969453
2213.1	tr|Q9VF39|Q9VF39_DROME	CG9590 OS=Drosophila melanogaster GN=CG9590 PE=2 SV=1	0.99	0.85	1.05	0.9	1.15	1.07	1	9	7	51	8.9	0.107336	0.9475	1.07333	1.13281	0.969255
2822.1	tr|Q9W0T7|Q9W0T7_DROME	CG16940, isoform A OS=Drosophila melanogaster GN=CG16940 PE=2 SV=2	1.02	0.96	0.95	0.99	1.06	1	1.02	6	4	117	2.6	0.107498	0.98	1.02667	1.04762	0.9686
4687.1	tr|Q9VJ41|Q9VJ41_DROME	CG33120 OS=Drosophila melanogaster GN=CG10599 PE=2 SV=2	0.99	0.97	0.99	0.97	0.99	1.01	1.08	1	1	80	0.6	0.107498	0.98	1.02667	1.04762	0.9686
5594.1	tr|A1Z9L2|A1Z9L2_DROME	Reduction in Cnn dots 1, isoform C OS=Drosophila melanogaster GN=Rcd1 PE=4 SV=1	0.86	0.98	0.94	1.03	1.04	1	1.14	1	1	101	0.5	0.10776	0.9525	1.06	1.11286	0.967541
4902.1	tr|Q9W403|Q9W403_DROME	CG3847 OS=Drosophila melanogaster GN=CG3847 PE=2 SV=1	0.76	0.62	1.1	0.97	1.41	0.98	1.16	1	1	44	1.1	0.1078	0.8625	1.18333	1.37198	0.967382
3992.1	tr|Q9VPM7|Q9VPM7_DROME	CG17078 OS=Drosophila melanogaster GN=CG17078-RA PE=2 SV=2	1.03	0.96	1.12	1.03	0.94	0.95	0.98	2	2	67	1.5	0.108031	1.035	0.956667	0.924316	0.96645
2701.1	tr|Q9VL69|Q9VL69_DROME	CG5885 OS=Drosophila melanogaster GN=BEST:CK01296 PE=2 SV=1	0.88	0.88	1.06	0.97	1.15	1	1.06	7	2	22	16.2	0.108063	0.9475	1.07	1.12929	0.966325
4220.1	tr|Q9W148|Q9W148_DROME	LD15123p OS=Drosophila melanogaster GN=uri PE=2 SV=1	0.84	0.88	0.99	1.07	1.03	1.12	1.07	2	2	84	1.2	0.108092	0.945	1.07333	1.1358	0.966205
2255.1	tr|A8JUQ9|A8JUQ9_DROME	Vav, isoform C OS=Drosophila melanogaster GN=vav PE=4 SV=1	1	0.92	1	0.95	1.1	1	1.01	9	6	114	4	0.108138	0.9675	1.03667	1.07149	0.966021
3298.1	sp|Q9VBX1|NEMF_DROME	Nuclear export mediator factor NEMF homolog OS=Drosophila melanogaster GN=Clbn PE=1 SV=2	0.98	1	0.99	0.9	1.11	1.01	1.01	4	3	113	1.8	0.108447	0.9675	1.04333	1.07838	0.964781
155.1	sp|P29742|CLH_DROME	Clathrin heavy chain OS=Drosophila melanogaster GN=Chc PE=1 SV=1	0.99	0.93	1.02	0.96	1.08	1.04	0.99	178	41	191	46.6	0.108585	0.975	1.03667	1.06325	0.964231
3231.1	tr|Q9V3F3|Q9V3F3_DROME	AT17625p OS=Drosophila melanogaster GN=mTTF PE=2 SV=1	0.97	1.01	0.97	0.88	1.14	0.97	1.07	4	4	48	4.1	0.108626	0.9575	1.06	1.10705	0.964067
5369.1	tr|Q9VB72|Q9VB72_DROME	CG5882 OS=Drosophila melanogaster GN=CG5882 PE=2 SV=1	0.93	0.93	0.92	0.87	1.07	1.35	0.93	1	1	101	0.5	0.10864	0.9125	1.11667	1.22374	0.964009
3126.1	sp|Q8SYS7|NARF_DROME	Probable cytosolic Fe-S cluster assembly factor CG17683 OS=Drosophila melanogaster GN=CG17683 PE=2 SV=1	1.01	0.93	0.98	0.95	1	1.13	1.01	5	3	55	4.6	0.108805	0.9675	1.04667	1.08183	0.963351
1881.1	tr|Q9VBQ5|Q9VBQ5_DROME	CG5112 OS=Drosophila melanogaster GN=CG5112 PE=2 SV=1	1	0.9	1.01	0.96	1.08	1.08	0.98	12	7	58	10.3	0.108805	0.9675	1.04667	1.08183	0.963351
4610.1	sp|Q9W1F4|THOC5_DROME	THO complex subunit 5 OS=Drosophila melanogaster GN=thoc5 PE=1 SV=2	0.77	0.99	0.9	1.02	1.05	1.27	1	1	1	71	0.7	0.109571	0.92	1.10667	1.2029	0.960305
3427.1	tr|Q9VRQ1|Q9VRQ1_DROME	CG5537 OS=Drosophila melanogaster GN=CG5537 PE=2 SV=1	0.96	0.98	1	0.98	1.07	0.99	1.01	4	2	29	7	0.109755	0.98	1.02333	1.04422	0.959577
3294.1	sp|Q9VQZ6|ELP3_DROME	Probable elongator complex protein 3 OS=Drosophila melanogaster GN=Elp3 PE=2 SV=1	0.97	0.89	1.07	0.9	1.02	1.1	1.06	4	3	63	3.2	0.109771	0.9575	1.06	1.10705	0.959514
4428.1	tr|Q9VBU4|Q9VBU4_DROME	CG11858 OS=Drosophila melanogaster GN=CG11858 PE=2 SV=1	1.34	0.93	1.1	0.99	0.82	0.92	0.89	2	1	14	7.2	0.10983	1.09	0.876667	0.804281	0.959281
939.1	tr|A8DRW0|A8DRW0_DROME	Cuticular protein 49Aa OS=Drosophila melanogaster GN=Cpr49Aa PE=4 SV=1	0.96	0.93	0.91	1.04	0.97	1.11	1.09	31	4	16	99.4	0.109975	0.96	1.05667	1.10069	0.958705
2570.1	tr|Q8ING0|Q8ING0_DROME	CG31326 OS=Drosophila melanogaster GN=CG31326 PE=2 SV=1	1.08	0.89	0.96	0.81	1.18	1.04	1.04	7	5	57	6.1	0.110016	0.935	1.08667	1.16221	0.958545
4538.1	tr|Q9W2P5|Q9W2P5_DROME	CG9344 OS=Drosophila melanogaster GN=CG9344 PE=2 SV=1	1.02	0.82	1.06	0.88	1.06	1.1	1.07	2	1	9	11.1	0.110363	0.945	1.07667	1.13933	0.957175
2935.1	tr|Q9VMZ9|Q9VMZ9_DROME	CG1092, isoform A OS=Drosophila melanogaster GN=CG1092 PE=2 SV=4	0.96	0.9	0.99	1	0.97	1.12	1.06	6	2	45	6.7	0.110371	0.9625	1.05	1.09091	0.957146
1700.1	tr|Q9VH17|Q9VH17_DROME	CG12814, isoform A OS=Drosophila melanogaster GN=CG12814 PE=2 SV=3	0.97	0.85	1.07	0.89	1.11	1	1.1	14	8	44	16.1	0.110512	0.945	1.07	1.13228	0.956591
4742.1	tr|Q6NPB2|Q6NPB2_DROME	CG8317 OS=Drosophila melanogaster GN=CG8317 PE=2 SV=1	0.87	1.34	1.01	1.3	0.98	0.85	0.65	1	1	16	3	0.110538	1.13	0.826667	0.731563	0.95649
3288.1	sp|Q9I7K6|NASP_DROME	Protein NASP homolog OS=Drosophila melanogaster GN=CG8223 PE=1 SV=1	0.94	1.04	0.91	0.99	1.02	1.07	1.03	4	3	52	3.9	0.110567	0.97	1.04	1.07216	0.956376
3029.1	sp|Q9V726-2|CPSF1_DROME	Isoform B of Cleavage and polyadenylation specificity factor subunit 1 OS=Drosophila melanogaster GN=Cpsf160	0.97	0.99	0.96	0.99	1.08	1.05	0.97	5	4	161	1.6	0.11088	0.9775	1.03333	1.05712	0.955148
3266.1	tr|E1JGX3|E1JGX3_DROME	Nipped-B, isoform G OS=Drosophila melanogaster GN=Nipped-B PE=4 SV=1	0.99	0.99	1.02	0.94	1.02	1.03	1.02	4	4	234	0.9	0.110891	0.985	1.02333	1.03892	0.955105
2027.1	sp|Q9XZL8|SRA_DROME	Protein sarah OS=Drosophila melanogaster GN=sra PE=1 SV=1	0.98	0.94	1.05	0.87	1.11	1.04	1.02	11	5	31	17.5	0.111259	0.96	1.05667	1.10069	0.953663
384.1	tr|Q9VDZ7|Q9VDZ7_DROME	CG11779, isoform A OS=Drosophila melanogaster GN=CG11779 PE=2 SV=1	1.03	0.97	1.09	1.02	1	0.96	0.92	76	19	53	71.9	0.111366	1.0275	0.96	0.934307	0.953248
5182.1	sp|Q94526|ORK1_DROME	Open rectifier potassium channel protein 1 OS=Drosophila melanogaster GN=Ork1 PE=1 SV=2	1.05	0.9	0.94	0.97	1.04	1.09	1.01	1	1	109	0.5	0.111665	0.965	1.04667	1.08463	0.952081
1719.1	tr|Q8SY53|Q8SY53_DROME	CG7830 OS=Drosophila melanogaster GN=CG7830 PE=2 SV=1	0.99	0.88	1.05	0.93	1.07	1.02	1.06	14	6	37	18.9	0.111937	0.9625	1.05	1.09091	0.951027
5195.1	tr|Q9VY97|Q9VY97_DROME	Mutagen-sensitive 101 OS=Drosophila melanogaster GN=mus101 PE=2 SV=1	0.8	0.83	1	1.02	0.95	1.28	1.11	1	1	158	0.3	0.111978	0.9125	1.11333	1.22009	0.950868
2373.1	sp|Q9XYZ5|DDB1_DROME	DNA damage-binding protein 1 OS=Drosophila melanogaster GN=pic PE=1 SV=1	0.97	0.91	1.04	0.96	1.02	1.02	1.07	8	6	126	3.2	0.112022	0.97	1.03667	1.06873	0.950695
2254.1	sp|P08510-3|KCNAS_DROME	Isoform Beta of Potassium voltage-gated channel protein Shaker OS=Drosophila melanogaster GN=Sh	0.96	0.93	0.97	1.02	1.04	1.09	0.98	9	6	72	6.2	0.112022	0.97	1.03667	1.06873	0.950695
2380.1	tr|Q9VX26|Q9VX26_DROME	CG32556, isoform A OS=Drosophila melanogaster GN=CG32556 PE=1 SV=2	0.95	0.9	1.05	0.96	1.1	1	1.05	8	6	153	2.6	0.112107	0.965	1.05	1.08808	0.950366
4110.1	tr|Q9VUE5|Q9VUE5_DROME	LD17962p OS=Drosophila melanogaster GN=stwl PE=2 SV=1	1.03	0.81	0.94	0.89	1.25	1.15	0.92	2	2	113	0.9	0.112157	0.9175	1.10667	1.20618	0.950173
1027.1	sp|Q9VMQ7|ELP4_DROME	Putative elongator complex protein 4 OS=Drosophila melanogaster GN=CG6907 PE=1 SV=1	0.93	0.93	1.05	0.97	1.07	1.06	1	28	9	49	28.8	0.112512	0.97	1.04333	1.0756	0.948801
1759.1	sp|Q9W334|RS28_DROME	40S ribosomal protein S28 OS=Drosophila melanogaster GN=RpS28b PE=3 SV=2	0.97	1.05	1.06	1.13	0.94	1.03	0.83	14	2	7	93.7	0.112604	1.0525	0.933333	0.886778	0.948446
3430.1	tr|Q9VNI4|Q9VNI4_DROME	CG2046 OS=Drosophila melanogaster GN=CG2046 PE=2 SV=1	1.02	0.86	1.02	0.89	1.12	0.98	1.1	4	2	26	7.8	0.112604	0.9475	1.06667	1.12577	0.948446
1375.1	tr|Q9W290|Q9W290_DROME	GM130, isoform B OS=Drosophila melanogaster GN=GM130 PE=1 SV=2	0.9	0.96	1.04	0.97	1.09	1.03	1.01	19	12	87	10.9	0.112621	0.9675	1.04333	1.07838	0.948379
2248.1	tr|Q9VVK7|Q9VVK7_DROME	NUCB1 OS=Drosophila melanogaster GN=NUCB1 PE=1 SV=3	0.91	0.97	0.99	0.97	1.01	1.15	0.99	9	6	67	6.7	0.11268	0.96	1.05	1.09375	0.948154
209.1	sp|Q9VJE5-3|CL190_DROME	Isoform C of Restin homolog OS=Drosophila melanogaster GN=CLIP-190	0.97	0.91	1.06	0.9	1.04	1.02	1.09	127	41	186	34.1	0.11268	0.96	1.05	1.09375	0.948154
823.1	tr|Q7K0B6|Q7K0B6_DROME	CG30000 OS=Drosophila melanogaster GN=CG30000 PE=2 SV=1	1.02	0.93	1.01	0.92	1.04	1	1.08	35	10	27	65.9	0.113011	0.97	1.04	1.07216	0.946878
4638.1	tr|Q9VEP0|Q9VEP0_DROME	CG3995 OS=Drosophila melanogaster GN=CG3995 PE=1 SV=1	1.08	0.92	0.93	0.9	1.09	1.02	1.06	1	1	37	1.3	0.113391	0.9575	1.05667	1.10357	0.945421
2126.1	tr|Q9VG51|Q9VG51_DROME	CG6359 OS=Drosophila melanogaster GN=CG6359 PE=2 SV=1	1.01	0.94	1.02	0.86	1.12	1.04	1.01	10	6	19	25.7	0.113391	0.9575	1.05667	1.10357	0.945421
1967.1	sp|Q9VX32-2|RG190_DROME	Isoform 2 of Rho GTPase-activating protein 190 OS=Drosophila melanogaster GN=RhoGAPp190	0.96	0.91	1.07	0.91	1.05	1.07	1.03	11	9	179	3.1	0.113499	0.9625	1.05	1.09091	0.945008
3489.1	sp|Q24523|BUN2_DROME	Protein bunched, class 2/F isoform OS=Drosophila melanogaster GN=bun PE=1 SV=3	0.99	0.8	1.07	0.89	1.13	1.01	1.11	4	2	125	1.6	0.113749	0.9375	1.08333	1.15556	0.944054
4173.1	tr|O76928|O76928_DROME	Carmine OS=Drosophila melanogaster GN=cm PE=2 SV=1	0.92	0.94	1.07	0.88	1.13	1	1.06	2	2	47	2.1	0.113801	0.9525	1.06333	1.11636	0.943852
3066.1	tr|Q9VVJ7|Q9VVJ7_DROME	CG7484 OS=Drosophila melanogaster GN=CG7484 PE=1 SV=2	0.89	0.94	1.05	0.96	0.99	1.09	1.07	5	3	20	12.6	0.114155	0.96	1.05	1.09375	0.942506
5388.1	sp|Q9VKJ7|GR32A_DROME	Putative gustatory receptor 32a OS=Drosophila melanogaster GN=Gr32a PE=2 SV=3	0.96	0.9	1	0.98	0.96	1.07	1.12	1	1	53	0.9	0.114155	0.96	1.05	1.09375	0.942506
1110.1	tr|Q9VLW1|Q9VLW1_DROME	Lectin-28C OS=Drosophila melanogaster GN=lectin-28C PE=2 SV=1	0.97	0.9	1.07	0.85	1.03	1.04	1.13	26	5	26	50.1	0.114287	0.9475	1.06667	1.12577	0.942004
544.1	tr|Q0E8X7|Q0E8X7_DROME	CG30415, isoform A OS=Drosophila melanogaster GN=CG30415 PE=2 SV=1	0.93	0.88	1.08	0.93	1.11	1.01	1.07	55	5	10	288.4	0.114345	0.955	1.06333	1.11344	0.941781
2928.1	tr|Q8IND1|Q8IND1_DROME	Arpc3A, isoform D OS=Drosophila melanogaster GN=Arpc3A PE=2 SV=2	0.96	0.85	1.06	0.95	1.11	1.04	1.03	6	2	18	16.4	0.114365	0.955	1.06	1.10995	0.941706
5760.1	sp|P11929|BSG2_DROME	Blastoderm-specific protein 25D OS=Drosophila melanogaster GN=Bsg25D PE=1 SV=2	0.95	0.87	1	1	1.07	0.97	1.14	1	1	84	0.6	0.114365	0.955	1.06	1.10995	0.941706
1785.1	tr|A4V3N7|A4V3N7_DROME	Ceramidase, isoform B OS=Drosophila melanogaster GN=CDase PE=4 SV=1	0.93	0.91	1.06	0.93	1.09	0.98	1.1	13	8	78	8.3	0.114605	0.9575	1.05667	1.10357	0.940797
2098.1	sp|P07668|CLAT_DROME	Choline O-acetyltransferase OS=Drosophila melanogaster GN=Cha PE=1 SV=3	0.97	0.9	1.02	0.98	1.07	0.98	1.08	10	7	81	6.2	0.114698	0.9675	1.04333	1.07838	0.940444
577.1	sp|O61491|FLOT1_DROME	Flotillin-1 OS=Drosophila melanogaster GN=Flo PE=2 SV=1	1.01	0.91	1.01	0.95	1.06	1.06	0.99	51	11	47	54.1	0.114711	0.97	1.03667	1.06873	0.940396
177.1	sp|P08928|LAM0_DROME	Lamin Dm0 OS=Drosophila melanogaster GN=Lam PE=1 SV=4	0.98	0.91	1.01	0.98	1.1	1.05	0.98	154	33	71	108.1	0.114733	0.97	1.04333	1.0756	0.940312
3247.1	tr|Q9VDE8|Q9VDE8_DROME	CG7044 OS=Drosophila melanogaster GN=CG7044-RA PE=2 SV=1	1.1	0.87	0.93	0.9	1.06	1.06	1.08	4	4	113	1.8	0.114765	0.95	1.06667	1.12281	0.940189
3987.1	tr|A4V408|A4V408_DROME	CG3774, isoform B OS=Drosophila melanogaster GN=Efr PE=4 SV=1	0.85	0.93	1.06	0.97	1.09	1	1.1	3	1	39	3.8	0.114773	0.9525	1.06333	1.11636	0.940162
638.1	tr|Q6NLA3|Q6NLA3_DROME	RE25460p OS=Drosophila melanogaster GN=Vha100-1 PE=2 SV=1	0.94	0.95	1.02	0.99	1.06	1.07	0.98	46	13	97	23.8	0.114885	0.975	1.03667	1.06325	0.939737
3358.1	tr|Q9VDH3|Q9VDH3_DROME	CG10830 OS=Drosophila melanogaster GN=CG10830 PE=2 SV=1	1.15	1.02	1.04	1.03	1.07	0.83	0.87	4	3	26	7.7	0.114967	1.06	0.923333	0.871069	0.939425
183.1	sp|Q9W391|KPBA_DROME	Probable phosphorylase b kinase regulatory subunit alpha OS=Drosophila melanogaster GN=CG7766 PE=1 SV=2	1	0.91	1.01	0.94	1.09	1.08	0.97	150	26	140	53.4	0.115248	0.965	1.04667	1.08463	0.938368
952.1	tr|Q9W2L6|Q9W2L6_DROME	CG9394 OS=Drosophila melanogaster GN=CG9394 PE=2 SV=1	0.95	0.94	1.06	0.91	1.02	1.03	1.09	30	11	77	19.6	0.115248	0.965	1.04667	1.08463	0.938368
2621.1	tr|Q9VVW7|Q9VVW7_DROME	CG11577 OS=Drosophila melanogaster GN=CG11577 PE=1 SV=2	0.85	0.95	0.96	1.02	0.95	1.11	1.16	7	4	26	13.7	0.115366	0.945	1.07333	1.1358	0.937923
550.1	tr|Q9VLY7|Q9VLY7_DROME	GH05679p OS=Drosophila melanogaster GN=TepIII PE=2 SV=2	1.01	0.96	0.99	0.93	1.09	1.04	0.98	53	18	164	16.2	0.115366	0.9725	1.03667	1.06598	0.937923
3484.1	sp|Q9VSB9|TMM43_DROME	Transmembrane protein 43 homolog OS=Drosophila melanogaster GN=CG8111 PE=1 SV=1	1.04	1.08	1.06	0.94	0.96	0.96	0.96	4	2	43	4.7	0.115446	1.03	0.96	0.932039	0.937621
3555.1	tr|Q9VEA2|Q9VEA2_DROME	CG7146 OS=Drosophila melanogaster GN=CG7146 PE=2 SV=1	1.07	1.01	1.08	1.02	0.98	1.02	0.82	3	3	100	1.5	0.115446	1.045	0.94	0.899522	0.937621
1552.1	tr|Q8IMW9|Q8IMW9_DROME	CG6454, isoform C OS=Drosophila melanogaster GN=CG6454 PE=2 SV=2	0.89	0.94	0.99	1.03	0.99	1.05	1.12	16	9	172	4.7	0.115514	0.9625	1.05333	1.09437	0.937365
1830.1	tr|Q9W266|Q9W266_DROME	Transmembrane protein windpipe OS=Drosophila melanogaster GN=wdp PE=2 SV=1	1	0.85	1.04	0.9	1.07	0.99	1.16	13	4	75	8.7	0.115661	0.9475	1.07333	1.13281	0.936815
1625.1	tr|Q9VRU1|Q9VRU1_DROME	CG10467 OS=Drosophila melanogaster GN=CG10467-RA PE=2 SV=1	0.95	0.9	1.09	0.84	1.12	1.02	1.08	15	7	40	18.9	0.116088	0.945	1.07333	1.1358	0.935211
5060.1	tr|Q9V9T9|Q9V9T9_DROME	CG2135 OS=Drosophila melanogaster GN=CG2135 PE=2 SV=1	0.94	0.75	1.14	0.8	1.25	1.06	1.07	1	1	79	0.6	0.116225	0.9075	1.12667	1.24151	0.934702
1993.1	tr|Q9VKD9|Q9VKD9_DROME	CG16965 OS=Drosophila melanogaster GN=CG16965 PE=2 SV=1	1.03	0.88	1.02	0.87	1.06	1	1.14	11	7	78	7	0.116514	0.95	1.06667	1.12281	0.933621
5549.1	tr|E2QD98|E2QD98_DROME	Stardust, isoform G OS=Drosophila melanogaster GN=sdt PE=4 SV=1	1.01	0.9	0.92	1	1.16	0.99	1.03	1	1	218	0.2	0.116596	0.9575	1.06	1.10705	0.933318
4505.1	tr|Q9VBF5|Q9VBF5_DROME	CG5432 OS=Drosophila melanogaster GN=CG5432 PE=2 SV=2	0.83	0.82	1.1	0.98	1.08	1.13	1.05	2	1	40	2.5	0.116637	0.9325	1.08667	1.16533	0.933162
4903.1	tr|Q9VR36|Q9VR36_DROME	CG11927 OS=Drosophila melanogaster GN=CG11927 PE=2 SV=1	0.8	0.85	1.14	0.86	1.2	1.17	0.98	1	1	54	0.9	0.116675	0.9125	1.11667	1.22374	0.933023
5390.1	tr|Q9VIZ9|Q9VIZ9_DROME	Alpha methyl dopa-resistant, isoform B OS=Drosophila melanogaster GN=amd PE=2 SV=2	1.14	0.91	1.21	1.04	1.02	0.86	0.82	1	1	57	0.9	0.116999	1.075	0.9	0.837209	0.931817
3541.1	tr|Q9VIQ4|Q9VIQ4_DROME	GH03980p OS=Drosophila melanogaster GN=Hf PE=2 SV=1	1.12	0.96	1.12	1.02	1.04	0.9	0.83	3	3	24	6.2	0.11725	1.055	0.923333	0.875197	0.930888
3405.1	tr|Q8MLT4|Q8MLT4_DROME	Gp150, isoform D OS=Drosophila melanogaster GN=Gp150 PE=1 SV=1	0.96	0.99	0.92	1.03	1.05	1.05	1	4	3	121	1.6	0.117387	0.975	1.03333	1.05983	0.930381
1923.1	tr|Q9VM94|Q9VM94_DROME	Homer, isoform B OS=Drosophila melanogaster GN=homer PE=2 SV=1	0.97	0.92	0.99	1.02	0.99	1.06	1.05	12	5	43	14	0.117387	0.975	1.03333	1.05983	0.930381
2208.1	sp|Q9V4C8|HCF_DROME	Host cell factor OS=Drosophila melanogaster GN=Hcf PE=1 SV=2	0.91	0.9	1.03	0.98	1.16	1	1.02	9	9	160	2.8	0.117602	0.955	1.06	1.10995	0.929585
1111.1	tr|Q9W4K0|Q9W4K0_DROME	CHOp24 OS=Drosophila melanogaster GN=CHOp24 PE=2 SV=1	0.98	0.88	1.06	0.89	1.14	1	1.06	26	5	23	55.9	0.11766	0.9525	1.06667	1.11986	0.929372
1679.1	tr|Q9VH03|Q9VH03_DROME	CG11872 OS=Drosophila melanogaster GN=CG11872 PE=2 SV=1	0.94	0.91	1.06	0.93	1.1	1.02	1.02	14	10	156	4.5	0.117703	0.96	1.04667	1.09028	0.929214
1619.1	tr|Q9V393|Q9V393_DROME	Kurtz OS=Drosophila melanogaster GN=krz PE=2 SV=1	1.04	0.9	1	0.94	1.05	1.03	1.04	15	7	51	14.7	0.117871	0.97	1.04	1.07216	0.928593
300.1	tr|Q7K511|Q7K511_DROME	CG3835, isoform A OS=Drosophila melanogaster GN=EG:87B1.3 PE=2 SV=1	0.99	0.92	1.04	0.93	1.02	1.02	1.08	94	16	58	80.6	0.117871	0.97	1.04	1.07216	0.928593
1991.1	tr|Q7JYK2|Q7JYK2_DROME	CG1941 OS=Drosophila melanogaster GN=CG1941 PE=2 SV=1	1.04	0.92	1.02	0.85	1.05	1.06	1.06	11	7	40	13.7	0.118231	0.9575	1.05667	1.10357	0.927269
4.1	tr|D1YSG0|D1YSG0_DROME	Bent, isoform F OS=Drosophila melanogaster GN=bt PE=4 SV=1	0.97	0.94	1.03	0.98	1.04	1.04	1	3544	342	999	177.3	0.118476	0.98	1.02667	1.04762	0.926371
5106.1	tr|Q9W2Z7|Q9W2Z7_DROME	CG32694, isoform B OS=Drosophila melanogaster GN=CG32694 PE=1 SV=2	0.95	0.86	0.95	1.04	1.08	1.14	0.97	1	1	38	1.3	0.118494	0.95	1.06333	1.1193	0.926302
2735.1	tr|Q9VQZ1|Q9VQZ1_DROME	Lethal (2) k05819, isoform A OS=Drosophila melanogaster GN=l(2)k05819 PE=2 SV=3	0.94	0.94	1.06	0.82	1.21	1.01	1.04	6	6	162	1.9	0.118599	0.94	1.08667	1.15603	0.925919
4145.1	tr|Q8SXG7|Q8SXG7_DROME	CG15440 OS=Drosophila melanogaster GN=CG15440 PE=2 SV=1	1.01	0.95	1.02	0.93	1.05	1.01	1.03	2	2	37	2.7	0.118677	0.9775	1.03	1.05371	0.925634
979.1	tr|Q9VCU1|Q9VCU1_DROME	CG4721 OS=Drosophila melanogaster GN=CG4721-RA PE=2 SV=2	0.98	0.87	1.04	0.97	1.05	1.02	1.07	29	15	81	18	0.118808	0.965	1.04667	1.08463	0.925153
1452.1	tr|Q9VII9|Q9VII9_DROME	CG31673 OS=Drosophila melanogaster GN=CG31673 PE=2 SV=2	0.94	0.92	1.05	0.95	0.99	1.05	1.1	18	6	36	25.3	0.118808	0.965	1.04667	1.08463	0.925153
3112.1	tr|Q8IQM5|Q8IQM5_DROME	Ubiquitin carrier protein OS=Drosophila melanogaster GN=CG7656 PE=2 SV=1	1	0.88	1.03	0.96	1.07	1.04	1.02	5	3	35	7.2	0.118829	0.9675	1.04333	1.07838	0.925076
3352.1	tr|Q7K2Q8|Q7K2Q8_DROME	CG10153 OS=Drosophila melanogaster GN=CG10153 PE=2 SV=1	0.99	0.97	1.01	0.97	1.06	1.02	0.99	4	3	22	9	0.119	0.985	1.02333	1.03892	0.924455
2304.1	tr|Q9VTB0|Q9VTB0_DROME	CG8003 OS=Drosophila melanogaster GN=CG8003 PE=2 SV=1	1.08	1.1	1.22	0.95	1.06	0.89	0.71	9	4	46	9.8	0.119061	1.0875	0.886667	0.815326	0.924229
3383.1	tr|O76876|O76876_DROME	CG3056, isoform A OS=Drosophila melanogaster GN=EG:132E8.1 PE=2 SV=1	0.97	0.77	1.04	0.98	1.14	1.07	1.03	4	3	53	3.8	0.119079	0.94	1.08	1.14894	0.924163
4291.1	sp|P40791|MEF2_DROME	Myocyte-specific enhancer factor 2 OS=Drosophila melanogaster GN=Mef2 PE=1 SV=2	0.86	0.88	1.11	0.87	1.06	1.22	1.01	2	2	57	1.8	0.119093	0.93	1.09667	1.17921	0.924114
2180.1	tr|Q7JVZ8|Q7JVZ8_DROME	CG5224 OS=Drosophila melanogaster GN=CG5224 PE=2 SV=1	1.05	0.88	1.02	0.86	1.07	1.06	1.05	10	3	25	19.9	0.11913	0.9525	1.06	1.11286	0.92398
3157.1	tr|Q9VXR1|Q9VXR1_DROME	CG12379 OS=Drosophila melanogaster GN=CG12379 PE=1 SV=2	0.89	1.01	0.98	0.98	1.02	1.11	1	5	2	19	12.8	0.119703	0.965	1.04333	1.08117	0.921896
5198.1	sp|O76879|CCCP_DROME	Circadian clock-controlled protein OS=Drosophila melanogaster GN=anon-3B1.2 PE=2 SV=2	1.12	1.06	1	0.97	0.99	0.97	0.88	1	1	29	1.7	0.119827	1.0375	0.946667	0.91245	0.921447
947.1	tr|Q9W543|Q9W543_DROME	CG17766 OS=Drosophila melanogaster GN=Rbcn-3B PE=2 SV=1	0.99	0.87	1.05	0.93	1.1	1.03	1.03	30	15	168	8.9	0.119833	0.96	1.05333	1.09722	0.921422
4161.1	tr|Q9W478|Q9W478_DROME	CG3097 OS=Drosophila melanogaster GN=CG3097 PE=2 SV=2	0.93	0.99	0.93	0.72	1.41	1.06	0.96	2	2	50	2	0.119965	0.8925	1.14333	1.28105	0.920946
3530.1	tr|Q9VN75|Q9VN75_DROME	CG2022 OS=Drosophila melanogaster GN=CG2022 PE=2 SV=2	0.97	0.93	1.05	0.93	1.06	1.04	1.01	4	1	23	8.8	0.12005	0.97	1.03667	1.06873	0.920636
4047.1	tr|Q9VB06|Q9VB06_DROME	CG12879 OS=Drosophila melanogaster GN=CG12879 PE=2 SV=2	1.15	1.01	0.74	0.68	1.14	1.11	1.18	2	2	53	1.9	0.120227	0.895	1.14333	1.27747	0.919996
2465.1	tr|Q9W236|Q9W236_DROME	Vacuolar protein sorting 20, isoform A OS=Drosophila melanogaster GN=Vps20 PE=1 SV=1	1	0.94	1	0.93	0.98	1.11	1.03	8	4	24	16.6	0.120314	0.9675	1.04	1.07494	0.919684
2955.1	tr|Q9VDE9|Q9VDE9_DROME	FI04035p OS=Drosophila melanogaster GN=RhoGAP93B PE=2 SV=2	1.04	0.84	1	0.93	1.14	1.05	1.01	5	5	146	1.7	0.120383	0.9525	1.06667	1.11986	0.919434
3561.1	tr|Q9VNI7|Q9VNI7_DROME	AT01668p OS=Drosophila melanogaster GN=CG10999 PE=2 SV=1	0.98	0.83	0.9	0.85	1.46	1.01	0.97	3	3	42	3.5	0.120405	0.89	1.14667	1.28839	0.919356
4772.1	tr|Q9VDY6|Q9VDY6_DROME	CG3773 OS=Drosophila melanogaster GN=CG3773 PE=2 SV=1	1.13	0.91	1.09	1.05	0.94	0.96	0.91	1	1	42	1.2	0.120412	1.045	0.936667	0.896332	0.91933
1845.1	tr|Q86BG8|Q86BG8_DROME	CG33056, isoform C OS=Drosophila melanogaster GN=CG33056 PE=2 SV=1	0.98	0.9	1.05	0.94	1.05	1.01	1.07	13	4	36	17.9	0.120884	0.9675	1.04333	1.07838	0.917632
3348.1	sp|Q8SX68|Y0915_DROME	Uncharacterized protein CG10915 OS=Drosophila melanogaster GN=CG10915 PE=1 SV=1	0.98	0.94	0.99	0.98	1.1	1.07	0.96	4	3	65	3.1	0.120923	0.9725	1.04333	1.07284	0.91749
418.1	tr|Q95TW4|Q95TW4_DROME	CG17838, isoform C OS=Drosophila melanogaster GN=CG17838 PE=2 SV=1	0.93	0.93	1.05	0.98	1.05	1.04	1.02	71	15	60	59.5	0.121121	0.9725	1.03667	1.06598	0.916781
4444.1	tr|Q9VGU7|Q9VGU7_DROME	CG14696 OS=Drosophila melanogaster GN=CG14696 PE=1 SV=1	0.83	0.75	1.18	0.83	1.29	1.05	1.08	2	1	50	2	0.121148	0.8975	1.14	1.27019	0.916685
5201.1	sp|P50445|RUX_DROME	Cell cycle negative regulator roughex OS=Drosophila melanogaster GN=rux PE=2 SV=2	0.89	0.76	1.12	0.66	1.05	1.01	1.51	1	1	38	1.3	0.121419	0.8575	1.19	1.38776	0.915714
479.1	sp|Q94529|GS1_DROME	Probable pseudouridine-5'-monophosphatase OS=Drosophila melanogaster GN=Gs1l PE=2 SV=2	0.8	1	0.98	0.99	1	1.05	1.19	62	7	26	120.3	0.121452	0.9425	1.08	1.14589	0.915596
5440.1	tr|Q9VSS3|Q9VSS3_DROME	CG5644 OS=Drosophila melanogaster GN=CG5644 PE=2 SV=1	1.14	0.95	1.21	0.96	0.97	0.86	0.91	1	1	51	1	0.121908	1.065	0.913333	0.85759	0.913967
315.1	sp|Q07171-2|GELS_DROME	Isoform 2 of Gelsolin OS=Drosophila melanogaster GN=Gel	0.99	0.92	1.05	0.9	1.08	1	1.07	91	18	82	55.2	0.121967	0.965	1.05	1.08808	0.913759
2123.1	sp|Q9VBG6|FA203_DROME	FAM203 family protein CG6073 OS=Drosophila melanogaster GN=CG6073 PE=1 SV=2	1	0.9	1.04	0.93	1.09	1.01	1.04	10	6	42	12	0.1221	0.9675	1.04667	1.08183	0.913283
1684.1	sp|P16568|BICD_DROME	Protein bicaudal D OS=Drosophila melanogaster GN=BicD PE=1 SV=2	0.96	0.98	1.02	0.96	1.01	1.08	1	14	9	89	7.9	0.122113	0.98	1.03	1.05102	0.913237
5188.1	tr|Q9VMI8|Q9VMI8_DROME	CG9117 OS=Drosophila melanogaster GN=CG9117-RA PE=2 SV=1	0.97	1.03	0.96	0.97	1.01	1.05	1.01	1	1	25	2	0.122346	0.9825	1.02333	1.04156	0.912409
4276.1	tr|Q59E06|Q59E06_DROME	CG1161, isoform B OS=Drosophila melanogaster GN=CG1161 PE=4 SV=1	1	0.73	1.12	0.69	1.23	1.27	0.97	1	1	29	1.8	0.12254	0.885	1.15667	1.30697	0.911722
2643.1	tr|Q94513|Q94513_DROME	Boundary element associated factor OS=Drosophila melanogaster GN=BEAF-32 PE=2 SV=1	0.97	0.91	1.03	0.97	1.04	1.09	0.99	7	4	32	11	0.122689	0.97	1.04	1.07216	0.911194
3081.1	tr|A1ZB70|A1ZB70_DROME	Glutathione S transferase E5 OS=Drosophila melanogaster GN=GstE5 PE=3 SV=1	0.9	0.98	1.03	0.97	1	1.07	1.04	5	3	25	9.9	0.122701	0.97	1.03667	1.06873	0.911151
4790.1	sp|Q4V6M7|UFSP1_DROME	Probable Ufm1-specific protease 1 OS=Drosophila melanogaster GN=UFSP1 PE=2 SV=1	1.07	0.89	0.92	0.94	1.1	1.08	0.99	1	1	26	1.9	0.12287	0.955	1.05667	1.10646	0.910553
534.1	sp|P13496|DCTN1_DROME	Dynactin subunit 1 OS=Drosophila melanogaster GN=Gl PE=1 SV=2	0.98	0.92	1.04	0.93	1.1	1.03	1	55	21	141	19.5	0.12293	0.9675	1.04333	1.07838	0.910341
109.2	tr|Q0KIE7|Q0KIE7_DROME	Ankyrin, isoform A OS=Drosophila melanogaster GN=Ank PE=2 SV=1	0.98	0.92	1.03	0.98	1.05	1.03	1.01	96	27	170	28.2	0.122956	0.9775	1.03	1.05371	0.910252
830.1	tr|Q9I7P8|Q9I7P8_DROME	CG4365, isoform B OS=Drosophila melanogaster GN=CG4365 PE=1 SV=1	0.99	0.92	1.03	0.97	1.04	1.04	1.01	35	8	30	57.7	0.122956	0.9775	1.03	1.05371	0.910252
5235.1	sp|Q9VS60|SMSR1_DROME	Sphingomyelin synthase-related 1 OS=Drosophila melanogaster GN=SMSr PE=1 SV=2	0.98	0.97	1.03	0.93	1.06	1	1.03	1	1	67	0.8	0.122956	0.9775	1.03	1.05371	0.910252
1315.1	tr|Q9VLN6|Q9VLN6_DROME	CG7627 OS=Drosophila melanogaster GN=CG7627 PE=2 SV=2	1.05	0.91	1	0.86	1.09	1	1.09	20	13	152	6.6	0.122956	0.955	1.06	1.10995	0.910252
5444.1	tr|A1ZBK7|A1ZBK7_DROME	Crammer OS=Drosophila melanogaster GN=cer PE=4 SV=1	1.2	0.6	0.59	1.02	1.25	1.1	1.24	1	1	9	5.3	0.122998	0.8525	1.19667	1.40371	0.9101
5379.1	tr|Q9VRD3|Q9VRD3_DROME	FI06015p OS=Drosophila melanogaster GN=r-cup PE=2 SV=1	0.99	0.77	1.04	0.9	1.04	1.01	1.26	1	1	70	0.7	0.12303	0.925	1.10333	1.19279	0.909991
3550.1	sp|Q9U1H9|NXF1_DROME	Nuclear RNA export factor 1 OS=Drosophila melanogaster GN=sbr PE=1 SV=2	0.98	0.88	1	0.95	1.08	0.95	1.16	3	3	76	2	0.123439	0.9525	1.06333	1.11636	0.908546
785.1	tr|Q9VQ94|Q9VQ94_DROME	CG10882 OS=Drosophila melanogaster GN=gho PE=2 SV=2	1.01	0.9	1.02	0.95	1.09	1.04	1	37	15	129	14.3	0.123531	0.97	1.04333	1.0756	0.908224
3789.1	sp|P42279|TRYU_DROME	Trypsin eta OS=Drosophila melanogaster GN=etaTry PE=2 SV=2	0.95	0.9	1	1.01	1.03	1.13	0.99	3	2	28	5.3	0.123593	0.965	1.05	1.08808	0.908006
297.1	tr|Q9I7Q5|Q9I7Q5_DROME	Cuticular protein 65Au OS=Drosophila melanogaster GN=Cpr65Au PE=2 SV=2	0.98	0.76	1.09	0.8	1.08	1	1.29	95	5	11	415.5	0.123643	0.9075	1.12333	1.23783	0.90783
1520.1	sp|Q24372|LACH_DROME	Lachesin OS=Drosophila melanogaster GN=Lac PE=1 SV=2	0.94	0.96	1.01	1.01	1.01	1.06	1.01	17	6	40	21.3	0.123887	0.98	1.02667	1.04762	0.906974
2657.1	tr|Q7JWS8|Q7JWS8_DROME	AT17867p OS=Drosophila melanogaster GN=Mtl PE=2 SV=1	0.94	0.94	1.03	0.93	1.03	0.98	1.15	7	3	22	16	0.123887	0.96	1.05333	1.09722	0.906974
3774.1	tr|Q9VI57|Q9VI57_DROME	Dephospho-CoA kinase OS=Drosophila melanogaster GN=Dpck PE=2 SV=1	0.91	0.96	1.06	0.91	1.12	0.99	1.06	3	2	27	5.5	0.123951	0.96	1.05667	1.10069	0.90675
9.2	tr|A4V1N9|A4V1N9_DROME	Paramyosin, isoform D OS=Drosophila melanogaster GN=Prm PE=4 SV=1	0.97	0.9	1.04	0.98	1.05	1.02	1.04	1670	50	74	1124.8	0.123976	0.9725	1.03667	1.06598	0.906662
5085.1	tr|Q9VLN1|Q9VLN1_DROME	CG17293 OS=Drosophila melanogaster GN=CG17293 PE=2 SV=1	0.88	0.97	0.99	0.92	1.01	1.23	0.98	1	1	35	1.4	0.124022	0.94	1.07333	1.14184	0.906502
769.1	tr|Q8SXC2|Q8SXC2_DROME	CG6950, isoform A OS=Drosophila melanogaster GN=CG6950-RC PE=2 SV=1	1.01	0.89	1.04	0.91	1.09	1	1.07	38	12	51	37.1	0.124105	0.9625	1.05333	1.09437	0.906209
20.1	sp|P48610-2|KARG_DROME	Isoform A of Arginine kinase OS=Drosophila melanogaster GN=Argk	1	0.89	1.03	0.94	1.1	1	1.04	1354	28	61	1105.7	0.124107	0.965	1.04667	1.08463	0.906204
5072.1	tr|Q9U4G5|Q9U4G5_DROME	BcDNA.GH09817 OS=Drosophila melanogaster GN=Axud1 PE=2 SV=1	0.66	0.9	1.02	1.04	1.24	0.99	1.15	1	1	91	0.6	0.124155	0.905	1.12667	1.24494	0.906034
3000.1	tr|Q9VT61|Q9VT61_DROME	CG8108, isoform A OS=Drosophila melanogaster GN=CG8108 PE=2 SV=1	0.91	0.96	1.02	1.01	1.07	1.03	1.01	5	4	103	2.4	0.124209	0.975	1.03667	1.06325	0.905845
3378.1	sp|Q7K0Y1|BOP1_DROME	Ribosome biogenesis protein BOP1 homolog OS=Drosophila melanogaster GN=CG5033 PE=1 SV=1	0.97	0.91	1.03	0.9	1.01	1.17	1	4	3	90	2.2	0.124224	0.9525	1.06	1.11286	0.905794
3425.1	tr|Q9VLS0|Q9VLS0_DROME	CG8460 OS=Drosophila melanogaster GN=CG8460 PE=2 SV=1	0.99	0.93	1.02	0.96	0.99	1.08	1.03	4	2	46	4.4	0.124318	0.975	1.03333	1.05983	0.905467
83.2	sp|P48602|VATA1_DROME	V-type proton ATPase catalytic subunit A isoform 1 OS=Drosophila melanogaster GN=Vha68-1 PE=2 SV=2	1	0.91	1.03	0.96	1.05	1.03	1.02	308	31	68	225.4	0.124318	0.975	1.03333	1.05983	0.905467
615.3	sp|Q9VG96|GSTT4_DROME	Glutathione S-transferase D4 OS=Drosophila melanogaster GN=GstD4 PE=1 SV=1	1.01	0.89	1.05	0.9	1.06	1.04	1.05	10	3	25	20.2	0.124318	0.9625	1.05	1.09091	0.905467
1611.1	tr|Q9VDL7|Q9VDL7_DROME	Alternative testis transcripts open reading frame A, isoform A OS=Drosophila melanogaster GN=att-ORFA PE=2 SV=2	1.05	0.87	1	0.93	1.06	1.03	1.06	15	8	40	18.6	0.124318	0.9625	1.05	1.09091	0.905467
1963.1	tr|Q9VH01|Q9VH01_DROME	BIR-containing ubiquitin-conjugating enzyme OS=Drosophila melanogaster GN=Bruce PE=2 SV=3	0.96	0.88	1.03	0.91	1.22	1	1.01	11	10	539	1	0.12473	0.945	1.07667	1.13933	0.904029
4210.1	tr|Q9VRM1|Q9VRM1_DROME	CG13285 OS=Drosophila melanogaster GN=CG13285 PE=2 SV=1	0.85	0.9	1.09	0.94	1.11	1	1.1	2	2	22	4.6	0.124929	0.945	1.07	1.13228	0.903336
288.1	tr|Q9V420|Q9V420_DROME	FI02878p OS=Drosophila melanogaster GN=Su(P) PE=2 SV=1	1	0.89	1.02	0.97	1.05	1.07	1	97	9	47	103	0.125082	0.97	1.04	1.07216	0.902805
2577.1	sp|O97069|ASSY_DROME	Argininosuccinate synthase OS=Drosophila melanogaster GN=CG1315 PE=1 SV=1	0.94	0.86	1.09	0.91	1.12	1.02	1.06	7	5	47	7.5	0.125178	0.95	1.06667	1.12281	0.902473
4305.1	tr|Q9VIM1|Q9VIM1_DROME	CG31688, isoform C OS=Drosophila melanogaster GN=CG31688 PE=1 SV=4	1.08	1.03	0.98	1	0.96	0.99	0.97	2	2	75	1.3	0.125669	1.0225	0.973333	0.951915	0.900772
540.1	tr|Q9V4E7|Q9V4E7_DROME	Transporter OS=Drosophila melanogaster GN=CG1732 PE=2 SV=4	0.91	0.95	1.06	0.95	1.08	1	1.06	55	8	72	38.1	0.125841	0.9675	1.04667	1.08183	0.900177
4603.1	sp|P33085-4|SHAKB_DROME	Isoform D of Innexin shaking-B OS=Drosophila melanogaster GN=shakB	0.81	0.91	1.01	1.06	1.06	1.04	1.12	2	1	61	1.6	0.126086	0.9475	1.07333	1.13281	0.899335
4473.1	tr|O97454|O97454_DROME	L(1)10Bb OS=Drosophila melanogaster GN=l(1)10Bb PE=2 SV=1	0.86	0.76	1.11	0.96	1.2	1.02	1.09	2	1	17	5.9	0.126134	0.9225	1.10333	1.19603	0.899166
4931.1	tr|Q9VA69|Q9VA69_DROME	Prolyl 4-hydroxylase alpha-related protein PH4[alpha]EFB OS=Drosophila melanogaster GN=PH4alphaEFB PE=2 SV=2	0.98	1.04	1.01	1.2	0.87	0.87	1.03	1	1	63	0.8	0.126344	1.0575	0.923333	0.873128	0.898444
2538.1	sp|Q7KNA0|DYM_DROME	Dymeclin OS=Drosophila melanogaster GN=CG8230 PE=1 SV=1	0.99	0.85	1.04	0.96	1.11	1.02	1.04	7	6	79	4.4	0.126454	0.96	1.05667	1.10069	0.898066
5348.1	tr|Q8SWW7|Q8SWW7_DROME	CG3726 OS=Drosophila melanogaster GN=CG3726 PE=2 SV=1	0.98	0.94	1.05	0.94	1.06	1.03	1.02	1	1	74	0.7	0.126463	0.9775	1.03667	1.06053	0.898036
3027.1	sp|Q9GQQ0-2|SPIN_DROME	Isoform B of Protein spinster OS=Drosophila melanogaster GN=spin	1.02	0.86	1.01	0.91	1.18	1	1.03	5	4	69	3.6	0.126539	0.95	1.07	1.12632	0.897775
3499.1	tr|Q8IMC0|Q8IMC0_DROME	CG2316, isoform F OS=Drosophila melanogaster GN=CG2316 PE=2 SV=1	0.92	0.91	1.01	1	1.01	1.15	1	4	2	62	3.2	0.126572	0.96	1.05333	1.09722	0.897662
1563.1	tr|Q9VHB5|Q9VHB5_DROME	SD10846p OS=Drosophila melanogaster GN=Vps45 PE=2 SV=1	1	0.9	1.03	0.88	1.09	1.11	0.97	16	7	65	12.3	0.126604	0.9525	1.05667	1.10936	0.897552
2802.1	tr|Q8IRE4|Q8IRE4_DROME	CG32281 OS=Drosophila melanogaster GN=CG32281-RA PE=2 SV=2	0.86	0.95	0.95	0.94	1.08	1.3	0.92	6	4	53	5.7	0.126989	0.925	1.1	1.18919	0.896235
787.1	tr|Q9VSD6|Q9VSD6_DROME	D-Importin 7/RanBP7 OS=Drosophila melanogaster GN=msk PE=2 SV=1	0.99	0.94	1.02	0.99	1.04	1.02	1.01	37	12	119	15.5	0.126992	0.985	1.02333	1.03892	0.896223
1062.1	tr|Q9VD55|Q9VD55_DROME	Cytochrome c heme lyase OS=Drosophila melanogaster GN=Cchl PE=2 SV=1	0.99	1.04	1.08	1.13	1.06	0.92	0.77	27	9	32	42.2	0.127005	1.06	0.916667	0.86478	0.896179
312.1	tr|Q7KTI5|Q7KTI5_DROME	CG8086, isoform F OS=Drosophila melanogaster GN=CG8086 PE=2 SV=2	0.98	0.92	1.05	0.95	1.05	1.02	1.04	91	38	179	25.4	0.127282	0.975	1.03667	1.06325	0.895234
1386.1	sp|Q8I0G5-3|COPG_DROME	Isoform C of Coatomer subunit gamma OS=Drosophila melanogaster GN=gammaCop	0.94	0.9	1.06	0.96	1.07	1.05	1.01	19	10	97	9.8	0.127351	0.965	1.04333	1.08117	0.894997
3482.1	sp|Q9V9U4|DOHH_DROME	Deoxyhypusine hydroxylase OS=Drosophila melanogaster GN=nero PE=2 SV=1	0.91	0.73	0.86	1.11	0.96	1.13	1.29	4	2	34	6	0.127378	0.9025	1.12667	1.24838	0.894906
1987.1	tr|Q9VB22|Q9VB22_DROME	LD33695p OS=Drosophila melanogaster GN=raps PE=2 SV=1	1.09	0.92	1.13	1.04	0.98	0.95	0.88	11	7	71	7.7	0.127405	1.045	0.936667	0.896332	0.894814
2101.1	tr|Q3KN41|Q3KN41_DROME	LP14275p OS=Drosophila melanogaster GN=Nrx-1 PE=2 SV=1	1.01	0.93	1.01	0.93	1.09	0.98	1.05	10	7	199	2.5	0.127464	0.97	1.04	1.07216	0.894612
1789.1	tr|Q9VS84|Q9VS84_DROME	CG32372 OS=Drosophila melanogaster GN=ltl PE=2 SV=2	0.94	0.82	1.12	0.88	1.12	1.05	1.08	13	7	91	7.2	0.127572	0.94	1.08333	1.15248	0.894245
41.2	tr|A1Z6P2|A1Z6P2_DROME	Lethal (2) 01289, isoform A OS=Drosophila melanogaster GN=l(2)01289 PE=4 SV=1	0.98	0.89	1.05	0.94	1.06	1	1.08	252	29	97	129.4	0.127609	0.965	1.04667	1.08463	0.894117
41.3	tr|E1JGY7|E1JGY7_DROME	Lethal (2) 01289, isoform G OS=Drosophila melanogaster GN=l(2)01289 PE=4 SV=1	0.98	0.89	1.05	0.94	1.06	1	1.08	251	29	136	92	0.127609	0.965	1.04667	1.08463	0.894117
4324.1	tr|Q86BG2|Q86BG2_DROME	CG10543, isoform C OS=Drosophila melanogaster GN=CG10543 PE=2 SV=1	0.84	0.86	0.99	0.9	0.94	1.04	1.43	2	2	115	0.9	0.127723	0.8975	1.13667	1.26648	0.893732
4051.1	sp|Q9VCA2|ORCT_DROME	Organic cation transporter protein OS=Drosophila melanogaster GN=Orct PE=1 SV=1	0.88	0.94	1.04	0.97	1.08	1.12	0.97	2	2	61	1.6	0.127785	0.9575	1.05667	1.10357	0.893522
686.1	sp|Q27869|PIMT_DROME	Protein-L-isoaspartate(D-aspartate) O-methyltransferase OS=Drosophila melanogaster GN=Pcmt PE=1 SV=2	1	0.88	1.04	0.92	1.1	1.07	0.99	43	5	25	87.5	0.127909	0.96	1.05333	1.09722	0.893098
4580.1	tr|O97132|O97132_DROME	Abnormal X segregation OS=Drosophila melanogaster GN=Axs PE=2 SV=1	0.99	0.94	1	0.95	1.11	0.98	1.02	2	1	75	1.3	0.127963	0.97	1.03667	1.06873	0.892916
4634.1	tr|Q9VC58|Q9VC58_DROME	LD37002p OS=Drosophila melanogaster GN=Syx18 PE=2 SV=1	0.91	0.82	1.05	0.88	0.94	1.31	1.08	1	1	45	1.1	0.128262	0.915	1.11	1.21311	0.891903
2389.1	sp|Q95029-2|CATL_DROME	Isoform A of Cathepsin L OS=Drosophila melanogaster GN=Cp1	0.96	0.86	1.09	0.88	1.06	1.02	1.13	8	6	38	10.5	0.128578	0.9475	1.07	1.12929	0.890833
5449.1	tr|Q9W4A5|Q9W4A5_DROME	CG42492, isoform B OS=Drosophila melanogaster GN=CG17761 PE=2 SV=1	0.53	0.85	1.18	0.84	1.46	1.12	1.02	1	1	11	4.5	0.128793	0.85	1.2	1.41176	0.890108
4404.1	tr|Q7JZR4|Q7JZR4_DROME	Na[+]-dependent inorganic phosphate cotransporter OS=Drosophila melanogaster GN=NaPi-T PE=2 SV=1	0.9	1.04	0.95	0.96	1.1	1.08	0.97	2	1	59	1.7	0.128888	0.9625	1.05	1.09091	0.889789
2015.1	tr|Q8I935|Q8I935_DROME	CG33523, isoform D OS=Drosophila melanogaster GN=CG33523 PE=2 SV=2	0.97	0.86	1.03	0.91	1.11	1.18	0.94	11	6	56	9.8	0.128931	0.9425	1.07667	1.14235	0.889644
2425.1	tr|Q9VM22|Q9VM22_DROME	CG5149, isoform A OS=Drosophila melanogaster GN=CG5149 PE=2 SV=1	0.9	0.92	1.1	0.84	1.15	0.99	1.1	8	5	51	7.8	0.129243	0.94	1.08	1.14894	0.888593
1274.1	tr|Q0E8C8|Q0E8C8_DROME	CG6680, isoform A OS=Drosophila melanogaster GN=Spn77Ba PE=2 SV=1	0.99	0.95	1.03	0.95	1.03	1	1.05	21	9	50	20.9	0.129243	0.98	1.02667	1.04762	0.888593
1400.1	tr|Q9VM12|Q9VM12_DROME	CG5958 OS=Drosophila melanogaster GN=CG5958 PE=1 SV=1	1.1	0.97	1.1	0.97	0.95	0.94	0.97	19	7	34	28	0.129352	1.035	0.953333	0.921095	0.888228
1670.1	sp|Q7K1V5|JAGN_DROME	Protein jagunal OS=Drosophila melanogaster GN=jagn PE=1 SV=1	1.04	0.9	1.01	0.91	1.05	1.01	1.08	15	3	23	32.6	0.129352	0.965	1.04667	1.08463	0.888228
1244.1	tr|Q9VIJ4|Q9VIJ4_DROME	FI01467p OS=Drosophila melanogaster GN=vari PE=2 SV=4	1.01	0.96	0.99	0.97	1.05	1.04	0.98	22	8	70	15.7	0.129352	0.9825	1.02333	1.04156	0.888228
1067.1	sp|Q9VG97|GSTT3_DROME	Glutathione S-transferase D3 OS=Drosophila melanogaster GN=GstD3 PE=2 SV=1	0.98	0.86	1.07	0.87	1.1	0.99	1.11	27	7	23	59	0.129436	0.945	1.06667	1.12875	0.887945
4137.1	tr|Q9VGE7|Q9VGE7_DROME	Beta-galactosidase OS=Drosophila melanogaster GN=Ect3 PE=2 SV=1	1.1	1	0.99	1.11	0.98	1.01	0.81	2	2	72	1.4	0.129456	1.05	0.933333	0.888889	0.887878
4430.1	sp|P42278|TRYT_DROME	Trypsin theta OS=Drosophila melanogaster GN=thetaTry PE=2 SV=2	1.05	0.83	0.96	0.96	1.04	1.15	1.01	2	1	28	3.5	0.129456	0.95	1.06667	1.12281	0.887878
4709.1	sp|O76924|ARI2_DROME	Protein ariadne-2 OS=Drosophila melanogaster GN=ari-2 PE=1 SV=1	1.03	0.92	1.02	0.92	1.02	1.06	1.04	1	1	59	0.8	0.129491	0.9725	1.04	1.06941	0.887762
2497.1	tr|Q9VIH1|Q9VIH1_DROME	CG9273 protein OS=Drosophila melanogaster GN=RPA2 PE=2 SV=2	0.95	0.92	0.99	0.99	0.96	1.05	1.15	8	3	26	15.2	0.129756	0.9625	1.05333	1.09437	0.886872
4544.1	sp|Q8SXT3|HFW2_DROME	Protein singed wings 2 OS=Drosophila melanogaster GN=swi2 PE=2 SV=1	0.89	0.96	1.03	1	1.01	1.07	1.04	2	1	58	1.7	0.129835	0.97	1.04	1.07216	0.88661
50.1	sp|Q94522|SUCA_DROME	Succinyl-CoA ligase [GDP-forming] subunit alpha, mitochondrial OS=Drosophila melanogaster GN=Scsalpha PE=2 SV=3	0.94	0.94	1.04	0.98	1.03	1	1.08	618	12	34	899.1	0.130335	0.975	1.03667	1.06325	0.884938
43.1	sp|P13395|SPTCA_DROME	Spectrin alpha chain OS=Drosophila melanogaster GN=alpha-Spec PE=1 SV=2	0.99	0.92	1.04	0.95	1.07	1.03	1.01	683	104	278	122.8	0.130335	0.975	1.03667	1.06325	0.884938
3150.1	tr|Q9VZW1|Q9VZW1_DROME	GH10494p OS=Drosophila melanogaster GN=scramb2 PE=2 SV=1	1.04	0.92	1	0.94	1.02	1.03	1.06	5	2	30	8.5	0.130335	0.975	1.03667	1.06325	0.884938
3780.1	tr|Q9W509|Q9W509_DROME	EG:103B4.3 protein OS=Drosophila melanogaster GN=Mct1 PE=2 SV=2	1.03	0.83	1.04	0.92	1.05	1.05	1.09	3	2	68	2.2	0.130373	0.955	1.06333	1.11344	0.884813
176.1	sp|O18404|HCD2_DROME	3-hydroxyacyl-CoA dehydrogenase type-2 OS=Drosophila melanogaster GN=scu PE=1 SV=1	1.03	0.94	1	0.94	1.02	1.02	1.04	156	10	27	290.1	0.130479	0.9775	1.02667	1.0503	0.884458
2454.1	tr|Q9VX35|Q9VX35_DROME	CG8289 OS=Drosophila melanogaster GN=CG8289 PE=2 SV=1	0.8	0.95	1.02	1	1.17	1	1.05	8	4	37	10.7	0.130602	0.9425	1.07333	1.13882	0.88405
5405.1	sp|Q9GYV9|MED7_DROME	Mediator of RNA polymerase II transcription subunit 7 OS=Drosophila melanogaster GN=MED7 PE=1 SV=1	0.95	1.21	1.08	1.03	0.97	0.99	0.77	1	1	26	1.9	0.130943	1.0675	0.91	0.852459	0.882919
845.1	tr|Q9VWD9|Q9VWD9_DROME	LD38919p OS=Drosophila melanogaster GN=Ubqn PE=2 SV=1	0.99	0.93	1.01	0.96	1.03	1.09	0.98	34	10	59	28.9	0.131	0.9725	1.03333	1.06255	0.882728
1048.1	sp|P18931|NU4M_DROME	NADH-ubiquinone oxidoreductase chain 4 OS=Drosophila melanogaster GN=mt:ND4 PE=3 SV=2	1.02	0.89	1.01	0.95	1.07	1.07	0.99	28	4	51	27.3	0.131036	0.9675	1.04333	1.07838	0.882608
4408.1	tr|A1ZAQ9|A1ZAQ9_DROME	CG15917 OS=Drosophila melanogaster GN=CG15917 PE=4 SV=1	0.98	1.05	1.03	1.04	1.02	0.97	0.91	2	1	13	7.6	0.131157	1.025	0.966667	0.943089	0.882208
447.1	tr|Q8IR24|Q8IR24_DROME	Stunted, isoform B OS=Drosophila melanogaster GN=sun PE=2 SV=1	1.07	0.98	1.04	1.01	1.02	0.95	0.93	67	2	6	528.7	0.131157	1.025	0.966667	0.943089	0.882208
1799.1	tr|Q9W0H8|Q9W0H8_DROME	IP16409p OS=Drosophila melanogaster GN=scf PE=2 SV=2	1.01	0.95	1.03	0.86	1.08	1	1.08	13	7	38	17.1	0.131159	0.9625	1.05333	1.09437	0.882203
5141.1	tr|Q7K4G8|Q7K4G8_DROME	CG12391 OS=Drosophila melanogaster GN=CG12391 PE=2 SV=1	0.89	0.86	1.14	0.79	1.24	1.04	1.05	1	1	66	0.8	0.131274	0.92	1.11	1.20652	0.881823
1557.1	tr|Q8SXX1|Q8SXX1_DROME	CG17471, isoform A OS=Drosophila melanogaster GN=CG17471 PE=2 SV=1	0.98	0.96	1.04	0.93	1.05	1.01	1.03	16	7	47	17	0.131409	0.9775	1.03	1.05371	0.881377
1380.1	sp|Q9V3S9|BGM_DROME	Very long-chain-fatty-acid--CoA ligase bubblegum OS=Drosophila melanogaster GN=bgm PE=2 SV=1	1.03	0.93	1	0.96	1.03	1.05	1.01	19	10	74	12.9	0.13144	0.98	1.03	1.05102	0.881273
5622.1	tr|A1Z831|A1Z831_DROME	CG12128, isoform B OS=Drosophila melanogaster GN=CG12128 PE=4 SV=1	0.99	0.81	0.98	0.93	1.24	1.12	0.92	1	1	28	1.8	0.131733	0.9275	1.09333	1.1788	0.880304
1983.1	tr|Q8IQV9|Q8IQV9_DROME	CG11943, isoform B OS=Drosophila melanogaster GN=CG11943 PE=2 SV=1	0.98	0.93	1.03	0.88	1.15	0.98	1.04	11	8	235	2.3	0.131883	0.955	1.05667	1.10646	0.879811
4368.1	tr|Q9VZE2|Q9VZE2_DROME	CG15012, isoform B OS=Drosophila melanogaster GN=CG15012 PE=2 SV=2	0.75	0.99	1.01	1.01	1.09	1.09	1.05	2	1	17	5.9	0.131926	0.94	1.07667	1.14539	0.879669
499.1	tr|Q9VZT8|Q9VZT8_DROME	CG14964 OS=Drosophila melanogaster GN=CG14964 PE=2 SV=2	0.99	0.93	1.02	0.95	1.1	1.04	0.98	59	25	159	18.6	0.132029	0.9725	1.04	1.06941	0.879331
146.1	tr|Q7K2W6|Q7K2W6_DROME	GH04080p OS=Drosophila melanogaster GN=proPO-A1 PE=2 SV=1	0.98	0.93	1.04	0.94	1.07	1.05	0.99	189	28	79	119.6	0.132446	0.9725	1.03667	1.06598	0.87796
3111.1	sp|P53624|MA121_DROME	Mannosyl-oligosaccharide alpha-1,2-mannosidase isoform A OS=Drosophila melanogaster GN=alpha-Man-I PE=1 SV=2	0.84	0.91	1.09	0.93	1.16	1.1	0.98	5	3	75	3.3	0.132546	0.9425	1.08	1.14589	0.877634
1118.1	sp|Q9V3Y3|DFP_DROME	Defense protein l(2)34Fc OS=Drosophila melanogaster GN=l(2)34Fc PE=2 SV=1	0.97	0.93	1.02	0.93	1.15	1.04	0.97	26	3	17	75.4	0.132557	0.9625	1.05333	1.09437	0.877596
3764.1	sp|P37193|ADXH_DROME	Adrenodoxin-like protein, mitochondrial OS=Drosophila melanogaster GN=Fdxh PE=2 SV=3	1.13	0.99	1.16	0.94	1.01	0.86	0.9	3	2	20	7.6	0.132768	1.055	0.923333	0.875197	0.876906
3933.1	tr|Q9VSD8|Q9VSD8_DROME	CG7550 OS=Drosophila melanogaster GN=CG7550 PE=2 SV=1	0.96	0.91	1.06	0.87	1.13	0.96	1.12	3	1	27	5.5	0.132977	0.95	1.07	1.12632	0.876222
862.1	tr|Q9VAV2|Q9VAV2_DROME	CG12413 OS=Drosophila melanogaster GN=CG12413 PE=2 SV=2	0.92	0.95	1.06	0.94	1.09	1.01	1.03	33	15	77	21.5	0.133042	0.9675	1.04333	1.07838	0.876011
4000.1	tr|Q4QQ70|Q4QQ70_DROME	CG15602 OS=Drosophila melanogaster GN=CG15602 PE=2 SV=1	0.99	0.8	1.1	0.78	1.22	1	1.1	2	2	39	2.6	0.133166	0.9175	1.10667	1.20618	0.875605
1060.1	tr|Q9VPY7|Q9VPY7_DROME	CG5126 OS=Drosophila melanogaster GN=CG5126 PE=2 SV=1	1	0.87	1.04	0.95	1.05	1.09	1.01	27	11	53	25.6	0.133243	0.965	1.05	1.08808	0.875356
2828.1	tr|Q960D3|Q960D3_DROME	SD06613p OS=Drosophila melanogaster GN=vig2 PE=2 SV=1	0.85	0.93	1.08	0.97	1.07	1.07	1.04	6	4	45	6.6	0.133297	0.9575	1.06	1.10705	0.87518
1812.1	tr|Q7KT70|Q7KT70_DROME	Gliotactin, isoform A OS=Drosophila melanogaster GN=Gli PE=2 SV=1	1.04	0.94	0.99	0.93	1.07	1.04	1	13	6	109	6	0.13337	0.975	1.03667	1.06325	0.874943
414.1	sp|Q8MSS1|LVA_DROME	Protein lava lamp OS=Drosophila melanogaster GN=lva PE=1 SV=2	1.02	0.88	1.03	0.92	1.08	1.05	1.01	71	39	316	11.2	0.133391	0.9625	1.04667	1.08745	0.874874
2549.1	tr|Q1WWH6|Q1WWH6_DROME	RE42507p OS=Drosophila melanogaster GN=stumps PE=2 SV=1	0.97	0.91	1.02	0.92	1.11	1.13	0.94	7	6	135	2.6	0.133499	0.955	1.06	1.10995	0.874522
321.1	tr|Q9VBP6|Q9VBP6_DROME	GH21316p OS=Drosophila melanogaster GN=Ssadh PE=2 SV=1	1.02	0.9	1.03	0.92	1.05	1.02	1.05	89	14	55	81	0.133616	0.9675	1.04	1.07494	0.874143
4952.1	tr|Q9VTH0|Q9VTH0_DROME	CG6199, isoform A OS=Drosophila melanogaster GN=Plod PE=2 SV=1	0.97	0.93	0.87	1.03	1.16	0.95	1.09	1	1	82	0.6	0.133697	0.95	1.06667	1.12281	0.873878
89.1	tr|Q9VWV6|Q9VWV6_DROME	Transferrin 1 OS=Drosophila melanogaster GN=Tsf1 PE=2 SV=1	0.99	0.82	1.09	0.81	1.07	1.01	1.21	331	19	72	230.6	0.133839	0.9275	1.09667	1.18239	0.873418
5006.1	tr|Q7JRM5|Q7JRM5_DROME	CG11127 OS=Drosophila melanogaster GN=CG11127 PE=2 SV=1	1.09	1.03	1	1.07	1	1.01	0.8	1	1	52	1	0.13384	1.0475	0.936667	0.894193	0.873414
3757.1	tr|Q8MSJ6|Q8MSJ6_DROME	CG31207 OS=Drosophila melanogaster GN=CG7096 PE=2 SV=1	1	0.99	1.15	1.09	0.89	1.06	0.83	3	2	30	5	0.133969	1.0575	0.926667	0.876281	0.872994
5746.1	tr|Q0E8F0|Q0E8F0_DROME	Capricious, isoform C OS=Drosophila melanogaster GN=caps PE=4 SV=1	0.48	0.56	1.23	1.04	1.36	1.27	1.07	1	1	81	0.6	0.134492	0.8275	1.23333	1.49043	0.871305
5270.1	tr|Q8SX97|Q8SX97_DROME	CG5718 OS=Drosophila melanogaster GN=CG5718 PE=2 SV=1	1.01	0.96	0.91	1.01	1.01	1.1	1.01	1	1	72	0.7	0.134554	0.9725	1.04	1.06941	0.871104
3046.1	tr|Q9W1F2|Q9W1F2_DROME	CG16787 OS=Drosophila melanogaster GN=CG16787-RA PE=2 SV=2	0.94	0.84	0.98	0.95	1.3	0.95	1.04	5	3	29	8.6	0.134641	0.9275	1.09667	1.18239	0.870822
5339.1	sp|Q9VDS6|SURF6_DROME	Surfeit locus protein 6 homolog OS=Drosophila melanogaster GN=Surf6 PE=1 SV=1	0.77	0.98	0.96	1.04	1.07	1	1.18	1	1	38	1.3	0.134676	0.9375	1.08333	1.15556	0.870711
915.1	tr|Q960D4|Q960D4_DROME	CG4199, isoform B OS=Drosophila melanogaster GN=EG:22E5.5 PE=2 SV=1	1	0.95	1.02	0.95	1.05	1.02	1	31	15	65	23.9	0.13479	0.98	1.02333	1.04422	0.870342
26.1	sp|A1ZA47|ZASP_DROME	PDZ and LIM domain protein Zasp OS=Drosophila melanogaster GN=Zasp52 PE=1 SV=2	0.99	0.94	1.03	0.96	1.04	1.01	1.02	1070	65	238	224.9	0.13479	0.98	1.02333	1.04422	0.870342
3146.1	tr|Q961R9|Q961R9_DROME	CG6126 OS=Drosophila melanogaster GN=CG6126 PE=2 SV=1	1.02	0.89	1.03	0.86	1.13	0.98	1.08	5	2	61	4.1	0.134832	0.95	1.06333	1.1193	0.870205
1937.1	sp|Q9VAY3|MFRN_DROME	Mitoferrin OS=Drosophila melanogaster GN=mfrn PE=1 SV=1	0.97	0.92	1.02	0.95	1.13	1	1	12	4	42	14.4	0.134884	0.965	1.04333	1.08117	0.870039
5612.1	tr|A8JR00|A8JR00_DROME	CG34383, isoform E OS=Drosophila melanogaster GN=CG34383 PE=4 SV=1	1.05	0.96	1.11	1.01	1.01	0.92	0.93	1	1	228	0.2	0.135073	1.0325	0.953333	0.923325	0.869431
1694.1	sp|Q8SYG2|CSN3_DROME	COP9 signalosome complex subunit 3 OS=Drosophila melanogaster GN=CSN3 PE=1 SV=2	0.98	0.92	1.03	0.96	1.07	1.06	0.98	14	8	51	13.8	0.135237	0.9725	1.03667	1.06598	0.868904
224.1	tr|Q7JWF1|Q7JWF1_DROME	CG12140 OS=Drosophila melanogaster GN=CG12140 PE=2 SV=1	1	0.91	1.04	0.94	1.03	1.02	1.06	116	17	66	88	0.135237	0.9725	1.03667	1.06598	0.868904
4251.1	tr|Q9V9P0|Q9V9P0_DROME	CG6675 OS=Drosophila melanogaster GN=CG6675 PE=1 SV=4	1.03	0.76	1.08	0.82	1.2	1.03	1.08	2	2	44	2.3	0.13533	0.9225	1.10333	1.19603	0.868607
5524.1	tr|Q8MUJ1|Q8MUJ1_DROME	DARTH OS=Drosophila melanogaster GN=egr PE=2 SV=1	1.06	0.94	0.87	0.85	1.25	1.08	0.95	1	1	47	1.1	0.1354	0.93	1.09333	1.17563	0.868381
2490.1	tr|Q95RR1|Q95RR1_DROME	Atox1 OS=Drosophila melanogaster GN=Atox1 PE=2 SV=1	1	0.85	1.05	0.89	1.16	0.99	1.06	8	3	8	51.5	0.135496	0.9475	1.07	1.12929	0.868075
118.2	sp|P29310-2|1433Z_DROME	Isoform VI' of 14-3-3 protein zeta OS=Drosophila melanogaster GN=14-3-3zeta	0.92	0.97	1.02	1	1	1.06	1.03	213	11	28	376.8	0.13558	0.9775	1.03	1.05371	0.867803
347.1	tr|Q7KTC1|Q7KTC1_DROME	Multidrug-Resistance like protein 1, isoform K OS=Drosophila melanogaster GN=MRP PE=2 SV=1	0.98	0.94	1.04	0.95	1.04	1.05	1	84	30	174	24.2	0.13558	0.9775	1.03	1.05371	0.867803
5595.1	tr|Q9W5S7|Q9W5S7_DROME	DISCO interacting protein 1, isoform F OS=Drosophila melanogaster GN=DIP1 PE=1 SV=3	1.01	0.94	1	0.96	0.98	1.07	1.04	1	1	43	1.2	0.13558	0.9775	1.03	1.05371	0.867803
5378.1	tr|Q9VN63|Q9VN63_DROME	CG14657 OS=Drosophila melanogaster GN=CG14657 PE=2 SV=1	0.99	0.81	0.98	1.01	1.06	1.15	0.99	1	1	46	1.1	0.135698	0.9475	1.06667	1.12577	0.867427
4041.1	sp|Q9VL13|MOB3_DROME	Mps one binder kinase activator-like 3 OS=Drosophila melanogaster GN=Mob3 PE=2 SV=1	0.91	0.92	1.04	0.96	1.14	0.97	1.05	2	2	26	3.9	0.135795	0.9575	1.05333	1.10009	0.867117
1639.1	tr|Q7KSM5|Q7KSM5_DROME	Aos1 OS=Drosophila melanogaster GN=Aos1 PE=2 SV=1	0.97	0.9	1.05	0.95	1.07	1.05	1	15	6	38	19.9	0.135798	0.9675	1.04	1.07494	0.867108
4939.1	tr|Q86BM8|Q86BM8_DROME	Mitochondrial ribosomal protein L27 OS=Drosophila melanogaster GN=mRpL27 PE=1 SV=1	1.06	1.12	1.16	0.92	0.85	0.85	1.05	1	1	16	3.1	0.135827	1.065	0.916667	0.86072	0.867015
4494.1	tr|Q8IRJ5|Q8IRJ5_DROME	CG32845 OS=Drosophila melanogaster GN=CG32845 PE=2 SV=1	0.78	0.84	1.07	1.02	1.21	1.03	1.05	2	1	44	2.3	0.135842	0.9275	1.09667	1.18239	0.866966
1141.1	tr|Q9W0J9|Q9W0J9_DROME	CG9119 OS=Drosophila melanogaster GN=CG9119 PE=2 SV=1	0.95	0.88	1.08	0.92	1.11	1.03	1.03	25	7	36	35.1	0.135997	0.9575	1.05667	1.10357	0.866471
1287.1	sp|Q09024-3|IMPL2_DROME	Isoform B of Neural/ectodermal development factor IMP-L2 OS=Drosophila melanogaster GN=ImpL2	1.05	0.84	1.01	0.93	1.08	1.05	1.04	21	7	29	35.7	0.135997	0.9575	1.05667	1.10357	0.866471
3193.1	tr|Q9VIH8|Q9VIH8_DROME	CG14401 OS=Drosophila melanogaster GN=CG14401 PE=2 SV=2	0.94	0.83	1.04	0.93	1.25	0.99	1.02	5	1	15	16.4	0.136035	0.935	1.08667	1.16221	0.86635
1334.1	tr|Q9V491|Q9V491_DROME	Plexin A, isoform A OS=Drosophila melanogaster GN=plexA PE=2 SV=1	1.02	0.93	1.02	0.95	1.04	1.03	1.02	20	10	218	4.6	0.136037	0.98	1.03	1.05102	0.866343
3813.1	tr|Q9VMH2|Q9VMH2_DROME	Arc-p20 OS=Drosophila melanogaster GN=Arc-p20 PE=2 SV=1	0.97	1.04	1.02	1.02	0.97	0.98	0.99	3	2	20	7.7	0.136145	1.0125	0.98	0.967901	0.865997
2413.1	sp|P08266|RPB2_DROME	DNA-directed RNA polymerase II subunit RPB2 OS=Drosophila melanogaster GN=RpII140 PE=2 SV=2	0.91	0.88	1.04	0.96	1.13	1.13	0.94	8	5	134	3	0.136503	0.9475	1.06667	1.12577	0.864858
4423.1	tr|P91659|P91659_DROME	CG2187 OS=Drosophila melanogaster GN=D3-100EF PE=2 SV=1	1	1.07	0.86	0.9	1.04	1.09	1.05	2	1	69	1.5	0.13657	0.9575	1.06	1.10705	0.864644
4407.1	tr|Q9VSE5|Q9VSE5_DROME	CG13675 OS=Drosophila melanogaster GN=CG13675 PE=2 SV=3	0.66	0.89	1.05	0.95	1.07	0.97	1.4	2	1	17	5.8	0.136587	0.8875	1.14667	1.29202	0.864591
2404.1	tr|Q7K1I4|Q7K1I4_DROME	GH05668p OS=Drosophila melanogaster GN=Tsp42Ea PE=2 SV=1	1.07	0.92	0.88	0.98	1.09	1.04	1.03	8	5	26	15.4	0.136728	0.9625	1.05333	1.09437	0.864143
2796.1	sp|Q9VED0|TAPT1_DROME	Protein TAPT1 homolog OS=Drosophila melanogaster GN=CG7218 PE=2 SV=2	1.11	0.8	0.94	0.76	1.34	1.03	1.02	6	4	76	4	0.136808	0.9025	1.13	1.25208	0.86389
5197.1	tr|Q9VXW3|Q9VXW3_DROME	CG12608 OS=Drosophila melanogaster GN=CG12608 PE=2 SV=2	0.92	0.96	0.87	1.01	1.24	1.01	0.98	1	1	49	1	0.136842	0.94	1.07667	1.14539	0.863781
1942.1	tr|Q9VAK1|Q9VAK1_DROME	Alphabet, isoform A OS=Drosophila melanogaster GN=alph PE=2 SV=1	1.03	0.97	1.08	1.04	0.96	1.02	0.9	12	4	41	14.7	0.136876	1.03	0.96	0.932039	0.863671
1509.1	sp|P91622|PDK_DROME	[Pyruvate dehydrogenase [lipoamide]] kinase, mitochondrial OS=Drosophila melanogaster GN=Pdk PE=2 SV=2	0.95	0.94	1.04	0.96	1.03	0.99	1.1	17	7	47	18.2	0.137065	0.9725	1.04	1.06941	0.863074
4280.1	tr|Q2PDW1|Q2PDW1_DROME	CG3662, isoform B OS=Drosophila melanogaster GN=CG3662 PE=4 SV=1	0.92	0.97	1.02	0.98	1.01	1.11	1	2	2	31	3.2	0.137065	0.9725	1.04	1.06941	0.863074
1986.1	tr|Q9VJZ1|Q9VJZ1_DROME	CG9302 OS=Drosophila melanogaster GN=CG9302 PE=1 SV=1	1.02	0.96	0.98	0.97	1.02	1.07	0.99	11	7	58	9.5	0.137085	0.9825	1.02667	1.04495	0.863011
1595.1	tr|Q7KU93|Q7KU93_DROME	Liquid facets, isoform C OS=Drosophila melanogaster GN=lqf PE=2 SV=1	1.03	0.93	0.99	0.98	1.04	1.02	1.02	15	10	84	9	0.137085	0.9825	1.02667	1.04495	0.863011
861.1	sp|P46824|KLC_DROME	Kinesin light chain OS=Drosophila melanogaster GN=Klc PE=1 SV=1	0.92	0.97	1.04	0.98	1.03	1.06	1.01	33	15	58	28.4	0.137181	0.9775	1.03333	1.05712	0.862706
3716.1	sp|Q45VV3-2|YORKI_DROME	Isoform 2 of Protein yorkie OS=Drosophila melanogaster GN=yki	1.01	0.89	1.05	0.89	1.08	1.05	1.02	3	3	40	3.7	0.137221	0.96	1.05	1.09375	0.862578
5702.1	tr|Q94545|Q94545_DROME	Absent, small, or homeotic discs 2, isoform C OS=Drosophila melanogaster GN=ash2 PE=2 SV=2	0.98	0.78	0.91	0.94	1.24	1.3	0.85	1	1	63	0.8	0.137248	0.9025	1.13	1.25208	0.862492
891.2	tr|Q86B73|Q86B73_DROME	Darkener of apricot, isoform P OS=Drosophila melanogaster GN=Doa PE=2 SV=2	0.9	0.93	1.06	0.88	1.2	1.05	0.97	22	10	227	4.9	0.137313	0.9425	1.07333	1.13882	0.862289
5045.1	sp|Q9VG94|GSTT6_DROME	Glutathione S-transferase D6 OS=Drosophila melanogaster GN=GstD6 PE=1 SV=1	0.92	0.87	1.13	0.85	1.08	1.08	1.07	1	1	24	2	0.137875	0.9425	1.07667	1.14235	0.860514
4364.1	tr|Q9W384|Q9W384_DROME	DALAO protein OS=Drosophila melanogaster GN=dalao PE=2 SV=1	1.08	0.82	0.98	0.84	1.22	1.1	0.97	2	1	79	1.3	0.137909	0.93	1.09667	1.17921	0.860408
1612.1	tr|Q9VK25|Q9VK25_DROME	GH23180p OS=Drosophila melanogaster GN=Pect PE=2 SV=2	1.02	0.9	1.04	0.9	1.02	1.07	1.05	15	8	44	17	0.137969	0.965	1.04667	1.08463	0.86022
2252.1	sp|P24785|MLE_DROME	Dosage compensation regulator OS=Drosophila melanogaster GN=mle PE=1 SV=2	0.98	0.91	1.04	0.93	1.08	1.1	0.97	9	6	144	3.1	0.137996	0.965	1.05	1.08808	0.860135
5654.1	tr|Q9VT45|Q9VT45_DROME	CG42268, isoform F OS=Drosophila melanogaster GN=CG32046 PE=2 SV=2	1.05	0.91	0.87	0.96	0.98	1.18	1.04	1	1	150	0.3	0.138109	0.9475	1.06667	1.12577	0.859778
2040.1	tr|Q9VU17|Q9VU17_DROME	CG10960, isoform B OS=Drosophila melanogaster GN=CG10960 PE=2 SV=1	0.99	0.89	1.06	0.88	1.04	1.01	1.12	11	5	58	9.4	0.138533	0.955	1.05667	1.10646	0.858446
944.1	tr|E2QCZ8|E2QCZ8_DROME	CG31531, isoform B OS=Drosophila melanogaster GN=CG31531 PE=4 SV=1	1	0.92	1.05	0.89	1.02	1.05	1.06	30	16	149	10.1	0.138606	0.965	1.04333	1.08117	0.858219
213.5	tr|Q9VLI2|Q9VLI2_DROME	CG9463 OS=Drosophila melanogaster GN=CG9463 PE=1 SV=2	0.87	0.91	1.07	0.93	0.98	1.2	1.05	37	12	114	16.2	0.138709	0.945	1.07667	1.13933	0.857896
954.1	tr|Q7JR61|Q7JR61_DROME	Aldehyde dehydrogenase OS=Drosophila melanogaster GN=Aldh-III PE=2 SV=1	0.99	0.9	1.02	0.92	1.03	0.98	1.17	30	11	56	26.9	0.138739	0.9575	1.06	1.10705	0.8578
5023.1	sp|Q9VDD3|SNMP1_DROME	Sensory neuron membrane protein 1 OS=Drosophila melanogaster GN=Snmp1 PE=1 SV=2	0.97	0.94	1.01	0.95	1.13	0.97	1.03	1	1	62	0.8	0.139008	0.9675	1.04333	1.07838	0.85696
2313.1	tr|Q8MYX8|Q8MYX8_DROME	CG31038, isoform C OS=Drosophila melanogaster GN=CG31038-RC PE=2 SV=1	1	0.93	1.04	0.91	1.03	1.08	1.01	9	4	48	9.3	0.1392	0.97	1.04	1.07216	0.856361
3683.1	tr|Q7KW08|Q7KW08_DROME	CG14815, isoform B OS=Drosophila melanogaster GN=EG:63B12.5 PE=2 SV=1	0.9	0.92	1.07	0.96	1.02	1.05	1.06	3	3	63	2.4	0.139256	0.9625	1.04333	1.08398	0.856187
1781.1	tr|Q9VPK3|Q9VPK3_DROME	AT24407p OS=Drosophila melanogaster GN=CG18501 PE=2 SV=3	1.02	0.93	1.01	0.94	1.04	1.08	0.99	13	8	47	13.7	0.139379	0.975	1.03667	1.06325	0.855801
3355.1	tr|Q9VUL8|Q9VUL8_DROME	CG6859 OS=Drosophila melanogaster GN=CG6859 PE=2 SV=1	1.03	0.9	1	0.85	1.19	0.97	1.06	4	3	44	4.6	0.139392	0.945	1.07333	1.1358	0.855764
3282.1	tr|Q9VQX3|Q9VQX3_DROME	HL05328p OS=Drosophila melanogaster GN=lectin-24Db PE=2 SV=1	1.03	0.99	1.03	1.03	0.95	0.94	1.03	4	3	42	4.8	0.139779	1.02	0.973333	0.954248	0.854558
4572.1	tr|A1ZAP4|A1ZAP4_DROME	Fat-spondin, isoform B OS=Drosophila melanogaster GN=fat-spondin PE=4 SV=1	1	0.85	1.06	0.89	1.1	1	1.08	2	1	70	1.4	0.140214	0.95	1.06	1.11579	0.853209
230.1	sp|P91938-2|TRXR1_DROME	Isoform A of Thioredoxin reductase 1, mitochondrial OS=Drosophila melanogaster GN=Trxr-1	1	0.92	1.04	0.93	1.02	1.03	1.05	114	16	53	107.2	0.140278	0.9725	1.03333	1.06255	0.85301
1723.1	tr|Q8T0D3|Q8T0D3_DROME	Dek, isoform B OS=Drosophila melanogaster GN=Dek PE=2 SV=1	0.99	0.95	1.03	0.95	1.04	0.99	1.06	14	6	73	9.7	0.140588	0.98	1.03	1.05102	0.852051
634.1	tr|Q9VHC3|Q9VHC3_DROME	Blistery, isoform A OS=Drosophila melanogaster GN=by PE=2 SV=1	0.97	0.9	1.04	0.98	1.02	1.02	1.07	46	18	79	29	0.140768	0.9725	1.03667	1.06598	0.851497
450.1	sp|O61492|FLOT2_DROME	Flotillin-2 OS=Drosophila melanogaster GN=Flo-2 PE=2 SV=3	1	0.92	1.02	0.95	1.08	1.05	0.98	66	18	48	68.6	0.140768	0.9725	1.03667	1.06598	0.851497
5717.1	tr|A4V3G8|A4V3G8_DROME	Ballchen, isoform B OS=Drosophila melanogaster GN=ball PE=3 SV=1	0.72	0.69	0.94	0.97	1.62	0.76	1.3	1	1	66	0.8	0.140841	0.83	1.22667	1.47791	0.851271
2302.1	tr|Q9VKV9|Q9VKV9_DROME	Methionine aminopeptidase OS=Drosophila melanogaster GN=CG5188 PE=2 SV=2	0.97	0.93	0.95	1.02	1.06	1.11	0.96	9	4	35	12.9	0.140979	0.9675	1.04333	1.07838	0.850845
3573.1	tr|Q9VPX3|Q9VPX3_DROME	CG4749 OS=Drosophila melanogaster GN=CG4749 PE=2 SV=1	0.9	1.09	1.12	1.12	1	0.95	0.81	3	3	58	2.6	0.141	1.0575	0.92	0.869976	0.850781
1134.2	sp|Q6IDD9-2|SARM1_DROME	Isoform B of Sterile alpha and TIR motif-containing protein 1 OS=Drosophila melanogaster GN=Ect4	1.01	0.85	1.04	0.9	1.12	0.97	1.11	24	9	114	10.5	0.141235	0.95	1.06667	1.12281	0.850058
3092.1	tr|Q7JRN6|Q7JRN6_DROME	CG4716, isoform A OS=Drosophila melanogaster GN=CG4716 PE=2 SV=1	0.9	0.85	1.09	0.87	1.06	0.97	1.25	5	3	25	10.1	0.141287	0.9275	1.09333	1.1788	0.849898
1349.2	tr|A1Z7E8|A1Z7E8_DROME	CG8693 OS=Drosophila melanogaster GN=Mal-A4 PE=2 SV=1	0.8	0.79	1.22	0.82	1.13	1.14	1.1	5	3	66	3.8	0.141931	0.9075	1.12333	1.23783	0.847924
3828.1	tr|Q9VTE1|Q9VTE1_DROME	CG32069 OS=Drosophila melanogaster GN=CG32069 PE=2 SV=2	0.84	0.86	0.86	1.11	1.26	0.94	1.12	3	2	9	16.6	0.142083	0.9175	1.10667	1.20618	0.847459
3867.1	tr|Q7K483|Q7K483_DROME	CG7943, isoform A OS=Drosophila melanogaster GN=CG7943 PE=2 SV=1	0.79	0.77	1.11	0.94	1.33	0.94	1.13	3	2	37	4	0.142228	0.9025	1.13333	1.25577	0.847015
711.1	tr|Q7JQH9|Q7JQH9_DROME	LD31742p OS=Drosophila melanogaster GN=whd PE=2 SV=1	1.01	0.92	1.04	0.91	1.09	1.05	1	41	11	89	22.9	0.142595	0.97	1.04667	1.07904	0.845895
2809.1	sp|Q86NP2|NELFA_DROME	Negative elongation factor A OS=Drosophila melanogaster GN=Nelf-A PE=1 SV=2	0.87	0.83	1.04	1.05	1.1	1.11	1.01	6	4	135	2.2	0.142751	0.9475	1.07333	1.13281	0.845422
591.1	tr|A1ZB83|A1ZB83_DROME	CG5174, isoform B OS=Drosophila melanogaster GN=CG5174 PE=4 SV=1	0.97	0.91	1.04	0.96	1.01	1.01	1.11	50	8	39	63.6	0.142781	0.97	1.04333	1.0756	0.845328
1069.1	tr|Q9W3K9|Q9W3K9_DROME	CG2254 OS=Drosophila melanogaster GN=CG2254 PE=2 SV=1	0.97	0.84	1.03	0.83	1.1	0.92	1.31	27	7	36	38	0.1429	0.9175	1.11	1.20981	0.844967
3848.1	tr|Q9W0S6|Q9W0S6_DROME	IP18235p OS=Drosophila melanogaster GN=mRpL17 PE=2 SV=2	0.79	0.93	0.98	1.07	1.14	1.09	1	3	2	21	7.2	0.142908	0.9425	1.07667	1.14235	0.844943
4983.1	tr|Q9VQ86|Q9VQ86_DROME	CG15385 OS=Drosophila melanogaster GN=CG15385 PE=2 SV=1	1.04	1.05	1.13	0.96	0.96	0.85	1.02	1	1	65	0.8	0.142913	1.045	0.943333	0.902711	0.84493
4328.1	tr|B7Z143|B7Z143_DROME	CG11138, isoform D OS=Drosophila melanogaster GN=CG11138 PE=4 SV=1	0.97	0.85	1.05	0.96	1.1	1.1	0.98	2	2	62	1.6	0.143046	0.9575	1.06	1.10705	0.844524
1310.1	tr|A8Y535|A8Y535_DROME	Ubiquinol-cytochrome C reductase complex 11 kDa protein, isoform B OS=Drosophila melanogaster GN=Ucrh PE=4 SV=2	0.89	0.77	1.11	0.95	1.09	1.01	1.17	21	2	10	106.2	0.143058	0.93	1.09	1.17204	0.844489
747.1	sp|P91891|MO25_DROME	Protein Mo25 OS=Drosophila melanogaster GN=Mo25 PE=2 SV=2	0.96	0.95	1.03	0.99	1.03	1.04	1	39	12	39	49.5	0.143061	0.9825	1.02333	1.04156	0.844478
5401.1	tr|Q9VLZ1|Q9VLZ1_DROME	CG7025 OS=Drosophila melanogaster GN=CG7025 PE=1 SV=2	0.97	0.92	1.05	0.86	0.95	1.13	1.13	1	1	48	1	0.143253	0.95	1.07	1.12632	0.843896
3082.1	sp|Q9VX91|UBR1_DROME	E3 ubiquitin-protein ligase UBR1 OS=Drosophila melanogaster GN=UBR1 PE=2 SV=2	0.87	0.93	0.97	1.02	0.98	1.22	1.02	5	3	208	1.2	0.143461	0.9475	1.07333	1.13281	0.843265
1308.1	tr|Q9W077|Q9W077_DROME	Cuticular protein 62Bc OS=Drosophila melanogaster GN=Cpr62Bc PE=2 SV=1	1	0.99	1.05	1.07	1.02	0.9	0.97	21	3	19	56.2	0.143507	1.0275	0.963333	0.937551	0.843125
1394.1	sp|Q9W415|WUHO_DROME	tRNA (guanine-N(7)-)-methyltransferase subunit wuho OS=Drosophila melanogaster GN=wuho PE=2 SV=1	0.91	0.98	1.01	0.99	1.04	1.09	0.98	19	8	46	20.4	0.143507	0.9725	1.03667	1.06598	0.843125
477.1	sp|P46415|ADHX_DROME	Alcohol dehydrogenase class-3 OS=Drosophila melanogaster GN=Fdh PE=1 SV=3	1.04	0.98	1.04	1	0.98	1	0.96	62	8	40	76.8	0.143811	1.015	0.98	0.965517	0.842208
1834.1	tr|Q9VAX9|Q9VAX9_DROME	CG4884 OS=Drosophila melanogaster GN=CG42487-RA PE=2 SV=1	0.98	0.89	1.04	0.94	1.13	1.02	1	13	4	21	30.5	0.143811	0.9625	1.05	1.09091	0.842208
225.1	tr|Q9VTK9|Q9VTK9_DROME	CG6084, isoform A OS=Drosophila melanogaster GN=CG6084 PE=2 SV=2	0.97	0.99	1.02	0.96	1	1.05	1.01	116	15	36	161.6	0.143811	0.985	1.02	1.03553	0.842208
4033.1	sp|Q24451|MAN2_DROME	Alpha-mannosidase 2 OS=Drosophila melanogaster GN=alpha-Man-II PE=1 SV=2	0.89	0.82	0.98	1.09	1.1	1.09	1.02	2	2	127	0.8	0.144016	0.945	1.07	1.13228	0.841589
1979.1	tr|Q9VUC7|Q9VUC7_DROME	LD43687p OS=Drosophila melanogaster GN=pex1 PE=2 SV=1	1.04	1.02	1.02	1.05	1.03	0.98	0.85	11	8	114	4.8	0.144124	1.0325	0.953333	0.923325	0.841264
5083.1	tr|Q9VXM6|Q9VXM6_DROME	CG16952, isoform A OS=Drosophila melanogaster GN=CG16952-RB PE=2 SV=2	1.1	0.82	0.98	0.88	1.11	1.05	1.06	1	1	112	0.5	0.14419	0.945	1.07333	1.1358	0.841066
4618.1	tr|Q9W1R1|Q9W1R1_DROME	GH10609p OS=Drosophila melanogaster GN=yellow-d PE=2 SV=2	1.18	0.8	0.87	0.75	1.15	1.26	0.98	1	1	49	1	0.144296	0.9	1.13	1.25556	0.840746
2952.1	tr|Q9W4F8|Q9W4F8_DROME	CG4041 OS=Drosophila melanogaster GN=CG4041 PE=2 SV=4	1.03	0.91	1.01	0.92	1.07	1.06	0.99	5	5	93	2.7	0.144421	0.9675	1.04	1.07494	0.840369
1675.1	tr|Q9VP77|Q9VP77_DROME	CG10565 OS=Drosophila melanogaster GN=CG10565 PE=2 SV=1	0.93	0.94	1.04	0.99	1.07	1.02	1.01	14	11	74	9.5	0.144544	0.975	1.03333	1.05983	0.84
2262.1	sp|P16554|NUMB_DROME	Protein numb OS=Drosophila melanogaster GN=numb PE=1 SV=2	1.04	0.88	0.94	0.93	1.21	1.01	0.99	9	6	61	7.4	0.144559	0.9475	1.07	1.12929	0.839955
3997.1	tr|Q7K0H4|Q7K0H4_DROME	SD07723p OS=Drosophila melanogaster GN=stj PE=2 SV=1	0.95	1	0.94	0.93	1.18	1.06	0.94	2	2	140	0.7	0.144829	0.955	1.06	1.10995	0.839145
1297.1	tr|Q9VMX4|Q9VMX4_DROME	AT19154p OS=Drosophila melanogaster GN=Scox PE=2 SV=1	1.08	1.02	1.01	0.99	1.02	0.96	0.93	21	5	28	37.3	0.144871	1.025	0.97	0.946341	0.839019
2458.1	sp|Q9VCW1|CP6D4_DROME	Probable cytochrome P450 6d4 OS=Drosophila melanogaster GN=Cyp6d4 PE=2 SV=1	1.01	0.9	1.01	0.95	1.08	1.08	0.97	8	4	59	6.8	0.144895	0.9675	1.04333	1.07838	0.838947
5409.1	tr|A8DZ15|A8DZ15_DROME	CG34171 OS=Drosophila melanogaster GN=CG34171 PE=3 SV=1	1.06	0.9	0.88	1	1.02	1.04	1.1	1	1	32	1.6	0.144956	0.96	1.05333	1.09722	0.838764
1186.1	sp|Q01989|MYS9_DROME	Myosin heavy chain 95F OS=Drosophila melanogaster GN=jar PE=2 SV=3	0.97	0.93	1.04	0.98	1.02	1.03	1.03	23	15	144	8	0.144956	0.98	1.02667	1.04762	0.838764
354.1	sp|Q24583|VATF1_DROME	V-type proton ATPase subunit F 1 OS=Drosophila melanogaster GN=Vha14-1 PE=1 SV=1	0.95	0.96	1.02	0.99	0.99	1.02	1.07	84	3	14	303.4	0.144956	0.98	1.02667	1.04762	0.838764
914.1	tr|A1Z8P9|A1Z8P9_DROME	Megator OS=Drosophila melanogaster GN=Mtor PE=4 SV=1	0.97	0.94	1.04	0.97	1.05	1.02	1.01	31	23	262	5.9	0.144956	0.98	1.02667	1.04762	0.838764
2607.1	sp|Q9V4S8|CSN7_DROME	COP9 signalosome complex subunit 7 OS=Drosophila melanogaster GN=CSN7 PE=1 SV=2	0.99	0.95	1.02	0.96	1.02	0.99	1.07	7	4	31	11.3	0.144956	0.98	1.02667	1.04762	0.838764
1.1	sp|P05661-2|MYSA_DROME	Isoform BDBBA of Myosin heavy chain, muscle OS=Drosophila melanogaster GN=Mhc	0.97	0.92	1.03	1	1.04	1.04	1.01	16366	146	224	3648.7	0.145093	0.98	1.03	1.05102	0.838353
130.1	tr|A1ZBJ2|A1ZBJ2_DROME	CG7461 OS=Drosophila melanogaster GN=CG7461 PE=3 SV=2	1.03	0.94	1.01	0.94	1.02	1.02	1.05	209	20	68	152.9	0.145093	0.98	1.03	1.05102	0.838353
4659.1	sp|Q9VHH7|ADAL_DROME	Adenosine deaminase-like protein OS=Drosophila melanogaster GN=Ada PE=2 SV=1	1.02	0.99	0.87	0.64	1.23	1.39	0.87	1	1	38	1.3	0.14514	0.88	1.16333	1.32197	0.838214
581.1	tr|A8JQV2|A8JQV2_DROME	CG17816, isoform E OS=Drosophila melanogaster GN=CG17816 PE=4 SV=1	0.96	0.93	1.05	0.96	1.08	1.02	1.01	50	18	93	26.8	0.145309	0.975	1.03667	1.06325	0.837707
5641.1	tr|Q8MLU1|Q8MLU1_DROME	CG13502, isoform C OS=Drosophila melanogaster GN=CG13502 PE=1 SV=2	0.36	0.52	1.37	0.48	1.4	2.13	0.75	1	1	52	1	0.14534	0.6825	1.42667	2.09035	0.837614
255.1	tr|Q9VQB4|Q9VQB4_DROME	CG3609 OS=Drosophila melanogaster GN=CG3609 PE=2 SV=1	1.02	0.9	1.05	0.89	1.07	1.05	1.03	105	15	37	140.9	0.145806	0.965	1.05	1.08808	0.836225
2774.1	tr|Q9VFE7|Q9VFE7_DROME	CG7262 OS=Drosophila melanogaster GN=CG7262 PE=2 SV=1	0.89	0.95	1.05	0.99	1.06	1.03	1.03	6	4	91	3.3	0.146098	0.97	1.04	1.07216	0.835356
3162.1	tr|Q9VV13|Q9VV13_DROME	CG13065 OS=Drosophila melanogaster GN=CG13065 PE=2 SV=1	1.09	1.05	0.98	1.17	1.1	0.86	0.75	5	2	14	18.4	0.146117	1.0725	0.903333	0.842269	0.8353
5245.1	tr|Q9VJ25|Q9VJ25_DROME	CG15168 OS=Drosophila melanogaster GN=CG15168 PE=2 SV=1	0.85	0.99	1.09	0.87	1.1	1.06	1.04	1	1	12	4	0.146189	0.95	1.06667	1.12281	0.835085
1559.1	tr|Q9W1I8|Q9W1I8_DROME	Synaptosomal-associated protein OS=Drosophila melanogaster GN=usnp PE=2 SV=1	0.9	0.95	1.04	0.96	1.12	1.08	0.96	16	7	32	25.3	0.146311	0.9625	1.05333	1.09437	0.834723
5599.1	tr|Q9W2I6|Q9W2I6_DROME	CG10069, isoform A OS=Drosophila melanogaster GN=CG10069 PE=2 SV=3	1.05	1.02	0.93	0.75	1.09	1.14	1.02	1	1	58	0.9	0.146911	0.9375	1.08333	1.15556	0.832946
3898.1	tr|Q5LJX7|Q5LJX7_DROME	CG2893, isoform D OS=Drosophila melanogaster GN=CG2893-RD PE=2 SV=1	0.85	0.99	0.98	0.98	1.1	0.94	1.15	3	2	50	3	0.147158	0.95	1.06333	1.1193	0.832216
4052.1	tr|Q9VN58|Q9VN58_DROME	CG42574 OS=Drosophila melanogaster GN=CG42574 PE=4 SV=4	1.01	0.92	1	0.91	1.08	1.13	0.95	2	2	336	0.3	0.147521	0.96	1.05333	1.09722	0.831146
410.1	tr|Q8IQ87|Q8IQ87_DROME	CG32377 OS=Drosophila melanogaster GN=Ank2 PE=2 SV=1	0.92	0.85	1.08	0.94	1.16	0.97	1.09	72	31	1008	3.6	0.147702	0.9475	1.07333	1.13281	0.830615
4429.1	tr|Q9VCV1|Q9VCV1_DROME	CG6982, isoform B OS=Drosophila melanogaster GN=CG6982 PE=2 SV=1	0.8	0.86	1.14	0.89	1.24	1.02	1.05	2	1	23	4.4	0.147763	0.9225	1.10333	1.19603	0.830434
4674.1	tr|Q8INX1|Q8INX1_DROME	CG31800 OS=Drosophila melanogaster GN=CG31800 PE=2 SV=1	0.98	0.99	1.06	1.07	0.92	1	0.98	1	1	21	2.4	0.147828	1.025	0.966667	0.943089	0.830244
604.1	sp|P08120|CO4A1_DROME	Collagen alpha-1(IV) chain OS=Drosophila melanogaster GN=Cg25C PE=2 SV=3	1.03	0.95	0.95	0.98	1.05	1.06	0.98	49	5	174	14.1	0.147868	0.9775	1.03	1.05371	0.830126
4127.1	tr|Q9VEV7|Q9VEV7_DROME	CG17565 OS=Drosophila melanogaster GN=CG17565 PE=2 SV=1	1.01	1.06	0.99	1.03	1.03	0.94	0.94	2	2	47	2.1	0.147868	1.0225	0.97	0.948655	0.830126
2547.1	tr|Q0E9E6|Q0E9E6_DROME	CG34141, isoform B OS=Drosophila melanogaster GN=CG34141 PE=2 SV=2	0.9	0.85	1.05	1.02	1.06	1.11	1.01	7	6	82	4.3	0.147868	0.955	1.06	1.10995	0.830126
1944.1	sp|Q9NFZ3|GBGE_DROME	Guanine nucleotide-binding protein subunit gamma-e OS=Drosophila melanogaster GN=Ggamma30A PE=1 SV=1	0.89	0.95	1.07	0.94	1.05	1	1.1	12	4	8	71.5	0.148191	0.9625	1.05	1.09091	0.829178
62.2	tr|A8JRC2|A8JRC2_DROME	CG5028, isoform E OS=Drosophila melanogaster GN=CG5028 PE=3 SV=1	0.98	0.89	1.05	0.96	1.06	1.01	1.05	432	13	38	573.5	0.148372	0.97	1.04	1.07216	0.828647
3685.1	tr|Q9VM10|Q9VM10_DROME	Scavenger receptor acting in neural tissue and majority of rhodopsin is absent, isoform A OS=Drosophila melanogaster GN=santa-maria PE=2 SV=2	1.04	0.93	0.98	0.93	1.09	0.98	1.05	3	3	63	2.4	0.148372	0.97	1.04	1.07216	0.828647
2813.1	tr|Q9VPD3|Q9VPD3_DROME	CG4825 OS=Drosophila melanogaster GN=CG4825 PE=2 SV=1	0.82	1.03	0.99	0.97	1.08	1.14	0.98	6	4	57	5.3	0.148533	0.9525	1.06667	1.11986	0.828178
4374.1	tr|Q7JZI2|Q7JZI2_DROME	RE29825p OS=Drosophila melanogaster GN=Tsp74F PE=2 SV=1	0.93	0.86	0.97	1.05	1.14	1.09	0.96	2	1	26	3.8	0.148561	0.9525	1.06333	1.11636	0.828095
1346.1	tr|Q0E908|Q0E908_DROME	Hillarin, isoform A OS=Drosophila melanogaster GN=Hil PE=2 SV=1	0.95	0.93	1.06	0.89	1.07	1.13	0.97	20	8	94	10.6	0.148608	0.9575	1.05667	1.10357	0.827958
5258.1	tr|Q9VDK2|Q9VDK2_DROME	CG5466 OS=Drosophila melanogaster GN=CG5466 PE=2 SV=2	1	0.84	0.9	0.88	1.32	1.21	0.84	1	1	63	0.8	0.148695	0.905	1.12333	1.24125	0.827703
3529.1	tr|Q9VE08|Q9VE08_DROME	CG6013 OS=Drosophila melanogaster GN=CG6013 PE=2 SV=1	0.96	0.9	1.06	0.86	1.2	1.04	0.98	4	1	25	8.1	0.148935	0.945	1.07333	1.1358	0.827005
4468.1	sp|Q9VCE1|BECN1_DROME	Beclin-1-like protein OS=Drosophila melanogaster GN=Atg6 PE=1 SV=1	1.07	0.89	0.92	0.88	1.2	1.1	0.94	2	1	49	2	0.148939	0.94	1.08	1.14894	0.826991
15.1	tr|A8DYP0|A8DYP0_DROME	Unc-89, isoform C OS=Drosophila melanogaster GN=Unc-89 PE=4 SV=1	0.96	0.94	1.02	0.99	1.06	1.04	0.98	1672	161	475	175.9	0.149236	0.9775	1.02667	1.0503	0.826127
2121.1	tr|Q9VPC1|Q9VPC1_DROME	CG4042 OS=Drosophila melanogaster GN=CG4042-RA PE=2 SV=1	0.97	1.03	1.07	1.1	1	1	0.82	10	6	33	15.2	0.149426	1.0425	0.94	0.901679	0.825573
1432.1	sp|P55162|HEM_DROME	Membrane-associated protein Hem OS=Drosophila melanogaster GN=Hem PE=2 SV=1	0.96	0.91	1.07	0.91	1.09	1.07	0.99	18	12	129	7	0.149641	0.9625	1.05	1.09091	0.82495
1772.1	tr|Q7KRZ3|Q7KRZ3_DROME	Exo84, isoform B OS=Drosophila melanogaster GN=exo84 PE=2 SV=1	0.97	0.98	1.02	0.96	1.04	1.05	0.98	13	10	77	8.5	0.149759	0.9825	1.02333	1.04156	0.824607
3878.1	tr|E1JIL5|E1JIL5_DROME	Mitochondrial ribosomal protein S10, isoform D OS=Drosophila melanogaster GN=mRpS10 PE=4 SV=1	1.04	1.11	0.98	1.14	1.05	0.96	0.72	3	2	17	8.7	0.150105	1.0675	0.91	0.852459	0.823604
1665.2	tr|O97061|O97061_DROME	Ccp84Ad OS=Drosophila melanogaster GN=Ccp84Ad PE=2 SV=1	0.96	1.23	0.95	1.12	0.94	0.98	0.82	5	3	21	12	0.150221	1.065	0.913333	0.85759	0.82327
213.3	tr|Q9VLI0|Q9VLI0_DROME	CG9466 OS=Drosophila melanogaster GN=CG9466 PE=2 SV=1	0.92	0.94	1	0.95	0.97	1.21	1.01	109	20	112	48.8	0.150366	0.9525	1.06333	1.11636	0.822851
927.1	tr|Q9VK12|Q9VK12_DROME	CG5945 OS=Drosophila melanogaster GN=CG5945 PE=2 SV=1	1.02	0.95	1	0.89	1.06	0.97	1.12	31	10	28	54.4	0.150424	0.965	1.05	1.08808	0.822683
2794.1	tr|Q9VMU2|Q9VMU2_DROME	CG5828 OS=Drosophila melanogaster GN=CG5828 PE=1 SV=1	1.02	0.88	1.02	0.91	1.1	0.96	1.12	6	4	40	7.4	0.15048	0.9575	1.06	1.10705	0.82252
4718.1	tr|Q9VDQ3|Q9VDQ3_DROME	CG4936 OS=Drosophila melanogaster GN=CG4936 PE=2 SV=1	0.9	0.8	1.14	0.91	1.06	1.11	1.08	1	1	59	0.8	0.150566	0.9375	1.08333	1.15556	0.822273
1752.1	tr|Q9VJ59|Q9VJ59_DROME	CG10373 OS=Drosophila melanogaster GN=CG10373 PE=1 SV=3	1.04	0.94	0.97	0.92	1.07	1.08	0.97	14	3	28	25.2	0.150777	0.9675	1.04	1.07494	0.821665
4353.1	sp|Q95T12|FLOWR_DROME	Calcium channel flower OS=Drosophila melanogaster GN=fwe PE=1 SV=1	0.83	0.95	0.96	0.99	0.99	1.28	0.99	2	1	21	4.8	0.150924	0.9325	1.08667	1.16533	0.82124
3451.1	tr|Q8I941|Q8I941_DROME	CG32485 OS=Drosophila melanogaster GN=CG32485 PE=2 SV=1	0.91	0.96	1.04	0.93	1.14	1.06	0.96	4	2	26	7.7	0.151339	0.96	1.05333	1.09722	0.820049
1592.1	sp|P35220|CTNA_DROME	Catenin alpha OS=Drosophila melanogaster GN=alpha-Cat PE=1 SV=2	0.92	0.94	1.03	1.02	1.04	1.03	1.03	15	10	102	7.3	0.151577	0.9775	1.03333	1.05712	0.819367
28.1	sp|Q94920|VDAC_DROME	Voltage-dependent anion-selective channel OS=Drosophila melanogaster GN=porin PE=1 SV=3	1.01	0.9	1.02	0.98	1.03	1.05	1.02	1052	18	31	1722.8	0.151577	0.9775	1.03333	1.05712	0.819367
2319.1	tr|A1ZBU5|A1ZBU5_DROME	CG13422 OS=Drosophila melanogaster GN=CG13422 PE=4 SV=1	1	0.82	1.09	0.84	1.14	1.12	0.99	9	3	17	26.3	0.151604	0.9375	1.08333	1.15556	0.819288
4398.1	tr|Q9W4C1|Q9W4C1_DROME	CG15784 OS=Drosophila melanogaster GN=CG15784 PE=2 SV=1	0.99	0.86	1.03	0.95	0.97	1.07	1.12	2	1	62	1.6	0.151699	0.9575	1.05333	1.10009	0.819018
165.1	tr|Q9VMD9|Q9VMD9_DROME	Tiggrin OS=Drosophila melanogaster GN=Tig PE=1 SV=2	1.06	0.87	1.01	0.89	1.09	1.04	1.03	164	59	257	31.9	0.151699	0.9575	1.05333	1.10009	0.819018
2434.1	tr|Q86BR9|Q86BR9_DROME	Gilgamesh, isoform B OS=Drosophila melanogaster GN=gish PE=2 SV=2	1.02	0.83	1.05	0.86	1.13	0.96	1.15	8	5	53	7.6	0.151761	0.94	1.08	1.14894	0.81884
2157.1	tr|A8DYE4|A8DYE4_DROME	CG34365, isoform F OS=Drosophila melanogaster GN=CG34365 PE=4 SV=1	1	0.89	1	0.86	1.22	1.08	0.93	10	5	113	4.4	0.151874	0.9375	1.07667	1.14844	0.818517
1435.2	tr|Q961D3|Q961D3_DROME	CG11897, isoform A OS=Drosophila melanogaster GN=CG11897 PE=2 SV=1	0.98	0.83	1.08	0.93	1.07	1.04	1.07	8	6	155	2.6	0.151886	0.955	1.06	1.10995	0.818482
4118.1	sp|Q8IFW4|THIOT_DROME	Thioredoxin-T OS=Drosophila melanogaster GN=TrxT PE=1 SV=1	0.8	0.73	1.14	0.88	0.92	1.39	1.14	2	2	17	5.7	0.151886	0.8875	1.15	1.29577	0.818482
1858.1	tr|Q9VDJ8|Q9VDJ8_DROME	Cuticular protein 92F OS=Drosophila melanogaster GN=Cpr92F PE=1 SV=1	0.91	0.89	0.99	1.07	1.06	1.07	1.02	13	2	40	16.3	0.151952	0.965	1.05	1.08808	0.818294
2531.1	tr|Q9VUY1|Q9VUY1_DROME	CG5284, isoform A OS=Drosophila melanogaster GN=ClC-c PE=2 SV=3	0.86	0.93	1.09	0.95	1.09	1.04	1.04	7	7	95	3.7	0.151983	0.9575	1.05667	1.10357	0.818205
3123.1	tr|E1JIQ1|E1JIQ1_DROME	GluClalpha, isoform G OS=Drosophila melanogaster GN=GluClalpha PE=3 SV=1	0.88	0.94	1.07	0.86	0.99	1.23	1.02	5	3	52	4.8	0.152185	0.9375	1.08	1.152	0.817628
5043.1	sp|Q9VI82|NOC3L_DROME	Nucleolar complex protein 3 homolog OS=Drosophila melanogaster GN=CG1234 PE=1 SV=1	0.98	0.91	1.02	0.98	1	1.01	1.09	1	1	94	0.5	0.15235	0.9725	1.03333	1.06255	0.817157
3667.1	tr|Q8IM86|Q8IM86_DROME	Unc-13, isoform B OS=Drosophila melanogaster GN=unc-13 PE=2 SV=1	1	0.9	0.95	1	1.05	1.13	0.96	3	3	360	0.4	0.152458	0.9625	1.04667	1.08745	0.816851
5452.1	tr|Q9VCL5|Q9VCL5_DROME	CG10170 OS=Drosophila melanogaster GN=CG10170-RA PE=2 SV=1	1.08	0.87	0.95	0.92	0.99	1.14	1.06	1	1	62	0.8	0.152504	0.955	1.06333	1.11344	0.816719
1316.1	tr|Q0E8J1|Q0E8J1_DROME	CG33232, isoform B OS=Drosophila melanogaster GN=CG33232 PE=2 SV=1	1.06	0.94	1.12	1.03	0.96	1	0.89	20	13	131	7.6	0.152525	1.0375	0.95	0.915663	0.816658
2733.1	tr|Q9VML2|Q9VML2_DROME	Blue cheese OS=Drosophila melanogaster GN=bchs PE=2 SV=4	0.98	0.86	1.07	0.93	1.08	1.01	1.07	6	6	390	0.8	0.152604	0.96	1.05333	1.09722	0.816434
4513.1	tr|Q4V5G0|Q4V5G0_DROME	CG15412 OS=Drosophila melanogaster GN=CG15412 PE=2 SV=1	0.95	0.9	1.08	0.9	1	1.05	1.11	2	1	54	1.9	0.152897	0.9575	1.05333	1.10009	0.8156
2730.1	sp|P91875|RPA1_DROME	DNA-directed RNA polymerase I subunit RPA1 OS=Drosophila melanogaster GN=RpI1 PE=1 SV=2	0.99	0.88	1.01	0.98	1.11	1.06	0.97	6	6	185	1.6	0.153068	0.965	1.04667	1.08463	0.815117
2628.1	tr|Q9VZE4|Q9VZE4_DROME	CG1316 OS=Drosophila melanogaster GN=CG1316 PE=2 SV=2	0.92	0.92	1.07	0.92	1.05	1.14	0.98	7	4	52	6.7	0.153102	0.9575	1.05667	1.10357	0.81502
498.2	sp|P47948|TNNC2_DROME	Troponin C, isoform 2 OS=Drosophila melanogaster GN=TpnC47D PE=1 SV=2	0.94	0.93	1.04	0.95	1.1	1.07	0.96	9	3	18	25.2	0.153181	0.965	1.04333	1.08117	0.814796
1220.1	tr|Q9VSY0|Q9VSY0_DROME	Cuticular protein 67B OS=Drosophila melanogaster GN=Cpr67B PE=2 SV=1	1.03	0.97	0.95	0.96	1.06	0.98	1.04	23	5	30	38.6	0.153799	0.9775	1.02667	1.0503	0.813048
5741.1	sp|Q9VS24-3|MELT_DROME	Isoform C of Protein melted OS=Drosophila melanogaster GN=melt	0.68	1.34	0.68	0.65	1.13	1.47	1.05	1	1	108	0.5	0.153841	0.8375	1.21667	1.45274	0.812927
423.1	tr|Q9I7R0|Q9I7R0_DROME	CG18815, isoform A OS=Drosophila melanogaster GN=CG18815 PE=2 SV=1	0.97	0.91	1.06	0.93	1.04	1.01	1.06	71	7	23	153.4	0.153939	0.9675	1.03667	1.07149	0.81265
2155.1	tr|Q9Y102|Q9Y102_DROME	BcDNA.GH11973 OS=Drosophila melanogaster GN=rgn PE=2 SV=1	0.92	0.88	1.07	0.94	1.17	1.01	1.01	10	5	97	5.1	0.153952	0.9525	1.06333	1.11636	0.812615
4050.1	sp|Q9VFG8|KIBRA_DROME	Protein kibra OS=Drosophila melanogaster GN=kibra PE=1 SV=2	0.94	0.89	1.09	0.93	1.05	1.06	1.04	2	2	144	0.7	0.15396	0.9625	1.05	1.09091	0.812593
3488.1	tr|Q0E8P1|Q0E8P1_DROME	CG17549, isoform B OS=Drosophila melanogaster GN=CG17549 PE=4 SV=1	0.96	0.9	1.06	0.97	1.06	1.04	1.02	4	2	27	7.5	0.154248	0.9725	1.04	1.06941	0.811779
5052.1	tr|Q9VT19|Q9VT19_DROME	CG3335 OS=Drosophila melanogaster GN=CG3335 PE=2 SV=1	1.2	1.12	1.13	0.95	1.01	0.57	1.02	1	1	104	0.5	0.154318	1.1	0.866667	0.787879	0.811584
4138.1	tr|Q9VKW8|Q9VKW8_DROME	CG17768 OS=Drosophila melanogaster GN=LSm-4-RB PE=2 SV=3	1.02	0.96	0.98	0.94	1.1	0.99	1.01	2	2	17	5.9	0.154318	0.975	1.03333	1.05983	0.811584
1825.1	tr|Q9W0B3|Q9W0B3_DROME	CG7967 OS=Drosophila melanogaster GN=CG7967 PE=2 SV=1	1.06	1.02	1.04	0.98	0.99	0.9	1.01	13	5	34	18.9	0.154318	1.025	0.966667	0.943089	0.811584
2661.1	tr|Q9VMQ6|Q9VMQ6_DROME	CG31648 OS=Drosophila melanogaster GN=CG31648 PE=2 SV=2	1.08	0.99	1.03	1.04	0.96	1.04	0.86	7	3	27	12.8	0.154712	1.035	0.953333	0.921095	0.810477
2273.1	tr|Q9W3R8|Q9W3R8_DROME	CG2059 OS=Drosophila melanogaster GN=CG2059 PE=2 SV=1	0.98	0.89	1.05	0.94	1.08	0.98	1.08	9	5	35	12.7	0.154712	0.965	1.04667	1.08463	0.810477
5376.1	tr|B7Z092|B7Z092_DROME	CG12983, isoform D OS=Drosophila melanogaster GN=CG12983 PE=4 SV=1	0.82	0.83	1	0.99	0.92	1.38	1.07	1	1	128	0.4	0.154818	0.91	1.12333	1.23443	0.81018
1582.1	sp|Q8INB9-2|AKT1_DROME	Isoform A of RAC serine/threonine-protein kinase OS=Drosophila melanogaster GN=Akt1	0.96	0.9	1.01	1.01	1.08	1.03	0.99	16	5	60	13.4	0.154955	0.97	1.03333	1.06529	0.809795
3339.1	tr|Q9VHI9|Q9VHI9_DROME	CG31100 OS=Drosophila melanogaster GN=CG31100 PE=2 SV=2	1.02	0.85	1.02	0.91	1.16	1.08	0.96	4	3	79	2.5	0.155122	0.95	1.06667	1.12281	0.809328
2231.1	tr|Q9VJN0|Q9VJN0_DROME	CG31821 OS=Drosophila melanogaster GN=CG31821 PE=2 SV=2	0.97	0.96	1.05	0.9	1.05	1.09	0.99	9	6	48	9.4	0.155163	0.97	1.04333	1.0756	0.809212
1581.1	tr|Q9VTD6|Q9VTD6_DROME	CG6327, isoform A OS=Drosophila melanogaster GN=CG6327-RA PE=2 SV=1	0.98	0.88	1.08	0.89	1.1	1.06	1.01	16	5	55	14.4	0.15533	0.9575	1.05667	1.10357	0.808745
394.1	tr|Q9VQR2|Q9VQR2_DROME	CG8844 protein OS=Drosophila melanogaster GN=Pdsw PE=2 SV=1	0.92	0.85	1.08	0.94	1.12	0.96	1.13	75	7	19	198.3	0.155622	0.9475	1.07	1.12929	0.807929
3799.1	tr|Q9VZD9|Q9VZD9_DROME	CG32250 OS=Drosophila melanogaster GN=CG32250 PE=2 SV=2	0.96	0.93	1.06	0.87	1.14	0.98	1.05	3	2	34	4.4	0.155785	0.955	1.05667	1.10646	0.807475
2731.1	sp|Q9VVG4|EXOC1_DROME	Exocyst complex component 1 OS=Drosophila melanogaster GN=sec3 PE=1 SV=2	0.95	0.89	1.04	1	1.01	1.05	1.05	6	6	103	2.9	0.155874	0.97	1.03667	1.06873	0.807227
1768.1	tr|Q9W3D2|Q9W3D2_DROME	Calmodulin-binding protein related to a Rab3 GDP/GTP exchange protein, isoform B OS=Drosophila melanogaster GN=Crag PE=2 SV=3	0.99	0.93	1.03	0.98	1.02	1.03	1.02	13	11	184	3.5	0.156349	0.9825	1.02333	1.04156	0.805905
997.2	sp|Q9V4T5|CP4E1_DROME	Probable cytochrome P450 4e1 OS=Drosophila melanogaster GN=Cyp4e1 PE=2 SV=1	1.01	0.89	1.02	0.95	1	1.02	1.11	12	4	61	9.8	0.156426	0.9675	1.04333	1.07838	0.80569
1523.1	sp|P48159|RL23_DROME	60S ribosomal protein L23 OS=Drosophila melanogaster GN=RpL23 PE=1 SV=2	1.06	0.97	1.06	1.1	0.98	1.03	0.81	17	5	15	56.9	0.156532	1.0475	0.94	0.897375	0.805397
62.1	tr|A8JRC1|A8JRC1_DROME	CG5028, isoform D OS=Drosophila melanogaster GN=CG5028 PE=3 SV=1	0.99	0.89	1.05	0.96	1.06	1.02	1.04	517	17	43	596.2	0.156646	0.9725	1.04	1.06941	0.805082
1414.1	tr|O18399|O18399_DROME	EG:152A3.5 protein (Fbgn0003116;pn protein) OS=Drosophila melanogaster GN=pn PE=2 SV=1	0.96	0.87	1.05	0.97	1.12	1.01	1.02	19	5	45	21	0.156813	0.9625	1.05	1.09091	0.804617
661.1	tr|Q9VH91|Q9VH91_DROME	CG31352, isoform A OS=Drosophila melanogaster GN=Unc-115b PE=2 SV=4	1	0.91	1.04	0.94	1.07	1	1.04	44	11	90	24.6	0.156943	0.9725	1.03667	1.06598	0.804259
230.2	sp|Q9VNT5|TRXR2_DROME	Thioredoxin reductase 2, mitochondrial OS=Drosophila melanogaster GN=Trxr-2 PE=1 SV=1	1.02	0.92	1	0.95	0.99	1.1	1.02	24	3	56	21.3	0.156943	0.9725	1.03667	1.06598	0.804259
9.1	tr|A4V1N8|A4V1N8_DROME	FI03688p OS=Drosophila melanogaster GN=Prm PE=2 SV=1	1	0.89	1.04	0.96	1.05	1.04	1.02	2234	70	102	1092.1	0.156943	0.9725	1.03667	1.06598	0.804259
2072.1	tr|Q9VKQ5|Q9VKQ5_DROME	CG17124, isoform A OS=Drosophila melanogaster GN=CG17124 PE=2 SV=1	1.01	1	1.08	1.02	1.02	0.98	0.89	11	2	15	37.7	0.156943	1.0275	0.963333	0.937551	0.804259
4664.1	tr|Q9VBU2|Q9VBU2_DROME	CG11859 OS=Drosophila melanogaster GN=CG11859 PE=2 SV=1	1.1	0.98	0.83	0.88	1.02	1.1	1.09	1	1	61	0.8	0.157074	0.9475	1.07	1.12929	0.803894
3634.1	sp|Q9VFB7|TPC10_DROME	Trafficking protein particle complex subunit 10 OS=Drosophila melanogaster GN=CG6623 PE=2 SV=1	0.92	0.88	1.1	0.89	1.16	0.99	1.06	3	3	131	1.1	0.157074	0.9475	1.07	1.12929	0.803894
1029.1	tr|Q9W426|Q9W426_DROME	CG14445, isoform A OS=Drosophila melanogaster GN=CG14445 PE=1 SV=2	0.99	1.01	0.98	0.97	1.04	1.04	0.98	28	9	37	37.7	0.157267	0.9875	1.02	1.03291	0.803361
1803.1	tr|Q9VRM5|Q9VRM5_DROME	FI04596p OS=Drosophila melanogaster GN=Msr-110 PE=2 SV=1	1.03	0.91	0.98	0.96	1.09	1.06	0.97	13	7	70	9.2	0.157346	0.97	1.04	1.07216	0.803144
5104.1	sp|Q95NH6|ATTC_DROME	Attacin-C OS=Drosophila melanogaster GN=AttC PE=1 SV=1	0.72	0.67	0.73	0.55	2.46	1.32	0.55	1	1	26	2	0.157361	0.6675	1.44333	2.1623	0.803102
1007.1	tr|Q9VGS3|Q9VGS3_DROME	RH44771p OS=Drosophila melanogaster GN=SdhC PE=2 SV=2	0.98	0.99	1.1	1.03	1	0.95	0.95	29	4	19	78.3	0.157524	1.025	0.966667	0.943089	0.802654
109.1	tr|A8JNM7|A8JNM7_DROME	Ank2, isoform F OS=Drosophila melanogaster GN=Ank2 PE=4 SV=1	0.99	0.92	1.04	0.95	1.07	1.03	1	257	78	452	28.4	0.157524	0.975	1.03333	1.05983	0.802654
4469.1	tr|Q9VTS3|Q9VTS3_DROME	Grip163 OS=Drosophila melanogaster GN=Grip163 PE=2 SV=2	0.88	0.82	1.07	0.98	0.95	1.12	1.17	2	1	155	0.7	0.157571	0.9375	1.08	1.152	0.802523
3569.1	sp|Q24564|MERH_DROME	Moesin/ezrin/radixin homolog 2 OS=Drosophila melanogaster GN=Mer PE=1 SV=1	0.95	0.89	0.92	1.08	1	1.05	1.11	3	3	74	2	0.157623	0.96	1.05333	1.09722	0.802379
1441.1	tr|Q9VZF1|Q9VZF1_DROME	CG1309 OS=Drosophila melanogaster GN=CG1309 PE=2 SV=1	1	0.99	1.01	0.94	1.04	1.04	0.99	18	9	58	15.4	0.157656	0.985	1.02333	1.03892	0.802289
493.1	sp|P02283|H2B_DROME	Histone H2B OS=Drosophila melanogaster GN=His2B PE=1 SV=2	0.98	0.97	0.99	1	1.07	0.98	1.02	61	5	14	222.8	0.157656	0.985	1.02333	1.03892	0.802289
2816.1	tr|Q9VSW4|Q9VSW4_DROME	CG4447 OS=Drosophila melanogaster GN=CG4447-RA PE=2 SV=1	0.96	0.86	1.01	1	1.02	1.17	0.99	6	4	28	10.5	0.157781	0.9575	1.06	1.10705	0.801944
3877.1	tr|Q9VKQ0|Q9VKQ0_DROME	CG31869, isoform A OS=Drosophila melanogaster GN=CG31869 PE=2 SV=2	1.04	0.95	0.99	0.86	1	1.12	1.03	3	2	82	1.8	0.157839	0.96	1.05	1.09375	0.801786
3593.1	tr|Q9W1B3|Q9W1B3_DROME	CG10339 OS=Drosophila melanogaster GN=CG10339 PE=1 SV=1	0.97	0.98	1.03	0.87	1.11	1.07	0.97	3	3	68	2.2	0.158232	0.9625	1.05	1.09091	0.800704
762.1	sp|Q9W0Y6|PAIN_DROME	Transient receptor potential cation channel protein painless OS=Drosophila melanogaster GN=pain PE=1 SV=1	1	0.9	1.03	0.96	1.07	1.02	1.01	38	18	103	18.4	0.158255	0.9725	1.03333	1.06255	0.800642
1683.1	sp|Q9W4E2|NBEA_DROME	Neurobeachin OS=Drosophila melanogaster GN=rg PE=1 SV=2	0.98	0.81	1.09	0.9	1.15	1.04	1.03	14	10	396	1.8	0.158262	0.945	1.07333	1.1358	0.800624
185.1	tr|Q9VW68|Q9VW68_DROME	CG7433, isoform A OS=Drosophila melanogaster GN=CG7433 PE=2 SV=1	1.02	0.96	1	0.94	1.06	0.98	1.05	150	20	55	137.5	0.158321	0.98	1.03	1.05102	0.800461
4125.1	tr|Q9VDX5|Q9VDX5_DROME	CG3739 OS=Drosophila melanogaster GN=CG3739 PE=2 SV=1	1.01	0.68	1.13	0.73	1.06	1.37	1.02	2	2	61	1.6	0.15839	0.8875	1.15	1.29577	0.800273
435.1	tr|Q9VE75|Q9VE75_DROME	Vha100-2, isoform A OS=Drosophila melanogaster GN=Vha100-2 PE=2 SV=2	0.94	0.98	0.99	1.01	1	1.07	1	69	15	95	36.4	0.158552	0.98	1.02333	1.04422	0.799829
611.1	tr|Q9VUK8|Q9VUK8_DROME	Glycyl-tRNA synthetase, isoform B OS=Drosophila melanogaster GN=Aats-gly PE=2 SV=1	0.96	0.92	1.05	0.98	1.05	1.04	1.01	48	13	85	28.2	0.15859	0.9775	1.03333	1.05712	0.799723
1633.1	tr|Q9VQD8|Q9VQD8_DROME	Actin-related protein 2/3 complex subunit 5 OS=Drosophila melanogaster GN=p16-ARC PE=2 SV=1	0.98	0.91	1.02	0.94	1.12	1.07	0.95	15	6	17	45	0.158623	0.9625	1.04667	1.08745	0.799633
5053.1	sp|Q9VYF2|IMPA3_DROME	Putative inositol monophosphatase 3 OS=Drosophila melanogaster GN=CG15743 PE=2 SV=1	1.09	0.84	0.93	0.96	1.08	1.08	1.02	1	1	39	1.3	0.158822	0.955	1.06	1.10995	0.799089
595.1	tr|Q9VF24|Q9VF24_DROME	CG31150 OS=Drosophila melanogaster GN=CG9622 PE=2 SV=2	0.96	0.88	1.06	0.94	1.06	0.98	1.11	49	22	168	14.6	0.159177	0.96	1.05	1.09375	0.79812
5583.1	tr|A1ZB86|A1ZB86_DROME	Scruin like at the midline, isoform B OS=Drosophila melanogaster GN=slim PE=4 SV=1	0.84	0.91	1.11	0.79	1.32	0.97	1.05	1	1	72	0.7	0.15926	0.9125	1.11333	1.22009	0.797893
2316.1	tr|Q7KUT5|Q7KUT5_DROME	CG15881, isoform B OS=Drosophila melanogaster GN=CG15881 PE=2 SV=1	0.93	0.93	1.08	0.87	1.16	1.03	1	9	4	14	32.3	0.159271	0.9525	1.06333	1.11636	0.797864
2250.1	tr|Q95RG8|Q95RG8_DROME	Git OS=Drosophila melanogaster GN=Git PE=2 SV=1	1	0.9	1.04	0.94	1.09	1.02	1.01	9	6	81	5.6	0.159558	0.97	1.04	1.07216	0.797081
1784.1	tr|Q7KJA9|Q7KJA9_DROME	O-glycosyltransferase OS=Drosophila melanogaster GN=sxc PE=2 SV=1	0.93	0.95	0.99	1.01	1.03	1.12	0.97	13	8	119	5.5	0.159558	0.97	1.04	1.07216	0.797081
4323.1	tr|Q9VD05|Q9VD05_DROME	CG34376, isoform A OS=Drosophila melanogaster GN=CG31160 PE=2 SV=2	1.05	0.92	0.93	0.96	1.13	1.01	1	2	2	73	1.4	0.159603	0.965	1.04667	1.08463	0.796959
2863.1	tr|Q7K3P0|Q7K3P0_DROME	CG8257 OS=Drosophila melanogaster GN=CG8257 PE=2 SV=1	0.97	0.9	0.96	1.02	1.07	1.13	0.95	6	3	63	4.7	0.159646	0.9625	1.05	1.09091	0.796841
481.1	tr|Q9W347|Q9W347_DROME	C12.2 OS=Drosophila melanogaster GN=c12.2 PE=4 SV=3	1.02	0.87	1.06	0.87	1.11	1.01	1.06	61	28	156	19.6	0.159803	0.955	1.06	1.10995	0.796415
1935.1	tr|Q9V3N6|Q9V3N6_DROME	GH02822p OS=Drosophila melanogaster GN=TM9SF4 PE=2 SV=1	0.96	0.96	1	1	1.04	1.07	0.97	12	4	72	8.3	0.160109	0.98	1.02667	1.04762	0.795584
1875.1	tr|Q86BI3|Q86BI3_DROME	Zn72D, isoform B OS=Drosophila melanogaster GN=Zn72D PE=2 SV=1	0.95	0.89	1.04	0.99	1.08	1.07	0.98	12	8	96	6.2	0.160197	0.9675	1.04333	1.07838	0.795345
3911.1	tr|Q9VBU5|Q9VBU5_DROME	CG10425 OS=Drosophila melanogaster GN=CG10425 PE=2 SV=1	0.99	0.91	1.03	0.97	1.01	1.08	1.01	3	1	37	4.1	0.160703	0.975	1.03333	1.05983	0.793975
213.1	tr|Q9VKV1|Q9VKV1_DROME	BcDNA.GH02419 OS=Drosophila melanogaster GN=BcDNA.GH02419 PE=2 SV=2	0.97	0.93	1.06	0.92	1.03	1.01	1.07	126	28	123	51.4	0.160753	0.97	1.03667	1.06873	0.793841
233.1	tr|Q9VT55|Q9VT55_DROME	CG32050 OS=Drosophila melanogaster GN=CG32050 PE=2 SV=2	1.07	0.9	1	0.85	1.02	1.04	1.12	113	20	81	69.7	0.160782	0.955	1.06	1.10995	0.793764
467.1	tr|A8JRH3|A8JRH3_DROME	Tropomodulin, isoform G OS=Drosophila melanogaster GN=tmod PE=4 SV=1	1.04	0.87	1.01	0.89	1.17	1	1.02	64	15	59	54.5	0.161028	0.9525	1.06333	1.11636	0.793099
992.1	tr|Q9VAS2|Q9VAS2_DROME	CG14528 OS=Drosophila melanogaster GN=CG14528 PE=1 SV=1	0.97	0.91	1.07	0.87	1.07	0.98	1.12	29	9	79	18.4	0.161028	0.955	1.05667	1.10646	0.793098
137.2	tr|B7YZE0|B7YZE0_DROME	CAP, isoform P OS=Drosophila melanogaster GN=CAP PE=4 SV=1	0.99	0.91	1.05	0.94	1.05	1.02	1.03	106	33	212	25	0.161174	0.9725	1.03333	1.06255	0.792704
2798.1	tr|Q9W245|Q9W245_DROME	CG4610 OS=Drosophila melanogaster GN=CG4610 PE=2 SV=1	0.94	0.83	1	1.06	1.06	1.04	1.06	6	4	74	4.1	0.161188	0.9575	1.05333	1.10009	0.792667
356.1	tr|Q9VC05|Q9VC05_DROME	Oxysterol-binding protein OS=Drosophila melanogaster GN=Osbp PE=2 SV=1	1.02	0.87	1.05	0.9	1.08	1	1.08	83	20	89	46.5	0.161346	0.96	1.05333	1.09722	0.792242
2888.1	sp|P05130-2|KPC1_DROME	Isoform Short of Protein kinase C, brain isozyme OS=Drosophila melanogaster GN=Pkc53E	0.93	0.95	1.02	0.96	1.02	1.13	0.97	6	3	77	3.9	0.16168	0.965	1.04	1.07772	0.791345
1269.1	tr|Q9VLX0|Q9VLX0_DROME	Lysine ketoglutarate reductase OS=Drosophila melanogaster GN=LKR PE=1 SV=2	0.96	0.9	1.07	0.95	1.03	1.04	1.05	21	11	103	10.2	0.161757	0.97	1.04	1.07216	0.791136
5584.1	tr|Q9VP80|Q9VP80_DROME	Loner ISO1 OS=Drosophila melanogaster GN=siz PE=2 SV=2	1.08	0.95	0.93	0.86	0.99	1.13	1.06	1	1	144	0.3	0.161757	0.955	1.06	1.10995	0.791136
3734.1	tr|B7Z0M0|B7Z0M0_DROME	Kokopelli, isoform F OS=Drosophila melanogaster GN=koko PE=4 SV=1	0.88	0.9	1.04	1.01	1.15	0.98	1.05	3	2	14	10.9	0.161893	0.9575	1.06	1.10705	0.790772
206.1	tr|E1JJA4|E1JJA4_DROME	Shibire, isoform L OS=Drosophila melanogaster GN=shi PE=3 SV=1	1	0.97	1.02	0.97	1.03	1.02	1	129	30	98	65.5	0.161963	0.99	1.01667	1.02694	0.790584
3269.1	sp|O77237|PELI_DROME	Protein pellino OS=Drosophila melanogaster GN=Pli PE=1 SV=1	0.92	0.9	1.04	1.01	0.99	1.06	1.08	4	4	47	4.3	0.162069	0.9675	1.04333	1.07838	0.790301
213.2	tr|Q8IPB7|Q8IPB7_DROME	CG6206, isoform B OS=Drosophila melanogaster GN=CG6206 PE=2 SV=1	0.97	0.93	1.06	0.93	1.03	1.01	1.07	125	28	123	51	0.162192	0.9725	1.03667	1.06598	0.78997
2693.1	tr|Q9VX02|Q9VX02_DROME	CG7772 OS=Drosophila melanogaster GN=CG7772 PE=2 SV=1	0.91	0.81	1.06	0.91	1.27	1.16	0.89	7	2	18	19.2	0.162327	0.9225	1.10667	1.19964	0.789609
890.1	tr|Q9W2J4|Q9W2J4_DROME	CG4302 OS=Drosophila melanogaster GN=BEST:GH09393 PE=2 SV=2	0.99	0.88	1.07	0.91	1.06	1.01	1.08	32	14	60	26.6	0.162459	0.9625	1.05	1.09091	0.789257
474.1	sp|Q9VZ49|ENDOU_DROME	Poly(U)-specific endoribonuclease homolog OS=Drosophila melanogaster GN=CG2145 PE=1 SV=1	1	0.93	1.05	0.92	1.02	1.06	1.03	63	11	64	49.6	0.162602	0.975	1.03667	1.06325	0.788873
1217.1	tr|Q9VG04|Q9VG04_DROME	CG8031 OS=Drosophila melanogaster GN=CG8031 PE=2 SV=1	1	1.01	0.96	0.96	1	1.07	1	23	6	33	34.6	0.16283	0.9825	1.02333	1.04156	0.788265
2997.1	tr|Q9VVK2|Q9VVK2_DROME	CG6034 OS=Drosophila melanogaster GN=CG6034 PE=2 SV=1	1.08	0.98	1.34	0.92	0.96	0.89	0.83	5	4	54	4.6	0.162887	1.08	0.893333	0.82716	0.788115
5537.1	tr|Q7KU08|Q7KU08_DROME	CG31665, isoform B OS=Drosophila melanogaster GN=wry PE=2 SV=2	0.88	0.93	0.99	0.99	1.05	1.22	0.94	1	1	126	0.4	0.163543	0.9475	1.07	1.12929	0.786367
1197.1	sp|Q9VBP9|NPL4_DROME	Nuclear protein localization protein 4 homolog OS=Drosophila melanogaster GN=CG4673 PE=1 SV=3	0.98	0.94	1.05	0.94	1.03	1.01	1.05	23	10	73	15.7	0.163702	0.9775	1.03	1.05371	0.785946
5077.1	tr|Q9VSS9|Q9VSS9_DROME	CG5087 OS=Drosophila melanogaster GN=CG5087 PE=2 SV=1	0.99	1.06	1.04	1	0.99	1.01	0.91	1	1	124	0.4	0.163702	1.0225	0.97	0.948655	0.785946
3418.1	sp|Q9VCI0|ORN_DROME	Probable oligoribonuclease OS=Drosophila melanogaster GN=CG10214 PE=1 SV=1	0.97	0.93	0.91	1.06	1.03	1.1	1	4	2	24	8.2	0.163931	0.9675	1.04333	1.07838	0.785338
179.1	sp|P31007|DLG1_DROME	Disks large 1 tumor suppressor protein OS=Drosophila melanogaster GN=dlg1 PE=1 SV=2	1.01	0.91	1.04	0.92	1.08	1.04	1	153	27	107	71.8	0.163944	0.97	1.04	1.07216	0.785304
1179.1	sp|O61443|MK14B_DROME	Mitogen-activated protein kinase 14B OS=Drosophila melanogaster GN=p38b PE=1 SV=1	1.03	0.86	1.06	0.88	1.07	1.06	1.04	24	6	42	28.5	0.164118	0.9575	1.05667	1.10357	0.784845
651.1	tr|Q9VX69|Q9VX69_DROME	CG5162 OS=Drosophila melanogaster GN=CG5162 PE=2 SV=1	1.02	0.87	1.03	0.9	1.02	1	1.15	45	6	44	50.7	0.16414	0.955	1.05667	1.10646	0.784784
3920.1	tr|Q9VLP1|Q9VLP1_DROME	CG14275, isoform A OS=Drosophila melanogaster GN=CG14275 PE=2 SV=1	1.03	0.93	0.94	0.99	1.02	0.99	1.08	3	1	16	9.3	0.164171	0.9725	1.03	1.05913	0.784704
2415.1	sp|Q9VYS5|U551_DROME	UPF0551 protein CG15738 homolog, mitochondrial OS=Drosophila melanogaster GN=CG15738 PE=2 SV=1	0.92	0.97	1.08	0.82	1.14	0.98	1.09	8	5	38	10.5	0.164256	0.9475	1.07	1.12929	0.78448
3632.1	sp|A1ZBW7|FAM21_DROME	WASH complex subunit FAM21 homolog OS=Drosophila melanogaster GN=CG16742 PE=1 SV=1	0.86	0.67	1.21	0.84	1.27	0.99	1.16	3	3	161	0.9	0.164256	0.895	1.14	1.27374	0.78448
4508.1	tr|Q8MLQ0|Q8MLQ0_DROME	FI14118p OS=Drosophila melanogaster GN=HSPC300 PE=2 SV=1	1.03	0.75	0.99	0.81	1.26	0.84	1.31	2	1	9	11.3	0.164353	0.895	1.13667	1.27002	0.784222
379.1	sp|P46150-2|MOEH_DROME	Isoform D of Moesin/ezrin/radixin homolog 1 OS=Drosophila melanogaster GN=Moe	1	0.96	1.02	0.96	1.06	1	1.01	77	18	68	56.8	0.164977	0.985	1.02333	1.03892	0.782576
4999.1	tr|Q86BH3|Q86BH3_DROME	CG33057 OS=Drosophila melanogaster GN=mkg-p PE=2 SV=1	0.71	0.8	1.18	0.92	1.22	0.96	1.21	1	1	24	2.1	0.165374	0.9025	1.13	1.25208	0.781534
2742.1	tr|Q9VKW4|Q9VKW4_DROME	Klp31E, isoform A OS=Drosophila melanogaster GN=Klp31E PE=2 SV=2	0.96	0.91	1.07	0.92	1.08	0.98	1.09	6	5	119	2.5	0.165443	0.965	1.05	1.08808	0.781353
1008.1	sp|P41092|RL27A_DROME	60S ribosomal protein L27a OS=Drosophila melanogaster GN=RpL27A PE=2 SV=2	1.02	0.99	1.04	1.04	1.03	0.97	0.9	29	4	17	85.2	0.165479	1.0225	0.966667	0.945395	0.781256
4843.1	tr|Q9VIU5|Q9VIU5_DROME	CG10137 OS=Drosophila melanogaster GN=CG10137 PE=2 SV=2	0.94	0.85	0.95	0.92	1.39	0.96	0.98	1	1	104	0.5	0.16575	0.915	1.11	1.21311	0.780546
1045.1	tr|Q9VWF0|Q9VWF0_DROME	CG12237 OS=Drosophila melanogaster GN=CG12237 PE=2 SV=1	1.03	0.9	1	0.94	1.04	1.11	0.98	28	5	35	40.5	0.165785	0.9675	1.04333	1.07838	0.780456
2383.1	tr|Q29QE1|Q29QE1_DROME	GH15984p OS=Drosophila melanogaster GN=RhoGAP1A PE=2 SV=1	0.97	0.98	0.93	0.98	1.04	1.15	0.95	8	6	155	2.6	0.16603	0.965	1.04667	1.08463	0.779814
3207.1	tr|Q9VY87|Q9VY87_DROME	CG10992 OS=Drosophila melanogaster GN=CG10992 PE=2 SV=1	0.87	0.89	1.07	0.97	1.06	0.97	1.18	4	4	37	5.3	0.166043	0.95	1.07	1.12632	0.77978
180.1	tr|Q9VL70|Q9VL70_DROME	HL08109p OS=Drosophila melanogaster GN=yip2 PE=2 SV=1	1.02	0.91	1.04	0.91	1.05	1.06	1.01	153	14	42	184	0.166118	0.97	1.04	1.07216	0.779583
1356.1	sp|P82890|PPAC1_DROME	Low molecular weight phosphotyrosine protein phosphatase 1 OS=Drosophila melanogaster GN=primo-1 PE=2 SV=1	1.04	0.9	1	0.91	1.13	1.06	0.97	20	6	18	57	0.166122	0.9625	1.05333	1.09437	0.779572
320.1	tr|Q9VG32|Q9VG32_DROME	Malic enzyme OS=Drosophila melanogaster GN=Men PE=2 SV=1	1.01	0.9	1.06	0.86	1.12	1.02	1.03	89	15	84	52.8	0.166283	0.9575	1.05667	1.10357	0.779152
5281.1	tr|Q9VU34|Q9VU34_DROME	LD45758p OS=Drosophila melanogaster GN=MICAL-like PE=2 SV=2	0.96	0.77	1.07	0.87	1.32	1.06	0.95	1	1	114	0.4	0.166512	0.9175	1.11	1.20981	0.778554
4798.1	tr|Q8SYU0|Q8SYU0_DROME	CG9586 OS=Drosophila melanogaster GN=CG9586 PE=2 SV=1	0.78	0.68	1.13	0.99	1.34	0.96	1.12	1	1	24	2.1	0.16656	0.895	1.14	1.27374	0.778428
4076.1	sp|Q9W328|LST8_DROME	Protein LST8 homolog OS=Drosophila melanogaster GN=CG3004 PE=2 SV=2	0.98	0.79	1.01	1.03	1.09	1.04	1.05	2	2	35	2.8	0.166762	0.9525	1.06	1.11286	0.777902
2206.1	tr|E1JJ49|E1JJ49_DROME	Ubiquitin carrier protein OS=Drosophila melanogaster GN=UbcD6 PE=3 SV=1	1.03	1.03	1.01	1.06	1.01	1.01	0.84	10	1	13	37.2	0.166769	1.0325	0.953333	0.923325	0.777886
1880.1	tr|Q7KLW9|Q7KLW9_DROME	BcDNA.LD02793 OS=Drosophila melanogaster GN=Prp19 PE=2 SV=1	0.98	0.92	1	1.02	1.06	1.04	0.99	12	7	55	10.9	0.166898	0.98	1.03	1.05102	0.77755
2417.1	tr|Q9W329|Q9W329_DROME	Gga OS=Drosophila melanogaster GN=Gga PE=2 SV=2	1.02	0.82	1.06	0.91	1.12	1.04	1.03	8	5	73	5.5	0.167114	0.9525	1.06333	1.11636	0.776988
2681.1	sp|P23696|PP2A_DROME	Serine/threonine-protein phosphatase PP2A OS=Drosophila melanogaster GN=mts PE=2 SV=1	0.84	0.79	1.12	0.88	1.25	0.88	1.24	7	3	35	9.9	0.167291	0.9075	1.12333	1.23783	0.776527
4426.1	tr|A1Z6M6|A1Z6M6_DROME	DNA polymerase interacting tpr containing protein of 47kD OS=Drosophila melanogaster GN=Dpit47 PE=4 SV=1	1.12	0.86	0.77	0.93	1.09	1.27	0.96	2	1	47	2.1	0.167471	0.92	1.10667	1.2029	0.776062
292.1	sp|Q27580|SAHH_DROME	Adenosylhomocysteinase OS=Drosophila melanogaster GN=Ahcy13 PE=1 SV=2	0.96	0.95	1.02	0.98	1.02	1.09	0.98	96	9	47	101.4	0.167561	0.9775	1.03	1.05371	0.775828
1640.1	tr|A2RVG6|A2RVG6_DROME	IP17501p OS=Drosophila melanogaster GN=ome PE=2 SV=1	1.02	0.93	1	0.96	1.04	1.07	0.98	15	6	117	6.4	0.167561	0.9775	1.03	1.05371	0.775828
1494.1	tr|Q53ZT0|Q53ZT0_DROME	DNAJ-1 OS=Drosophila melanogaster GN=DnaJ-1 PE=2 SV=1	1.03	0.87	1.02	0.94	1.1	1.04	1	17	8	37	23	0.167619	0.965	1.04667	1.08463	0.775676
2983.1	tr|Q9VVM2|Q9VVM2_DROME	CG5506 OS=Drosophila melanogaster GN=CG5506 PE=2 SV=1	1.01	1.08	1.47	0.87	0.91	0.88	0.78	5	4	20	12.5	0.167716	1.1075	0.856667	0.773514	0.775425
441.1	tr|Q7YTZ4|Q7YTZ4_DROME	CG10737, isoform E OS=Drosophila melanogaster GN=CG10737 PE=2 SV=1	1	0.92	1.01	0.96	1.13	1.01	0.99	68	21	98	34.7	0.167792	0.9725	1.04333	1.07284	0.77523
4559.1	tr|Q8IRA6|Q8IRA6_DROME	CG32234 OS=Drosophila melanogaster GN=axo PE=2 SV=1	0.88	0.78	1.1	0.89	1.27	0.89	1.18	2	1	36	2.8	0.168008	0.9125	1.11333	1.22009	0.774671
4378.1	tr|O76899|O76899_DROME	EG:80H7.2 protein OS=Drosophila melanogaster GN=pck PE=2 SV=1	1.2	1.07	1.12	0.97	1.14	0.67	0.84	2	1	30	3.4	0.168105	1.09	0.883333	0.810398	0.77442
2976.1	tr|Q95RI7|Q95RI7_DROME	CG17454 OS=Drosophila melanogaster GN=CG17454 PE=2 SV=1	1.02	0.9	1.03	0.95	1.06	1.04	1.01	5	4	28	8.9	0.168199	0.975	1.03667	1.06325	0.774176
1947.1	tr|O16158|O16158_DROME	Calcium-binding protein OS=Drosophila melanogaster GN=Scp2 PE=2 SV=1	0.89	1.01	1.03	0.95	1.09	1	1.03	12	3	21	28.2	0.16828	0.97	1.04	1.07216	0.773969
3390.1	sp|Q9VHB3|U406_DROME	UPF0406 protein CG16790 OS=Drosophila melanogaster GN=CG16790 PE=1 SV=1	1.06	0.95	0.95	0.88	1.12	1.02	1	4	3	29	6.9	0.168519	0.96	1.04667	1.09028	0.773352
5480.1	sp|Q9VDD7|S35B1_DROME	Solute carrier family 35 member B1 homolog OS=Drosophila melanogaster GN=CG5802 PE=1 SV=1	1.07	0.83	0.98	0.84	1.22	0.92	1.14	1	1	37	1.3	0.168807	0.93	1.09333	1.17563	0.77261
2641.2	tr|Q9VPH9|Q9VPH9_DROME	CG6289 OS=Drosophila melanogaster GN=Spn77Bc PE=2 SV=3	0.91	0.66	0.82	1.12	0.84	1.3	1.34	4	4	47	4.2	0.168958	0.8775	1.16	1.32194	0.772222
3393.1	tr|Q9VF12|Q9VF12_DROME	CG31291, isoform A OS=Drosophila melanogaster GN=CG31291 PE=2 SV=2	0.8	1.01	0.96	1.01	0.97	1.06	1.18	4	3	118	1.7	0.169096	0.945	1.07	1.13228	0.771867
4833.1	sp|Q8T088|WDR55_DROME	WD repeat-containing protein 55 homolog OS=Drosophila melanogaster GN=CG14722 PE=2 SV=1	0.99	0.85	0.92	1.04	1.17	0.96	1.06	1	1	55	0.9	0.169106	0.95	1.06333	1.1193	0.77184
5598.1	tr|Q8IPF3|Q8IPF3_DROME	Diuretic hormone 31, isoform C OS=Drosophila melanogaster GN=Dh31 PE=2 SV=1	0.94	0.92	1.02	0.98	0.96	1.04	1.14	1	1	13	3.9	0.169202	0.965	1.04667	1.08463	0.771595
1910.1	tr|Q9VXE7|Q9VXE7_DROME	CG9784 OS=Drosophila melanogaster GN=CG9784 PE=2 SV=1	0.95	0.99	1.05	0.85	1.13	0.99	1.05	12	5	59	10.2	0.169255	0.96	1.05667	1.10069	0.77146
2144.1	sp|Q24276|CDC37_DROME	Hsp90 co-chaperone Cdc37 OS=Drosophila melanogaster GN=Cdc37 PE=1 SV=1	0.93	0.98	0.99	0.93	1.14	1.1	0.92	10	5	45	11.1	0.169302	0.9575	1.05333	1.10009	0.771337
2633.1	tr|Q9VHX2|Q9VHX2_DROME	CG3223 OS=Drosophila melanogaster GN=CG3223 PE=2 SV=1	0.98	0.94	0.98	0.97	1.14	1.04	0.95	7	4	45	7.8	0.169464	0.9675	1.04333	1.07838	0.770924
5632.1	tr|Q8SYW1|Q8SYW1_DROME	CG6125, isoform B OS=Drosophila melanogaster GN=CG6125 PE=2 SV=1	0.76	0.9	1.05	0.98	1.28	0.94	1.08	1	1	67	0.8	0.16947	0.9225	1.1	1.19241	0.770907
4246.1	tr|Q9VPN3|Q9VPN3_DROME	CG11562 OS=Drosophila melanogaster GN=CG11562 PE=2 SV=1	0.85	0.8	1.05	1.05	1.01	1.18	1.05	2	2	14	7.3	0.169681	0.9375	1.08	1.152	0.770367
807.1	sp|Q9VCI3-3|LSD1_DROME	Isoform C of Lipid storage droplets surface-binding protein 1 OS=Drosophila melanogaster GN=Lsd-1	0.99	1.02	0.99	1.08	1	0.94	0.98	36	10	46	39.3	0.169892	1.02	0.973333	0.954248	0.769826
139.1	tr|Q9VGQ1|Q9VGQ1_DROME	CG5214 OS=Drosophila melanogaster GN=CG5214 PE=2 SV=1	0.99	0.9	1.03	0.98	1.07	1.03	1	197	14	50	197.4	0.170085	0.975	1.03333	1.05983	0.769333
2692.1	tr|Q7K2L7|Q7K2L7_DROME	CG17765 OS=Drosophila melanogaster GN=CG17765 PE=2 SV=1	1.03	0.92	1.01	0.92	1.1	0.99	1.03	7	2	22	15.6	0.170428	0.97	1.04	1.07216	0.768458
2460.1	tr|Q9VMF1|Q9VMF1_DROME	CG9497 OS=Drosophila melanogaster GN=CG9497 PE=1 SV=3	0.96	0.94	1.04	0.96	1.08	0.97	1.06	8	4	48	8.3	0.170966	0.975	1.03667	1.06325	0.76709
179.3	sp|P31007-9|DLG1_DROME	Isoform K of Disks large 1 tumor suppressor protein OS=Drosophila melanogaster GN=dlg1	1.02	0.9	1.04	0.92	1.09	1.02	1.02	129	25	100	64.2	0.171087	0.97	1.04333	1.0756	0.766782
920.1	tr|Q9V434|Q9V434_DROME	Asparaginyl-tRNA synthetase OS=Drosophila melanogaster GN=Aats-asn PE=2 SV=1	0.99	0.88	1.04	0.96	1.08	1.05	0.99	31	11	64	24.3	0.171253	0.9675	1.04	1.07494	0.766363
2761.1	tr|Q9VK42|Q9VK42_DROME	CG9932 OS=Drosophila melanogaster GN=CG9932 PE=2 SV=2	0.91	0.95	1.08	0.93	1.06	1.01	1.06	6	5	237	1.3	0.171289	0.9675	1.04333	1.07838	0.76627
424.1	sp|Q03334|RS13_DROME	40S ribosomal protein S13 OS=Drosophila melanogaster GN=RpS13 PE=2 SV=3	0.99	1	1.05	1.09	0.95	1.04	0.88	71	6	17	206.8	0.171289	1.0325	0.956667	0.926554	0.76627
2691.1	tr|Q95RV5|Q95RV5_DROME	Ribulose-phosphate 3-epimerase OS=Drosophila melanogaster GN=boca PE=2 SV=1	1.01	0.85	1.02	0.94	1.05	0.97	1.15	7	2	24	14.4	0.171302	0.955	1.05667	1.10646	0.766237
4484.1	tr|Q9VDH8|Q9VDH8_DROME	Ribosomal protein S30, isoform A OS=Drosophila melanogaster GN=RpS30 PE=2 SV=1	1.11	1	1.1	0.97	1.04	0.95	0.83	2	1	15	6.9	0.171379	1.045	0.94	0.899522	0.766042
4920.1	sp|Q7K2Y9|NTAQ1_DROME	Protein N-terminal glutamine amidohydrolase OS=Drosophila melanogaster GN=tun PE=1 SV=1	1.01	0.94	1.01	0.95	0.98	1.08	1.03	1	1	24	2.1	0.171379	0.9775	1.03	1.05371	0.766042
405.1	sp|Q9VLS1|KPBB_DROME	Probable phosphorylase b kinase regulatory subunit beta OS=Drosophila melanogaster GN=CG8475 PE=2 SV=2	1	0.94	1.03	0.94	1.05	0.99	1.04	73	19	125	29.2	0.171532	0.9775	1.02667	1.0503	0.765655
742.1	sp|Q9VYQ8|UBP7_DROME	Ubiquitin carboxyl-terminal hydrolase 7 OS=Drosophila melanogaster GN=Usp7 PE=1 SV=1	0.95	0.93	1.04	0.99	1.04	1	1.04	39	19	130	15	0.171532	0.9775	1.02667	1.0503	0.765655
2296.1	tr|Q9VXN3|Q9VXN3_DROME	CG8578 OS=Drosophila melanogaster GN=CG8578 PE=2 SV=2	0.96	0.89	1.03	0.92	1.21	1.04	0.95	9	4	45	9.9	0.171626	0.95	1.06667	1.12281	0.765417
504.1	tr|Q7K110|Q7K110_DROME	CG6370 OS=Drosophila melanogaster GN=CG6370 PE=2 SV=1	1	0.92	1	0.99	1.07	1.06	0.97	59	14	69	42.6	0.172243	0.9775	1.03333	1.05712	0.763858
1570.1	tr|Q9W4U2|Q9W4U2_DROME	CG3603 OS=Drosophila melanogaster GN=CG3603 PE=2 SV=2	1.04	0.83	1.05	0.88	1	1.09	1.1	16	6	26	30.5	0.172373	0.95	1.06333	1.1193	0.763531
4487.1	tr|Q9VWH5|Q9VWH5_DROME	CG14200 OS=Drosophila melanogaster GN=CG14200 PE=2 SV=1	0.97	0.77	0.74	0.87	1.76	1.02	0.87	2	1	222	0.5	0.172453	0.8375	1.21667	1.45274	0.763329
2492.1	tr|Q9VBT6|Q9VBT6_DROME	CG10514 OS=Drosophila melanogaster GN=CG10514 PE=2 SV=1	0.83	1.01	1.03	0.91	1.1	1.18	0.94	8	3	48	8.4	0.172476	0.945	1.07333	1.1358	0.76327
2616.1	tr|Q9VCI4|Q9VCI4_DROME	CG10217, isoform A OS=Drosophila melanogaster GN=CG10217-RA PE=2 SV=2	0.92	0.95	1.05	0.97	0.99	1.03	1.1	7	4	71	4.9	0.173017	0.9725	1.04	1.06941	0.761911
1357.1	tr|Q8IMQ8|Q8IMQ8_DROME	CG6330, isoform B OS=Drosophila melanogaster GN=CG6330-RB PE=2 SV=1	0.96	0.92	1.05	0.97	1	1.05	1.04	20	6	39	25.9	0.173461	0.975	1.03	1.05641	0.760798
4197.1	tr|Q9W486|Q9W486_DROME	CG32758 OS=Drosophila melanogaster GN=CG32758 PE=2 SV=2	1.03	1.06	1.05	0.96	1.02	0.93	0.96	2	2	59	1.7	0.173461	1.025	0.97	0.946341	0.760798
2694.1	tr|Q9VJ11|Q9VJ11_DROME	CG10470 OS=Drosophila melanogaster GN=CG10470 PE=2 SV=1	0.84	0.84	1.11	0.86	1.18	0.88	1.29	7	2	21	16.8	0.173972	0.9125	1.11667	1.22374	0.759522
3260.1	tr|Q8IRE3|Q8IRE3_DROME	Gryzun, isoform B OS=Drosophila melanogaster GN=gry PE=2 SV=2	0.9	0.82	0.99	1.09	1.14	1.01	1.06	4	4	149	1.3	0.17407	0.95	1.07	1.12632	0.759277
4823.1	sp|P42280|TRYZ_DROME	Trypsin zeta OS=Drosophila melanogaster GN=zetaTry PE=1 SV=2	1	0.91	0.87	0.98	1.11	1.22	0.9	1	1	30	1.7	0.174211	0.94	1.07667	1.14539	0.758923
2205.1	tr|Q9VF72|Q9VF72_DROME	CG14868 OS=Drosophila melanogaster GN=CG14868 PE=2 SV=1	1	0.97	1	0.99	1.01	1.04	0.99	10	1	58	8.6	0.174688	0.99	1.01333	1.02357	0.757737
1275.1	tr|Q9W2V9|Q9W2V9_DROME	LD40707p OS=Drosophila melanogaster GN=l(1)G0289 PE=2 SV=1	0.89	1.02	0.96	1.01	1.03	1.1	0.99	21	9	67	15.6	0.174688	0.97	1.04	1.07216	0.757737
1351.1	tr|Q8IQX8|Q8IQX8_DROME	Histidyl-tRNA synthetase, isoform B OS=Drosophila melanogaster GN=Aats-his PE=2 SV=1	0.94	0.97	1	1.01	1.01	1.08	0.99	20	7	62	16.1	0.174688	0.98	1.02667	1.04762	0.757737
833.1	tr|Q9Y125|Q9Y125_DROME	BcDNA.GH08312 OS=Drosophila melanogaster GN=Sap-r PE=2 SV=1	0.99	0.92	1.03	0.98	1.03	1.05	1	35	6	106	16.5	0.174688	0.98	1.02667	1.04762	0.757737
2797.1	tr|Q8IQX3|Q8IQX3_DROME	CG32544 OS=Drosophila melanogaster GN=CG32544 PE=2 SV=1	1.03	0.83	1.07	0.87	1.1	1.06	1.03	6	4	20	14.8	0.174803	0.95	1.06333	1.1193	0.757451
3398.1	tr|Q9W2X2|Q9W2X2_DROME	CG34408, isoform A OS=Drosophila melanogaster GN=CG34408-RA PE=2 SV=3	0.9	1.02	0.96	1	1.06	1.08	0.97	4	3	169	1.2	0.175021	0.97	1.03667	1.06873	0.75691
1229.1	sp|P20240|OTE_DROME	Otefin OS=Drosophila melanogaster GN=Ote PE=1 SV=2	0.98	0.95	0.99	0.95	1.14	1.02	0.96	22	11	47	23.6	0.175216	0.9675	1.04	1.07494	0.756426
4600.1	tr|Q9VTS8|Q9VTS8_DROME	Antisocial isoform 1 OS=Drosophila melanogaster GN=rols PE=2 SV=2	1.05	0.91	0.97	0.89	1.17	0.98	1.02	2	1	169	0.6	0.175332	0.955	1.05667	1.10646	0.756138
2812.1	tr|Q7JNE1|Q7JNE1_DROME	Non-histone chromosomal protein Prod OS=Drosophila melanogaster GN=prod PE=2 SV=1	1.04	0.98	1.04	1.01	1	1	0.93	6	4	39	7.6	0.175465	1.0175	0.976667	0.959869	0.75581
4016.1	tr|Q9VTC1|Q9VTC1_DROME	CG6418 OS=Drosophila melanogaster GN=CG6418 PE=2 SV=1	1.03	0.96	0.96	0.98	1.06	0.99	1.02	2	2	87	1.1	0.175465	0.9825	1.02333	1.04156	0.75581
1762.1	tr|Q9VM93|Q9VM93_DROME	LD33094p OS=Drosophila melanogaster GN=Liprin-alpha PE=2 SV=2	1.05	0.84	1.04	0.9	1.11	1.03	1.04	13	12	135	4.8	0.175938	0.9575	1.06	1.10705	0.754642
199.1	tr|Q9VIT9|Q9VIT9_DROME	Thiolester containing protein IV OS=Drosophila melanogaster GN=TepIV PE=1 SV=2	0.98	0.9	1.07	0.89	1.06	0.98	1.13	135	45	168	40.1	0.175954	0.96	1.05667	1.10069	0.7546
472.1	tr|Q9Y162|Q9Y162_DROME	BcDNA.GH02678 OS=Drosophila melanogaster GN=Vps4 PE=2 SV=1	1.02	0.91	1.03	0.94	1.06	1.01	1.03	63	15	50	63.5	0.176209	0.975	1.03333	1.05983	0.753972
4156.1	sp|Q9VGC3|COG1_DROME	Conserved oligomeric Golgi complex subunit 1 OS=Drosophila melanogaster GN=CG4848 PE=1 SV=1	0.94	0.75	1.07	0.96	1.1	1.23	0.95	2	2	100	1	0.17624	0.93	1.09333	1.17563	0.753896
824.1	tr|O18335|O18335_DROME	Drab11 OS=Drosophila melanogaster GN=Rab11 PE=2 SV=1	0.95	0.93	1.07	0.95	1.06	1.03	1.02	35	10	24	72.2	0.176437	0.975	1.03667	1.06325	0.75341
2348.1	tr|Q9W1X3|Q9W1X3_DROME	CG30190, isoform A OS=Drosophila melanogaster GN=CG30190 PE=2 SV=2	0.94	0.93	0.97	0.97	1.12	1.17	0.9	8	8	45	8.8	0.176478	0.9525	1.06333	1.11636	0.75331
282.1	tr|Q9W402|Q9W402_DROME	CG3446 OS=Drosophila melanogaster GN=CG3446 PE=2 SV=1	0.92	0.94	1.05	0.97	1.04	0.98	1.1	99	6	18	279.1	0.176799	0.97	1.04	1.07216	0.752521
2484.1	tr|Q6IGW6|Q6IGW6_DROME	CG34200 OS=Drosophila melanogaster GN=CG34200 PE=4 SV=1	1.03	1.03	0.96	1.1	1.02	0.96	0.9	8	3	6	68.2	0.176799	1.03	0.96	0.932039	0.752521
2778.1	tr|Q9VIK0|Q9VIK0_DROME	CG9319 OS=Drosophila melanogaster GN=CG9319-RA PE=2 SV=1	0.96	0.99	1.02	0.91	1.06	1.1	0.96	6	4	42	7.2	0.176799	0.97	1.04	1.07216	0.752521
5556.1	sp|P54361|OAZ_DROME	Ornithine decarboxylase antizyme OS=Drosophila melanogaster GN=Oda PE=1 SV=2	0.89	0.92	1.12	0.85	1.14	0.98	1.1	1	1	28	1.8	0.176886	0.945	1.07333	1.1358	0.752307
2529.1	sp|Q9W4M9|NSUN2_DROME	tRNA (cytosine(34)-C(5))-methyltransferase OS=Drosophila melanogaster GN=CG6133 PE=2 SV=1	0.98	0.93	1.07	0.92	1.06	1.03	1.03	7	7	84	4.2	0.177309	0.975	1.04	1.06667	0.75127
170.1	tr|Q9W330|Q9W330_DROME	Hexokinase A, isoform A OS=Drosophila melanogaster GN=Hex-A PE=2 SV=1	0.97	0.9	1.06	0.96	1.06	1.01	1.04	162	14	59	136.8	0.177511	0.9725	1.03667	1.06598	0.750775
3292.1	sp|Q9NHA8|BGBP3_DROME	Gram-negative bacteria-binding protein 3 OS=Drosophila melanogaster GN=GNBP3 PE=1 SV=2	1.04	0.92	1.03	0.86	1.08	1.07	1	4	3	55	3.6	0.177555	0.9625	1.05	1.09091	0.750666
3052.1	tr|Q9VVX4|Q9VVX4_DROME	Mitochondrial ribosomal protein L21 OS=Drosophila melanogaster GN=mRpL21 PE=2 SV=2	0.99	1.22	1	1.12	1.01	1.02	0.64	5	3	23	11.1	0.178066	1.0825	0.89	0.822171	0.749419
3373.1	sp|P51140|DSH_DROME	Segment polarity protein dishevelled OS=Drosophila melanogaster GN=dsh PE=1 SV=2	1.06	0.88	1	0.9	1.13	1.02	1.01	4	3	69	2.9	0.178243	0.96	1.05333	1.09722	0.748989
342.1	tr|Q9W205|Q9W205_DROME	Jitterbug, isoform F OS=Drosophila melanogaster GN=jbug PE=1 SV=5	0.96	0.9	1.07	0.94	1.11	1.02	1.01	85	37	319	13.3	0.178422	0.9675	1.04667	1.08183	0.748552
1134.1	tr|A8JNN2|A8JNN2_DROME	Ect4, isoform G OS=Drosophila melanogaster GN=Ect4 PE=4 SV=1	1.02	0.85	1.05	0.9	1.13	0.97	1.09	25	9	169	7.4	0.178768	0.955	1.06333	1.11344	0.74771
2265.1	tr|Q9VVP3|Q9VVP3_DROME	Chemosensory protein A 75a OS=Drosophila melanogaster GN=CheA75a PE=1 SV=2	0.97	0.98	1.02	0.98	0.99	1.03	1.02	9	5	21	21.6	0.178827	0.9875	1.01333	1.02616	0.747566
1234.1	tr|Q8MV37|Q8MV37_DROME	Myosin binding subunit of myosin phosphatase OS=Drosophila melanogaster GN=Mbs PE=2 SV=1	0.92	0.97	1.04	0.98	1.07	1.01	1.01	22	10	119	9.2	0.178897	0.9775	1.03	1.05371	0.747397
2461.1	tr|Q7K1H0|Q7K1H0_DROME	CG32066, isoform B OS=Drosophila melanogaster GN=CG6491 PE=2 SV=1	1.02	0.91	1.01	0.94	1.11	1.03	0.98	8	4	37	10.9	0.178897	0.97	1.04	1.07216	0.747397
3308.1	tr|Q9VE52|Q9VE52_DROME	Cleavage stimulation factor 64 kilodalton subunit OS=Drosophila melanogaster GN=CstF-64 PE=2 SV=2	1.03	1.02	1.04	0.97	0.96	1.01	0.97	4	3	46	4.3	0.178897	1.015	0.98	0.965517	0.747397
67.1	sp|Q04499-5|PROD_DROME	Isoform E of Proline dehydrogenase 1, mitochondrial OS=Drosophila melanogaster GN=slgA	1	0.93	1.04	0.95	1.06	1.02	1.01	483	35	77	312.8	0.179399	0.98	1.03	1.05102	0.746181
3870.1	sp|Q9VN19|GET4_DROME	Golgi to ER traffic protein 4 homolog OS=Drosophila melanogaster GN=CG9853 PE=1 SV=1	1.07	0.96	0.93	0.88	1.13	1.05	0.98	3	2	38	3.9	0.17942	0.96	1.05333	1.09722	0.74613
1004.1	tr|Q9VHB1|Q9VHB1_DROME	CG9399, isoform A OS=Drosophila melanogaster GN=CG9399 PE=2 SV=1	1.04	0.97	0.89	0.93	1.15	0.95	1.06	29	6	17	87.5	0.179476	0.9575	1.05333	1.10009	0.745994
1808.1	tr|Q9W452|Q9W452_DROME	CG6067 OS=Drosophila melanogaster GN=CG6067 PE=2 SV=2	0.98	0.87	1.05	0.93	1.16	1.03	0.98	13	6	34	19.1	0.180053	0.9575	1.05667	1.10357	0.744599
2764.1	sp|Q7PLS8|INT3_DROME	Integrator complex subunit 3 homolog OS=Drosophila melanogaster GN=CG17665 PE=1 SV=1	1.09	0.96	1.07	1.01	0.97	1.02	0.87	6	5	124	2.4	0.180056	1.0325	0.953333	0.923325	0.744593
1614.1	tr|Q9W0X0|Q9W0X0_DROME	Epithelial membrane protein, isoform B OS=Drosophila melanogaster GN=emp PE=1 SV=2	1.02	0.9	1.05	0.9	1.08	1	1.06	15	8	62	12.1	0.180056	0.9675	1.04667	1.08183	0.744593
5385.1	sp|Q9VD92|ARCH_DROME	Protein archease-like OS=Drosophila melanogaster GN=CG6353 PE=2 SV=1	1.03	0.79	0.96	0.91	1.18	0.87	1.26	1	1	18	2.8	0.180079	0.9225	1.10333	1.19603	0.744537
905.1	tr|Q9VYS2|Q9VYS2_DROME	GH09980p OS=Drosophila melanogaster GN=pot PE=2 SV=1	1.02	0.9	1.01	0.97	1.06	1.03	1	32	8	107	14.9	0.180277	0.975	1.03	1.05641	0.744059
560.1	tr|Q1WWC9|Q1WWC9_DROME	Dynamin associated protein 160, isoform C OS=Drosophila melanogaster GN=Dap160 PE=2 SV=1	0.98	0.94	1.02	0.96	1.09	1.03	0.97	52	24	121	21.6	0.180277	0.975	1.03	1.05641	0.744059
345.1	tr|Q7K3E2|Q7K3E2_DROME	CG5080, isoform A OS=Drosophila melanogaster GN=CG5080 PE=2 SV=1	1.02	0.89	1.03	0.92	1.04	0.99	1.09	85	18	61	69.5	0.180307	0.965	1.04	1.07772	0.743987
5089.1	sp|Q9VDL1|U483_DROME	UPF0483 protein CG5412 OS=Drosophila melanogaster GN=CG5412 PE=2 SV=1	1.02	0.97	0.76	0.91	1.06	1.36	0.92	1	1	31	1.6	0.180313	0.915	1.11333	1.21676	0.743973
5113.1	sp|Q9W123|POF_DROME	Protein painting of fourth OS=Drosophila melanogaster GN=Pof PE=1 SV=1	0.97	0.83	0.99	0.86	0.91	1.4	1.04	1	1	55	0.9	0.180641	0.9125	1.11667	1.22374	0.743183
858.1	tr|Q5U0V7|Q5U0V7_DROME	GH06496p OS=Drosophila melanogaster GN=synj PE=2 SV=1	1.03	0.91	1.02	0.93	1.06	1.04	1	33	19	135	12.3	0.180989	0.9725	1.03333	1.06255	0.742349
848.1	tr|Q9VFG5|Q9VFG5_DROME	RE17477p OS=Drosophila melanogaster GN=smp-30 PE=2 SV=1	1.03	0.83	1.11	0.76	1.13	1.08	1.05	34	7	33	51	0.18129	0.9325	1.08667	1.16533	0.741627
4028.1	tr|Q6NLM7|Q6NLM7_DROME	CG33514 OS=Drosophila melanogaster GN=CG15018 PE=2 SV=1	0.92	0.79	1.14	0.9	1.03	1.15	1.06	2	2	36	2.8	0.181402	0.9375	1.08	1.152	0.741359
5271.1	tr|O46101|O46101_DROME	EG:8D8.7 protein OS=Drosophila melanogaster GN=Tsp2A PE=2 SV=1	0.76	0.69	1.12	1.01	1.38	0.98	1.06	1	1	27	1.9	0.181449	0.895	1.14	1.27374	0.741245
1691.1	tr|Q9VLQ8|Q9VLQ8_DROME	PDGF-and VEGF-receptor related, isoform A OS=Drosophila melanogaster GN=Pvr PE=2 SV=2	1	0.92	1.04	0.94	1	1.02	1.09	14	9	170	4.1	0.181825	0.975	1.03667	1.06325	0.740347
3788.1	tr|Q9VDS0|Q9VDS0_DROME	CG4462 OS=Drosophila melanogaster GN=CG4462-RA PE=2 SV=1	1.09	0.81	1.02	0.87	1.06	1.08	1.06	3	2	64	2.4	0.18211	0.9475	1.06667	1.12577	0.739666
1080.1	sp|P38040|GBG1_DROME	Guanine nucleotide-binding protein subunit gamma-1 OS=Drosophila melanogaster GN=Ggamma1 PE=2 SV=1	0.99	0.97	1	0.94	1.11	1.02	0.97	27	1	8	166.1	0.182228	0.975	1.03333	1.05983	0.739385
3183.1	tr|Q9VTA5|Q9VTA5_DROME	CG18628 OS=Drosophila melanogaster GN=CG18628 PE=2 SV=1	0.93	0.83	1.09	0.93	1.08	1.18	0.96	5	1	7	35.9	0.182475	0.945	1.07333	1.1358	0.738798
3520.1	tr|Q9W1H5|Q9W1H5_DROME	Decapping protein 1, isoform A OS=Drosophila melanogaster GN=Dcp1 PE=1 SV=1	0.93	0.94	1	1.02	0.98	1.11	1.02	4	1	41	4.8	0.182475	0.9725	1.03667	1.06598	0.738798
3980.1	sp|Q08605|GAGA_DROME	Transcription factor GAGA OS=Drosophila melanogaster GN=Trl PE=1 SV=2	1.02	0.84	1.03	0.88	1.18	1.11	0.93	3	1	62	2.4	0.182638	0.9425	1.07333	1.13882	0.738408
5735.1	tr|Q8IQD0|Q8IQD0_DROME	CG16711, isoform B OS=Drosophila melanogaster GN=CG16711 PE=1 SV=1	0.82	0.93	0.97	1.03	0.94	1.05	1.26	1	1	137	0.4	0.182943	0.9375	1.08333	1.15556	0.737683
3623.1	tr|Q9VIG1|Q9VIG1_DROME	CG12050 OS=Drosophila melanogaster GN=CG12050-RB PE=2 SV=2	0.93	0.86	1.06	0.91	1.22	1.09	0.92	3	3	120	1.2	0.182999	0.94	1.07667	1.14539	0.737551
3840.1	sp|Q9VD26|ZFPL1_DROME	Zinc finger protein-like 1 homolog OS=Drosophila melanogaster GN=CG5382 PE=1 SV=1	1.02	0.97	0.92	0.97	1.1	1.07	0.95	3	2	33	4.5	0.183056	0.97	1.04	1.07216	0.737416
709.1	sp|Q9V4I1|CP9B2_DROME	Cytochrome P450 9b2 OS=Drosophila melanogaster GN=Cyp9b2 PE=1 SV=1	1.02	0.94	1.03	0.89	0.99	1.05	1.08	41	15	59	34.8	0.183056	0.97	1.04	1.07216	0.737416
2065.1	tr|Q7K0W4|Q7K0W4_DROME	CG30101 OS=Drosophila melanogaster GN=CG6564 PE=2 SV=1	1.05	1	0.95	1.28	1.05	0.86	0.81	11	3	38	14.4	0.18314	1.07	0.906667	0.847352	0.737216
5456.1	sp|Q9V439|MED22_DROME	Mediator of RNA polymerase II transcription subunit 22 OS=Drosophila melanogaster GN=MED22 PE=1 SV=1	1.18	0.8	0.91	0.7	1.35	1	1.05	1	1	17	3	0.183396	0.8975	1.13333	1.26277	0.736611
5063.1	tr|Q9W308|Q9W308_DROME	CG9689 OS=Drosophila melanogaster GN=CG9689 PE=2 SV=1	1.22	1	1.21	0.87	1.02	0.81	0.87	1	1	19	2.6	0.183552	1.075	0.9	0.837209	0.736242
2576.1	sp|Q9VDQ7|NAA25_DROME	Phagocyte signaling-impaired protein OS=Drosophila melanogaster GN=psidin PE=2 SV=1	1.02	1.02	1.07	1.04	1.02	1.01	0.81	7	5	109	3.2	0.183709	1.0375	0.946667	0.91245	0.735869
3206.1	tr|Q9W0X8|Q9W0X8_DROME	CG2790 OS=Drosophila melanogaster GN=BcDNA:GH03108 PE=2 SV=1	1.04	0.84	1.05	0.9	1.12	1.03	1.03	4	4	63	3.2	0.183722	0.9575	1.06	1.10705	0.73584
5733.1	tr|Q9VUR6|Q9VUR6_DROME	RhoGAP71E, isoform C OS=Drosophila melanogaster GN=RhoGAP71E PE=2 SV=2	1.09	0.69	1.33	1.49	0.69	1.02	0.7	1	1	98	0.5	0.183901	1.15	0.803333	0.698551	0.735416
200.1	tr|Q9VXJ0|Q9VXJ0_DROME	CG3415 OS=Drosophila melanogaster GN=CG3415 PE=1 SV=1	1.01	0.93	1.01	0.98	1	1.04	1.02	134	23	64	104.6	0.183918	0.9825	1.02	1.03817	0.735375
2422.1	tr|A8DY95|A8DY95_DROME	CG11883, isoform C OS=Drosophila melanogaster GN=CG11883 PE=3 SV=1	0.93	0.92	1.04	0.97	1.05	1.11	0.96	8	5	86	4.7	0.183918	0.965	1.04	1.07772	0.735375
1147.1	sp|P00399|COX1_DROME	Cytochrome c oxidase subunit 1 OS=Drosophila melanogaster GN=mt:CoI PE=3 SV=1	0.85	0.96	1.04	0.99	1.03	0.99	1.14	25	4	56	22.1	0.184088	0.96	1.05333	1.09722	0.734975
189.1	sp|P82147|L2EFL_DROME	Protein lethal(2)essential for life OS=Drosophila melanogaster GN=l(2)efl PE=1 SV=1	1.02	0.91	1.05	0.88	1.06	1.01	1.06	146	14	21	342.8	0.1841	0.965	1.04333	1.08117	0.734945
3710.1	sp|Q9NDJ2-2|DOM_DROME	Isoform B of Helicase domino OS=Drosophila melanogaster GN=dom	0.99	0.96	1.04	0.87	1.02	1.11	1	3	3	274	0.6	0.1841	0.965	1.04333	1.08117	0.734945
2593.1	sp|Q9V535|RBM8A_DROME	RNA-binding protein 8A OS=Drosophila melanogaster GN=tsu PE=1 SV=1	0.92	0.89	1.11	0.91	1.1	1.01	1.06	7	4	19	18.4	0.184184	0.9575	1.05667	1.10357	0.734748
670.2	tr|Q8SY70|Q8SY70_DROME	Microsomal glutathione S-transferase-like, isoform B OS=Drosophila melanogaster GN=Mgstl PE=2 SV=1	0.98	0.82	1.07	0.96	1.09	1.01	1.07	4	2	17	11.9	0.184184	0.9575	1.05667	1.10357	0.734748
5554.1	tr|E1JIS4|E1JIS4_DROME	CG34034, isoform B OS=Drosophila melanogaster GN=CG34034 PE=4 SV=1	0.79	0.63	0.81	1.02	0.91	0.95	1.89	1	1	15	3.3	0.184264	0.8125	1.25	1.53846	0.734559
2732.1	sp|Q961G1|COG3_DROME	Conserved oligomeric Golgi complex subunit 3 OS=Drosophila melanogaster GN=Cog3 PE=1 SV=1	0.97	0.81	0.89	1.11	1.1	1.11	1	6	6	101	3	0.184277	0.945	1.07	1.13228	0.734528
5277.1	sp|Q27377|OB10_DROME	Putative odorant-binding protein A10 OS=Drosophila melanogaster GN=a10 PE=1 SV=2	0.93	0.84	0.96	1.05	1.18	1.12	0.92	1	1	18	2.8	0.184318	0.945	1.07333	1.1358	0.734433
3449.1	tr|E1JHN0|E1JHN0_DROME	CG14397 OS=Drosophila melanogaster GN=CG14397 PE=4 SV=1	0.97	0.86	0.99	1.04	1.09	1.07	0.98	4	2	12	16.1	0.184655	0.965	1.04667	1.08463	0.733639
5373.1	sp|Q8SWV6|FICD_DROME	Adenosine monophosphate-protein transferase FICD homolog OS=Drosophila melanogaster GN=CG9523 PE=1 SV=1	0.9	0.96	0.95	0.87	1.39	0.98	0.95	1	1	56	0.9	0.184667	0.92	1.10667	1.2029	0.733611
137.1	tr|B7YZD8|B7YZD8_DROME	CAP, isoform Q OS=Drosophila melanogaster GN=CAP PE=4 SV=2	1	0.92	1.05	0.94	1.04	1.01	1.05	198	55	272	36.4	0.185397	0.9775	1.03333	1.05712	0.731897
2391.1	tr|A8DYX9|A8DYX9_DROME	CG34398, isoform C OS=Drosophila melanogaster GN=CG34398 PE=4 SV=1	1.04	0.8	1.02	0.94	1.15	1.09	0.97	8	6	197	2	0.18543	0.95	1.07	1.12632	0.731819
811.1	tr|Q9VU75|Q9VU75_DROME	CG14109 OS=Drosophila melanogaster GN=CG14109 PE=2 SV=1	0.95	0.94	1.07	0.91	1.08	0.98	1.07	36	7	27	66.1	0.185566	0.9675	1.04333	1.07838	0.731501
27.2	tr|Q8IQQ0|Q8IQQ0_DROME	Neural conserved at 73EF, isoform F OS=Drosophila melanogaster GN=Nc73EF PE=2 SV=1	1	0.93	1.03	0.98	1.02	1.03	1.02	924	40	114	406.9	0.186098	0.985	1.02333	1.03892	0.730259
2200.1	tr|A8DYC5|A8DYC5_DROME	CG34439, isoform A OS=Drosophila melanogaster GN=CG34439-RA PE=4 SV=1	1.21	1.08	1.02	0.93	1.06	0.87	0.83	10	2	9	58.3	0.186142	1.06	0.92	0.867925	0.730155
4703.1	tr|Q7JXU4|Q7JXU4_DROME	Nuclear GTP binding protein OS=Drosophila melanogaster GN=ns2 PE=2 SV=1	1.19	1.16	0.86	1.03	0.86	0.98	0.91	1	1	77	0.7	0.186183	1.06	0.916667	0.86478	0.73006
147.1	tr|Q0KIA8|Q0KIA8_DROME	CG1041, isoform B OS=Drosophila melanogaster GN=CG1041 PE=3 SV=1	0.99	0.92	1.05	0.95	1.05	1.02	1.02	187	26	74	125.9	0.186256	0.9775	1.03	1.05371	0.729889
656.1	tr|Q9VCR2|Q9VCR2_DROME	CG6726, isoform A OS=Drosophila melanogaster GN=CG6726 PE=2 SV=2	0.86	0.99	0.95	1.05	1.09	1.07	0.98	44	15	45	48.9	0.18659	0.9625	1.04667	1.08745	0.729111
1168.3	tr|Q7JYX2|Q7JYX2_DROME	CG2065 OS=Drosophila melanogaster GN=CG2065 PE=2 SV=1	1.01	0.96	1.02	0.96	1.02	1	1.04	12	4	33	18	0.186923	0.9875	1.02	1.03291	0.728337
3032.1	tr|A8Y582|A8Y582_DROME	CG41099, isoform D OS=Drosophila melanogaster GN=CG41099 PE=4 SV=1	0.99	0.91	1.03	0.9	1.05	1.17	0.95	5	4	124	2	0.18725	0.9575	1.05667	1.10357	0.727579
2612.1	tr|Q9W018|Q9W018_DROME	CG13800 OS=Drosophila melanogaster GN=CG13800 PE=2 SV=3	0.99	0.88	1.04	0.94	1.06	1.14	0.96	7	4	213	1.6	0.187365	0.9625	1.05333	1.09437	0.727312
541.1	tr|Q9VMQ9|Q9VMQ9_DROME	Clot OS=Drosophila melanogaster GN=cl PE=2 SV=1	0.99	0.9	1.06	0.94	1.02	1.06	1.03	55	7	15	187.7	0.187367	0.9725	1.03667	1.06598	0.727306
840.1	sp|Q24208|IF2G_DROME	Eukaryotic translation initiation factor 2 subunit 3 OS=Drosophila melanogaster GN=Su(var)3-9 PE=2 SV=1	0.94	0.96	1.04	0.99	1.01	1.04	1.02	34	14	51	33	0.187665	0.9825	1.02333	1.04156	0.726617
1176.1	tr|Q9W445|Q9W445_DROME	CG5941 OS=Drosophila melanogaster GN=CG5941 PE=2 SV=1	0.96	0.97	1.02	0.98	0.98	1.07	1.02	24	6	20	59	0.187665	0.9825	1.02333	1.04156	0.726617
2847.1	tr|Q9VMD5|Q9VMD5_DROME	CG9526, isoform A OS=Drosophila melanogaster GN=frj PE=2 SV=1	1.03	0.85	1.08	0.85	1.1	1.05	1.04	6	3	56	5.3	0.188046	0.9525	1.06333	1.11636	0.725735
2147.1	tr|Q7JVG2|Q7JVG2_DROME	Aps, isoform A OS=Drosophila melanogaster GN=Aps PE=2 SV=1	0.95	0.82	1.08	0.96	1.15	1.03	1.01	10	5	20	25.2	0.188046	0.9525	1.06333	1.11636	0.725735
3932.1	tr|Q9VBA6|Q9VBA6_DROME	CG5500 OS=Drosophila melanogaster GN=CG5500 PE=2 SV=1	0.92	0.9	1.1	0.93	1.09	1.02	1.04	3	1	18	8.3	0.188144	0.9625	1.05	1.09091	0.72551
109.3	tr|Q0E8H3|Q0E8H3_DROME	Ank2, isoform I OS=Drosophila melanogaster GN=Ank2 PE=4 SV=2	0.96	0.95	1.04	0.95	1.1	1.01	0.99	37	19	275	6.7	0.188144	0.975	1.03333	1.05983	0.72551
3741.1	tr|Q9VLR8|Q9VLR8_DROME	CG8451 OS=Drosophila melanogaster GN=CG8451 PE=2 SV=2	1.02	1.05	0.97	1.13	0.82	1	1.01	3	2	65	2.3	0.188266	1.0425	0.943333	0.904876	0.725229
864.1	tr|Q9VIE7|Q9VIE7_DROME	Burgundy OS=Drosophila melanogaster GN=bur PE=2 SV=3	1.01	0.89	1.06	0.88	1.12	0.99	1.05	33	14	77	21.5	0.188693	0.96	1.05333	1.09722	0.724244
794.1	tr|Q9VXK7|Q9VXK7_DROME	CG9172, isoform A OS=Drosophila melanogaster GN=CG9172 PE=2 SV=1	0.93	0.99	1.01	0.99	1.01	0.99	1.08	37	6	25	75.3	0.188693	0.98	1.02667	1.04762	0.724244
3085.1	tr|O76752|O76752_DROME	CG12117-PA OS=Drosophila melanogaster GN=Sptr PE=2 SV=1	1	0.9	1.08	0.82	1.08	0.98	1.15	5	3	29	8.6	0.188905	0.95	1.07	1.12632	0.723757
857.1	tr|Q9VV21|Q9VV21_DROME	CG4962 OS=Drosophila melanogaster GN=CG4962 PE=2 SV=1	0.97	1	1.03	1.12	1	0.98	0.9	34	1	12	136.4	0.189201	1.03	0.96	0.932039	0.723077
3686.1	tr|Q8IRK7|Q8IRK7_DROME	Misexpression suppressor of KSR 2, isoform D OS=Drosophila melanogaster GN=MESK2 PE=2 SV=2	0.96	0.86	1.04	0.97	1.17	0.98	1.02	3	3	40	3.7	0.189278	0.9575	1.05667	1.10357	0.722899
1905.1	sp|Q9VVE2-2|ROGDI_DROME	Isoform 2 of Protein rogdi OS=Drosophila melanogaster GN=rogdi	0.96	0.84	1.08	0.95	1.04	1.01	1.11	12	6	39	15.5	0.189361	0.9575	1.05333	1.10009	0.722709
3581.1	tr|Q9U9Q2|Q9U9Q2_DROME	Neosin OS=Drosophila melanogaster GN=Neos PE=2 SV=1	1.01	1.07	1.09	0.98	0.93	1.06	0.86	3	3	41	3.6	0.189444	1.0375	0.95	0.915663	0.722518
3214.1	tr|Q9W5Y0|Q9W5Y0_DROME	Neprilysin 3 OS=Drosophila melanogaster GN=Nep3 PE=2 SV=2	1.09	0.86	1	0.85	1.09	0.98	1.14	4	4	90	2.2	0.189595	0.95	1.07	1.12632	0.722172
1083.1	tr|Q9VIC9|Q9VIC9_DROME	CG8665 OS=Drosophila melanogaster GN=CG8665 PE=1 SV=3	1.02	0.87	1.09	0.83	1.05	1.08	1.06	26	13	100	13	0.189667	0.9525	1.06333	1.11636	0.722008
965.1	tr|Q9VNF8|Q9VNF8_DROME	Sec23, isoform A OS=Drosophila melanogaster GN=sec23 PE=2 SV=2	0.95	0.91	1.06	0.93	1.16	1.01	0.99	30	8	87	17.3	0.18978	0.9625	1.05333	1.09437	0.721749
2485.1	tr|Q9W259|Q9W259_DROME	CG13506 OS=Drosophila melanogaster GN=CG13506 PE=2 SV=2	0.97	0.93	1.01	0.98	1.06	1.1	0.95	8	3	57	7	0.189788	0.9725	1.03667	1.06598	0.721732
149.1	tr|Q9VNW6|Q9VNW6_DROME	CG7470 OS=Drosophila melanogaster GN=CG7470 PE=2 SV=1	1.03	0.86	1.06	0.85	1.06	0.99	1.14	184	23	84	109.5	0.189815	0.95	1.06333	1.1193	0.72167
3855.1	tr|Q9W321|Q9W321_DROME	Nejire OS=Drosophila melanogaster GN=nej PE=2 SV=2	0.9	0.87	0.92	1.06	1.28	0.99	0.98	3	2	341	0.4	0.190015	0.9375	1.08333	1.15556	0.721212
308.1	tr|Q9W3L4|Q9W3L4_DROME	CG2233 OS=Drosophila melanogaster GN=CG2233 PE=2 SV=1	1.04	0.83	1.08	0.73	1.04	1	1.28	92	10	46	99	0.190119	0.92	1.10667	1.2029	0.720973
5604.1	tr|E1JHS8|E1JHS8_DROME	Cep97, isoform D OS=Drosophila melanogaster GN=Cep97 PE=4 SV=1	0.99	0.73	1.07	0.94	0.96	1.2	1.11	1	1	34	1.5	0.190277	0.9325	1.09	1.1689	0.720614
1954.1	tr|Q9W306|Q9W306_DROME	CG9691, isoform A OS=Drosophila melanogaster GN=CG9691 PE=2 SV=1	0.74	0.98	1.06	0.98	1.05	1.01	1.18	12	2	13	46.5	0.19072	0.94	1.08	1.14894	0.719604
4738.1	sp|Q9VE61|RN181_DROME	E3 ubiquitin-protein ligase CG7694 OS=Drosophila melanogaster GN=CG7694 PE=2 SV=1	0.97	1.01	1.01	0.77	1	1.23	1.01	1	1	17	2.9	0.19072	0.94	1.08	1.14894	0.719604
878.1	sp|Q9VV43|Y4893_DROME	TPPP family protein CG4893 OS=Drosophila melanogaster GN=CG4893 PE=2 SV=1	0.89	1	1	0.99	1	1.11	1	33	6	21	80.2	0.190972	0.97	1.03667	1.06873	0.71903
5644.1	tr|Q0E8I8|Q0E8I8_DROME	Shaker cognate b, isoform C OS=Drosophila melanogaster GN=Shab PE=4 SV=1	1.03	0.93	1.01	0.88	1.14	1.06	0.96	1	1	110	0.5	0.190982	0.9625	1.05333	1.09437	0.719008
25.1	sp|P07487|G3P2_DROME	Glyceraldehyde-3-phosphate dehydrogenase 2 OS=Drosophila melanogaster GN=Gapdh2 PE=1 SV=2	0.99	0.94	1.01	0.99	1.03	1.05	0.98	1083	19	35	1531.9	0.191027	0.9825	1.02	1.03817	0.718905
3536.1	tr|Q8IP30|Q8IP30_DROME	CG4793 OS=Drosophila melanogaster GN=CG4793 PE=3 SV=2	0.99	0.89	1.03	0.99	1.02	1.01	1.07	4	1	97	2	0.191063	0.975	1.03333	1.05983	0.718823
1415.1	tr|Q7JR49|Q7JR49_DROME	CG8029, isoform A OS=Drosophila melanogaster GN=VhaAC45 PE=2 SV=1	1.01	0.89	1.05	0.93	1.08	1.02	1.02	19	5	41	23.1	0.191225	0.97	1.04	1.07216	0.718456
249.1	sp|P46461|NSF1_DROME	Vesicle-fusing ATPase 1 OS=Drosophila melanogaster GN=comt PE=1 SV=1	1	0.96	1.02	0.96	1.03	1.03	0.99	107	26	83	64.8	0.19128	0.985	1.01667	1.03215	0.718329
3907.1	tr|E1JIP9|E1JIP9_DROME	Unc79, isoform B OS=Drosophila melanogaster GN=unc79 PE=4 SV=1	0.96	1.02	0.97	0.99	1.05	1	1	3	2	308	0.5	0.19128	0.985	1.01667	1.03215	0.718329
252.1	tr|Q9VQF7|Q9VQF7_DROME	CG9894, isoform A OS=Drosophila melanogaster GN=CG9894-RB PE=2 SV=1	0.93	0.9	1.09	0.91	1.07	0.97	1.13	107	3	15	346.2	0.191294	0.9575	1.05667	1.10357	0.718298
4844.1	tr|Q9VBX6|Q9VBX6_DROME	CG13650 OS=Drosophila melanogaster GN=CG13650 PE=2 SV=2	1.04	0.86	1.03	0.9	1.12	1.08	0.97	1	1	83	0.6	0.191294	0.9575	1.05667	1.10357	0.718298
2686.1	tr|Q8IQD8|Q8IQD8_DROME	Scramblase 1, isoform C OS=Drosophila melanogaster GN=scramb1 PE=2 SV=1	1.02	0.87	1.06	0.88	1.05	0.99	1.14	7	3	37	9.4	0.191333	0.9575	1.06	1.10705	0.718211
5606.1	tr|Q9W481|Q9W481_DROME	CG15771, isoform A OS=Drosophila melanogaster GN=CG15771 PE=2 SV=2	0.91	1.21	1.03	1.14	0.99	1.01	0.7	1	1	40	1.2	0.191452	1.0725	0.9	0.839161	0.717939
3642.1	tr|Q9VZH5|Q9VZH5_DROME	CG1299 OS=Drosophila melanogaster GN=CG1299 PE=2 SV=2	0.99	1.03	0.97	0.93	1.08	0.99	1.02	3	3	56	2.7	0.191467	0.98	1.03	1.05102	0.717907
958.6	sp|Q9V774|C6A21_DROME	Probable cytochrome P450 6a21 OS=Drosophila melanogaster GN=Cyp6a21 PE=2 SV=1	0.99	0.88	1	0.94	1.08	0.92	1.18	12	9	58	10.4	0.191567	0.9525	1.06	1.11286	0.717679
523.1	tr|A8JUQ2|A8JUQ2_DROME	CG7378, isoform B OS=Drosophila melanogaster GN=CG7378 PE=4 SV=1	0.97	0.96	1.04	0.95	1.06	1.01	1	56	13	26	109	0.19163	0.98	1.02333	1.04422	0.717536
3805.1	tr|Q9VGW7|Q9VGW7_DROME	Arginine methyltransferase 1 OS=Drosophila melanogaster GN=Art1 PE=2 SV=1	0.87	0.95	0.98	1.02	1.04	1.2	0.95	3	2	43	3.5	0.19163	0.955	1.06333	1.11344	0.717536
5548.1	tr|B7Z0Q2|B7Z0Q2_DROME	5PtaseI, isoform C OS=Drosophila melanogaster GN=5PtaseI PE=4 SV=1	0.94	0.88	1.09	0.91	1.06	0.97	1.16	1	1	79	0.6	0.19163	0.955	1.06333	1.11344	0.717536
5139.1	tr|Q7KTI0|Q7KTI0_DROME	1-acylglycerol-3-phosphate O-acyltransferase OS=Drosophila melanogaster GN=fu12 PE=2 SV=1	0.95	0.96	1.07	0.87	0.99	1.12	1.04	1	1	31	1.6	0.192031	0.9625	1.05	1.09091	0.71663
1644.1	tr|Q7YTY6|Q7YTY6_DROME	GH04125p OS=Drosophila melanogaster GN=Spn1 PE=2 SV=1	0.92	0.8	1.12	0.85	1.06	0.95	1.3	15	5	41	18.2	0.192051	0.9225	1.10333	1.19603	0.716584
2468.1	sp|Q03751|CSP_DROME	Cysteine string protein OS=Drosophila melanogaster GN=Csp PE=1 SV=1	0.87	0.92	0.98	1.07	1.07	1.13	0.97	8	4	27	14.9	0.192161	0.96	1.05667	1.10069	0.716334
3115.1	tr|Q5LJP6|Q5LJP6_DROME	CG17698, isoform B OS=Drosophila melanogaster GN=CG17698 PE=2 SV=1	1	0.89	1.03	0.95	1.08	1.09	0.96	5	3	76	3.3	0.192488	0.9675	1.04333	1.07838	0.715597
4729.1	tr|B7YZJ3|B7YZJ3_DROME	CG42239 OS=Drosophila melanogaster GN=CG42239 PE=4 SV=1	0.94	0.95	0.97	1.05	1.01	1.06	1.01	1	1	8	6.3	0.192535	0.9775	1.02667	1.0503	0.71549
4123.1	tr|Q9VN01|Q9VN01_DROME	CG9780 OS=Drosophila melanogaster GN=CG9780 PE=2 SV=1	1.1	1.07	1.07	0.95	1.08	0.83	0.9	2	2	67	1.5	0.192886	1.0475	0.936667	0.894193	0.7147
4460.1	tr|Q9V445|Q9V445_DROME	CG15255 OS=Drosophila melanogaster GN=CG15255 PE=2 SV=1	0.82	0.92	1.09	0.97	0.98	1.12	1.09	2	1	29	3.4	0.192892	0.95	1.06333	1.1193	0.714685
3014.1	tr|Q9VI65|Q9VI65_DROME	CG10068 OS=Drosophila melanogaster GN=CG10068 PE=2 SV=1	1.01	0.87	1.08	0.86	1.11	1.03	1.03	5	4	37	6.8	0.192911	0.955	1.05667	1.10646	0.714643
4235.1	tr|Q9VWN4|Q9VWN4_DROME	CG7358 OS=Drosophila melanogaster GN=CG7358 PE=2 SV=1	0.89	0.65	1.14	0.8	1.53	1.12	0.87	2	2	129	0.8	0.192915	0.87	1.17333	1.34866	0.714633
2411.1	tr|Q7KVQ8|Q7KVQ8_DROME	CG1628 OS=Drosophila melanogaster GN=CG1628 PE=2 SV=1	0.93	0.92	1.08	0.95	1.03	1.03	1.05	8	5	50	8	0.193191	0.97	1.03667	1.06873	0.714014
2514.1	tr|Q7JVK1|Q7JVK1_DROME	HL07956p OS=Drosophila melanogaster GN=mRpL18 PE=2 SV=1	0.99	0.98	1.08	1.12	0.99	1.02	0.81	8	2	21	18.9	0.193209	1.0425	0.94	0.901679	0.713974
1205.1	sp|Q9VLJ6|ACER_DROME	Angiotensin-converting enzyme-related protein OS=Drosophila melanogaster GN=Acer PE=1 SV=1	0.99	0.95	1.04	0.94	1.04	0.99	1.05	23	8	73	15.8	0.193236	0.98	1.02667	1.04762	0.713912
3264.1	tr|B7YZE7|B7YZE7_DROME	I[[h]] channel, isoform F OS=Drosophila melanogaster GN=Ih PE=4 SV=1	1	0.84	1.05	0.94	1.05	0.98	1.14	4	4	144	1.4	0.193298	0.9575	1.05667	1.10357	0.713772
4940.1	tr|Q7K4R2|Q7K4R2_DROME	CG11504, isoform A OS=Drosophila melanogaster GN=CG11504-RA PE=2 SV=1	1.01	1.02	1	1.23	0.73	1.02	0.99	1	1	46	1.1	0.193343	1.065	0.913333	0.85759	0.713672
4409.1	tr|A8DY49|A8DY49_DROME	CG34215 OS=Drosophila melanogaster GN=CG34215 PE=4 SV=1	0.65	0.88	1.14	0.98	0.98	1.14	1.23	2	1	11	8.9	0.193369	0.9125	1.11667	1.22374	0.713614
258.1	sp|Q9VXF1|PP2B3_DROME	Serine/threonine-protein phosphatase 2B catalytic subunit 3 OS=Drosophila melanogaster GN=CanA-14F PE=1 SV=4	0.99	0.94	1.03	0.97	1.06	1	1.01	104	18	64	80.9	0.193604	0.9825	1.02333	1.04156	0.713086
2287.1	tr|E1JIE0|E1JIE0_DROME	Multiplexin, isoform M OS=Drosophila melanogaster GN=mp PE=4 SV=1	1.01	0.96	1.02	0.94	1.03	0.99	1.05	9	5	107	4.2	0.193604	0.9825	1.02333	1.04156	0.713086
2234.1	tr|Q9VJ95|Q9VJ95_DROME	CG7180 OS=Drosophila melanogaster GN=CG7180 PE=2 SV=2	1.03	0.89	1.03	0.93	1.1	1.03	1	9	6	79	5.7	0.19372	0.97	1.04333	1.0756	0.712825
1264.1	tr|Q961A8|Q961A8_DROME	LD25351p OS=Drosophila melanogaster GN=Papss PE=2 SV=1	1.04	0.9	0.99	0.97	1.05	1.06	0.99	21	14	71	14.8	0.193957	0.975	1.03333	1.05983	0.712294
5600.1	sp|A1A708-2|Y4951_DROME	Isoform A of Uncharacterized protein CG4951 OS=Drosophila melanogaster GN=CG4951	1.1	0.84	1.03	0.72	1.23	0.97	1.11	1	1	36	1.4	0.194155	0.9225	1.10333	1.19603	0.711852
5337.1	tr|Q8INA0|Q8INA0_DROME	CG31267 OS=Drosophila melanogaster GN=CG31267 PE=2 SV=1	1.11	1.02	0.96	1.04	0.91	1.04	0.92	1	1	30	1.7	0.194196	1.0325	0.956667	0.926554	0.711761
1887.1	tr|Q9W2U7|Q9W2U7_DROME	CG17255, isoform A OS=Drosophila melanogaster GN=nocte PE=2 SV=4	0.96	0.89	1.08	0.94	1.08	1.01	1.04	12	7	235	2.5	0.194196	0.9675	1.04333	1.07838	0.711761
1461.1	sp|Q9NFP5|SH3BG_DROME	SH3 domain-binding glutamic acid-rich protein homolog OS=Drosophila melanogaster GN=Sh3beta PE=1 SV=2	1	0.93	1.02	0.92	1.15	1.01	0.98	18	5	17	51.5	0.19442	0.9675	1.04667	1.08183	0.71126
2311.1	tr|Q9VW66|Q9VW66_DROME	CG7646, isoform A OS=Drosophila melanogaster GN=CG7646 PE=1 SV=1	0.89	0.99	1.04	0.97	0.99	1.08	1.04	9	4	21	21	0.194576	0.9725	1.03667	1.06598	0.710912
4531.1	tr|Q9W3S3|Q9W3S3_DROME	CG8300 OS=Drosophila melanogaster GN=CG8300 PE=2 SV=1	0.93	0.88	1.03	1.01	1.13	1.06	0.96	2	1	20	5	0.194597	0.9625	1.05	1.09091	0.710865
4706.1	tr|A1ZAL1|A1ZAL1_DROME	CG6421 OS=Drosophila melanogaster GN=CG6421 PE=4 SV=1	1.03	0.82	0.93	1.01	1.21	0.98	1.02	1	1	18	2.8	0.19491	0.9475	1.07	1.12929	0.710167
2386.1	sp|P18824|ARM_DROME	Armadillo segment polarity protein OS=Drosophila melanogaster GN=arm PE=1 SV=1	1.05	0.98	0.98	0.89	1.07	1.02	1.02	8	6	91	4.4	0.194932	0.975	1.03667	1.06325	0.710117
3727.1	sp|Q9VQ57|DERL1_DROME	Derlin-1 OS=Drosophila melanogaster GN=CG10908 PE=2 SV=1	1.04	0.9	1.01	0.95	1.08	1.01	1.02	3	2	28	5.3	0.194932	0.975	1.03667	1.06325	0.710117
34.1	tr|Q9VFF0|Q9VFF0_DROME	CG3731, isoform A OS=Drosophila melanogaster GN=CG3731 PE=2 SV=2	1	0.91	1.02	0.98	1.04	1.08	0.98	878	19	52	846.8	0.19494	0.9775	1.03333	1.05712	0.710099
181.1	sp|P17336|CATA_DROME	Catalase OS=Drosophila melanogaster GN=Cat PE=1 SV=2	1.05	0.93	1	0.93	1.05	1.05	1	152	18	57	133.1	0.19494	0.9775	1.03333	1.05712	0.710099
1735.1	tr|Q9W5W7|Q9W5W7_DROME	CG9581 OS=Drosophila melanogaster GN=CG9581 PE=2 SV=1	1.02	0.92	1.02	0.95	1.06	1.06	0.98	14	4	61	11.5	0.19494	0.9775	1.03333	1.05712	0.710099
393.1	sp|Q9V3D4|IDGF2_DROME	Chitinase-like protein Idgf2 OS=Drosophila melanogaster GN=Idgf2 PE=1 SV=1	1.02	0.91	1.04	0.89	1	1.02	1.12	75	13	49	76.3	0.195072	0.965	1.04667	1.08463	0.709804
3091.1	tr|Q9V9U1|Q9V9U1_DROME	FI02923p OS=Drosophila melanogaster GN=Smvt PE=2 SV=1	0.89	0.97	0.99	1.01	1.16	1.02	0.97	5	3	65	3.9	0.195097	0.965	1.05	1.08808	0.709749
4800.1	sp|Q9VJQ5|NC2B_DROME	Protein Dr1 OS=Drosophila melanogaster GN=NC2beta PE=1 SV=1	0.97	0.96	1.02	0.99	0.98	1.05	1.03	1	1	21	2.4	0.195235	0.985	1.02	1.03553	0.709442
429.1	tr|Q9Y112|Q9Y112_DROME	BcDNA.GH10614 OS=Drosophila melanogaster GN=BcDNA.GH10614 PE=2 SV=1	1.01	0.91	1.04	0.92	1.09	1.05	0.98	70	11	36	96.4	0.195235	0.97	1.04	1.07216	0.709442
958.8	sp|Q9VB31|C6A18_DROME	Probable cytochrome P450 6a18 OS=Drosophila melanogaster GN=Cyp6a18 PE=2 SV=1	0.86	1	0.98	1.04	1.04	1.06	1.02	6	3	58	5.2	0.195235	0.97	1.04	1.07216	0.709442
800.1	sp|Q09332|UGGG_DROME	UDP-glucose:glycoprotein glucosyltransferase OS=Drosophila melanogaster GN=Ugt PE=1 SV=2	1.05	0.88	1.01	0.94	1.07	1.04	1.01	36	15	174	10.3	0.195235	0.97	1.04	1.07216	0.709442
2687.1	sp|Q8IQG1-4|MOB2_DROME	Isoform C of Mps one binder kinase activator-like 2 OS=Drosophila melanogaster GN=Mob2	1.01	1	1.01	1.04	0.95	1.03	0.96	7	3	46	7.6	0.195235	1.015	0.98	0.965517	0.709442
5303.1	tr|B7Z083|B7Z083_DROME	CG8786, isoform E OS=Drosophila melanogaster GN=CG8786 PE=4 SV=1	0.83	0.66	1.14	1	1.29	0.98	1.1	1	1	53	0.9	0.195247	0.9075	1.12333	1.23783	0.709416
1475.1	tr|Q9W3M3|Q9W3M3_DROME	CG42593 OS=Drosophila melanogaster GN=CG42593 PE=4 SV=4	1	0.86	1.08	0.89	1.08	1.1	0.99	17	13	247	3.4	0.19529	0.9575	1.05667	1.10357	0.709319
5167.1	tr|Q95U32|Q95U32_DROME	CG31344 OS=Drosophila melanogaster GN=Rpb7 PE=2 SV=1	0.94	0.98	0.9	0.94	1.13	1.24	0.87	1	1	46	1.1	0.195733	0.94	1.08	1.14894	0.708336
5177.1	tr|Q7KSK1|Q7KSK1_DROME	Serine-peptidase 212 OS=Drosophila melanogaster GN=Sp212 PE=3 SV=2	1.07	0.87	0.92	0.97	1.01	1.16	1	1	1	57	0.9	0.196282	0.9575	1.05667	1.10357	0.70712
1874.1	tr|A8DYE0|A8DYE0_DROME	CG10249, isoform D OS=Drosophila melanogaster GN=CG10249-RD PE=2 SV=1	0.92	0.9	1.1	0.92	1.11	1.06	0.99	12	8	147	4.1	0.196602	0.96	1.05333	1.09722	0.706411
3989.1	tr|Q9W3Y8|Q9W3Y8_DROME	CG17717, isoform A OS=Drosophila melanogaster GN=CG17717 PE=2 SV=1	1.01	0.98	0.98	0.93	0.96	1.1	1.04	3	1	30	5	0.196826	0.975	1.03333	1.05983	0.705918
4179.1	sp|P18487|A37C_DROME	Protein anon-37Cs OS=Drosophila melanogaster GN=anon-37Cs PE=2 SV=3	1.09	0.98	1.02	1.05	1.02	1	0.85	2	2	56	1.8	0.197013	1.035	0.956667	0.924316	0.705505
789.1	sp|P55935|RS9_DROME	40S ribosomal protein S9 OS=Drosophila melanogaster GN=RpS9 PE=1 SV=2	0.98	1.09	1.01	1.07	1	1.02	0.83	37	10	23	81.8	0.197143	1.0375	0.95	0.915663	0.705219
1899.1	tr|Q9VH26|Q9VH26_DROME	CG3940 OS=Drosophila melanogaster GN=CG3940 PE=2 SV=2	0.79	0.93	1.08	0.95	1.11	0.93	1.21	12	6	34	17.7	0.197396	0.9375	1.08333	1.15556	0.704661
535.1	tr|A1Z6L9|A1Z6L9_DROME	Trap1 OS=Drosophila melanogaster GN=Trap1 PE=3 SV=1	0.96	0.94	1.04	0.98	1.07	1.01	1	55	20	78	35.3	0.197717	0.98	1.02667	1.04762	0.703956
715.1	tr|O62530|O62530_DROME	AP-50, isoform A OS=Drosophila melanogaster GN=AP-50 PE=2 SV=1	0.97	0.96	1.04	0.95	1.06	0.98	1.04	41	10	50	41.1	0.197717	0.98	1.02667	1.04762	0.703956
2405.1	tr|Q9W1F5|Q9W1F5_DROME	CG3803 OS=Drosophila melanogaster GN=CG3803 PE=2 SV=1	1.1	0.75	1.02	0.83	1.23	1.12	0.95	8	5	44	9	0.197776	0.925	1.1	1.18919	0.703826
4064.1	sp|Q24418|NMDA1_DROME	Glutamate [NMDA] receptor subunit 1 OS=Drosophila melanogaster GN=Nmdar1 PE=1 SV=1	1.04	0.86	1.01	0.96	1.01	1.04	1.07	2	2	112	0.9	0.198085	0.9675	1.04	1.07494	0.703148
3477.1	tr|Q9VJI7|Q9VJI7_DROME	LSm7 OS=Drosophila melanogaster GN=LSm7 PE=2 SV=1	0.93	0.83	1.07	0.95	1.15	0.92	1.15	4	2	12	16.4	0.198708	0.945	1.07333	1.1358	0.701784
3422.1	sp|Q9VS97|PGPSD_DROME	Peptidoglycan-recognition protein SD OS=Drosophila melanogaster GN=PGRP-SD PE=1 SV=1	1.1	1	1.12	0.92	0.99	0.93	0.93	4	2	20	9.9	0.199129	1.035	0.95	0.917874	0.700866
2475.1	tr|Q7KRX5|Q7KRX5_DROME	Barentsz, isoform B OS=Drosophila melanogaster GN=btz PE=2 SV=1	0.92	0.91	1.08	0.95	1.08	1.1	0.97	8	4	86	4.7	0.199129	0.965	1.05	1.08808	0.700866
897.1	tr|Q9VJH8|Q9VJH8_DROME	FI03416p OS=Drosophila melanogaster GN=Ugt36Bc PE=2 SV=1	0.96	0.91	1.09	0.92	1.06	1.04	1.03	32	11	60	26.4	0.199148	0.97	1.04333	1.0756	0.700824
27.1	tr|A8JNU6|A8JNU6_DROME	Neural conserved at 73EF, isoform I OS=Drosophila melanogaster GN=Nc73EF PE=4 SV=1	1	0.92	1.03	0.98	1.02	1.03	1.02	1070	42	123	435.6	0.199438	0.9825	1.02333	1.04156	0.700192
3599.1	tr|Q9VT21|Q9VT21_DROME	CG8336, isoform A OS=Drosophila melanogaster GN=CG8336 PE=2 SV=1	0.94	0.94	1.06	0.96	1	1.08	1.02	3	3	43	3.5	0.199669	0.975	1.03333	1.05983	0.699689
815.1	sp|Q9VMA7|TGO1_DROME	Transport and Golgi organization protein 1 OS=Drosophila melanogaster GN=Tango1 PE=1 SV=2	0.99	0.88	1.02	1.01	1.04	1.05	1.01	35	17	159	11	0.199669	0.975	1.03333	1.05983	0.699689
908.1	tr|Q9V428|Q9V428_DROME	Icarus OS=Drosophila melanogaster GN=ics PE=2 SV=2	0.97	0.87	1.08	0.94	1.09	0.99	1.07	32	7	32	50.3	0.200462	0.965	1.05	1.08808	0.697969
3265.1	tr|Q8IPP4|Q8IPP4_DROME	Canoe, isoform C OS=Drosophila melanogaster GN=cno PE=2 SV=1	1.07	0.94	1.1	1.02	1.03	0.89	0.94	4	4	209	1	0.200609	1.0325	0.953333	0.923325	0.69765
4169.1	tr|Q9VZR5|Q9VZR5_DROME	CG14968, isoform A OS=Drosophila melanogaster GN=CG14968 PE=2 SV=1	0.73	1.06	1.06	0.88	1.04	1.02	1.21	2	2	22	4.5	0.200894	0.9325	1.09	1.1689	0.697033
2640.1	tr|Q9VYY7|Q9VYY7_DROME	Heterochromatin protein 5, isoform B OS=Drosophila melanogaster GN=HP5 PE=1 SV=1	0.95	0.91	1.09	0.9	1.05	0.99	1.11	7	4	93	3.8	0.200925	0.9625	1.05	1.09091	0.696966
3301.1	tr|Q9V9N5|Q9V9N5_DROME	CG15216 OS=Drosophila melanogaster GN=CG15216 PE=2 SV=1	1.03	0.87	1.02	0.92	1.06	1.14	0.96	4	3	49	4.1	0.201037	0.96	1.05333	1.09722	0.696723
5640.1	sp|P37159|LYSE_DROME	Lysozyme E OS=Drosophila melanogaster GN=LysE PE=2 SV=2	1.16	0.93	0.65	0.61	1.56	1.34	0.74	1	1	16	3.2	0.201331	0.8375	1.21333	1.44876	0.69609
193.1	sp|P54399|PDI_DROME	Protein disulfide-isomerase OS=Drosophila melanogaster GN=Pdi PE=2 SV=1	1.01	0.92	1.02	0.94	1.02	1.11	0.98	144	26	56	129.2	0.201628	0.9725	1.03667	1.06598	0.695448
2676.1	tr|Q9W0Q2|Q9W0Q2_DROME	Peptidyl-prolyl cis-trans isomerase OS=Drosophila melanogaster GN=Cypl PE=2 SV=1	0.94	0.91	1.04	1	1.04	1.09	0.98	7	3	20	17.9	0.201628	0.9725	1.03667	1.06598	0.695448
3948.1	sp|Q9VXE0|RUXG_DROME	Probable small nuclear ribonucleoprotein G OS=Drosophila melanogaster GN=SmG PE=1 SV=1	0.8	0.74	1.08	1.04	1.35	0.98	1.03	3	1	9	17.6	0.202202	0.915	1.12	1.22404	0.694214
316.1	sp|P36179|2AAA_DROME	Serine/threonine-protein phosphatase PP2A 65 kDa regulatory subunit OS=Drosophila melanogaster GN=Pp2A-29B PE=1 SV=4	0.97	0.95	0.98	0.99	1.06	1.1	0.94	90	16	65	68.8	0.202323	0.9725	1.03333	1.06255	0.693955
5224.1	sp|Q9V9V9|NAT9_DROME	N-acetyltransferase 9-like protein OS=Drosophila melanogaster GN=CG11539 PE=1 SV=1	0.83	0.87	0.94	0.87	0.84	1.04	1.61	1	1	24	2.1	0.202374	0.8775	1.16333	1.32574	0.693845
241.1	tr|Q9VKX2|Q9VKX2_DROME	Malate dehydrogenase OS=Drosophila melanogaster GN=Mdh1 PE=1 SV=2	1.01	0.91	1.05	0.93	1.03	1.02	1.05	111	11	36	154	0.202488	0.975	1.03333	1.05983	0.693601
4839.1	tr|Q9V9R3|Q9V9R3_DROME	Ac3, isoform A OS=Drosophila melanogaster GN=Ac3 PE=2 SV=1	0.96	0.82	1.17	0.67	1.17	0.94	1.26	1	1	130	0.4	0.202599	0.905	1.12333	1.24125	0.693362
1184.1	tr|Q9W4X4|Q9W4X4_DROME	CG10260 OS=Drosophila melanogaster GN=CG10260 PE=2 SV=2	0.98	0.89	1.08	0.92	1.07	1.05	1.01	23	15	244	4.7	0.202604	0.9675	1.04333	1.07838	0.693352
428.1	tr|Q9VJG0|Q9VJG0_DROME	Aminopeptidase P OS=Drosophila melanogaster GN=ApepP PE=2 SV=1	0.99	0.87	1.06	0.96	1.07	1.06	1	70	12	68	51.1	0.202717	0.97	1.04333	1.0756	0.693111
3325.1	tr|Q9VFM0|Q9VFM0_DROME	CG9649 OS=Drosophila melanogaster GN=CG9649 PE=2 SV=1	0.91	1.04	0.97	0.96	0.96	1.12	1.05	4	3	57	3.5	0.202717	0.97	1.04333	1.0756	0.693111
613.1	sp|Q23983|SNAP_DROME	Soluble NSF attachment protein OS=Drosophila melanogaster GN=Snap PE=1 SV=1	0.97	1	0.96	1.01	1.02	1.06	0.98	48	10	33	72.8	0.203111	0.985	1.02	1.03553	0.692267
143.1	tr|Q8T4G5|Q8T4G5_DROME	CG6512, isoform A OS=Drosophila melanogaster GN=CG6512 PE=2 SV=1	1.01	0.93	1.04	0.94	1.04	1	1.05	192	26	90	107.1	0.203111	0.98	1.03	1.05102	0.692267
3369.1	tr|A1Z909|A1Z909_DROME	CG8545 OS=Drosophila melanogaster GN=CG8545-RA PE=2 SV=1	0.96	0.86	1.03	1.03	1.03	1.04	1.05	4	3	100	2	0.203111	0.97	1.04	1.07216	0.692267
4131.1	tr|Q9VBC7|Q9VBC7_DROME	Amontillado OS=Drosophila melanogaster GN=amon PE=2 SV=1	0.87	1.01	1.02	0.98	0.98	1.07	1.07	2	2	72	1.4	0.203111	0.97	1.04	1.07216	0.692267
4630.1	tr|Q9VG74|Q9VG74_DROME	Neu5Ac synthase OS=Drosophila melanogaster GN=Sas PE=2 SV=2	0.99	0.87	1.04	0.98	1.09	1.03	1	1	1	41	1.2	0.203111	0.97	1.04	1.07216	0.692267
2985.1	sp|O46084|PGAM5_DROME	Serine/threonine-protein phosphatase Pgam5, mitochondrial OS=Drosophila melanogaster GN=Pgam5 PE=1 SV=1	0.99	0.96	1	1.01	1.02	1.01	1	5	4	33	7.5	0.203111	0.99	1.01	1.0202	0.692267
26.2	sp|A1ZA47-2|ZASP_DROME	Isoform A of PDZ and LIM domain protein Zasp OS=Drosophila melanogaster GN=Zasp52	0.98	0.97	1	1.01	1.02	1.02	0.99	200	14	129	77.5	0.203111	0.99	1.01	1.0202	0.692267
2993.1	tr|Q9VZL5|Q9VZL5_DROME	CG14980 OS=Drosophila melanogaster GN=CG14980 PE=2 SV=3	1.03	0.9	1.01	0.94	1.03	1.11	0.98	5	4	55	4.5	0.203111	0.97	1.04	1.07216	0.692267
197.1	tr|Q9VKW5|Q9VKW5_DROME	CG5355 OS=Drosophila melanogaster GN=CG5355 PE=2 SV=2	0.98	0.94	1.02	1	1	1.05	1.01	136	28	86	78.8	0.203111	0.985	1.02	1.03553	0.692267
2061.1	tr|Q0KHQ1|Q0KHQ1_DROME	CG33714, isoform A OS=Drosophila melanogaster GN=CG33714 PE=2 SV=1	0.98	1.08	0.99	1.1	0.98	1.03	0.84	11	3	10	54.9	0.203422	1.0375	0.95	0.915663	0.691603
4158.1	tr|Q9VW57|Q9VW57_DROME	Grasp65 OS=Drosophila melanogaster GN=Grasp65 PE=1 SV=1	1.03	0.83	0.97	0.84	0.94	1	1.39	2	2	48	2.1	0.203432	0.9175	1.11	1.20981	0.691581
182.1	sp|O77460|IPYR_DROME	Inorganic pyrophosphatase OS=Drosophila melanogaster GN=Nurf-38 PE=1 SV=3	1.02	0.9	1.03	0.96	1.04	1.03	1.02	152	13	38	200.4	0.203974	0.9775	1.03	1.05371	0.690425
4566.1	sp|Q8MLL3-2|COQ10_DROME	Isoform A of Coenzyme Q-binding protein COQ10, mitochondrial OS=Drosophila melanogaster GN=Coq10	0.92	0.92	0.99	1	0.91	1.14	1.11	2	1	24	4.2	0.204175	0.9575	1.05333	1.10009	0.689997
4912.1	tr|Q9VHV3|Q9VHV3_DROME	CG7800 OS=Drosophila melanogaster GN=CG7800-RA PE=2 SV=2	1.06	0.76	0.97	0.95	1.13	1.21	0.92	1	1	60	0.8	0.204259	0.935	1.08667	1.16221	0.689818
2280.1	sp|Q7K4W1|CDKAL_DROME	CDKAL1-like protein OS=Drosophila melanogaster GN=CG6550 PE=2 SV=1	1.04	0.9	1.04	0.86	1.11	1.04	1	9	5	63	7.2	0.204285	0.96	1.05	1.09375	0.689763
1260.1	tr|Q7JW03|Q7JW03_DROME	Ubiquitin carrier protein OS=Drosophila melanogaster GN=Ubc-E2H PE=2 SV=1	0.94	0.87	1.02	1.02	0.97	1.13	1.04	22	2	21	52.7	0.20449	0.9625	1.04667	1.08745	0.689327
1266.1	sp|Q9VCX4|RRF2M_DROME	Ribosome-releasing factor 2, mitochondrial OS=Drosophila melanogaster GN=CG31159 PE=2 SV=3	1.03	0.85	1.06	0.91	1.07	1.06	1.02	21	12	82	12.8	0.204663	0.9625	1.05	1.09091	0.688961
5752.1	tr|Q9VA93|Q9VA93_DROME	CG15531, isoform A OS=Drosophila melanogaster GN=CG15531 PE=1 SV=1	1.13	1.05	1	0.97	0.86	0.95	1.04	1	1	38	1.3	0.204663	1.0375	0.95	0.915663	0.688961
5484.1	sp|Q9W3Y0|ZN593_DROME	Zinc finger protein 593 homolog OS=Drosophila melanogaster GN=CG3224 PE=1 SV=1	0.57	1.19	0.58	1.12	1.05	1.36	1.12	1	1	19	2.6	0.204687	0.865	1.17667	1.36031	0.688909
4830.1	sp|Q9W1K0|U136_DROME	UPF0136 membrane protein CG5532 OS=Drosophila melanogaster GN=CG5532 PE=3 SV=1	0.93	0.91	1.1	0.84	1.16	0.94	1.11	1	1	12	4.3	0.204935	0.945	1.07	1.13228	0.688384
3605.1	tr|Q9V3H6|Q9V3H6_DROME	CG7968 OS=Drosophila melanogaster GN=CG7968 PE=2 SV=1	0.91	0.76	1.14	0.84	0.88	1.19	1.28	3	3	28	5.3	0.204941	0.9125	1.11667	1.22374	0.688372
4585.1	tr|Q8I0I5|Q8I0I5_DROME	Pop2, isoform B OS=Drosophila melanogaster GN=Pop2 PE=2 SV=1	1.05	0.95	1.01	1.11	1.01	0.97	0.9	2	1	33	3	0.20505	1.03	0.96	0.932039	0.688141
760.1	tr|Q9VIU8|Q9VIU8_DROME	CG10132 OS=Drosophila melanogaster GN=CG10132 PE=2 SV=2	0.93	0.96	1.07	0.94	1.01	1.03	1.06	38	20	152	12.5	0.205282	0.975	1.03333	1.05983	0.68765
422.1	tr|Q9W2M4|Q9W2M4_DROME	CG10527 OS=Drosophila melanogaster GN=CG10527 PE=1 SV=1	1	0.88	1.06	0.93	1.03	1.01	1.08	71	9	32	112.6	0.205369	0.9675	1.04	1.07494	0.687465
3823.1	tr|Q9VIW9|Q9VIW9_DROME	CG16771 OS=Drosophila melanogaster GN=CG16771 PE=2 SV=1	0.86	0.86	1.04	1.02	1.22	0.98	1.01	3	2	65	2.3	0.205541	0.945	1.07	1.13228	0.687102
1708.1	sp|Q9V8M2|C12B2_DROME	Probable cytochrome P450 12b2, mitochondrial OS=Drosophila melanogaster GN=Cyp12b2 PE=2 SV=2	1.03	0.85	1.04	0.93	1.1	1.03	1.01	14	7	61	11.4	0.205827	0.9625	1.04667	1.08745	0.686498
2082.1	tr|A1Z7C4|A1Z7C4_DROME	CG33087 OS=Drosophila melanogaster GN=LRP1 PE=4 SV=1	0.95	0.93	1.04	0.97	1.11	1.03	0.97	10	8	525	0.9	0.206246	0.9725	1.03667	1.06598	0.685615
1913.1	tr|Q9W369|Q9W369_DROME	Mutant tan OS=Drosophila melanogaster GN=t PE=2 SV=1	0.94	0.91	1.08	0.95	1.1	1.01	1.02	12	5	44	13.7	0.206246	0.97	1.04333	1.0756	0.685615
1022.1	tr|Q7K2X5|Q7K2X5_DROME	CG14762 OS=Drosophila melanogaster GN=CG14762 PE=2 SV=1	1.02	0.93	1.02	0.93	0.99	1.02	1.08	28	10	53	26.6	0.206246	0.975	1.03	1.05641	0.685615
1527.1	tr|Q9VBI3|Q9VBI3_DROME	CG14542 OS=Drosophila melanogaster GN=vps2 PE=2 SV=1	0.75	1	0.96	1.02	0.92	1.1	1.25	17	5	27	31.1	0.206264	0.9325	1.09	1.1689	0.685576
2230.1	tr|Q9VHA8|Q9VHA8_DROME	LD25575p OS=Drosophila melanogaster GN=P58IPK PE=2 SV=1	0.92	0.89	1.11	0.92	1.11	1.02	1.03	9	6	57	7.9	0.206496	0.96	1.05333	1.09722	0.685088
2978.1	tr|Q9XZ28|Q9XZ28_DROME	CG7115, isoform A OS=Drosophila melanogaster GN=CG7115 PE=2 SV=1	0.85	0.87	1.13	0.92	1.06	0.98	1.18	5	4	58	4.3	0.206633	0.9425	1.07333	1.13882	0.684801
3171.1	tr|Q9VXK5|Q9VXK5_DROME	CG8939 OS=Drosophila melanogaster GN=CG8939 PE=2 SV=1	1.01	0.87	1.09	0.84	1.12	1.1	0.98	5	2	93	2.7	0.206766	0.9525	1.06667	1.11986	0.684522
3233.1	sp|Q9VM65|CCA_DROME	Circulating cathodic antigen homolog OS=Drosophila melanogaster GN=CG10158 PE=1 SV=1	0.98	0.92	1.02	1	1.06	1.01	1	4	4	35	5.7	0.207034	0.98	1.02333	1.04422	0.683959
302.1	tr|Q500Y7|Q500Y7_DROME	CG14482 OS=Drosophila melanogaster GN=CG14482 PE=2 SV=1	0.93	0.96	1.07	0.95	1.05	1.01	1.04	94	3	6	749.3	0.207245	0.9775	1.03333	1.05712	0.683517
3506.1	tr|Q9VFR4|Q9VFR4_DROME	CG9312 OS=Drosophila melanogaster GN=CG9312 PE=2 SV=1	1.05	1	1.01	1.05	1.06	0.92	0.92	4	1	23	8.6	0.207444	1.0275	0.966667	0.940795	0.683098
4069.1	tr|Q7KTA2|Q7KTA2_DROME	CG33306 OS=Drosophila melanogaster GN=CG33306 PE=2 SV=1	0.87	0.82	1.17	0.84	0.98	1.28	1.05	2	2	27	3.7	0.208099	0.925	1.10333	1.19279	0.681731
299.1	sp|Q11002|CANA_DROME	Calpain-A OS=Drosophila melanogaster GN=CalpA PE=1 SV=2	1.01	0.93	1.04	0.91	1.08	1.05	0.98	94	23	94	50	0.208529	0.9725	1.03667	1.06598	0.680834
1302.1	tr|Q9W370|Q9W370_DROME	CG15369 OS=Drosophila melanogaster GN=CG15369 PE=2 SV=1	0.97	1.07	1.05	1.19	1	1.05	0.68	21	4	13	79.8	0.208646	1.07	0.91	0.850467	0.68059
1245.1	tr|Q9VA97|Q9VA97_DROME	CG1983 OS=Drosophila melanogaster GN=CG1983 PE=2 SV=2	0.99	0.86	1.09	0.9	1.07	1	1.09	22	7	28	38.9	0.208653	0.96	1.05333	1.09722	0.680575
5573.1	sp|Q0KIA2|Y9801_DROME	PP2C-like domain-containing protein CG9801 OS=Drosophila melanogaster GN=CG9801 PE=1 SV=1	1.02	0.82	0.94	1.02	1.16	1.11	0.93	1	1	77	0.7	0.208739	0.95	1.06667	1.12281	0.680396
3099.1	sp|P43332|SNRPA_DROME	U1 small nuclear ribonucleoprotein A OS=Drosophila melanogaster GN=snf PE=1 SV=1	0.9	0.98	0.98	1.02	1.13	0.98	1.01	5	3	25	10.2	0.208892	0.97	1.04	1.07216	0.680078
4557.1	tr|Q7KT84|Q7KT84_DROME	CG18636 OS=Drosophila melanogaster GN=CG18636 PE=3 SV=2	1.05	0.84	0.85	0.94	1.23	1.26	0.83	2	1	40	2.5	0.20919	0.92	1.10667	1.2029	0.679458
5704.1	sp|A0A1F4-2|EYS_DROME	Isoform B of Protein eyes shut OS=Drosophila melanogaster GN=eys	0.96	0.96	0.97	0.87	1.22	0.86	1.16	1	1	233	0.2	0.209369	0.94	1.08	1.14894	0.679087
2162.1	sp|O96539-2|ATE1_DROME	Isoform A of Arginyl-tRNA--protein transferase 1 OS=Drosophila melanogaster GN=Ate1	0.89	1	0.98	1.02	1	1.08	1.01	10	5	55	9.2	0.20953	0.9725	1.03	1.05913	0.678753
3944.1	sp|Q8INF2|MMP37_DROME	MMP37-like protein, mitochondrial OS=Drosophila melanogaster GN=CG3641 PE=2 SV=1	0.88	1.1	1.1	1.08	0.97	0.97	0.89	3	1	38	3.9	0.209616	1.04	0.943333	0.907051	0.678577
1343.1	sp|Q9VHN6|RM19_DROME	39S ribosomal protein L19, mitochondrial OS=Drosophila melanogaster GN=mRpL19 PE=2 SV=1	0.98	1.08	1.01	1.1	1.02	1.01	0.79	20	8	36	27.6	0.209619	1.0425	0.94	0.901679	0.678569
4966.1	tr|A1Z6G9|A1Z6G9_DROME	CG8245 OS=Drosophila melanogaster GN=CG8245 PE=4 SV=1	1.09	1.02	1.07	0.94	1.03	0.94	0.9	1	1	39	1.3	0.209735	1.03	0.956667	0.928803	0.678329
2821.1	sp|Q9W0G1|PTP61_DROME	Tyrosine-protein phosphatase non-receptor type 61F OS=Drosophila melanogaster GN=Ptp61F PE=1 SV=1	0.97	1	0.95	0.98	1.04	1.12	0.95	6	4	62	4.8	0.209996	0.975	1.03667	1.06325	0.677789
3772.1	sp|Q24337|ER_DROME	Protein enhancer of rudimentary OS=Drosophila melanogaster GN=e(r) PE=1 SV=1	0.84	0.88	1.1	1	1.13	1.04	1.02	3	2	12	12.3	0.210424	0.955	1.06333	1.11344	0.676906
1861.1	tr|Q8SY52|Q8SY52_DROME	Elastin-like, isoform A OS=Drosophila melanogaster GN=Ela PE=2 SV=1	1.17	0.88	0.85	0.82	1.24	1.02	1.02	13	1	33	19.6	0.210447	0.93	1.09333	1.17563	0.676857
4157.1	sp|Q9VC61-2|U474_DROME	Isoform 2 of UPF0474 protein CG13624 OS=Drosophila melanogaster GN=CG13624	1.07	1.01	0.91	0.84	1.11	0.97	1.1	2	2	89	1.1	0.210507	0.9575	1.06	1.10705	0.676734
1168.2	tr|A1Z729|A1Z729_DROME	CG2064 OS=Drosophila melanogaster GN=CG2064 PE=3 SV=1	1.04	0.92	1.01	0.95	1.05	1.04	1	21	8	37	28.7	0.210644	0.98	1.03	1.05102	0.676451
4985.1	tr|Q9VYF0|Q9VYF0_DROME	CG1764 OS=Drosophila melanogaster GN=CG1764 PE=2 SV=1	1.04	0.93	1.02	0.93	1.04	1.02	1.03	1	1	30	1.7	0.210644	0.98	1.03	1.05102	0.676451
2161.1	tr|Q8IRC2|Q8IRC2_DROME	CG14995, isoform D OS=Drosophila melanogaster GN=CG14995 PE=2 SV=1	1.02	0.88	1.04	0.95	1.04	1.06	1.01	10	5	41	12.3	0.210796	0.9725	1.03667	1.06598	0.676138
39.1	tr|Q9VM14|Q9VM14_DROME	AT21758p OS=Drosophila melanogaster GN=CG5261 PE=2 SV=1	1	0.94	1.03	0.97	1.03	1.03	1	775	21	54	714.7	0.210796	0.985	1.02	1.03553	0.676138
1279.1	sp|Q9NBK5-2|TRC_DROME	Isoform A of Serine/threonine-protein kinase tricorner OS=Drosophila melanogaster GN=trc	0.98	0.92	1.04	0.97	1.07	0.98	1.04	21	9	53	19.9	0.210796	0.9775	1.03	1.05371	0.676138
671.1	sp|Q9XZU1|XPO2_DROME	Exportin-2 OS=Drosophila melanogaster GN=Cas PE=1 SV=2	1	0.89	1.06	0.94	1.06	1.03	1.02	43	22	110	19.5	0.210796	0.9725	1.03667	1.06598	0.676138
3088.1	tr|Q8SZ16|Q8SZ16_DROME	CG14898 OS=Drosophila melanogaster GN=CG14898 PE=2 SV=1	0.95	0.99	1.02	0.96	1.09	0.99	1	5	3	14	18	0.210796	0.98	1.02667	1.04762	0.676138
5301.1	tr|Q9VYA8|Q9VYA8_DROME	LD02616p OS=Drosophila melanogaster GN=Tango2 PE=2 SV=2	1.04	1.11	0.98	0.99	1.04	0.91	0.93	1	1	31	1.6	0.210796	1.03	0.96	0.932039	0.676138
1235.1	tr|Q7KTU2|Q7KTU2_DROME	Secretory pathway calcium atpase, isoform B OS=Drosophila melanogaster GN=SPoCk PE=2 SV=1	1.02	0.93	1.03	0.94	1.02	1.01	1.05	22	10	114	9.7	0.210796	0.98	1.02667	1.04762	0.676138
1094.1	tr|Q9VPF3|Q9VPF3_DROME	CG11796, isoform A OS=Drosophila melanogaster GN=CG11796 PE=2 SV=1	1.05	0.85	1.1	0.75	1.03	1.06	1.17	26	9	43	30	0.211017	0.9375	1.08667	1.15911	0.675682
1832.1	tr|A1Z6X6|A1Z6X6_DROME	CG1707 OS=Drosophila melanogaster GN=CG1707 PE=4 SV=1	1.07	0.85	0.98	0.91	1.2	0.98	1.02	13	4	20	32.4	0.211072	0.9525	1.06667	1.11986	0.675569
86.1	tr|Q95TZ7|Q95TZ7_DROME	GH19182p OS=Drosophila melanogaster GN=Zasp66 PE=2 SV=1	0.97	0.87	1.09	0.91	1.1	0.99	1.06	345	22	44	388.1	0.211241	0.96	1.05	1.09375	0.675223
2943.1	tr|Q7KSA4|Q7KSA4_DROME	CG5191, isoform C OS=Drosophila melanogaster GN=CG5191 PE=2 SV=1	1.11	0.91	0.93	0.87	1.02	1.15	1.01	6	1	59	5.1	0.211638	0.955	1.06	1.10995	0.674406
5145.1	sp|Q9V3A4|CSUP_DROME	Protein catecholamines up OS=Drosophila melanogaster GN=Catsup PE=1 SV=1	0.78	0.92	1.11	0.94	1.04	0.98	1.23	1	1	49	1	0.211669	0.9375	1.08333	1.15556	0.674343
1307.1	tr|Q9W1H6|Q9W1H6_DROME	CG5597 OS=Drosophila melanogaster GN=CG5597 PE=2 SV=1	0.9	0.92	1.03	0.92	1.01	0.94	1.29	21	3	30	35.4	0.211688	0.9425	1.08	1.14589	0.674304
2238.1	tr|Q7K209|Q7K209_DROME	CG8525 OS=Drosophila melanogaster GN=CG8525 PE=2 SV=1	0.98	0.88	1.1	0.89	1.09	1.01	1.06	9	6	38	11.7	0.211875	0.9625	1.05333	1.09437	0.67392
948.1	sp|Q9VVY3|Y9619_DROME	CBM21 domain-containing protein CG9619 OS=Drosophila melanogaster GN=CG9619 PE=1 SV=1	0.97	0.9	1.07	0.95	1.07	0.99	1.06	30	13	74	20.3	0.211877	0.9725	1.04	1.06941	0.673916
3249.1	sp|Q9GQN5|ATRX_DROME	Transcriptional regulator ATRX homolog OS=Drosophila melanogaster GN=XNP PE=1 SV=2	1.06	0.83	1.03	0.9	1.13	1.09	0.97	4	4	148	1.4	0.212006	0.955	1.06333	1.11344	0.673651
1992.1	tr|Q9VPY9|Q9VPY9_DROME	CG5001 OS=Drosophila melanogaster GN=CG5001-RA PE=2 SV=3	0.84	0.89	1.04	1.02	1.22	0.98	1.01	11	7	40	13.9	0.212033	0.9475	1.07	1.12929	0.673597
4166.1	tr|Q9VT05|Q9VT05_DROME	CG3408 OS=Drosophila melanogaster GN=CG3408 PE=2 SV=1	0.97	0.84	1	1.02	1.03	1.16	0.97	2	2	37	2.7	0.212342	0.9575	1.05333	1.10009	0.672965
2243.1	tr|Q9VL10|Q9VL10_DROME	AT10584p OS=Drosophila melanogaster GN=CG18162 PE=2 SV=2	1.08	0.98	1.07	1.05	0.99	1.05	0.78	9	6	46	9.8	0.212478	1.045	0.94	0.899522	0.672686
1371.1	tr|Q9VCH5|Q9VCH5_DROME	Nup98 OS=Drosophila melanogaster GN=Nup98 PE=1 SV=3	1.07	0.88	0.98	0.94	1.11	1.04	0.99	19	13	210	4.5	0.212637	0.9675	1.04667	1.08183	0.67236
1809.1	tr|Q9VBL3|Q9VBL3_DROME	CG5886 OS=Drosophila melanogaster GN=CG5886 PE=2 SV=1	0.97	1.1	1.02	1.08	1.01	1.02	0.8	13	6	59	11	0.212681	1.0425	0.943333	0.904876	0.672271
1349.1	sp|P07192|MAL3_DROME	Probable maltase L OS=Drosophila melanogaster GN=LvpL PE=2 SV=2	0.95	0.74	1.13	0.9	0.95	1.21	1.12	20	7	65	15.3	0.21288	0.93	1.09333	1.17563	0.671865
542.1	tr|Q9VVH3|Q9VVH3_DROME	CG7603 OS=Drosophila melanogaster GN=CG7603 PE=2 SV=1	0.99	0.89	1.06	0.95	1.05	1	1.06	55	5	14	200.1	0.213046	0.9725	1.03667	1.06598	0.671526
1536.1	sp|Q9V4N3-2|CYB5_DROME	Isoform A of Cytochrome b5 OS=Drosophila melanogaster GN=Cyt-b5	0.98	1.02	0.94	0.95	1.12	1.07	0.94	17	3	14	61.2	0.213132	0.9725	1.04333	1.07284	0.671351
4383.1	sp|Q9VBX2|MOC2B_DROME	Molybdopterin synthase catalytic subunit OS=Drosophila melanogaster GN=Mocs2 PE=1 SV=2	1	0.91	1.02	0.95	1.02	0.97	1.14	2	1	42	2.4	0.213186	0.97	1.04333	1.0756	0.671241
631.1	tr|E1JHE4|E1JHE4_DROME	Fatty acid (Long chain) transport protein, isoform C OS=Drosophila melanogaster GN=Fatp PE=4 SV=1	1.01	0.91	1.03	0.95	1.02	0.99	1.09	46	20	79	29	0.213517	0.975	1.03333	1.05983	0.670568
430.1	sp|Q8IN44|TOTA_DROME	Protein Turandot A OS=Drosophila melanogaster GN=TotA PE=1 SV=1	0.95	0.95	0.99	0.87	1.12	1.24	0.87	70	7	14	246.3	0.213537	0.94	1.07667	1.14539	0.670527
958.2	sp|P33270|CP6A2_DROME	Cytochrome P450 6a2 OS=Drosophila melanogaster GN=Cyp6a2 PE=2 SV=2	1.08	0.92	0.97	0.89	1.11	1.04	0.99	22	11	59	18.8	0.213572	0.965	1.04667	1.08463	0.670456
4971.1	sp|P13368|7LESS_DROME	Protein sevenless OS=Drosophila melanogaster GN=sev PE=1 SV=2	1.12	0.86	0.93	0.92	1.09	1.01	1.07	1	1	287	0.2	0.21362	0.9575	1.05667	1.10357	0.670359
4088.1	sp|Q9VZ08|RME6_DROME	Receptor-mediated endocytosis protein 6 homolog OS=Drosophila melanogaster GN=CG1657 PE=1 SV=2	0.99	0.87	1	0.99	1.15	0.96	1.03	2	2	191	0.5	0.213729	0.9625	1.04667	1.08745	0.670137
4147.1	sp|Q9V3J8|WDS_DROME	Protein will die slowly OS=Drosophila melanogaster GN=wds PE=2 SV=1	0.94	0.98	0.89	1.06	1	1.01	1.12	2	2	39	2.6	0.214013	0.9675	1.04333	1.07838	0.66956
4949.1	tr|Q9VW21|Q9VW21_DROME	CG9376 OS=Drosophila melanogaster GN=CG9376 PE=2 SV=2	0.94	0.85	1.14	0.78	1.21	0.92	1.16	1	1	26	1.9	0.214028	0.9275	1.09667	1.18239	0.669529
4054.1	tr|Q7JQN4|Q7JQN4_DROME	LD15481p OS=Drosophila melanogaster GN=Rs1 PE=2 SV=1	1.02	0.81	1.08	0.91	1.08	1.04	1.05	2	2	88	1.1	0.214083	0.955	1.05667	1.10646	0.669417
3821.1	tr|Q7K1C2|Q7K1C2_DROME	CG1942 OS=Drosophila melanogaster GN=CG1942 PE=2 SV=1	0.94	1.02	0.86	1	1.02	1.2	0.96	3	2	40	3.8	0.214151	0.955	1.06	1.10995	0.669279
610.1	sp|Q9VL18|EF1D_DROME	Probable elongation factor 1-delta OS=Drosophila melanogaster GN=eEF1delta PE=1 SV=1	0.98	0.96	1.02	0.99	1.03	1.05	0.98	48	13	29	83	0.214191	0.9875	1.02	1.03291	0.669199
4602.1	tr|Q9I7T8|Q9I7T8_DROME	CG11486, isoform A OS=Drosophila melanogaster GN=CG11486-RB PE=2 SV=1	0.92	0.88	1.13	0.87	1.16	1.02	1.02	2	1	80	1.2	0.214193	0.95	1.06667	1.12281	0.669195
5438.1	tr|Q9VBS5|Q9VBS5_DROME	CG10559 OS=Drosophila melanogaster GN=CG10559 PE=1 SV=2	1.21	0.85	0.8	0.85	1.04	1.19	1.06	1	1	48	1	0.21435	0.9275	1.09667	1.18239	0.668877
2939.1	tr|Q9VV87|Q9VV87_DROME	Baldspot, isoform A OS=Drosophila melanogaster GN=Baldspot PE=2 SV=2	1	0.89	1.03	0.89	1.12	1.16	0.91	6	1	37	8.2	0.214558	0.9525	1.06333	1.11636	0.668456
3754.1	tr|Q9VHI1|Q9VHI1_DROME	Hyrax OS=Drosophila melanogaster GN=hyx PE=2 SV=1	1.06	0.92	0.99	0.91	1.05	1.09	0.98	3	2	61	2.5	0.214568	0.97	1.04	1.07216	0.668435
5497.1	tr|Q9VBP3|Q9VBP3_DROME	FI03751p OS=Drosophila melanogaster GN=tankyrase PE=2 SV=1	0.93	0.72	0.89	1.01	0.89	1.56	1.01	1	1	128	0.4	0.214676	0.8875	1.15333	1.29953	0.668216
4392.1	tr|Q961Q9|Q961Q9_DROME	CG5687 OS=Drosophila melanogaster GN=CG5687 PE=2 SV=1	0.95	0.72	1.16	0.82	1.27	0.91	1.17	2	1	74	1.4	0.215006	0.9125	1.11667	1.22374	0.66755
7.1	tr|A1ZA66|A1ZA66_DROME	Stretchin-Mlck, isoform A OS=Drosophila melanogaster GN=Strn-Mlck PE=4 SV=1	0.99	0.92	1.04	0.97	1.06	1.02	1	2504	213	1036	120.8	0.215037	0.98	1.02667	1.04762	0.667488
3433.1	tr|Q7KTX7|Q7KTX7_DROME	FI05213p OS=Drosophila melanogaster GN=park PE=2 SV=1	1.04	0.95	1	0.93	1.02	1.06	1	4	2	54	3.7	0.215037	0.98	1.02667	1.04762	0.667488
1632.1	tr|Q9VXQ0|Q9VXQ0_DROME	Mitochondrial ribosomal protein L3 OS=Drosophila melanogaster GN=mRpL3 PE=1 SV=2	1.01	1	1.08	1.09	1.05	0.99	0.77	15	6	41	18.5	0.215147	1.045	0.936667	0.896332	0.667264
1771.1	tr|E1JJ30|E1JJ30_DROME	RhoGAP100F, isoform D OS=Drosophila melanogaster GN=RhoGAP100F PE=4 SV=1	1.03	0.84	1	0.94	1.19	1.06	0.94	13	10	198	3.3	0.215305	0.9525	1.06333	1.11636	0.666946
4283.1	tr|Q9VFB3|Q9VFB3_DROME	Arginine methyltransferase 3, isoform A OS=Drosophila melanogaster GN=Art3 PE=2 SV=1	1.01	0.97	0.99	0.89	1.01	1.15	0.97	2	2	59	1.7	0.215461	0.965	1.04333	1.08117	0.66663
5200.1	tr|Q9VA23|Q9VA23_DROME	CG15548 OS=Drosophila melanogaster GN=CG15548 PE=2 SV=2	1.13	1.03	0.93	1.04	1.01	0.94	0.92	1	1	95	0.5	0.215609	1.0325	0.956667	0.926554	0.666333
3791.1	tr|Q9W464|Q9W464_DROME	CG3033 OS=Drosophila melanogaster GN=CG3033 PE=2 SV=1	1.09	0.79	1.05	0.8	1.24	1.05	0.99	3	2	75	2	0.215875	0.9325	1.09333	1.17248	0.665798
1410.1	tr|A1Z6N5|A1Z6N5_DROME	CG3270 OS=Drosophila melanogaster GN=CG3270-RA PE=2 SV=1	0.92	0.93	1.07	0.97	1.07	0.98	1.07	19	6	48	20	0.215918	0.9725	1.04	1.06941	0.665711
360.1	sp|Q7KW39-2|MMSA_DROME	Isoform A of Probable methylmalonate-semialdehyde dehydrogenase [acylating], mitochondrial OS=Drosophila melanogaster GN=CG17896	1	0.91	1.07	0.91	1.07	1.02	1.03	82	13	55	74.5	0.215918	0.9725	1.04	1.06941	0.665711
753.1	tr|Q7KJ69|Q7KJ69_DROME	IP02725p OS=Drosophila melanogaster GN=skpB PE=2 SV=1	1.02	0.89	1.05	0.93	1.05	1	1.07	39	8	18	106	0.215918	0.9725	1.04	1.06941	0.665711
5110.1	tr|A1Z7K2|A1Z7K2_DROME	CG30349 OS=Drosophila melanogaster GN=CG30349-RA PE=2 SV=1	0.83	0.9	0.81	0.95	0.87	1.66	0.98	1	1	68	0.7	0.216108	0.8725	1.17	1.34097	0.665329
1000.1	tr|Q9VXI3|Q9VXI3_DROME	CG9911, isoform C OS=Drosophila melanogaster GN=CG9911 PE=2 SV=1	0.99	0.93	1.05	0.94	1.06	0.98	1.06	29	8	43	33.5	0.216167	0.9775	1.03333	1.05712	0.665211
460.1	tr|Q9V9W4|Q9V9W4_DROME	CG1774 OS=Drosophila melanogaster GN=CG1774 PE=2 SV=1	1	0.91	1.04	0.96	1.08	1.03	0.99	65	10	54	60.2	0.216167	0.9775	1.03333	1.05712	0.665211
2874.1	tr|Q9Y124|Q9Y124_DROME	BcDNA.GH08385 OS=Drosophila melanogaster GN=BcDNA.GH08385 PE=2 SV=1	0.99	0.92	1.06	0.93	1.01	1.02	1.07	6	3	51	5.9	0.216214	0.975	1.03333	1.05983	0.665117
5009.1	tr|Q9VPP7|Q9VPP7_DROME	AT13539p OS=Drosophila melanogaster GN=CG11885 PE=2 SV=1	0.97	0.92	1.06	0.91	1.05	1.13	0.96	1	1	16	3.1	0.216323	0.965	1.04667	1.08463	0.664897
5064.1	tr|Q9VAF4|Q9VAF4_DROME	Dim gamma-tubulin 1 OS=Drosophila melanogaster GN=dgt1 PE=2 SV=2	0.99	0.97	0.96	0.79	1.34	1.04	0.91	1	1	56	0.9	0.216909	0.9275	1.09667	1.18239	0.663723
5278.1	tr|Q9VEB2|Q9VEB2_DROME	CG7168 OS=Drosophila melanogaster GN=CG7168 PE=2 SV=1	0.83	0.74	1.11	0.97	1.33	0.91	1.09	1	1	26	1.9	0.217028	0.9125	1.11	1.21644	0.663484
4561.1	tr|Q8INZ6|Q8INZ6_DROME	CG31805 OS=Drosophila melanogaster GN=CG31805 PE=2 SV=2	0.74	0.85	0.99	1.04	0.82	1.38	1.19	2	1	69	1.4	0.21728	0.905	1.13	1.24862	0.662981
2044.1	sp|P48593|E631_DROME	Calcium-binding protein E63-1 OS=Drosophila melanogaster GN=Eip63F-1 PE=1 SV=2	1.04	0.9	0.98	0.97	1.07	1.06	0.97	11	4	22	25	0.217442	0.9725	1.03333	1.06255	0.662658
2773.1	tr|Q95NU8|Q95NU8_DROME	GH16255p OS=Drosophila melanogaster GN=jeb PE=2 SV=1	0.98	0.8	1.11	0.89	1.16	1.09	0.97	6	4	61	4.9	0.217498	0.945	1.07333	1.1358	0.662545
3695.1	tr|E1JHP3|E1JHP3_DROME	CG31619, isoform D OS=Drosophila melanogaster GN=CG31619 PE=4 SV=1	0.8	1.01	1.01	1.02	1.12	1.03	1.02	3	3	154	1	0.217505	0.96	1.05667	1.10069	0.66253
2655.1	sp|Q7JXV9|VPS25_DROME	Vacuolar protein-sorting-associated protein 25 OS=Drosophila melanogaster GN=Vps25 PE=1 SV=1	1.02	0.86	1.03	0.94	1.13	1.03	0.98	7	3	21	17	0.217605	0.9625	1.04667	1.08745	0.662331
1703.1	tr|Q9Y166|Q9Y166_DROME	BcDNA.GH02431 OS=Drosophila melanogaster GN=BcDNA.GH02431 PE=2 SV=1	1.04	0.93	1.02	0.88	1.02	1	1.1	14	7	31	22.8	0.217722	0.9675	1.04	1.07494	0.662098
1990.1	tr|Q9VJ58|Q9VJ58_DROME	Fas-associated factor OS=Drosophila melanogaster GN=Faf PE=2 SV=1	1.01	0.98	0.95	0.99	1.06	1.03	0.97	11	7	53	10.4	0.217998	0.9825	1.02	1.03817	0.661547
827.1	tr|Q9VCE0|Q9VCE0_DROME	CG5991, isoform A OS=Drosophila melanogaster GN=CG5991 PE=2 SV=1	1	0.94	1	1	1.06	0.99	1.01	35	9	50	34.7	0.218295	0.985	1.02	1.03553	0.660957
5228.1	tr|Q9W423|Q9W423_DROME	LD18904p OS=Drosophila melanogaster GN=schlank PE=2 SV=2	1.1	0.94	1.06	1.09	1.09	0.87	0.86	1	1	46	1.1	0.218595	1.0475	0.94	0.897375	0.66036
1066.1	tr|Q9VHZ5|Q9VHZ5_DROME	CG31472, isoform A OS=Drosophila melanogaster GN=CG2649 PE=2 SV=3	1	0.87	1.04	0.97	1.05	0.99	1.07	27	8	28	48.4	0.218679	0.97	1.03667	1.06873	0.660193
1938.1	tr|Q9VA81|Q9VA81_DROME	IP02765p OS=Drosophila melanogaster GN=mRpS18C PE=2 SV=2	0.97	1.07	1.02	1.13	0.98	1.05	0.78	12	4	16	37.1	0.219012	1.0475	0.936667	0.894193	0.659532
3108.1	tr|Q9VUF9|Q9VUF9_DROME	CG9628, isoform B OS=Drosophila melanogaster GN=CG9628 PE=2 SV=2	0.94	0.82	1.19	0.74	1.24	1.09	0.99	5	3	20	12.7	0.219093	0.9225	1.10667	1.19964	0.659372
4098.1	tr|Q9VZ66|Q9VZ66_DROME	CG15209 OS=Drosophila melanogaster GN=CG15209 PE=2 SV=1	1	0.77	1.08	0.93	1	1.04	1.17	2	2	17	6	0.219159	0.945	1.07	1.13228	0.659241
171.1	sp|Q9V9E3|PREP_DROME	Presequence protease, mitochondrial OS=Drosophila melanogaster GN=CG3107 PE=1 SV=2	1	0.93	1.04	0.95	1.05	0.99	1.04	161	29	119	67.5	0.219219	0.98	1.02667	1.04762	0.659121
5658.1	tr|A1Z758|A1Z758_DROME	CG18853 OS=Drosophila melanogaster GN=CG18853 PE=2 SV=1	0.95	0.75	1.08	0.99	1.18	0.98	1.07	1	1	38	1.3	0.219455	0.9425	1.07667	1.14235	0.658655
5685.1	sp|Q9V7S5-2|PICO_DROME	Isoform A of Putative inorganic phosphate cotransporter OS=Drosophila melanogaster GN=Picot	0.94	0.99	1.06	0.81	1.16	0.94	1.1	1	1	56	0.9	0.219551	0.95	1.06667	1.12281	0.658464
1985.1	tr|Q86BS5|Q86BS5_DROME	Huntingtin interacting protein 1, isoform B OS=Drosophila melanogaster GN=Hip1 PE=2 SV=1	0.94	0.97	1.04	0.94	1.04	1.11	0.96	11	8	124	4.4	0.2197	0.9725	1.03667	1.06598	0.658171
2665.1	tr|Q9W298|Q9W298_DROME	CG2921 OS=Drosophila melanogaster GN=CG2921 PE=2 SV=1	1.1	0.78	1.1	0.73	1.15	1.08	1.06	7	3	55	6.3	0.219762	0.9275	1.09667	1.18239	0.658047
4293.1	tr|A4V441|A4V441_DROME	Singed, isoform B OS=Drosophila melanogaster GN=sn PE=4 SV=1	0.89	0.95	1.04	1.01	1.06	1.05	0.99	2	2	57	1.8	0.219891	0.9725	1.03333	1.06255	0.657793
11.3	tr|Q8T4D6|Q8T4D6_DROME	AT02886p OS=Drosophila melanogaster GN=CG4706 PE=2 SV=1	0.91	0.87	1.04	1.04	1.09	1.01	1.03	106	9	85	62.4	0.219907	0.965	1.04333	1.08117	0.657761
3806.1	tr|Q9VGH0|Q9VGH0_DROME	CG6962 OS=Drosophila melanogaster GN=CG6962 PE=2 SV=1	1.05	0.85	1.04	0.88	1.16	1.02	1	3	2	87	1.7	0.219936	0.955	1.06	1.10995	0.657703
3819.1	tr|A1Z6H0|A1Z6H0_DROME	CG1298 OS=Drosophila melanogaster GN=kune PE=4 SV=1	1.03	0.87	1	0.84	1.26	0.88	1.12	3	2	30	5	0.219956	0.935	1.08667	1.16221	0.657664
2396.1	tr|A1Z850|A1Z850_DROME	Superoxide dismutase [Cu-Zn] OS=Drosophila melanogaster GN=CCS PE=3 SV=1	0.94	0.82	1.11	0.96	1.06	1.04	1.07	8	5	28	14.3	0.220109	0.9575	1.05667	1.10357	0.657362
4464.1	sp|Q9VGN9|RLP24_DROME	Probable ribosome biogenesis protein RLP24 OS=Drosophila melanogaster GN=RpL24-like PE=1 SV=1	0.89	0.85	1.09	0.97	0.94	1.1	1.16	2	1	22	4.5	0.220215	0.95	1.06667	1.12281	0.657154
3453.1	tr|Q7JXF7|Q7JXF7_DROME	CG12918 OS=Drosophila melanogaster GN=CG12918 PE=2 SV=1	0.9	0.89	1.11	0.91	1.18	1.01	1	4	2	21	9.4	0.220482	0.9525	1.06333	1.11636	0.656626
5168.1	tr|Q9VJ04|Q9VJ04_DROME	CG10702, isoform A OS=Drosophila melanogaster GN=CG10702 PE=2 SV=1	0.75	0.82	0.93	1.07	0.85	1.51	1.08	1	1	109	0.5	0.220705	0.8925	1.14667	1.28478	0.656189
3131.1	tr|Q9W152|Q9W152_DROME	CG11413 OS=Drosophila melanogaster GN=CG11413 PE=2 SV=1	0.96	1.08	0.93	1.23	0.97	0.96	0.86	5	2	15	16.7	0.221111	1.05	0.93	0.885714	0.65539
5283.1	tr|Q9VWJ7|Q9VWJ7_DROME	Heparan sulfate 3-O sulfotransferase-B OS=Drosophila melanogaster GN=Hs3st-B PE=2 SV=1	1.02	0.82	0.98	0.84	0.99	1.42	0.93	1	1	43	1.1	0.221254	0.915	1.11333	1.21676	0.65511
4109.1	sp|P81829|LCK_DROME	Leucokinin OS=Drosophila melanogaster GN=Lk PE=1 SV=3	0.93	0.94	1.05	0.94	1.15	0.98	1	2	2	18	5.5	0.221374	0.965	1.04333	1.08117	0.654873
1697.1	tr|Q9VRV8|Q9VRV8_DROME	Transportin, isoform A OS=Drosophila melanogaster GN=Trn PE=2 SV=1	0.95	0.9	1.06	0.99	1.03	1.01	1.06	14	8	101	6.9	0.221537	0.975	1.03333	1.05983	0.654554
2652.1	tr|Q0E8K8|Q0E8K8_DROME	Vitamin D[[3]] up-regulated protein 1, isoform A OS=Drosophila melanogaster GN=Vdup1 PE=2 SV=1	1.01	0.96	1.01	0.97	1.05	1	1	7	3	39	9	0.221537	0.9875	1.01667	1.02954	0.654554
1631.1	tr|Q9VDE2|Q9VDE2_DROME	CG5793 OS=Drosophila melanogaster GN=CG5793 PE=1 SV=2	1.01	0.89	1.06	0.92	1.05	0.99	1.09	15	6	25	30.5	0.221647	0.97	1.04333	1.0756	0.654338
1382.1	tr|Q9VRV1|Q9VRV1_DROME	CG10289 OS=Drosophila melanogaster GN=CG10289 PE=2 SV=2	1.04	0.93	0.99	0.96	1.04	1.04	0.99	19	10	111	8.6	0.221716	0.98	1.02333	1.04422	0.654203
1706.1	tr|Q86PD3|Q86PD3_DROME	CG30022 OS=Drosophila melanogaster GN=CG30022;CG30023 PE=2 SV=1	0.96	0.89	1.09	0.91	1.03	0.99	1.14	14	7	31	22.3	0.22182	0.9625	1.05333	1.09437	0.654
5496.1	tr|A1ZA98|A1ZA98_DROME	Juvenile hormone esterase, isoform A OS=Drosophila melanogaster GN=Jhe PE=4 SV=2	0.98	0.89	1.01	0.85	1.24	1.2	0.84	1	1	64	0.8	0.221827	0.9325	1.09333	1.17248	0.653985
2711.2	tr|B7Z0Q3|B7Z0Q3_DROME	CG11857, isoform B OS=Drosophila melanogaster GN=CG11857 PE=4 SV=1	1.01	0.85	1.01	0.95	1.19	0.96	1.02	4	2	28	7.3	0.221991	0.955	1.05667	1.10646	0.653665
2623.1	tr|Q7KN61|Q7KN61_DROME	Farnesyl pyrophosphate synthase OS=Drosophila melanogaster GN=Fpps PE=2 SV=1	1.02	1.01	1.05	1.06	0.9	1.09	0.86	7	4	48	7.3	0.222292	1.035	0.95	0.917874	0.653075
3843.1	sp|Q9W0P3|MED30_DROME	Mediator of RNA polymerase II transcription subunit 30 OS=Drosophila melanogaster GN=MED30 PE=1 SV=1	0.95	0.86	1.13	0.87	1.01	1.05	1.13	3	2	35	4.2	0.222675	0.9525	1.06333	1.11636	0.652329
2351.1	tr|Q9V3N4|Q9V3N4_DROME	Huntingtin OS=Drosophila melanogaster GN=htt PE=2 SV=1	1	0.86	1.07	0.92	1.06	1.11	0.98	8	7	396	1	0.222707	0.9625	1.05	1.09091	0.652266
3128.1	tr|Q9VHW5|Q9VHW5_DROME	CG11035 OS=Drosophila melanogaster GN=CG11035 PE=2 SV=1	1.01	0.88	1.04	0.94	1.09	0.97	1.06	5	2	27	9.2	0.222867	0.9675	1.04	1.07494	0.651955
2300.1	tr|A1Z9J6|A1Z9J6_DROME	Mitochondrial ribosomal protein L53 OS=Drosophila melanogaster GN=mRpL53 PE=2 SV=1	0.98	1.05	1.12	1.06	1.06	0.99	0.74	9	4	17	26.7	0.222945	1.0525	0.93	0.88361	0.651802
1391.1	sp|P25455|PIP1_DROME	1-phosphatidylinositol-4,5-bisphosphate phosphodiesterase classes I and II OS=Drosophila melanogaster GN=Plc21C PE=2 SV=3	0.98	0.89	1.08	0.91	1.1	0.98	1.06	19	9	146	6.5	0.223094	0.965	1.04667	1.08463	0.651512
3017.1	sp|Q9V558|CP4P1_DROME	Cytochrome P450 4p1 OS=Drosophila melanogaster GN=Cyp4p1 PE=1 SV=1	1.02	0.89	1.02	0.94	1.08	1.1	0.95	5	4	59	4.2	0.223466	0.9675	1.04333	1.07838	0.650788
2760.1	sp|Q9V6H1|CP9H1_DROME	Probable cytochrome P450 9h1 OS=Drosophila melanogaster GN=Cyp9h1 PE=3 SV=1	1.01	0.84	1.05	0.92	1.01	0.99	1.17	6	5	60	5	0.22372	0.955	1.05667	1.10646	0.650295
432.1	sp|P23226-3|MA205_DROME	Isoform B3 of 205 kDa microtubule-associated protein OS=Drosophila melanogaster GN=Map205	1.03	0.94	1.03	0.91	1.03	1.05	1.01	69	21	124	27.8	0.224002	0.9775	1.03	1.05371	0.649748
819.1	tr|Q9V9N7|Q9V9N7_DROME	CG6448, isoform A OS=Drosophila melanogaster GN=CG42748 PE=2 SV=2	1.03	0.91	1.03	0.92	1.09	1.03	0.99	35	14	189	9.3	0.224055	0.9725	1.03667	1.06598	0.649645
1171.1	tr|Q9VH64|Q9VH64_DROME	CG8507 OS=Drosophila melanogaster GN=CG8507 PE=2 SV=1	1.03	0.89	1.04	0.93	1.07	1.03	1.01	24	7	45	26.9	0.224055	0.9725	1.03667	1.06598	0.649645
93.1	sp|Q9VU68-2|WDR1_DROME	Isoform B of Actin-interacting protein 1 OS=Drosophila melanogaster GN=flr	1	0.93	1.04	0.97	1.02	1.02	1.03	314	21	66	237.6	0.224682	0.985	1.02333	1.03892	0.648432
324.1	tr|Q9W3X7|Q9W3X7_DROME	CG3192, isoform A OS=Drosophila melanogaster GN=CG3192-RA PE=2 SV=1	0.95	0.96	1.02	1.01	1.05	1.04	0.98	89	7	20	220.4	0.224682	0.985	1.02333	1.03892	0.648432
2753.1	tr|Q961N0|Q961N0_DROME	Alpha-Esterase-2 OS=Drosophila melanogaster GN=alpha-Est2 PE=2 SV=1	1.09	0.98	1.01	1.01	0.96	1.03	0.91	6	5	65	4.6	0.224835	1.0225	0.966667	0.945395	0.648135
3222.1	tr|Q86BM0|Q86BM0_DROME	CG9515 OS=Drosophila melanogaster GN=CG9515 PE=2 SV=1	0.87	0.93	1.1	0.91	1.1	0.94	1.15	4	4	23	8.7	0.224851	0.9525	1.06333	1.11636	0.648106
1355.1	tr|Q0E8U4|Q0E8U4_DROME	CG17224, isoform A OS=Drosophila melanogaster GN=CG17224-RB PE=2 SV=1	0.95	0.89	1.08	0.95	0.98	1.06	1.09	20	6	33	30	0.225013	0.9675	1.04333	1.07838	0.647792
4899.1	tr|Q9VK99|Q9VK99_DROME	CG6579 OS=Drosophila melanogaster GN=atilla PE=4 SV=3	0.85	0.82	1.01	0.98	1.41	0.96	0.95	1	1	15	3.2	0.225165	0.915	1.10667	1.20947	0.647499
2871.1	sp|Q27589|CP4D2_DROME	Cytochrome P450 4d2 OS=Drosophila melanogaster GN=Cyp4d2 PE=2 SV=2	1.01	0.96	1.04	0.91	1.06	1.02	1.01	6	3	58	5.2	0.225179	0.98	1.03	1.05102	0.647473
590.1	tr|Q9W3F6|Q9W3F6_DROME	CG1440, isoform A OS=Drosophila melanogaster GN=CG1440 PE=2 SV=2	0.98	0.96	1.04	0.94	1.05	0.97	1.07	50	9	55	45.4	0.225179	0.98	1.03	1.05102	0.647473
3866.1	tr|Q9VYL1|Q9VYL1_DROME	CG2543 OS=Drosophila melanogaster GN=CG2543 PE=2 SV=2	1.06	0.86	0.93	0.99	1.08	0.95	1.13	3	2	64	2.3	0.225387	0.96	1.05333	1.09722	0.647072
4115.1	tr|Q9W2F3|Q9W2F3_DROME	Protein tyrosine phosphatase ERK OS=Drosophila melanogaster GN=PTP-ER PE=2 SV=2	0.97	0.75	1.04	0.99	0.96	1.04	1.24	2	2	153	0.7	0.225403	0.9375	1.08	1.152	0.64704
3896.1	tr|Q8IPF2|Q8IPF2_DROME	Hepatocyte nuclear factor 4, isoform B OS=Drosophila melanogaster GN=Hnf4 PE=2 SV=1	0.92	1.08	0.91	0.97	1.02	1.01	1.09	3	2	79	1.9	0.225613	0.97	1.04	1.07216	0.646637
4712.1	tr|Q9W025|Q9W025_DROME	Dromyosuppressin receptor 1 OS=Drosophila melanogaster GN=DmsR-1 PE=2 SV=2	0.98	0.89	1.08	0.79	1.23	1.13	0.9	1	1	53	0.9	0.225784	0.935	1.08667	1.16221	0.646308
3359.1	tr|Q9VPB2|Q9VPB2_DROME	Spc105-related OS=Drosophila melanogaster GN=Spc105R PE=1 SV=2	0.98	0.87	0.99	0.96	1.1	1.22	0.89	4	3	223	0.9	0.226064	0.95	1.07	1.12632	0.645769
5219.1	sp|Q9VA27|CP4C3_DROME	Cytochrome P450 4c3 OS=Drosophila melanogaster GN=Cyp4c3 PE=2 SV=1	0.73	0.95	0.91	1.09	0.96	1.01	1.34	1	1	61	0.8	0.226086	0.92	1.10333	1.19928	0.645726
3070.1	tr|Q9VVY7|Q9VVY7_DROME	CG32206 OS=Drosophila melanogaster GN=CG32206 PE=1 SV=3	1.08	0.84	0.97	0.85	1.26	1.1	0.9	5	3	138	1.8	0.226168	0.935	1.08667	1.16221	0.645569
1811.1	tr|Q7K1U0|Q7K1U0_DROME	Arc1 OS=Drosophila melanogaster GN=Arc1 PE=2 SV=1	1.05	0.89	1.05	0.76	0.94	1.1	1.21	13	6	29	22.5	0.226559	0.9375	1.08333	1.15556	0.644818
3492.1	tr|B7Z0Q8|B7Z0Q8_DROME	Lysosomal enzyme receptor protein, isoform D OS=Drosophila melanogaster GN=Lerp PE=4 SV=1	1.05	0.83	1	0.91	0.92	1.16	1.11	4	2	100	2	0.226602	0.9475	1.06333	1.12225	0.644736
2805.1	tr|Q9W136|Q9W136_DROME	CG42361 OS=Drosophila melanogaster GN=CG42361 PE=2 SV=3	0.9	0.85	1.14	0.93	1.06	1.11	1.02	6	4	24	12.4	0.226644	0.955	1.06333	1.11344	0.644655
2656.1	tr|A1Z7B8|A1Z7B8_DROME	CG30373 OS=Drosophila melanogaster GN=CG30373 PE=4 SV=1	1.04	1	1.07	0.99	1.05	0.95	0.89	7	3	18	19.6	0.226693	1.025	0.963333	0.939837	0.644562
1101.1	tr|Q8SXF2|Q8SXF2_DROME	CG5612 OS=Drosophila melanogaster GN=CG5612 PE=2 SV=1	1.02	0.87	1.02	0.99	1.04	1.03	1.03	26	7	48	26.9	0.226767	0.975	1.03333	1.05983	0.64442
5478.1	tr|Q9VXU3|Q9VXU3_DROME	CG6340, isoform B OS=Drosophila melanogaster GN=CG6340 PE=2 SV=1	1.15	1.04	1.12	0.88	1.02	0.92	0.87	1	1	57	0.9	0.227011	1.0475	0.936667	0.894193	0.643953
4385.1	tr|Q7K2B1|Q7K2B1_DROME	CG7222 OS=Drosophila melanogaster GN=CG7222 PE=2 SV=1	0.92	0.97	1.01	0.97	1.16	1.04	0.94	2	1	23	4.3	0.22704	0.9675	1.04667	1.08183	0.643898
4332.1	tr|Q9VG05|Q9VG05_DROME	CG7518, isoform E OS=Drosophila melanogaster GN=CG7518 PE=4 SV=3	0.82	1.14	0.84	0.9	0.88	1.23	1.19	2	2	267	0.4	0.227055	0.925	1.1	1.18919	0.643869
997.1	sp|Q27606|CP4E2_DROME	Cytochrome P450 4e2 OS=Drosophila melanogaster GN=Cyp4e2 PE=1 SV=2	1	0.94	1.04	0.95	1.01	1.01	1.05	29	9	61	23.9	0.227084	0.9825	1.02333	1.04156	0.643813
673.1	sp|P45437|COPB_DROME	Coatomer subunit beta OS=Drosophila melanogaster GN=betaCop PE=1 SV=2	1	0.91	1.02	0.98	1.07	1.05	0.97	43	15	107	20	0.227215	0.9775	1.03	1.05371	0.643564
4881.1	tr|Q7K0A2|Q7K0A2_DROME	Cuticular protein 47Eb OS=Drosophila melanogaster GN=Cpr47Eb PE=2 SV=1	0.71	0.98	1.04	1.01	1.06	0.97	1.23	1	1	23	2.2	0.227319	0.935	1.08667	1.16221	0.643365
5488.1	sp|P81160|DEJP_DROME	Ductus ejaculatorius peptide 99B OS=Drosophila melanogaster GN=Dup99B PE=1 SV=2	0.69	0.68	0.95	1.27	1.03	1.14	1.23	1	1	6	8	0.227383	0.8975	1.13333	1.26277	0.643241
1667.1	tr|A1ZBU8|A1ZBU8_DROME	CG18067 OS=Drosophila melanogaster GN=CG18067 PE=4 SV=1	1.03	0.92	1.06	0.83	1.05	1	1.11	15	3	26	28.6	0.227414	0.96	1.05333	1.09722	0.643182
2095.1	sp|Q9VU87|VPS36_DROME	Vacuolar protein-sorting-associated protein 36 OS=Drosophila melanogaster GN=Vps36 PE=2 SV=2	0.94	0.88	1.11	0.92	1.05	1.07	1.02	10	7	44	11.3	0.227704	0.9625	1.04667	1.08745	0.642629
3747.1	tr|Q9VFW3|Q9VFW3_DROME	Chemosensory protein A 87a OS=Drosophila melanogaster GN=CheA87a PE=1 SV=1	1.06	0.92	1.01	0.86	1.12	1.01	1.01	3	2	21	7	0.227704	0.9625	1.04667	1.08745	0.642629
5428.1	sp|P17789|TTKB_DROME	Protein tramtrack, beta isoform OS=Drosophila melanogaster GN=ttk PE=1 SV=2	1.04	1.07	0.96	0.56	1.26	1.17	0.95	1	1	69	0.7	0.228071	0.9075	1.12667	1.24151	0.641929
4475.1	tr|A8DYG7|A8DYG7_DROME	CG34459 OS=Drosophila melanogaster GN=CG34459 PE=4 SV=1	0.94	0.92	1.09	0.81	1.22	1.11	0.91	2	1	33	3	0.228311	0.94	1.08	1.14894	0.641473
479.2	tr|E2QCN9|E2QCN9_DROME	GS1-like, isoform B OS=Drosophila melanogaster GN=Gs1l PE=4 SV=1	0.8	0.98	1	1.01	0.99	0.99	1.22	59	4	26	115.2	0.228663	0.9475	1.06667	1.12577	0.640804
468.1	tr|Q9W1F7|Q9W1F7_DROME	CG2970 OS=Drosophila melanogaster GN=CG2970 PE=2 SV=2	0.98	0.89	1.05	0.96	1.1	1.03	0.98	64	12	41	79	0.228705	0.97	1.03667	1.06873	0.640725
398.1	tr|Q9VZG2|Q9VZG2_DROME	Cuticular protein 64Aa OS=Drosophila melanogaster GN=Cpr64Aa PE=2 SV=1	1.01	1.04	0.97	1.16	1.03	0.99	0.8	74	8	20	188.7	0.228808	1.045	0.94	0.899522	0.640529
681.1	tr|Q9VB46|Q9VB46_DROME	Hemomucin OS=Drosophila melanogaster GN=Hmu PE=2 SV=1	1.04	0.91	0.99	0.91	1.16	1.01	0.97	43	8	63	33.9	0.228943	0.9625	1.04667	1.08745	0.640273
1892.1	sp|Q9VW43|CP305_DROME	Probable cytochrome P450 305a1 OS=Drosophila melanogaster GN=Cyp305a1 PE=2 SV=1	0.97	0.91	1.03	0.99	1.11	1.03	0.97	12	6	58	10.4	0.229004	0.975	1.03667	1.06325	0.640157
2541.1	sp|P48608|DIA_DROME	Protein diaphanous OS=Drosophila melanogaster GN=dia PE=1 SV=2	0.9	0.89	1.09	0.99	1.05	1.03	1.05	7	6	123	2.8	0.229606	0.9675	1.04333	1.07838	0.639017
1906.1	tr|Q9VI81|Q9VI81_DROME	CG14607 OS=Drosophila melanogaster GN=CG14607 PE=2 SV=1	0.95	0.94	1.04	0.92	1.16	1.06	0.93	12	5	40	14.9	0.229633	0.9625	1.05	1.09091	0.638965
3858.1	sp|Q9VFR0|BCCIP_DROME	Protein BCCIP homolog OS=Drosophila melanogaster GN=CG9286 PE=1 SV=2	0.86	0.98	1.09	0.92	1.06	1.1	0.99	3	2	33	4.5	0.229633	0.9625	1.05	1.09091	0.638965
1457.1	tr|Q9VPJ9|Q9VPJ9_DROME	CG3164, isoform B OS=Drosophila melanogaster GN=CG3164 PE=2 SV=2	0.96	0.87	1.09	0.94	1.06	0.99	1.09	18	6	78	11.5	0.229715	0.965	1.04667	1.08463	0.638811
105.1	tr|Q9W3X6|Q9W3X6_DROME	FI05334p OS=Drosophila melanogaster GN=l(1)G0255 PE=2 SV=3	1	0.92	1.02	0.99	1.05	1.05	0.98	273	17	54	254.9	0.229747	0.9825	1.02667	1.04495	0.63875
5722.1	tr|A1Z791|A1Z791_DROME	CG12769, isoform A OS=Drosophila melanogaster GN=CG12769-RA PE=2 SV=1	1.12	0.79	0.91	0.93	1.01	1.25	0.99	1	1	75	0.7	0.230271	0.9375	1.08333	1.15556	0.63776
82.3	sp|P06606|TBA4_DROME	Tubulin alpha-4 chain OS=Drosophila melanogaster GN=alphaTub67C PE=1 SV=1	0.9	0.77	1.12	0.88	1.26	0.85	1.21	9	2	51	8.8	0.230373	0.9175	1.10667	1.20618	0.637568
4942.1	sp|Q9VG76|MYCBP_DROME	C-Myc-binding protein homolog OS=Drosophila melanogaster GN=CG17202 PE=2 SV=2	0.91	1.01	0.95	1.04	0.99	1.05	1.05	1	1	20	2.5	0.230393	0.9775	1.03	1.05371	0.637531
3154.1	tr|Q9VP18|Q9VP18_DROME	FI02825p OS=Drosophila melanogaster GN=VhaM9.7-b PE=2 SV=2	0.81	1.03	1.01	0.99	1.03	1	1.13	5	2	10	24.9	0.23043	0.96	1.05333	1.09722	0.637461
5353.1	sp|Q9W5U2|CHIT3_DROME	Probable chitinase 3 OS=Drosophila melanogaster GN=Cht3 PE=2 SV=2	1.07	0.87	0.98	0.92	1.16	1.02	0.98	1	1	259	0.2	0.23043	0.96	1.05333	1.09722	0.637461
1546.1	tr|Q9VWC8|Q9VWC8_DROME	CG12703 OS=Drosophila melanogaster GN=CG12703 PE=2 SV=2	0.91	1.05	0.92	1.01	1.07	1.06	0.98	16	9	75	10.6	0.230471	0.9725	1.03667	1.06598	0.637383
4984.1	tr|Q9W396|Q9W396_DROME	FI06908p OS=Drosophila melanogaster GN=HP1b PE=2 SV=1	0.79	1.02	1	0.97	1.09	1.21	0.92	1	1	26	1.9	0.230471	0.945	1.07333	1.1358	0.637383
865.1	sp|P34082|FAS2_DROME	Fasciclin-2 OS=Drosophila melanogaster GN=Fas2 PE=1 SV=1	0.98	0.98	1.02	0.96	1.08	0.99	1	33	14	97	17	0.230666	0.985	1.02333	1.03892	0.637016
2062.1	tr|Q9VZ24|Q9VZ24_DROME	CG15201 OS=Drosophila melanogaster GN=CG15201 PE=2 SV=1	0.94	0.98	1	1.02	0.98	1.06	1.03	11	3	13	43.8	0.230666	0.985	1.02333	1.03892	0.637016
2260.1	sp|P54352-3|EAS_DROME	Isoform D of Ethanolamine kinase OS=Drosophila melanogaster GN=eas	0.9	0.93	1.08	0.97	1.03	1.01	1.07	9	6	55	8.2	0.23067	0.97	1.03667	1.06873	0.637009
4119.1	tr|Q9XZ16|Q9XZ16_DROME	CG6697 OS=Drosophila melanogaster GN=CG6697 PE=2 SV=1	1.12	0.77	0.99	0.91	1.14	1.01	1.07	2	2	37	2.7	0.230741	0.9475	1.07333	1.13281	0.636875
2100.1	sp|Q8IRG6-2|SPT16_DROME	Isoform A of FACT complex subunit spt16 OS=Drosophila melanogaster GN=dre4	0.97	0.94	0.99	0.95	1.05	1.18	0.92	10	7	128	3.9	0.230772	0.9625	1.05	1.09091	0.636817
1273.2	tr|A1Z7F2|A1Z7F2_DROME	CG11669 OS=Drosophila melanogaster GN=Mal-A7 PE=4 SV=1	1.06	0.89	1.03	0.87	1.08	1.09	0.98	13	6	67	9.7	0.230772	0.9625	1.05	1.09091	0.636817
1965.1	sp|Q9VKJ3|NU160_DROME	Nuclear pore complex protein Nup160 homolog OS=Drosophila melanogaster GN=Nup160 PE=1 SV=1	1.01	0.88	1.06	0.93	1.08	1	1.04	11	9	160	3.4	0.230985	0.97	1.04	1.07216	0.636417
4898.1	tr|Q9VEW1|Q9VEW1_DROME	CG14880, isoform A OS=Drosophila melanogaster GN=CG14880 PE=2 SV=2	1.04	0.88	0.93	0.91	1.23	1.15	0.86	1	1	70	0.7	0.230985	0.94	1.08	1.14894	0.636417
1454.1	tr|A1ZB71|A1ZB71_DROME	Glutathione S transferase E6 OS=Drosophila melanogaster GN=GstE6 PE=3 SV=1	1.03	0.94	1.05	0.85	1.04	1.02	1.07	18	6	25	36	0.231121	0.9675	1.04333	1.07838	0.63616
4489.1	sp|Q24325|TAF2_DROME	Transcription initiation factor TFIID subunit 2 OS=Drosophila melanogaster GN=Taf2 PE=1 SV=2	0.88	0.92	0.96	0.96	1.3	1.14	0.83	2	1	139	0.7	0.231878	0.93	1.09	1.17204	0.634741
1088.1	tr|Q9VP57|Q9VP57_DROME	LD15904p OS=Drosophila melanogaster GN=pzg PE=2 SV=1	1	0.89	1.05	0.96	1.07	1.02	1.01	26	11	105	12.4	0.231906	0.975	1.03333	1.05983	0.634688
159.1	tr|Q8IQG9|Q8IQG9_DROME	Adenylate kinase-1, isoform B OS=Drosophila melanogaster GN=Adk1 PE=2 SV=1	0.98	0.99	1.02	0.96	1.03	0.98	1.04	169	7	25	334.5	0.231906	0.9875	1.01667	1.02954	0.634688
930.1	tr|Q9VV72|Q9VV72_DROME	Multiple inositol polyphosphate phosphatase 1, isoform A OS=Drosophila melanogaster GN=Mipp1 PE=2 SV=2	1.04	0.88	1.05	0.89	1.12	1	1.03	31	8	54	28.9	0.232045	0.965	1.05	1.08808	0.634428
2668.1	tr|Q9VA09|Q9VA09_DROME	Guanylyl cyclase beta-subunit at 100B OS=Drosophila melanogaster GN=Gycbeta100B PE=1 SV=1	0.95	0.96	0.91	0.99	1.11	1.21	0.88	7	3	87	4	0.232401	0.9525	1.06667	1.11986	0.633762
5692.1	tr|Q9VR40|Q9VR40_DROME	CG31660, isoform B OS=Drosophila melanogaster GN=pog PE=2 SV=3	0.95	0.93	1.01	0.91	1.25	1	0.94	1	1	87	0.6	0.23242	0.95	1.06333	1.1193	0.633727
1097.1	tr|Q95RE4|Q95RE4_DROME	LD37574p OS=Drosophila melanogaster GN=yps PE=2 SV=1	0.89	0.91	1.03	1.04	1.07	1.09	0.97	26	8	38	34.1	0.232629	0.9675	1.04333	1.07838	0.633337
411.1	tr|E2QD73|E2QD73_DROME	Dunce, isoform J OS=Drosophila melanogaster GN=dnc PE=4 SV=1	0.98	0.84	1.09	0.91	1.11	0.96	1.1	72	24	115	31.3	0.233055	0.955	1.05667	1.10646	0.632541
701.1	tr|Q9VSR5|Q9VSR5_DROME	GM03767p OS=Drosophila melanogaster GN=mRpL12 PE=2 SV=1	0.98	1.06	1.03	1.12	1.02	1.03	0.75	42	7	20	106.9	0.233064	1.0475	0.933333	0.89101	0.632525
1613.1	tr|Q8IMK1|Q8IMK1_DROME	CG34133, isoform C OS=Drosophila melanogaster GN=CG7814 PE=2 SV=3	1.01	0.91	1.04	0.94	1.03	1.07	0.99	15	8	121	6.2	0.233104	0.975	1.03	1.05641	0.632451
3909.1	sp|Q9W1A4|TAMO_DROME	Protein tamozhennic OS=Drosophila melanogaster GN=tamo PE=1 SV=1	0.98	1.04	1.15	0.95	0.94	0.94	0.99	3	2	88	1.7	0.233104	1.03	0.956667	0.928803	0.632451
1185.1	tr|Q9W1X5|Q9W1X5_DROME	GH04942p OS=Drosophila melanogaster GN=nahoda PE=2 SV=2	0.95	0.93	1.07	0.95	1.06	1	1.03	23	15	150	7.7	0.233104	0.975	1.03	1.05641	0.632451
5220.1	tr|A1ZB47|A1ZB47_DROME	CG33958, isoform A OS=Drosophila melanogaster GN=CG33958-RA PE=2 SV=1	0.76	1.04	1	0.94	0.92	1.07	1.27	1	1	80	0.6	0.233754	0.935	1.08667	1.16221	0.631241
1315.4	tr|Q8MT77|Q8MT77_DROME	CG31793 OS=Drosophila melanogaster GN=CG17338 PE=2 SV=1	1.05	0.9	1.02	0.9	1.09	1.07	0.97	8	7	146	2.7	0.234128	0.9675	1.04333	1.07838	0.630546
2500.1	tr|O97102|O97102_DROME	LD07775p OS=Drosophila melanogaster GN=smt3 PE=1 SV=1	0.99	0.96	0.98	0.98	1	1.11	0.97	8	3	10	39.5	0.234421	0.9775	1.02667	1.0503	0.630003
4090.1	sp|Q9VR91|HERC2_DROME	Probable E3 ubiquitin-protein ligase HERC2 OS=Drosophila melanogaster GN=HERC2 PE=1 SV=3	0.91	0.91	1.08	0.93	1.09	1.15	0.93	2	2	530	0.2	0.234433	0.9575	1.05667	1.10357	0.62998
5723.1	sp|P06601-2|PRD_DROME	Isoform A of Segmentation protein paired OS=Drosophila melanogaster GN=prd	0.91	0.97	1.03	0.97	0.94	1.11	1.07	1	1	63	0.8	0.234512	0.97	1.04	1.07216	0.629834
3346.1	tr|Q0E8S5|Q0E8S5_DROME	CG13784, isoform C OS=Drosophila melanogaster GN=CG13784 PE=4 SV=2	0.88	0.95	1	1.04	0.98	1.02	1.12	4	3	32	6.2	0.234535	0.9675	1.04	1.07494	0.629792
1025.2	tr|Q24113|Q24113_DROME	NonA-like OS=Drosophila melanogaster GN=nonA-l PE=1 SV=2	0.9	0.96	0.98	1.01	1.03	1.17	0.94	6	3	70	4.3	0.235058	0.9625	1.04667	1.08745	0.628825
5344.1	tr|Q9V4D8|Q9V4D8_DROME	FI14922p OS=Drosophila melanogaster GN=Thd1 PE=2 SV=1	0.83	0.78	1.15	0.83	1.47	0.88	1.06	1	1	191	0.3	0.235299	0.8975	1.13667	1.26648	0.628381
334.1	tr|Q8IP76|Q8IP76_DROME	CG6043, isoform D OS=Drosophila melanogaster GN=CG6043 PE=2 SV=1	0.98	0.93	1.04	0.97	1.03	1.07	0.98	87	20	101	43.2	0.235387	0.98	1.02667	1.04762	0.628217
1165.1	tr|Q9VTV9|Q9VTV9_DROME	Delta-aminolevulinic acid dehydratase OS=Drosophila melanogaster GN=Pbgs PE=2 SV=1	1.01	0.98	1.09	1	0.97	0.95	1.01	24	8	36	33.4	0.235713	1.02	0.976667	0.957516	0.627616
2116.1	tr|Q9VR25|Q9VR25_DROME	CG15630 OS=Drosophila melanogaster GN=CG15630 PE=2 SV=2	1.01	0.92	1.06	0.92	1.04	1.02	1.04	10	6	51	9.9	0.236012	0.9775	1.03333	1.05712	0.627065
1649.1	tr|Q9VXR9|Q9VXR9_DROME	CG8128 OS=Drosophila melanogaster GN=CG8128 PE=2 SV=1	0.93	0.96	1.03	0.99	1.11	1.01	0.98	15	5	38	19.7	0.236012	0.9775	1.03333	1.05712	0.627065
1325.1	tr|Q95U34|Q95U34_DROME	CG5288, isoform A OS=Drosophila melanogaster GN=Galk PE=2 SV=1	0.95	0.95	1.08	0.93	1.03	1.02	1.05	20	10	54	18.5	0.236012	0.9775	1.03333	1.05712	0.627065
807.2	sp|Q9VCI3|LSD1_DROME	Lipid storage droplets surface-binding protein 1 OS=Drosophila melanogaster GN=Lsd-1 PE=1 SV=2	0.97	1.03	0.99	1.07	0.99	0.95	0.99	33	10	49	33.8	0.23653	1.015	0.976667	0.962233	0.626114
229.1	tr|Q8IRH0|Q8IRH0_DROME	LP21249p OS=Drosophila melanogaster GN=Psa PE=2 SV=1	0.98	0.9	1.06	0.97	1.04	1.02	1.03	114	33	120	47.4	0.236647	0.9775	1.03	1.05371	0.625899
2088.1	sp|P29993|ITPR_DROME	Inositol 1,4,5-trisphosphate receptor OS=Drosophila melanogaster GN=Itp-r83A PE=2 SV=3	0.96	0.92	1.07	0.96	1.02	1.05	1.02	10	8	319	1.6	0.236647	0.9775	1.03	1.05371	0.625899
1195.1	sp|Q9V813|MTAP_DROME	Putative S-methyl-5'-thioadenosine phosphorylase OS=Drosophila melanogaster GN=CG4802 PE=1 SV=1	0.94	0.93	1.06	0.98	1.04	1.06	0.99	23	10	32	35.9	0.236647	0.9775	1.03	1.05371	0.625899
112.1	tr|Q7KUB1|Q7KUB1_DROME	Isocitrate dehydrogenase [NADP] OS=Drosophila melanogaster GN=Idh PE=2 SV=1	1.01	0.9	1.06	0.93	1.04	1.03	1.03	247	22	53	235	0.236956	0.975	1.03333	1.05983	0.625332
1802.1	tr|A1Z904|A1Z904_DROME	Dystrobrevin-like, isoform C OS=Drosophila melanogaster GN=Dyb PE=4 SV=1	1.06	0.8	1.04	0.9	1.18	1	1.02	13	7	69	9.4	0.236956	0.95	1.06667	1.12281	0.625332
2568.1	sp|Q9VLS9|LACB2_DROME	Beta-lactamase-like protein 2 homolog OS=Drosophila melanogaster GN=CG12375 PE=1 SV=1	1.01	0.78	1.07	0.96	1.08	0.99	1.12	7	5	33	10.7	0.236986	0.955	1.06333	1.11344	0.625278
3610.1	tr|Q9VXJ7|Q9VXJ7_DROME	CG42353, isoform A OS=Drosophila melanogaster GN=CG42353 PE=2 SV=2	1.11	0.82	0.93	0.91	1.12	1.18	0.92	3	3	116	1.3	0.236998	0.9425	1.07333	1.13882	0.625256
3949.1	tr|Q9VKT9|Q9VKT9_DROME	Lipase 4 OS=Drosophila melanogaster GN=Lip4 PE=2 SV=1	1.09	0.89	0.93	0.95	1.09	1.06	0.98	3	1	50	3	0.237052	0.965	1.04333	1.08117	0.625156
4427.1	sp|Q9VTI8|CHRB_DROME	Protein charybde OS=Drosophila melanogaster GN=chrb PE=2 SV=2	0.99	0.97	1.14	1.03	1.02	0.97	0.88	2	1	32	3.1	0.237104	1.0325	0.956667	0.926554	0.625061
59.1	tr|Q9VD58|Q9VD58_DROME	CG6439, isoform A OS=Drosophila melanogaster GN=CG6439 PE=2 SV=1	1.02	0.93	1.02	0.96	1.05	1.03	0.99	542	13	40	671.5	0.237467	0.9825	1.02333	1.04156	0.624398
3208.1	tr|Q95R34|Q95R34_DROME	CG3191 OS=Drosophila melanogaster GN=crn PE=2 SV=1	1.02	0.91	1.04	0.89	1.05	0.96	1.13	4	4	36	5.5	0.237467	0.965	1.04667	1.08463	0.624398
5713.1	tr|Q7KUV8|Q7KUV8_DROME	CG6023, isoform B OS=Drosophila melanogaster GN=CG6023 PE=2 SV=1	0.86	0.83	1.14	0.9	1.07	0.93	1.27	1	1	38	1.3	0.237676	0.9325	1.09	1.1689	0.624014
4142.1	tr|A8E6W0|A8E6W0_DROME	CG34039, isoform B OS=Drosophila melanogaster GN=CG34039-RA PE=2 SV=1	0.8	0.65	1.29	0.83	1.19	1.32	0.93	2	2	22	4.5	0.237761	0.8925	1.14667	1.28478	0.62386
5776.1	tr|Q9W0U9|Q9W0U9_DROME	CG7051, isoform A OS=Drosophila melanogaster GN=Dic61B PE=2 SV=1	0.48	0.73	1.39	0.81	1.07	1.48	1.04	1	1	87	0.6	0.237882	0.8525	1.19667	1.40371	0.623638
5069.1	tr|Q1WWC1|Q1WWC1_DROME	CG30120 OS=Drosophila melanogaster GN=CG30120 PE=2 SV=1	1.02	1.02	1.14	0.94	0.98	0.94	0.97	1	1	57	0.9	0.2384	1.03	0.963333	0.935275	0.622694
988.1	tr|Q9VSU8|Q9VSU8_DROME	Nervous wreck OS=Drosophila melanogaster GN=nwk PE=1 SV=2	1	0.91	1.06	0.89	1.08	0.96	1.09	29	10	90	16.2	0.238437	0.965	1.04333	1.08117	0.622627
371.1	tr|Q7K3W2|Q7K3W2_DROME	CG8728 OS=Drosophila melanogaster GN=CG8728-RA PE=2 SV=1	1	0.93	1.02	0.98	1.05	1.06	0.97	79	13	61	64.7	0.238564	0.9825	1.02667	1.04495	0.622394
4231.1	sp|Q8I0P1|SPAST_DROME	Spastin OS=Drosophila melanogaster GN=spas PE=1 SV=2	0.9	0.96	1.05	0.96	1.09	0.94	1.1	2	2	83	1.2	0.238581	0.9675	1.04333	1.07838	0.622365
1579.1	tr|Q8SZY4|Q8SZY4_DROME	CG30104, isoform A OS=Drosophila melanogaster GN=CG4837 PE=2 SV=1	0.96	0.9	1.03	1.02	1.08	1.03	0.99	16	5	64	12.4	0.23874	0.9775	1.03333	1.05712	0.622074
1137.1	sp|Q9VYA0|NADE_DROME	Probable glutamine-dependent NAD(+) synthetase OS=Drosophila melanogaster GN=CG9940 PE=1 SV=1	0.93	0.91	1.04	1.01	1.09	1.03	0.98	25	8	88	14.3	0.238787	0.9725	1.03333	1.06255	0.62199
3613.1	tr|Q9VWK5|Q9VWK5_DROME	GH15225p OS=Drosophila melanogaster GN=Ulp1 PE=2 SV=1	0.8	0.91	1.18	0.85	1.2	0.98	1.08	3	3	172	0.9	0.238949	0.935	1.08667	1.16221	0.621695
4061.1	sp|O96838|FYV1_DROME	Putative 1-phosphatidylinositol-3-phosphate 5-kinase OS=Drosophila melanogaster GN=fab1 PE=1 SV=2	1.04	0.77	1.07	0.85	1.16	1.21	0.9	2	2	205	0.5	0.239043	0.9325	1.09	1.1689	0.621524
2899.1	tr|Q9VRF7|Q9VRF7_DROME	CG32521, isoform A OS=Drosophila melanogaster GN=CG32521-RA PE=2 SV=2	0.98	0.87	0.99	1	1.05	0.93	1.19	6	2	36	8.2	0.239095	0.96	1.05667	1.10069	0.62143
1804.1	sp|Q9V9A7|MCCB_DROME	Probable methylcrotonoyl-CoA carboxylase beta chain, mitochondrial OS=Drosophila melanogaster GN=l(2)04524 PE=2 SV=1	0.96	0.95	1.06	0.95	1.02	1	1.06	13	6	63	10.4	0.239293	0.98	1.02667	1.04762	0.62107
4155.1	tr|Q9VGH2|Q9VGH2_DROME	CG6959, isoform A OS=Drosophila melanogaster GN=CG6959 PE=2 SV=1	1.05	0.66	0.98	1.05	1.16	1.01	1.1	2	2	48	2.1	0.239351	0.935	1.09	1.16578	0.620965
3814.1	tr|Q6NP91|Q6NP91_DROME	CG11210 OS=Drosophila melanogaster GN=CG11210 PE=2 SV=1	0.85	0.83	1.15	0.9	1.27	0.95	1.05	3	2	86	1.7	0.239384	0.9325	1.09	1.1689	0.620905
1121.1	tr|Q9VLS7|Q9VLS7_DROME	CG8552 OS=Drosophila melanogaster GN=CG8552 PE=2 SV=1	1.03	0.91	1.04	0.92	1.06	1.04	1	25	13	214	5.8	0.239448	0.975	1.03333	1.05983	0.620788
1596.1	tr|Q9VK44|Q9VK44_DROME	CG9934, isoform A OS=Drosophila melanogaster GN=CG9934 PE=2 SV=1	0.93	1.01	1	0.94	1.15	0.97	1	15	9	139	5.4	0.239724	0.97	1.04	1.07216	0.620289
3287.1	tr|Q9W461|Q9W461_DROME	CG16721 OS=Drosophila melanogaster GN=CG16721 PE=2 SV=1	1.04	1.01	1.01	1.03	1.03	1	0.88	4	3	56	3.6	0.239724	1.0225	0.97	0.948655	0.620289
5590.1	tr|Q9VRM3|Q9VRM3_DROME	Sinuous OS=Drosophila melanogaster GN=sinu PE=2 SV=3	1.08	0.86	0.99	0.85	1.05	1.23	0.94	1	1	28	1.8	0.239838	0.945	1.07333	1.1358	0.620083
[truncated: 3,955 more rows]

## Sheet: p<0.05
Quantified Proteins - RpS28a OE vs Control with p<0.05
			Control -replicate #1	Control - replicate #2	Control - replicate #3	Control - replicate #4	RpS28a OE - replicate #1	RpS28a OE - replicate #2	RpS28a OE - replicate #3
Group	Accession #	Protein Annotation	sig126	sig127	sig127b	sig128	sig128b	sig129	sig129b	SC	TP	MW (KD)	Abundance	p-value	Average Control	Average RpS28a OE	FoldChange (RpS28a OE/Control)
1309.1	tr|Q9VAB9|Q9VAB9_DROME	RT02924p OS=Drosophila melanogaster GN=RpS28a PE=2 SV=1	0.3	0.28	0.34	0.31	1.99	2.18	1.61	21	3	7	143.4	8.76748e-05	0.3075	1.92667	6.26558
2637.1	tr|Q9VGF1|Q9VGF1_DROME	CG3397 OS=Drosophila melanogaster GN=CG3397 PE=2 SV=1	0.45	0.32	0.47	0.39	1.67	1.53	2.18	7	4	38	9.2	0.000451354	0.4075	1.79333	4.40082
3306.1	tr|Q9VBS4|Q9VBS4_DROME	CG10553 OS=Drosophila melanogaster GN=CG10553 PE=2 SV=1	0.73	0.61	0.73	0.71	1.45	1.33	1.44	4	3	48	4.2	2.22765e-05	0.695	1.40667	2.02398
4883.1	sp|Q9VP65|TR112_DROME	TRM112-like protein OS=Drosophila melanogaster GN=CG12975 PE=2 SV=1	1.23	0.58	0.47	0.56	1.49	1.39	1.28	1	1	14	3.6	0.0246918	0.71	1.38667	1.95305
5368.1	tr|Q9VPE6|Q9VPE6_DROME	CG32428, isoform A OS=Drosophila melanogaster GN=CG5145 PE=2 SV=2	0.61	0.53	0.56	1.14	1.43	1.32	1.4	1	1	22	2.3	0.011477	0.71	1.38333	1.94836
5523.1	sp|P14954|CECA_DROME	Cecropin-A1/A2 OS=Drosophila melanogaster GN=CecA1 PE=2 SV=1	0.82	0.58	0.75	0.71	1.92	1.08	1.14	1	1	7	7.4	0.0362132	0.715	1.38	1.93007
5148.1	tr|O61351|O61351_DROME	La costa OS=Drosophila melanogaster GN=lcs PE=2 SV=1	0.83	0.68	0.84	0.6	1.56	1.46	1.03	1	1	13	3.9	0.0102113	0.7375	1.35	1.83051
5313.1	tr|Q9VK63|Q9VK63_DROME	CG5776 OS=Drosophila melanogaster GN=CG5776 PE=2 SV=1	0.63	1.19	0.66	0.59	1.46	1.33	1.14	1	1	89	0.6	0.0323369	0.7675	1.31	1.70684
5214.1	tr|A1ZB10|A1ZB10_DROME	CG30110 OS=Drosophila melanogaster GN=CG30110 PE=4 SV=1	0.71	0.74	0.98	0.68	1.41	1.1	1.38	1	1	71	0.7	0.00649906	0.7775	1.29667	1.66774
4040.1	sp|Q9Y140|DHRS7_DROME	Dehydrogenase/reductase SDR family protein 7-like OS=Drosophila melanogaster GN=CG7601 PE=2 SV=1	0.86	0.65	0.93	0.76	1.34	1.04	1.43	2	2	36	2.8	0.0120489	0.8	1.27	1.5875
5011.1	tr|Q9VTG0|Q9VTG0_DROME	CG42575 OS=Drosophila melanogaster GN=CG7628-RA PE=2 SV=2	0.74	0.76	0.87	0.86	1.25	1.27	1.25	1	1	72	0.7	9.82764e-05	0.8075	1.25667	1.55624
4366.1	sp|O97172|U729_DROME	UPF0729 protein CG18508 OS=Drosophila melanogaster GN=CG18508 PE=1 SV=1	0.66	0.77	0.98	0.83	1.31	0.93	1.52	2	1	11	9	0.0431349	0.81	1.25333	1.54733
4890.1	tr|Q9VJK5|Q9VJK5_DROME	CG4580 OS=Drosophila melanogaster GN=CG4580 PE=2 SV=3	0.67	0.89	0.79	0.89	1.2	1.4	1.16	1	1	72	0.7	0.00390875	0.81	1.25333	1.54733
5229.1	tr|Q9VUU8|Q9VUU8_DROME	CG15715 OS=Drosophila melanogaster GN=CG15715-RA PE=2 SV=1	0.83	0.64	0.94	0.85	1.28	0.99	1.46	1	1	9	5.7	0.0258567	0.815	1.24333	1.52556
5461.1	sp|P07207|NOTCH_DROME	Neurogenic locus Notch protein OS=Drosophila melanogaster GN=N PE=1 SV=3	0.72	0.64	1.17	0.74	1.17	1.26	1.29	1	1	289	0.2	0.0328971	0.8175	1.24	1.51682
5116.1	tr|Q9VA87|Q9VA87_DROME	CG9733 OS=Drosophila melanogaster GN=CG9733 PE=2 SV=1	0.73	0.7	0.99	0.86	1.38	1.06	1.28	1	1	47	1.1	0.0130746	0.82	1.24	1.5122
5142.1	tr|Q9VCA1|Q9VCA1_DROME	AT01267p OS=Drosophila melanogaster GN=CG13611 PE=2 SV=1	0.58	0.63	1.02	1.05	1.18	1.3	1.24	1	1	54	0.9	0.0383007	0.82	1.24	1.5122
4716.1	tr|Q9VXT0|Q9VXT0_DROME	CG8097 OS=Drosophila melanogaster GN=CG8097 PE=2 SV=1	1.05	0.59	0.83	0.81	1.35	1.14	1.22	1	1	51	1	0.019179	0.82	1.23667	1.50813
5522.1	sp|Q8IQF1-3|MOCS1_DROME	Isoform B of Molybdenum cofactor biosynthesis protein 1 OS=Drosophila melanogaster GN=Mocs1	0.88	0.71	0.86	0.85	1.17	1.39	1.14	1	1	16	3	0.00383241	0.825	1.23333	1.49495
5492.1	sp|Q27272|TAF9_DROME	Transcription initiation factor TFIID subunit 9 OS=Drosophila melanogaster GN=e(y)1 PE=1 SV=1	0.77	0.73	1.03	0.78	1.41	1.18	1.09	1	1	29	1.7	0.0170107	0.8275	1.22667	1.48238
5312.1	tr|Q9VVK6|Q9VVK6_DROME	CG32186 OS=Drosophila melanogaster GN=CG32186 PE=4 SV=2	0.71	0.92	0.86	0.82	1.07	1.37	1.23	1	1	171	0.3	0.00685029	0.8275	1.22333	1.47835
1373.1	sp|Q9VFJ0|CP131_DROME	Probable cytochrome P450 313a1 OS=Drosophila melanogaster GN=Cyp313a1 PE=3 SV=2	0.89	0.84	0.8	0.8	1.27	1.13	1.27	19	12	56	16.8	0.000391154	0.8325	1.22333	1.46947
4710.1	tr|Q9VD66|Q9VD66_DROME	Female-specific independent of transformer OS=Drosophila melanogaster GN=fit PE=2 SV=1	0.87	0.69	1.05	0.73	1.23	1.45	0.98	1	1	14	3.6	0.0491208	0.835	1.22	1.46108
4319.1	tr|A1ZAN7|A1ZAN7_DROME	RhoGEF2, isoform E OS=Drosophila melanogaster GN=RhoGEF2 PE=4 SV=1	0.77	0.99	0.97	0.64	1.38	1.23	1.02	2	2	242	0.4	0.0388536	0.8425	1.21	1.4362
4116.1	tr|Q9Y141|Q9Y141_DROME	BcDNA.GH05741 OS=Drosophila melanogaster GN=BcDNA.GH05741 PE=2 SV=1	0.91	0.81	0.89	0.79	1.32	1.05	1.23	2	2	63	1.6	0.00549561	0.85	1.2	1.41176
3539.1	tr|B7Z103|B7Z103_DROME	CG42323, isoform E OS=Drosophila melanogaster GN=CG42323 PE=4 SV=1	0.88	0.77	1.02	0.74	1.28	1.2	1.1	4	1	25	7.9	0.0110948	0.8525	1.19333	1.3998
5511.1	tr|A1Z977|A1Z977_DROME	CG33798 OS=Drosophila melanogaster GN=CG33798 PE=4 SV=1	0.78	0.71	0.99	0.94	1.22	1.09	1.27	1	1	21	2.4	0.0131449	0.855	1.19333	1.39571
5459.1	tr|A1Z7G0|A1Z7G0_DROME	CG42326, isoform D OS=Drosophila melanogaster GN=CG14748 PE=4 SV=1	0.65	0.92	1.05	0.81	1.13	1.12	1.32	1	1	108	0.5	0.0332834	0.8575	1.19	1.38776
3053.1	sp|P10090|WHITE_DROME	Protein white OS=Drosophila melanogaster GN=w PE=2 SV=2	0.87	0.82	0.85	0.89	1.25	1.22	1.09	5	3	76	3.3	0.000726873	0.8575	1.18667	1.38387
5753.1	tr|Q7K087|Q7K087_DROME	CG17574, isoform A OS=Drosophila melanogaster GN=CG17574 PE=2 SV=1	0.92	0.75	0.85	0.92	1.13	1.37	1.07	1	1	17	3	0.0146423	0.86	1.19	1.38372
3547.1	tr|Q9VP06|Q9VP06_DROME	CG11306 OS=Drosophila melanogaster GN=CG11306 PE=2 SV=2	0.86	0.86	0.8	0.92	1.15	1.36	1.05	3	3	55	2.8	0.0103593	0.86	1.18667	1.37984
5207.1	sp|O16844|COS_DROME	Kinesin-like protein costa OS=Drosophila melanogaster GN=cos PE=1 SV=2	0.73	0.83	1.04	0.85	1.23	1.29	1.03	1	1	133	0.4	0.0245849	0.8625	1.18333	1.37198
3615.1	tr|Q9VST4|Q9VST4_DROME	CG5144 OS=Drosophila melanogaster GN=CG5144 PE=1 SV=1	0.95	0.68	0.97	0.85	1.23	1.08	1.23	3	3	44	3.4	0.0159896	0.8625	1.18	1.36812
4934.1	tr|Q9VGW5|Q9VGW5_DROME	CG14687 OS=Drosophila melanogaster GN=CG14687 PE=2 SV=1	0.82	0.76	0.99	0.89	1.21	1.24	1.1	1	1	16	3.2	0.00558089	0.865	1.18333	1.36802
990.1	tr|Q9XZ61|Q9XZ61_DROME	26S proteasome regulatory complex subunit p37A OS=Drosophila melanogaster GN=Uch-L3 PE=2 SV=1	0.9	0.81	0.92	0.85	1.19	1.23	1.11	29	10	38	38.5	0.000725552	0.87	1.17667	1.35249
2194.1	tr|Q9VD48|Q9VD48_DROME	CG5791 OS=Drosophila melanogaster GN=CG5791 PE=2 SV=1	0.98	0.79	0.92	0.79	1.09	1.06	1.38	10	2	10	49	0.0302734	0.87	1.17667	1.35249
5426.1	tr|Q8ING1|Q8ING1_DROME	CG31327 OS=Drosophila melanogaster GN=CG31327 PE=2 SV=1	0.84	0.75	1	0.9	1.08	1.3	1.12	1	1	98	0.5	0.0172807	0.8725	1.16667	1.33715
4546.1	sp|Q24025|SOG_DROME	Dorsal-ventral patterning protein Sog OS=Drosophila melanogaster GN=sog PE=1 SV=1	0.92	0.95	0.85	0.78	1.1	1.17	1.24	2	1	115	0.9	0.00333605	0.875	1.17	1.33714
5347.1	tr|Q9VV47|Q9VV47_DROME	CG4842 OS=Drosophila melanogaster GN=CG4842 PE=2 SV=2	0.73	0.9	0.93	0.94	1.3	1.25	0.96	1	1	28	1.8	0.0387578	0.875	1.17	1.33714
3787.1	tr|Q9VH02|Q9VH02_DROME	CG6293 OS=Drosophila melanogaster GN=CG6293-RA PE=2 SV=1	0.88	0.75	1.01	0.86	1.34	0.98	1.18	3	2	62	2.4	0.042194	0.875	1.16667	1.33333
4735.1	tr|Q8SXR4|Q8SXR4_DROME	CG30339 OS=Drosophila melanogaster GN=CG30339 PE=2 SV=1	0.95	0.73	0.95	0.88	1.18	1.26	1.05	1	1	36	1.4	0.0159306	0.8775	1.16333	1.32574
4989.1	tr|Q9VDF8|Q9VDF8_DROME	CG31189 OS=Drosophila melanogaster GN=CG31189 PE=4 SV=4	0.8	0.86	1.05	0.81	1.2	1.06	1.22	1	1	30	1.7	0.0178435	0.88	1.16	1.31818
2103.1	tr|Q9VGT8|Q9VGT8_DROME	Ugt86Dd (Fragment) OS=Drosophila melanogaster GN=Ugt86Dd PE=3 SV=2	0.88	0.84	0.93	0.88	1.13	1.2	1.14	10	6	59	8.5	0.000204355	0.8825	1.15667	1.31067
1130.1	tr|Q7KUC2|Q7KUC2_DROME	CG34455 OS=Drosophila melanogaster GN=CG34455-RC PE=2 SV=1	0.93	0.78	0.95	0.87	1.13	1.2	1.14	25	9	33	37.4	0.00245379	0.8825	1.15667	1.31067
5114.1	tr|Q9VGQ8|Q9VGQ8_DROME	CG17184, isoform A OS=Drosophila melanogaster GN=CG17184 PE=2 SV=1	0.93	0.79	1	0.81	1.19	1.19	1.09	1	1	39	1.3	0.00849765	0.8825	1.15667	1.31067
2321.1	tr|Q9VGA1|Q9VGA1_DROME	Glutathione S transferase D10 OS=Drosophila melanogaster GN=GstD10 PE=1 SV=1	0.74	0.97	0.9	0.93	1.08	1.3	1.08	9	3	25	18.3	0.0257906	0.885	1.15333	1.3032
4986.1	tr|Q7JR83|Q7JR83_DROME	CG11055, isoform A OS=Drosophila melanogaster GN=CG11055 PE=2 SV=1	0.89	0.91	0.9	0.84	1.17	1.14	1.15	1	1	97	0.5	3.93771e-05	0.885	1.15333	1.3032
5607.1	sp|P28750|EXU_DROME	Maternal protein exuperantia OS=Drosophila melanogaster GN=exu PE=1 SV=2	0.82	0.95	0.97	0.8	1.17	1.2	1.08	1	1	58	0.9	0.00684109	0.885	1.15	1.29944
4182.1	tr|Q8IGV3|Q8IGV3_DROME	CG12746, isoform B OS=Drosophila melanogaster GN=CG12746 PE=2 SV=1	0.85	0.88	1.06	0.76	1.27	1.02	1.16	2	2	41	2.4	0.040965	0.8875	1.15	1.29577
710.1	sp|Q9VGR2|MIDA_DROME	Protein midA homolog, mitochondrial OS=Drosophila melanogaster GN=CG17726 PE=1 SV=1	0.93	0.83	0.93	0.86	1.16	1.16	1.13	41	12	49	41.8	0.000381386	0.8875	1.15	1.29577
3662.1	tr|Q5BI62|Q5BI62_DROME	LP14331p OS=Drosophila melanogaster GN=Mdr50 PE=2 SV=1	0.95	0.73	0.94	0.93	1.09	1.09	1.27	3	3	145	1	0.0219372	0.8875	1.15	1.29577
4365.1	tr|Q7PLV6|Q7PLV6_DROME	CG40470 OS=Drosophila melanogaster GN=CG40470-RA PE=2 SV=2	0.85	0.88	0.88	0.95	1.12	1.19	1.14	2	1	109	0.9	0.000368416	0.89	1.15	1.29213
4992.1	tr|Q9VN52|Q9VN52_DROME	CG31530 OS=Drosophila melanogaster GN=CG31530 PE=1 SV=2	0.97	0.88	0.96	0.75	1.27	1	1.18	1	1	69	0.7	0.0337099	0.89	1.15	1.29213
2720.1	sp|Q03372|HMSH_DROME	Muscle segmentation homeobox OS=Drosophila melanogaster GN=Dr PE=2 SV=2	0.76	0.9	0.96	0.94	1.23	1.06	1.15	7	1	54	6.5	0.0124796	0.89	1.14667	1.28839
3863.1	tr|Q7JWU9|Q7JWU9_DROME	AT07420p OS=Drosophila melanogaster GN=CG14480 PE=2 SV=1	0.97	0.9	0.97	0.73	1.26	1.08	1.09	3	2	28	5.3	0.0292541	0.8925	1.14333	1.28105
4310.1	tr|Q9VNB4|Q9VNB4_DROME	CG2663, isoform A OS=Drosophila melanogaster GN=CG2663 PE=2 SV=1	0.91	0.77	0.96	0.93	1.16	1.03	1.24	2	2	35	2.8	0.0170775	0.8925	1.14333	1.28105
3219.1	tr|Q8SYC4|Q8SYC4_DROME	CG13893 OS=Drosophila melanogaster GN=CG13893 PE=2 SV=1	0.8	0.96	0.94	0.88	1.09	1.04	1.3	4	4	48	4.2	0.0256278	0.895	1.14333	1.27747
4077.1	tr|Q9VD09|Q9VD09_DROME	GH10582p OS=Drosophila melanogaster GN=pinta PE=2 SV=1	0.85	1.02	0.93	0.78	1.04	1.12	1.27	2	2	32	3.2	0.0306604	0.895	1.14333	1.27747
5693.1	sp|P22270|OAR_DROME	Tyramine/octopamine receptor OS=Drosophila melanogaster GN=TyrR PE=2 SV=2	0.89	0.9	0.96	0.82	1.05	1.18	1.19	1	1	65	0.8	0.00456498	0.8925	1.14	1.27731
1504.1	tr|Q9VBR6|Q9VBR6_DROME	CG11909 OS=Drosophila melanogaster GN=tobi PE=2 SV=1	1.03	0.92	0.91	0.72	1.13	1.17	1.12	17	7	75	11.4	0.0247291	0.895	1.14	1.27374
3701.1	tr|A8WHL4|A8WHL4_DROME	Bonus, isoform B OS=Drosophila melanogaster GN=bon PE=2 SV=1	0.91	0.78	0.83	1.06	1.13	1.2	1.09	3	3	121	1.2	0.0247291	0.895	1.14	1.27374
4573.1	tr|A4V3L8|A4V3L8_DROME	CG7816, isoform D OS=Drosophila melanogaster GN=CG7816 PE=4 SV=1	0.94	0.84	0.87	0.93	1.09	1.3	1.02	2	1	39	2.6	0.0244178	0.895	1.13667	1.27002
4782.1	tr|Q9VBE6|Q9VBE6_DROME	CG5455, isoform A OS=Drosophila melanogaster GN=CG5455 PE=2 SV=1	0.83	0.84	0.96	0.97	1.15	1.06	1.2	1	1	77	0.7	0.00839537	0.9	1.13667	1.26296
4567.1	tr|Q8IQU7|Q8IQU7_DROME	825-Oak OS=Drosophila melanogaster GN=825-Oak PE=4 SV=2	0.93	0.85	1.01	0.81	1.14	1.16	1.1	2	1	13	7.9	0.00785808	0.9	1.13333	1.25926
1456.1	tr|Q9VTU9|Q9VTU9_DROME	CG6910 OS=Drosophila melanogaster GN=CG6910 PE=2 SV=3	0.93	0.81	1.01	0.86	1.14	1.1	1.16	18	6	34	26.3	0.00761423	0.9025	1.13333	1.25577
4218.1	tr|Q7K2N3|Q7K2N3_DROME	CG4288, isoform A OS=Drosophila melanogaster GN=CG4288 PE=2 SV=1	0.84	0.9	0.98	0.89	1.11	1.18	1.1	2	2	56	1.8	0.00240334	0.9025	1.13	1.25208
2075.1	sp|Q4V5I9|SDF2A_DROME	Succinate dehydrogenase assembly factor 2-A, mitochondrial OS=Drosophila melanogaster GN=CG14757 PE=2 SV=1	0.86	0.88	0.94	0.93	1.07	1.04	1.28	11	1	19	28.7	0.0195286	0.9025	1.13	1.25208
1929.1	tr|Q9V3T3|Q9V3T3_DROME	BcDNA.GH03016 OS=Drosophila melanogaster GN=Rh50 PE=2 SV=1	0.91	0.84	0.9	0.96	1.28	1.13	0.98	12	4	48	12.4	0.0332781	0.9025	1.13	1.25208
1909.1	tr|A1Z8H7|A1Z8H7_DROME	Cuticular protein 47Ef, isoform A OS=Drosophila melanogaster GN=Cpr47Ef PE=4 SV=1	1.06	0.82	0.94	0.79	1.12	1.04	1.23	12	5	51	11.9	0.0462329	0.9025	1.13	1.25208
2409.1	tr|Q9W0M0|Q9W0M0_DROME	CG13890 OS=Drosophila melanogaster GN=CG13890 PE=1 SV=1	0.9	0.83	0.95	0.93	1.13	1.1	1.16	8	5	29	13.7	0.00117114	0.9025	1.13	1.25208
4905.1	tr|Q9VHX7|Q9VHX7_DROME	CG2781 OS=Drosophila melanogaster GN=CG2781 PE=2 SV=2	0.87	0.88	0.86	1	1.28	1.14	0.97	1	1	38	1.3	0.0430349	0.9025	1.13	1.25208
4482.1	tr|Q9VVA1|Q9VVA1_DROME	CG9706, isoform A OS=Drosophila melanogaster GN=CG9706 PE=2 SV=1	0.9	0.88	0.88	0.95	1.23	1.17	0.99	2	1	59	1.7	0.0157545	0.9025	1.13	1.25208
3103.1	sp|Q9Y0I1|EAF3_DROME	NuA4 complex subunit EAF3 homolog OS=Drosophila melanogaster GN=MRG15 PE=1 SV=1	0.91	0.93	0.78	1	1.19	1.1	1.1	5	3	47	5.3	0.0131631	0.905	1.13	1.24862
571.1	sp|P20432|GSTT1_DROME	Glutathione S-transferase 1-1 OS=Drosophila melanogaster GN=GstD1 PE=1 SV=1	0.95	0.84	1.04	0.79	1.14	1.04	1.21	52	6	24	109	0.0345705	0.905	1.13	1.24862
369.1	tr|Q86BJ0|Q86BJ0_DROME	CG18135, isoform C OS=Drosophila melanogaster GN=CG18135 PE=2 SV=1	0.96	0.86	0.98	0.81	1.14	1.08	1.16	79	20	80	49.1	0.00761228	0.9025	1.12667	1.24838
1919.1	tr|Q9XZ53|Q9XZ53_DROME	Oligosaccharyl transferase 3 OS=Drosophila melanogaster GN=OstStt3 PE=1 SV=1	0.93	0.81	1.03	0.86	1.17	1.04	1.18	12	5	88	6.8	0.0219872	0.9075	1.13	1.24518
4070.1	tr|Q9VPC3|Q9VPC3_DROME	CG4074 OS=Drosophila melanogaster GN=CG4074 PE=2 SV=1	1.08	0.85	0.85	0.84	1.18	1.16	1.04	2	2	33	3	0.036419	0.905	1.12667	1.24494
3008.1	tr|Q9VGS9|Q9VGS9_DROME	LD21102p OS=Drosophila melanogaster GN=Ugt35a PE=2 SV=1	0.94	0.84	0.96	0.89	1.04	1.08	1.26	5	4	61	4.1	0.0197777	0.9075	1.12667	1.24151
1163.1	tr|Q8SXC0|Q8SXC0_DROME	CG5577 OS=Drosophila melanogaster GN=CG5577 PE=2 SV=1	1.06	0.87	0.88	0.81	1.05	1.13	1.19	24	8	35	34.6	0.0293783	0.905	1.12333	1.24125
851.1	sp|Q9VLZ7|C4D21_DROME	Probable cytochrome P450 4d21 OS=Drosophila melanogaster GN=Cyp4d21 PE=3 SV=1	1.01	0.88	0.9	0.85	1.08	1.12	1.17	34	7	58	29.2	0.00599409	0.91	1.12333	1.23443
5331.1	tr|Q9VXW7|Q9VXW7_DROME	Germ cell-expressed bHLH-PAS OS=Drosophila melanogaster GN=gce PE=2 SV=1	0.9	0.82	0.99	0.92	1.17	1.1	1.09	1	1	77	0.7	0.00596303	0.9075	1.12	1.23416
2011.1	sp|P52302|MBN_DROME	Protein lethal(3)malignant blood neoplasm 1 OS=Drosophila melanogaster GN=l(3)mbn PE=2 SV=2	0.85	0.94	0.93	0.91	1.16	1.07	1.13	11	6	67	8.2	0.00125935	0.9075	1.12	1.23416
2050.1	tr|Q9VCR4|Q9VCR4_DROME	CG17111 OS=Drosophila melanogaster GN=CG17111 PE=2 SV=1	0.92	0.87	0.96	0.88	1.12	1.18	1.06	11	4	88	6.3	0.00247817	0.9075	1.12	1.23416
4818.1	tr|Q6NN55|Q6NN55_DROME	CG18445 OS=Drosophila melanogaster GN=oys PE=2 SV=1	0.93	0.94	0.94	0.83	1.07	1.13	1.16	1	1	81	0.6	0.002862	0.91	1.12	1.23077
4533.1	sp|P18490|PCX_DROME	Protein pecanex OS=Drosophila melanogaster GN=pcx PE=2 SV=3	0.9	0.82	0.97	0.95	1.24	1.02	1.1	2	1	367	0.3	0.0255027	0.91	1.12	1.23077
2198.1	tr|A1Z9D9|A1Z9D9_DROME	Bb in a boxcar, isoform A OS=Drosophila melanogaster GN=bbc PE=3 SV=1	0.87	0.87	1	0.9	1.12	1	1.24	10	2	46	10.8	0.027897	0.91	1.12	1.23077
1872.1	tr|Q9VBS3|Q9VBS3_DROME	CG10560 OS=Drosophila melanogaster GN=CG10560 PE=2 SV=2	0.92	0.95	0.88	0.89	1.19	1.09	1.07	12	8	48	12.5	0.00231902	0.91	1.11667	1.22711
3770.1	sp|Q95RA8|MOB1_DROME	Mps one binder kinase activator-like 1 OS=Drosophila melanogaster GN=mats PE=1 SV=1	0.95	0.8	1.07	0.82	1.11	1.15	1.09	3	2	25	6	0.041479	0.91	1.11667	1.22711
1960.1	tr|Q9VVT6|Q9VVT6_DROME	CG6852, isoform A OS=Drosophila melanogaster GN=CG6852 PE=2 SV=1	0.92	0.9	0.95	0.88	1.13	1.12	1.1	12	2	12	48.4	0.000125481	0.9125	1.11667	1.22374
5520.1	sp|Q59E36|RCOR_DROME	REST corepressor OS=Drosophila melanogaster GN=CoRest PE=1 SV=1	0.84	0.9	0.95	0.96	1.19	1.1	1.06	1	1	70	0.7	0.00662499	0.9125	1.11667	1.22374
5330.1	sp|Q5EAK6|ATM_DROME	Serine/threonine-protein kinase ATM OS=Drosophila melanogaster GN=tefu PE=2 SV=1	0.81	0.94	0.96	0.94	1.1	1.16	1.09	1	1	318	0.2	0.00602678	0.9125	1.11667	1.22374
2001.1	sp|Q8T9B6|MESD_DROME	LDLR chaperone boca OS=Drosophila melanogaster GN=boca PE=1 SV=2	0.85	0.87	1.04	0.89	1.15	0.99	1.21	11	6	21	26.2	0.0418431	0.9125	1.11667	1.22374
1389.1	tr|Q9XZ01|Q9XZ01_DROME	Neprilysin 2 OS=Drosophila melanogaster GN=Nep2 PE=2 SV=1	0.92	0.86	1	0.88	1.12	1.07	1.16	19	9	87	10.9	0.00518595	0.915	1.11667	1.2204
3940.1	tr|Q9VKR7|Q9VKR7_DROME	CG7300 OS=Drosophila melanogaster GN=CG7300 PE=2 SV=2	0.89	0.89	1.07	0.81	1.18	1.07	1.1	3	1	80	1.9	0.0356139	0.915	1.11667	1.2204
5003.1	sp|Q9NIV1|E2AK3_DROME	Eukaryotic translation initiation factor 2-alpha kinase OS=Drosophila melanogaster GN=PEK PE=1 SV=2	0.94	0.8	0.96	0.96	1.03	1.1	1.22	1	1	131	0.4	0.0269735	0.915	1.11667	1.2204
3337.1	tr|Q9VS80|Q9VS80_DROME	CG8539 OS=Drosophila melanogaster GN=CG8539 PE=1 SV=1	0.91	0.84	0.96	0.94	1.14	1.14	1.06	4	3	44	4.5	0.00332538	0.9125	1.11333	1.22009
3036.1	tr|Q8IN71|Q8IN71_DROME	CG16718, isoform B OS=Drosophila melanogaster GN=CG16718 PE=2 SV=1	0.9	0.91	0.94	0.91	1.1	1.12	1.12	5	4	108	2.3	1.28852e-05	0.915	1.11333	1.21676
729.1	sp|Q9VE01|C12A5_DROME	Probable cytochrome P450 12a5, mitochondrial OS=Drosophila melanogaster GN=Cyp12a5 PE=2 SV=1	0.96	0.83	1.01	0.86	1.13	1.08	1.13	40	15	61	32.6	0.0122285	0.915	1.11333	1.21676
1932.1	tr|Q9VVW3|Q9VVW3_DROME	CG6812 OS=Drosophila melanogaster GN=CG6812-RA PE=2 SV=2	0.93	0.88	0.97	0.88	1.16	1.03	1.15	12	4	36	16.4	0.00601944	0.915	1.11333	1.21676
4112.1	sp|Q9VCG4|NDC1_DROME	Nucleoporin Ndc1 OS=Drosophila melanogaster GN=Ndc1 PE=1 SV=1	0.87	0.85	1.03	0.91	1.1	1.07	1.17	2	2	65	1.5	0.0141504	0.915	1.11333	1.21676
2125.1	sp|Q9V9L1|CP6W1_DROME	Probable cytochrome P450 6w1 OS=Drosophila melanogaster GN=Cyp6w1 PE=2 SV=1	1.04	0.89	0.94	0.79	1.11	1.02	1.21	10	6	59	8.4	0.0493004	0.915	1.11333	1.21676
5140.1	tr|Q0E981|Q0E981_DROME	CG8485, isoform A OS=Drosophila melanogaster GN=CG8485 PE=2 SV=1	0.83	0.89	0.97	0.98	1.21	1.04	1.09	1	1	96	0.5	0.0216777	0.9175	1.11333	1.21344
2664.1	sp|Q9VF71|CUTC_DROME	Copper homeostasis protein cutC homolog OS=Drosophila melanogaster GN=CG6136 PE=2 SV=1	0.87	0.92	0.96	0.91	1.11	1.17	1.05	7	3	29	12.1	0.00301327	0.915	1.11	1.21311
1969.1	tr|Q9VGC2|Q9VGC2_DROME	CG4860 OS=Drosophila melanogaster GN=CG4860 PE=2 SV=1	0.91	0.9	0.94	0.92	1.08	1.1	1.15	11	8	45	12.3	0.000211981	0.9175	1.11	1.20981
3543.1	sp|Q9W358|RIC8_DROME	Synembryn OS=Drosophila melanogaster GN=ric8a PE=1 SV=2	0.89	0.91	1.01	0.86	1.1	1.02	1.21	3	3	66	2.3	0.0237976	0.9175	1.11	1.20981
3665.1	tr|Q9VD40|Q9VD40_DROME	CG7084, isoform B OS=Drosophila melanogaster GN=CG7084 PE=2 SV=1	0.92	0.92	0.92	0.91	1.1	1.14	1.09	3	3	68	2.2	2.65539e-05	0.9175	1.11	1.20981
1566.1	tr|Q8MMC6|Q8MMC6_DROME	CG30427, isoform C OS=Drosophila melanogaster GN=CG30427 PE=2 SV=1	0.99	0.86	0.94	0.88	1.05	1.13	1.15	16	7	58	13.7	0.00673287	0.9175	1.11	1.20981
4438.1	sp|Q9VSF3|UBC12_DROME	NEDD8-conjugating enzyme Ubc12 OS=Drosophila melanogaster GN=CG7375 PE=1 SV=1	0.82	0.97	0.95	0.93	1.05	1.07	1.21	2	1	21	4.8	0.0208207	0.9175	1.11	1.20981
2338.1	tr|Q9W2S2|Q9W2S2_DROME	Autophagy-specific gene 8a OS=Drosophila melanogaster GN=Atg8a PE=2 SV=1	0.76	0.91	1.02	0.98	1.15	1.07	1.1	9	2	14	31.3	0.0435522	0.9175	1.10667	1.20618
3511.1	tr|Q8MLN7|Q8MLN7_DROME	Cuticular protein 60D OS=Drosophila melanogaster GN=Cpr60D PE=2 SV=1	0.95	0.88	0.96	0.89	1.07	1.05	1.2	4	1	10	19.5	0.00988796	0.92	1.10667	1.2029
4565.1	sp|Q9U1M2|TM120_DROME	Transmembrane protein 120 homolog OS=Drosophila melanogaster GN=CG32795 PE=1 SV=1	0.85	1.01	0.93	0.89	1.04	1.17	1.11	2	1	45	2.2	0.0148092	0.92	1.10667	1.2029
4590.1	tr|Q9W1J2|Q9W1J2_DROME	CG4797, isoform A OS=Drosophila melanogaster GN=CG4797 PE=2 SV=1	1.02	0.91	0.94	0.81	1.16	1.07	1.09	2	1	51	2	0.0209663	0.92	1.10667	1.2029
594.1	tr|Q8SZN1|Q8SZN1_DROME	CG31313 OS=Drosophila melanogaster GN=CG31313 PE=2 SV=1	0.98	0.86	1.02	0.82	1.11	1.1	1.11	50	4	14	184.9	0.0212494	0.92	1.10667	1.2029
1246.1	tr|Q9VY04|Q9VY04_DROME	CG9509 OS=Drosophila melanogaster GN=CG9509 PE=1 SV=1	0.92	0.8	0.98	0.98	1.18	1.03	1.11	22	7	71	15.5	0.0296023	0.92	1.10667	1.2029
5291.1	tr|Q9VCQ7|Q9VCQ7_DROME	LD40758p OS=Drosophila melanogaster GN=Rassf PE=2 SV=3	0.93	0.96	0.95	0.84	1.18	1.04	1.09	1	1	90	0.6	0.0115582	0.92	1.10333	1.19928
4731.1	sp|Q9VRL2|GOSR2_DROME	Probable Golgi SNAP receptor complex member 2 OS=Drosophila melanogaster GN=membrin PE=1 SV=1	0.87	1	1.01	0.82	1.15	1.02	1.14	1	1	25	2	0.0427354	0.925	1.10333	1.19279
5514.1	tr|Q7PLJ7|Q7PLJ7_DROME	CG17684 OS=Drosophila melanogaster GN=CG17684 PE=4 SV=4	0.92	0.88	0.92	0.97	1.25	1.05	1	1	1	97	0.5	0.0465945	0.9225	1.1	1.19241
4286.1	tr|Q8IP67|Q8IP67_DROME	CG9008, isoform B OS=Drosophila melanogaster GN=CG9008 PE=2 SV=2	1.03	0.83	0.98	0.87	1.13	1.03	1.15	2	2	23	4.4	0.0389987	0.9275	1.10333	1.18958
3331.1	tr|Q7K025|Q7K025_DROME	CG11892, isoform A OS=Drosophila melanogaster GN=CG11892 PE=2 SV=1	0.84	0.94	0.93	0.99	1.13	1.11	1.06	4	3	50	4	0.00783017	0.925	1.1	1.18919
5675.1	tr|B5RJS0|B5RJS0_DROME	CG42388, isoform E OS=Drosophila melanogaster GN=CG4040-RA PE=2 SV=1	0.96	0.82	0.94	0.98	1.16	1.07	1.07	1	1	139	0.4	0.0164926	0.925	1.1	1.18919
2877.1	tr|Q9VBC1|Q9VBC1_DROME	CG14246 OS=Drosophila melanogaster GN=CG14246 PE=1 SV=1	0.84	0.87	1.06	0.93	1.13	1.06	1.11	6	3	11	26.2	0.0335846	0.925	1.1	1.18919
3578.1	tr|Q9VBX8|Q9VBX8_DROME	CG33096, isoform C OS=Drosophila melanogaster GN=CG33096 PE=2 SV=2	0.89	0.94	0.97	0.91	1.21	1.05	1.04	3	3	32	4.6	0.0189484	0.9275	1.1	1.18598
3537.1	sp|Q9VWR5|CP306_DROME	Cytochrome P450 306a1 OS=Drosophila melanogaster GN=phm PE=1 SV=1	0.89	0.91	0.97	0.93	1.07	1.17	1.05	4	1	65	3.1	0.00566711	0.925	1.09667	1.18559
5570.1	tr|Q86B55|Q86B55_DROME	Diacylglycerol lipase isoform D OS=Drosophila melanogaster GN=inaE PE=2 SV=1	0.92	0.89	1.02	0.87	1.08	1.06	1.15	1	1	84	0.6	0.013015	0.925	1.09667	1.18559
3612.1	sp|Q9VKH6|PPT2_DROME	Lysosomal thioesterase PPT2 homolog OS=Drosophila melanogaster GN=Ppt2 PE=2 SV=1	1.01	0.95	0.86	0.88	1.13	1.14	1.02	3	3	33	4.6	0.0210921	0.925	1.09667	1.18559
3408.1	sp|Q9VH14|TIMP_DROME	Tissue inhibitor of metalloproteases OS=Drosophila melanogaster GN=Timp PE=2 SV=1	0.98	0.8	1	0.92	1.19	1.06	1.04	4	3	24	8.3	0.0486567	0.925	1.09667	1.18559
2150.1	tr|Q9VJ14|Q9VJ14_DROME	LD11955p OS=Drosophila melanogaster GN=mib2 PE=2 SV=1	0.95	0.94	0.99	0.83	1.07	1.12	1.1	10	5	115	4.4	0.010338	0.9275	1.09667	1.18239
1756.1	tr|Q0E8R1|Q0E8R1_DROME	FI07211p OS=Drosophila melanogaster GN=vir-1 PE=2 SV=1	0.98	0.9	1.01	0.82	1.08	1.02	1.19	14	3	49	14.4	0.0492039	0.9275	1.09667	1.18239
1740.1	tr|Q8T0T9|Q8T0T9_DROME	CG13920 OS=Drosophila melanogaster GN=BEST:CK00246 PE=2 SV=1	0.95	0.85	0.96	0.95	1.13	1.06	1.1	14	4	18	39.1	0.00478256	0.9275	1.09667	1.18239
4779.1	sp|P07664|SRYD_DROME	Serendipity locus protein delta OS=Drosophila melanogaster GN=Sry-delta PE=1 SV=2	0.93	0.92	0.99	0.87	1.05	1.09	1.15	1	1	50	1	0.00665187	0.9275	1.09667	1.18239
615.1	tr|Q9VGA0|Q9VGA0_DROME	Glutathione S transferase D9 OS=Drosophila melanogaster GN=GstD9 PE=2 SV=1	0.99	0.86	0.98	0.88	1.06	1.09	1.14	48	9	25	94.3	0.0122759	0.9275	1.09667	1.18239
2467.1	tr|Q94521|Q94521_DROME	Dopamine N acetyltransferase, isoform B OS=Drosophila melanogaster GN=Dat PE=2 SV=1	0.83	0.92	0.99	0.97	1.16	1.1	1.03	8	4	31	12.9	0.0236153	0.9275	1.09667	1.18239
3182.1	tr|Q9VYS9|Q9VYS9_DROME	CG10352 OS=Drosophila melanogaster GN=CG10352 PE=2 SV=2	0.99	0.88	1.01	0.83	1.1	1.13	1.06	5	1	35	7.2	0.0257818	0.9275	1.09667	1.18239
5366.1	tr|Q9VVX6|Q9VVX6_DROME	Bet1, isoform A OS=Drosophila melanogaster GN=Bet1 PE=2 SV=1	0.86	0.92	0.94	0.99	1.03	1.06	1.2	1	1	13	3.8	0.026148	0.9275	1.09667	1.18239
3765.1	tr|Q9VD30|Q9VD30_DROME	CG7077 OS=Drosophila melanogaster GN=CG7077 PE=2 SV=1	1.03	0.84	0.94	0.9	1.1	1.04	1.15	3	2	27	5.5	0.026148	0.9275	1.09667	1.18239
4191.1	tr|Q9VSJ5|Q9VSJ5_DROME	CG13667, isoform A OS=Drosophila melanogaster GN=CG13667 PE=2 SV=1	0.95	0.88	0.91	0.97	1.24	1.02	1.03	2	2	66	1.5	0.047114	0.9275	1.09667	1.18239
5273.1	tr|Q9VU77|Q9VU77_DROME	CG10133 OS=Drosophila melanogaster GN=CG10133 PE=2 SV=1	1.05	0.8	0.9	0.97	1.13	1.07	1.09	1	1	36	1.4	0.0492102	0.93	1.09667	1.17921
958.1	sp|Q9V773|C6A20_DROME	Probable cytochrome P450 6a20 OS=Drosophila melanogaster GN=Cyp6a20 PE=2 SV=2	0.9	0.99	0.91	0.92	1.04	1.1	1.15	30	10	58	26	0.00564089	0.93	1.09667	1.17921
775.1	tr|Q9V438|Q9V438_DROME	CaBP1 OS=Drosophila melanogaster GN=CaBP1 PE=2 SV=1	0.96	0.84	0.99	0.93	1.12	1.1	1.07	38	9	47	40.7	0.00896466	0.93	1.09667	1.17921
1484.1	tr|Q9VH96|Q9VH96_DROME	CG8358 OS=Drosophila melanogaster GN=CG8358 PE=2 SV=1	0.95	0.89	0.99	0.88	1.08	1.07	1.13	17	9	81	10.5	0.00479391	0.9275	1.09333	1.1788
1416.1	tr|Q9VJZ5|Q9VJZ5_DROME	LD07294p OS=Drosophila melanogaster GN=Tap42 PE=2 SV=2	0.94	0.89	0.98	0.9	1.03	1.17	1.08	19	5	43	21.9	0.0108988	0.9275	1.09333	1.1788
867.1	tr|Q9VSU2|Q9VSU2_DROME	Tequila, isoform A OS=Drosophila melanogaster GN=Tequila PE=2 SV=3	0.99	0.89	0.99	0.84	1.03	1.13	1.12	33	13	308	5.3	0.0238502	0.9275	1.09333	1.1788
2962.1	sp|Q9VU84|DBNL_DROME	Drebrin-like protein OS=Drosophila melanogaster GN=CG10083 PE=1 SV=1	0.91	0.85	1.06	0.89	1.09	1.12	1.07	5	5	59	4.3	0.0307955	0.9275	1.09333	1.1788
3635.1	tr|Q9VR33|Q9VR33_DROME	CG15626, isoform A OS=Drosophila melanogaster GN=CG15626-RA PE=2 SV=1	0.85	0.9	1	0.96	1.19	0.99	1.1	3	3	57	2.6	0.0445122	0.9275	1.09333	1.1788
4437.1	tr|Q9VPX2|Q9VPX2_DROME	CG4726 OS=Drosophila melanogaster GN=CG4726 PE=2 SV=1	0.93	0.9	1.01	0.88	1.14	1.07	1.07	2	1	55	1.8	0.00862741	0.93	1.09333	1.17563
5345.1	tr|Q9VKV6|Q9VKV6_DROME	CG5337 OS=Drosophila melanogaster GN=CG5337-RA PE=2 SV=2	0.9	0.87	1.01	0.94	1.02	1.17	1.09	1	1	81	0.6	0.0238722	0.93	1.09333	1.17563
307.1	tr|Q9VF51|Q9VF51_DROME	CG6045 OS=Drosophila melanogaster GN=CG6045-RA PE=2 SV=1	0.95	0.86	1.03	0.88	1.17	1	1.11	92	26	138	33.4	0.0456591	0.93	1.09333	1.17563
1999.1	tr|Q9VNA3|Q9VNA3_DROME	CG11999 OS=Drosophila melanogaster GN=CG11999 PE=2 SV=1	0.92	0.86	1.03	0.91	1.12	1.01	1.15	11	6	24	23.3	0.0318661	0.93	1.09333	1.17563
854.1	tr|Q9W3W4|Q9W3W4_DROME	COQ7 OS=Drosophila melanogaster GN=COQ7 PE=2 SV=2	0.88	0.88	1.07	0.89	1.15	1.03	1.1	34	6	24	70.7	0.0474436	0.93	1.09333	1.17563
2307.1	tr|Q9VSK4|Q9VSK4_DROME	CG6983 OS=Drosophila melanogaster GN=CG6983 PE=2 SV=1	0.88	0.93	0.95	0.97	1.04	1.11	1.13	9	4	20	22.1	0.0041772	0.9325	1.09333	1.17248
2757.1	tr|Q0KI81|Q0KI81_DROME	CG42327 OS=Drosophila melanogaster GN=CG14713 PE=2 SV=2	0.91	0.94	1	0.88	1.06	1.12	1.1	6	5	154	1.9	0.00501151	0.9325	1.09333	1.17248
3147.1	sp|Q9VSF4|DHYS_DROME	Probable deoxyhypusine synthase OS=Drosophila melanogaster GN=CG8005 PE=2 SV=2	0.9	0.85	1.07	0.91	1.09	1.05	1.14	5	2	41	6.1	0.0448971	0.9325	1.09333	1.17248
2769.1	sp|P35832-2|PTP99_DROME	Isoform A of Tyrosine-protein phosphatase 99A OS=Drosophila melanogaster GN=Ptp99A	0.94	0.83	1.04	0.91	1.14	1.09	1.04	6	5	137	2.2	0.0371248	0.93	1.09	1.17204
2910.1	tr|Q9VR42|Q9VR42_DROME	CG3008 OS=Drosophila melanogaster GN=CG3008 PE=2 SV=1	0.95	0.87	0.93	0.99	1.08	1.1	1.1	6	2	69	4.3	0.00329901	0.935	1.09333	1.16934
3498.1	tr|Q8SYF7|Q8SYF7_DROME	CG17715, isoform B OS=Drosophila melanogaster GN=CG17715 PE=2 SV=1	0.9	0.95	1	0.88	1.06	1.1	1.11	4	2	31	6.5	0.00587259	0.9325	1.09	1.1689
2609.1	tr|Q9W3T2|Q9W3T2_DROME	CG4593 OS=Drosophila melanogaster GN=CG4593-RA PE=2 SV=1	0.91	0.87	1.05	0.9	1.13	1.04	1.1	7	4	25	14.1	0.0297703	0.9325	1.09	1.1689
1534.1	tr|Q8SZA8|Q8SZA8_DROME	CG1319 OS=Drosophila melanogaster GN=CG1319 PE=2 SV=1	1.01	0.87	1	0.85	1.13	1.08	1.06	17	3	16	51.8	0.0306495	0.9325	1.09	1.1689
3494.1	tr|Q95TS2|Q95TS2_DROME	CG7777, isoform B OS=Drosophila melanogaster GN=CG7777 PE=2 SV=1	1.03	0.87	0.89	0.94	1.1	1.01	1.16	4	2	29	6.9	0.0369654	0.9325	1.09	1.1689
3443.1	tr|Q7KE33|Q7KE33_DROME	Odorant binding protein c OS=Drosophila melanogaster GN=Obp51a PE=2 SV=1	1.02	0.85	0.91	0.95	1.01	1.08	1.18	4	2	13	15	0.0444657	0.9325	1.09	1.1689
1347.1	tr|Q9VZI8|Q9VZI8_DROME	Fumarylacetoacetase OS=Drosophila melanogaster GN=Faa PE=2 SV=2	0.98	0.9	0.98	0.88	1.1	1.08	1.09	20	8	46	21.5	0.00438958	0.935	1.09	1.16578
2672.1	tr|Q9VQC0|Q9VQC0_DROME	Vesicular glutamate transporter OS=Drosophila melanogaster GN=VGlut PE=2 SV=2	0.93	0.85	1.03	0.92	1	1.12	1.14	7	3	69	5.1	0.0427754	0.9325	1.08667	1.16533
3733.1	sp|Q9VZE7|CTLH1_DROME	CTL-like protein 1 OS=Drosophila melanogaster GN=CG1311 PE=2 SV=1	0.91	1.02	0.92	0.88	1.13	0.98	1.15	3	2	77	1.9	0.0437652	0.9325	1.08667	1.16533
2677.1	tr|Q9VVE3|Q9VVE3_DROME	CG7724 OS=Drosophila melanogaster GN=CG7724 PE=2 SV=1	0.96	0.89	0.95	0.94	1.07	1.07	1.12	7	3	45	7.8	0.00122479	0.935	1.08667	1.16221
2848.1	tr|Q9V3A0|Q9V3A0_DROME	CG8997 OS=Drosophila melanogaster GN=CG8997 PE=2 SV=1	0.99	0.87	0.96	0.92	1.09	1.14	1.03	6	3	28	10.7	0.0135621	0.935	1.08667	1.16221
2920.1	tr|Q9VXD7|Q9VXD7_DROME	CG32573, isoform A OS=Drosophila melanogaster GN=CG4524 PE=2 SV=1	0.87	0.95	1.03	0.89	1.07	1.04	1.15	6	2	45	6.7	0.0302397	0.935	1.08667	1.16221
1502.1	tr|Q9W2G9|Q9W2G9_DROME	Acyl-Coenzyme A oxidase at 57D proximal OS=Drosophila melanogaster GN=Acox57D-p PE=2 SV=1	0.97	0.83	1.04	0.9	1.1	1.08	1.08	17	7	76	11.2	0.0370424	0.935	1.08667	1.16221
2487.1	tr|Q9VCJ8|Q9VCJ8_DROME	GH28857p OS=Drosophila melanogaster GN=SPE PE=2 SV=2	0.99	0.9	0.96	0.89	1.14	1.06	1.06	8	3	44	9.1	0.00847331	0.935	1.08667	1.16221
1840.1	tr|Q9VJI1|Q9VJI1_DROME	CG17928 OS=Drosophila melanogaster GN=CG17928 PE=2 SV=1	0.91	0.86	1.05	0.92	1.14	1.08	1.04	13	4	51	12.7	0.0370424	0.935	1.08667	1.16221
567.1	tr|Q9VM11|Q9VM11_DROME	CG5973, isoform A OS=Drosophila melanogaster GN=CG5973 PE=2 SV=2	0.95	0.92	0.97	0.91	1.06	1.05	1.15	52	8	36	72	0.00496367	0.9375	1.08667	1.15911
2197.2	tr|Q9VA42|Q9VA42_DROME	Niemann-Pick type C-2g OS=Drosophila melanogaster GN=Npc2g PE=2 SV=1	0.9	0.98	0.93	0.94	1.06	1.16	1.03	7	3	17	20.1	0.0124686	0.9375	1.08333	1.15556
4577.1	tr|Q9VVZ6|Q9VVZ6_DROME	CG12519 OS=Drosophila melanogaster GN=CG18294 PE=2 SV=2	1	0.85	0.98	0.92	1.11	1.1	1.04	2	1	13	7.9	0.0210161	0.9375	1.08333	1.15556
2119.1	sp|Q9GYV5|NEMO_DROME	NF-kappa-B essential modulator OS=Drosophila melanogaster GN=key PE=1 SV=1	0.95	0.84	1.03	0.93	1.07	1.1	1.08	10	6	44	11.4	0.0262896	0.9375	1.08333	1.15556
4376.1	sp|Q9W0C7|OPI10_DROME	Protein OPI10 homolog OS=Drosophila melanogaster GN=CG13926 PE=2 SV=1	0.93	0.87	0.98	0.97	1.05	1.18	1.02	2	1	22	4.6	0.0344928	0.9375	1.08333	1.15556
2636.2	tr|Q9I7S2|Q9I7S2_DROME	CG11158 OS=Drosophila melanogaster GN=CG11158 PE=2 SV=1	0.89	0.99	1.02	0.85	1.07	1.05	1.13	4	3	39	5.2	0.0371592	0.9375	1.08333	1.15556
5671.1	tr|Q86BA5|Q86BA5_DROME	LP01981p OS=Drosophila melanogaster GN=p24-2 PE=2 SV=1	0.95	0.91	0.95	0.95	1.15	1.07	1.03	1	1	28	1.8	0.00635477	0.94	1.08333	1.15248
4741.1	tr|Q8T8S1|Q8T8S1_DROME	AT31457p OS=Drosophila melanogaster GN=CG13322 PE=2 SV=1	0.88	0.89	1.01	0.97	1.04	1.13	1.07	1	1	38	1.3	0.0217008	0.9375	1.08	1.152
3883.1	tr|A8JQZ7|A8JQZ7_DROME	Flyers-cup, isoform E OS=Drosophila melanogaster GN=f-cup PE=4 SV=1	0.99	0.99	0.92	0.87	1.11	1.1	1.04	3	2	70	2.1	0.0155971	0.9425	1.08333	1.14943
2282.1	sp|Q9W1K5|SESN_DROME	Sestrin homolog OS=Drosophila melanogaster GN=CG11299 PE=1 SV=2	0.95	0.91	0.93	0.97	1.03	1.1	1.11	9	5	56	8.1	0.00298558	0.94	1.08	1.14894
4686.1	tr|B7Z0I7|B7Z0I7_DROME	CG42303 OS=Drosophila melanogaster GN=CG42303 PE=4 SV=1	0.93	0.95	0.91	0.97	1.01	1.16	1.07	1	1	41	1.2	0.0165484	0.94	1.08	1.14894
3608.1	sp|Q9VTX8|ODR4_DROME	Protein odr-4 homolog OS=Drosophila melanogaster GN=CG10616 PE=1 SV=2	0.98	0.84	0.98	0.96	1.08	1.06	1.1	3	3	55	2.8	0.0189271	0.94	1.08	1.14894
3133.1	tr|Q9VL66|Q9VL66_DROME	CG4592 OS=Drosophila melanogaster GN=CG4592-RA PE=2 SV=2	0.96	0.86	1.01	0.93	1.14	1.05	1.05	5	2	32	7.8	0.0260958	0.94	1.08	1.14894
1597.1	tr|Q9VBT7|Q9VBT7_DROME	CG10513 OS=Drosophila melanogaster GN=CG10513 PE=2 SV=2	0.89	1.03	0.9	0.94	1.13	1.05	1.06	15	9	49	15.3	0.0229398	0.94	1.08	1.14894
871.1	tr|Q9VCR9|Q9VCR9_DROME	CG17121 OS=Drosophila melanogaster GN=CG17121 PE=2 SV=1	0.98	0.9	0.98	0.91	1.12	1.07	1.05	33	10	39	41.8	0.00685786	0.9425	1.08	1.14589
4607.1	tr|Q7KWG9|Q7KWG9_DROME	CG17018, isoform D OS=Drosophila melanogaster GN=CG17018-RD PE=2 SV=1	0.92	0.96	0.98	0.91	1.06	1.04	1.14	2	1	148	0.7	0.0079152	0.9425	1.08	1.14589
1615.1	tr|Q0E9F3|Q0E9F3_DROME	CG8740, isoform A OS=Drosophila melanogaster GN=CG8740-RB PE=2 SV=1	0.91	0.91	1.06	0.89	1.1	1.1	1.04	15	8	113	6.7	0.039227	0.9425	1.08	1.14589
1773.1	tr|Q9VCF2|Q9VCF2_DROME	CG31140, isoform A OS=Drosophila melanogaster GN=CG31140 PE=2 SV=2	0.9	0.92	1.04	0.91	1.11	1.06	1.07	13	10	172	3.8	0.0199046	0.9425	1.08	1.14589
1280.1	tr|Q9VN39|Q9VN39_DROME	CG9775, isoform A OS=Drosophila melanogaster GN=CG9775 PE=2 SV=1	0.92	0.88	1.02	0.95	1.16	1.07	1.01	21	8	46	22.8	0.0416857	0.9425	1.08	1.14589
2695.1	sp|Q9W552|VPS26_DROME	Vacuolar protein sorting-associated protein 26 OS=Drosophila melanogaster GN=Vps26 PE=2 SV=1	0.9	0.99	0.93	0.94	1.13	1.07	1.03	7	2	53	6.7	0.0088541	0.94	1.07667	1.14539
108.1	tr|A4V1F9|A4V1F9_DROME	Ubiquitin-63E, isoform C OS=Drosophila melanogaster GN=Ubi-p63E PE=4 SV=1	0.91	0.87	1.01	0.97	1.11	1.1	1.02	263	5	86	153.4	0.0263095	0.94	1.07667	1.14539
128.2	sp|Q9W1V6|PRPD3_DROME	Diphenoloxidase subunit A3 OS=Drosophila melanogaster GN=Dox-A3 PE=1 SV=1	1.01	0.89	1.01	0.85	1.07	1.04	1.12	20	2	79	12.6	0.048198	0.94	1.07667	1.14539
1222.1	tr|Q9VXG9|Q9VXG9_DROME	CG4239, isoform A OS=Drosophila melanogaster GN=CG4239 PE=2 SV=1	0.86	0.93	1.01	0.97	1.1	1.01	1.12	23	4	30	37.9	0.0362846	0.9425	1.07667	1.14235
2261.1	tr|Q9VHC4|Q9VHC4_DROME	CG8176, isoform B OS=Drosophila melanogaster GN=CG8176 PE=2 SV=2	0.97	0.93	0.94	0.93	1.08	1.11	1.04	9	6	119	3.8	0.00119999	0.9425	1.07667	1.14235
[truncated: 302 more rows]

## Sheet: p<0.05 & >20% change
Quantified Proteins - RpS28a OE vs Control with p<0.05 & >20% change
[truncated: 130 more rows]
